# Supplementary material for: One-Pot and Catalyst-Free Transformation of N-Protected 1-Amino-1-Ethoxyalkylphosphonates into Bisphosphonic Analogs of Protein and Non-Protein α-Amino Acids
Source: MDPI journal article supplement (doi:10.3390/molecules27113571), 2022-06-02
Supplement: s1 [file s1]

# One-pot and catalyst-free transformation of *N*-protected 1-amino-1-ethoxyalkylphosphonates into bisphosphonic analogs of protein and non-protein $\alpha$ -amino acids

Anna Kuźnik<sup>1,2,\*</sup>, Dominika Kozicka<sup>1,2</sup>, Wioleta Hawranek<sup>1</sup>, Karolina Socha<sup>1</sup> and Karol Erfurt<sup>3</sup>

<sup>1</sup> Department of Organic Chemistry, Bioorganic Chemistry and Biotechnology, Silesian University of Technology, B. Krzywoustego 4, 44-100 Gliwice, Poland.

<sup>2</sup> Biotechnology Center of Silesian University of Technology, B. Krzywoustego 8, 44-100 Gliwice, Poland.

<sup>3</sup> Department of Chemical Organic Technology and Petrochemistry, Silesian University of Technology, B. Krzywoustego 4, 44-100 Gliwice, Poland

\* Corresponding author. e-mail: [anna.kuznik@polsl.pl](mailto:anna.kuznik@polsl.pl); Tel: +48 32 237 16 13; Fax: +48 32 237 20 94.

## Table of contents

1. <sup>1</sup>H, <sup>13</sup>C and <sup>31</sup>P NMR spectra of all 1-(*N*-acylamino)-1-ethoxyalkylphosphonates **3** (S2-S43);
2. <sup>1</sup>H, <sup>13</sup>C and <sup>31</sup>P NMR spectra of diethyl 1-(*N*-benzyloxycarbonylamino)-1-triphenylphosphoniummethylphosphonate **4c** (S44-S46);
3. <sup>1</sup>H, <sup>13</sup>C and <sup>31</sup>P NMR spectra of all 1-(*N*-acylamino)alkylene-1,1-bisphosphonates **5** (S44-S88).
4. Summary of characteristic <sup>13</sup>C NMR data for all 1-(*N*-acylamino)-1-ethoxyalkylphosphonates **3**, diethyl 1-(*N*-benzyloxycarbonylamino)-1-triphenylphosphoniummethylphosphonate **4c** and all 1-(*N*-acylamino)alkylene-1,1-bisphosphonates **5** (S47-S92).

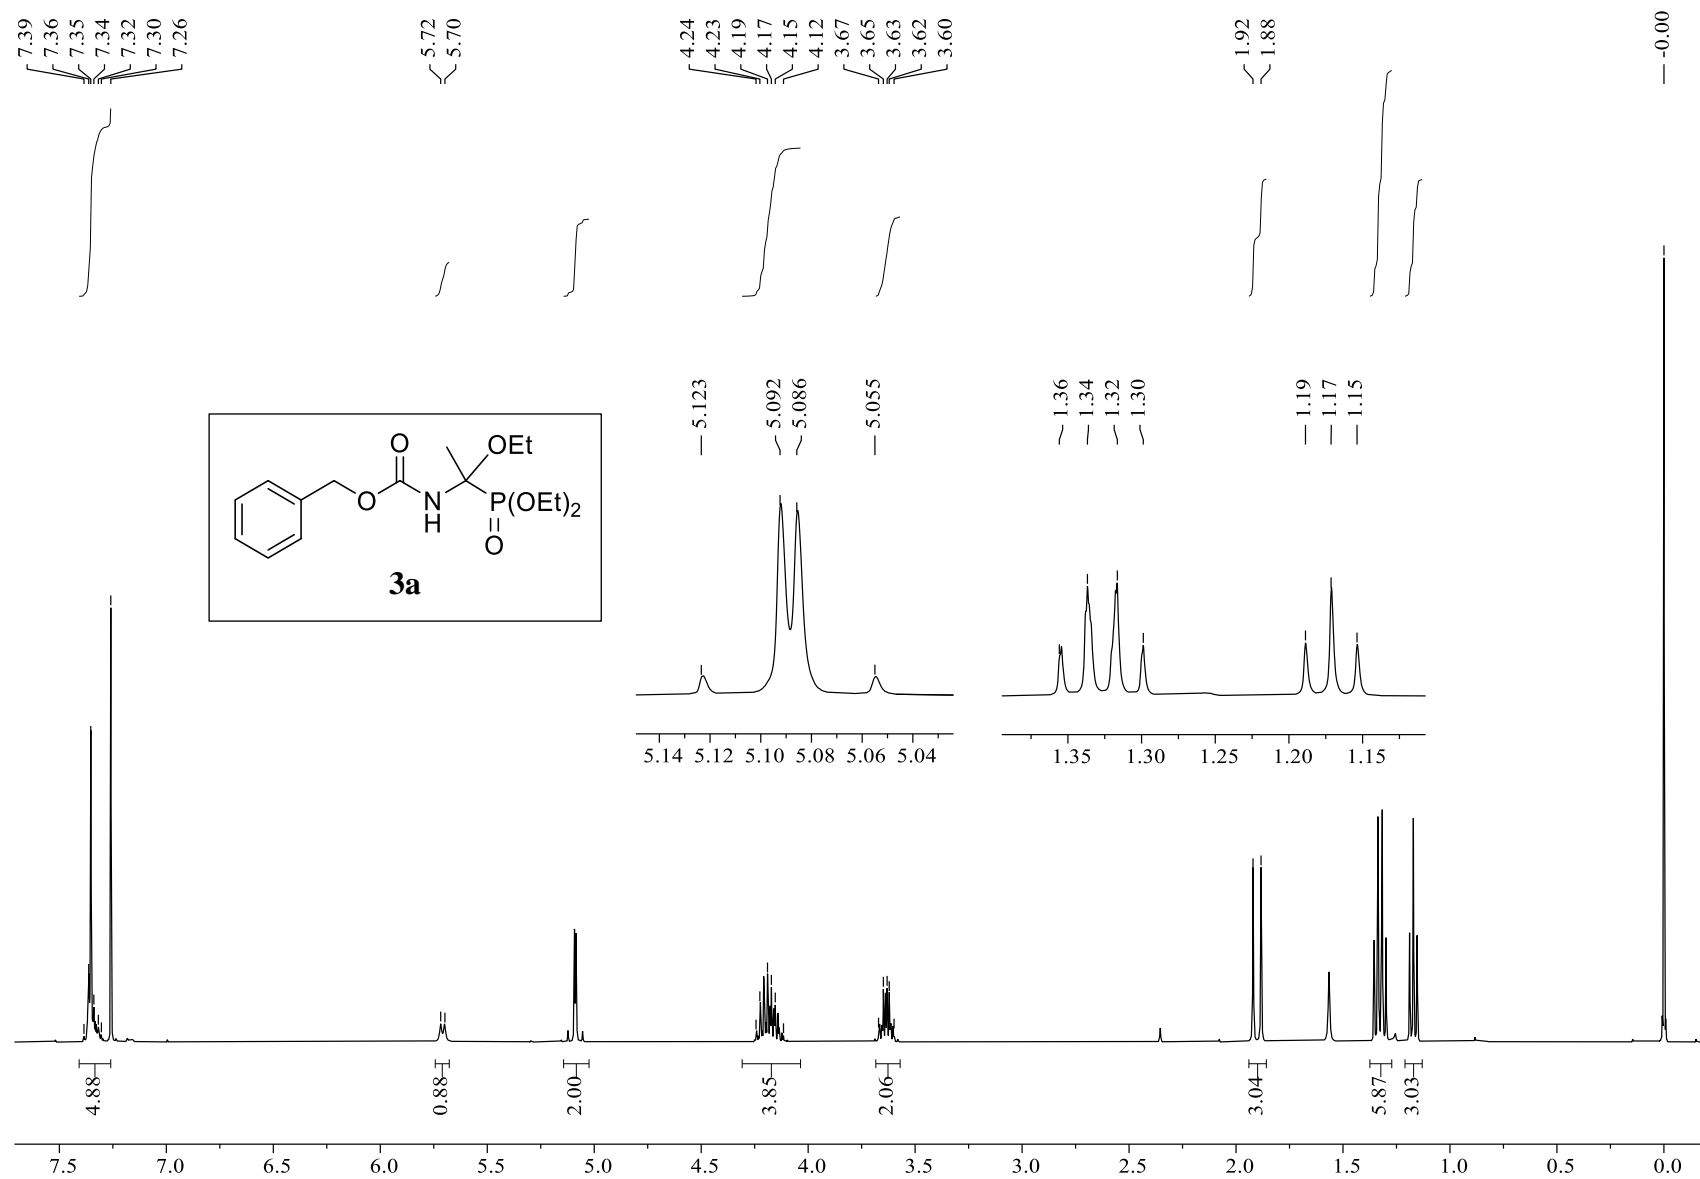

$^1\text{H}$  NMR spectrum of *diethyl 1-(N-benzyloxycarbonylamino)-1-ethoxyethylphosphonate (3a)*; 400 MHz/ $\text{CDCl}_3$ /TMS;  $\delta$  (ppm).

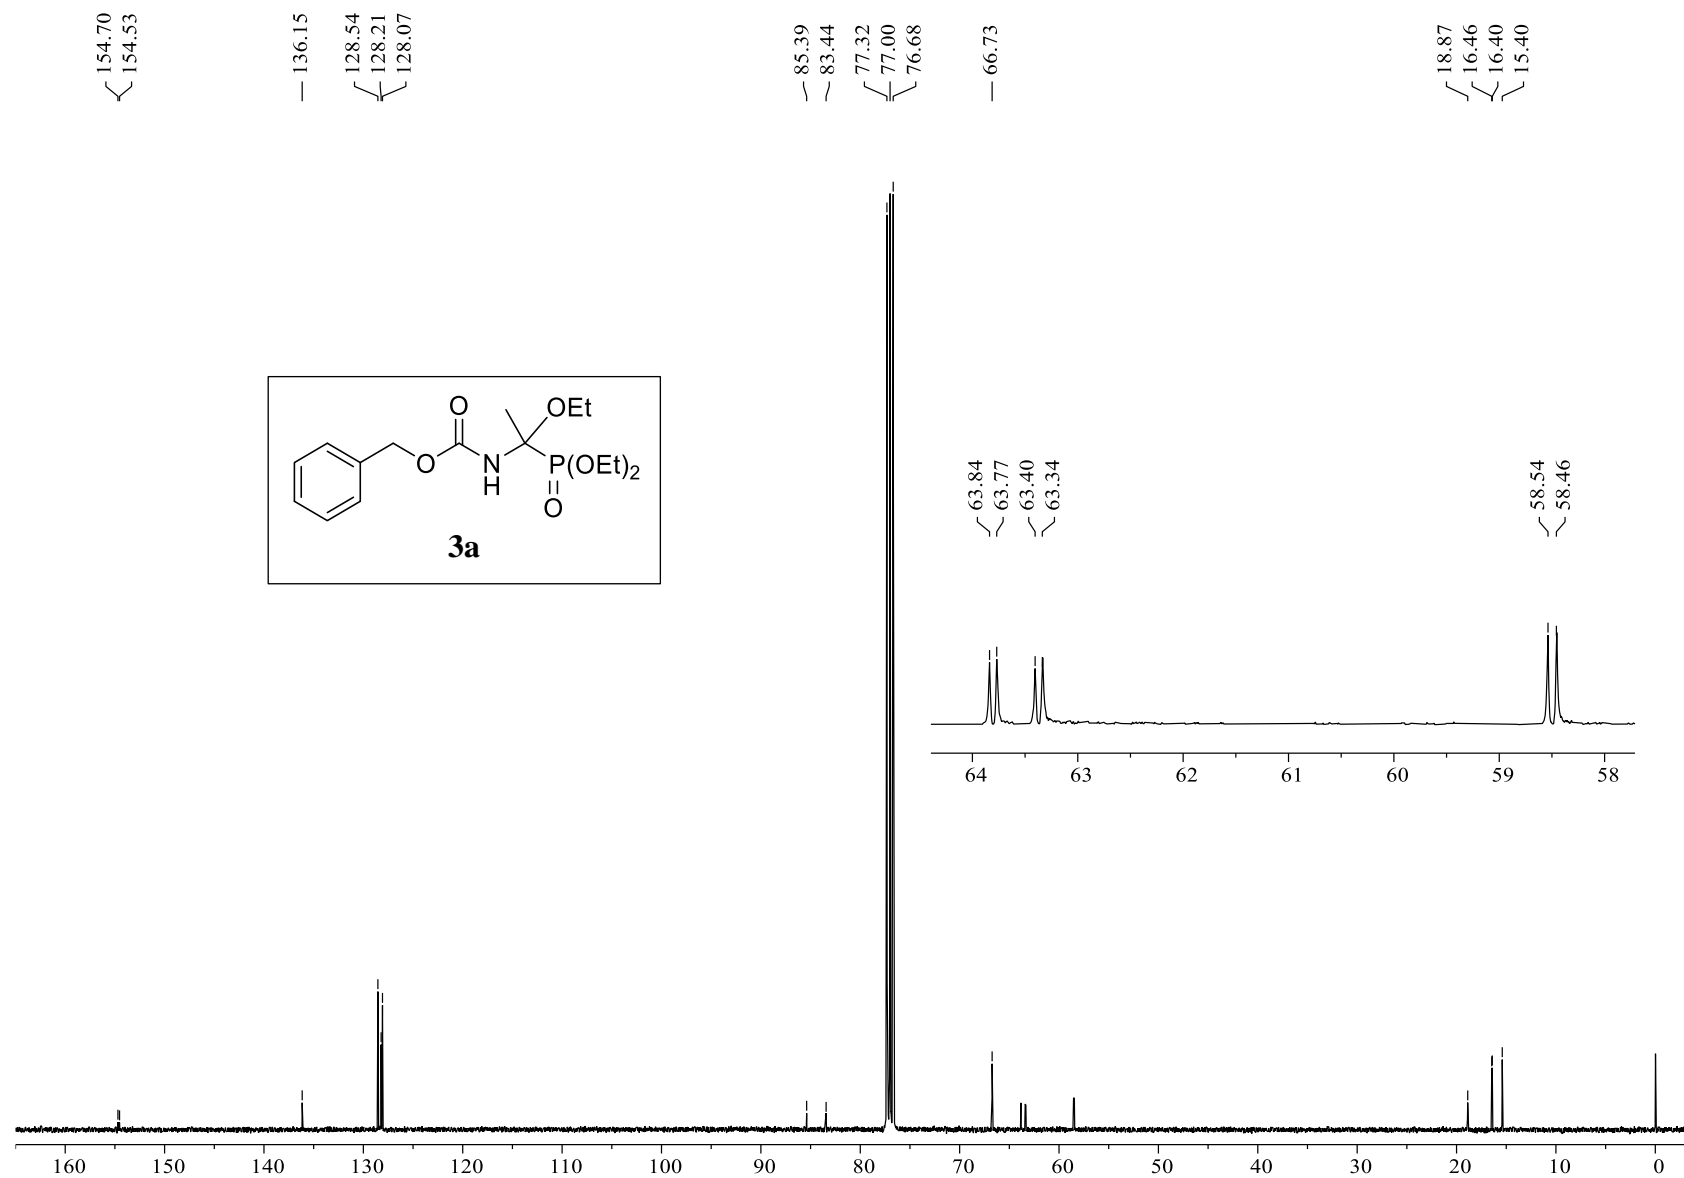

<sup>13</sup>C NMR spectrum of *diethyl 1-(N-benzyloxycarbonylamino)-1-ethoxyethylphosphonate (3a)*; 100 MHz/CDCl<sub>3</sub>/TMS; δ (ppm).

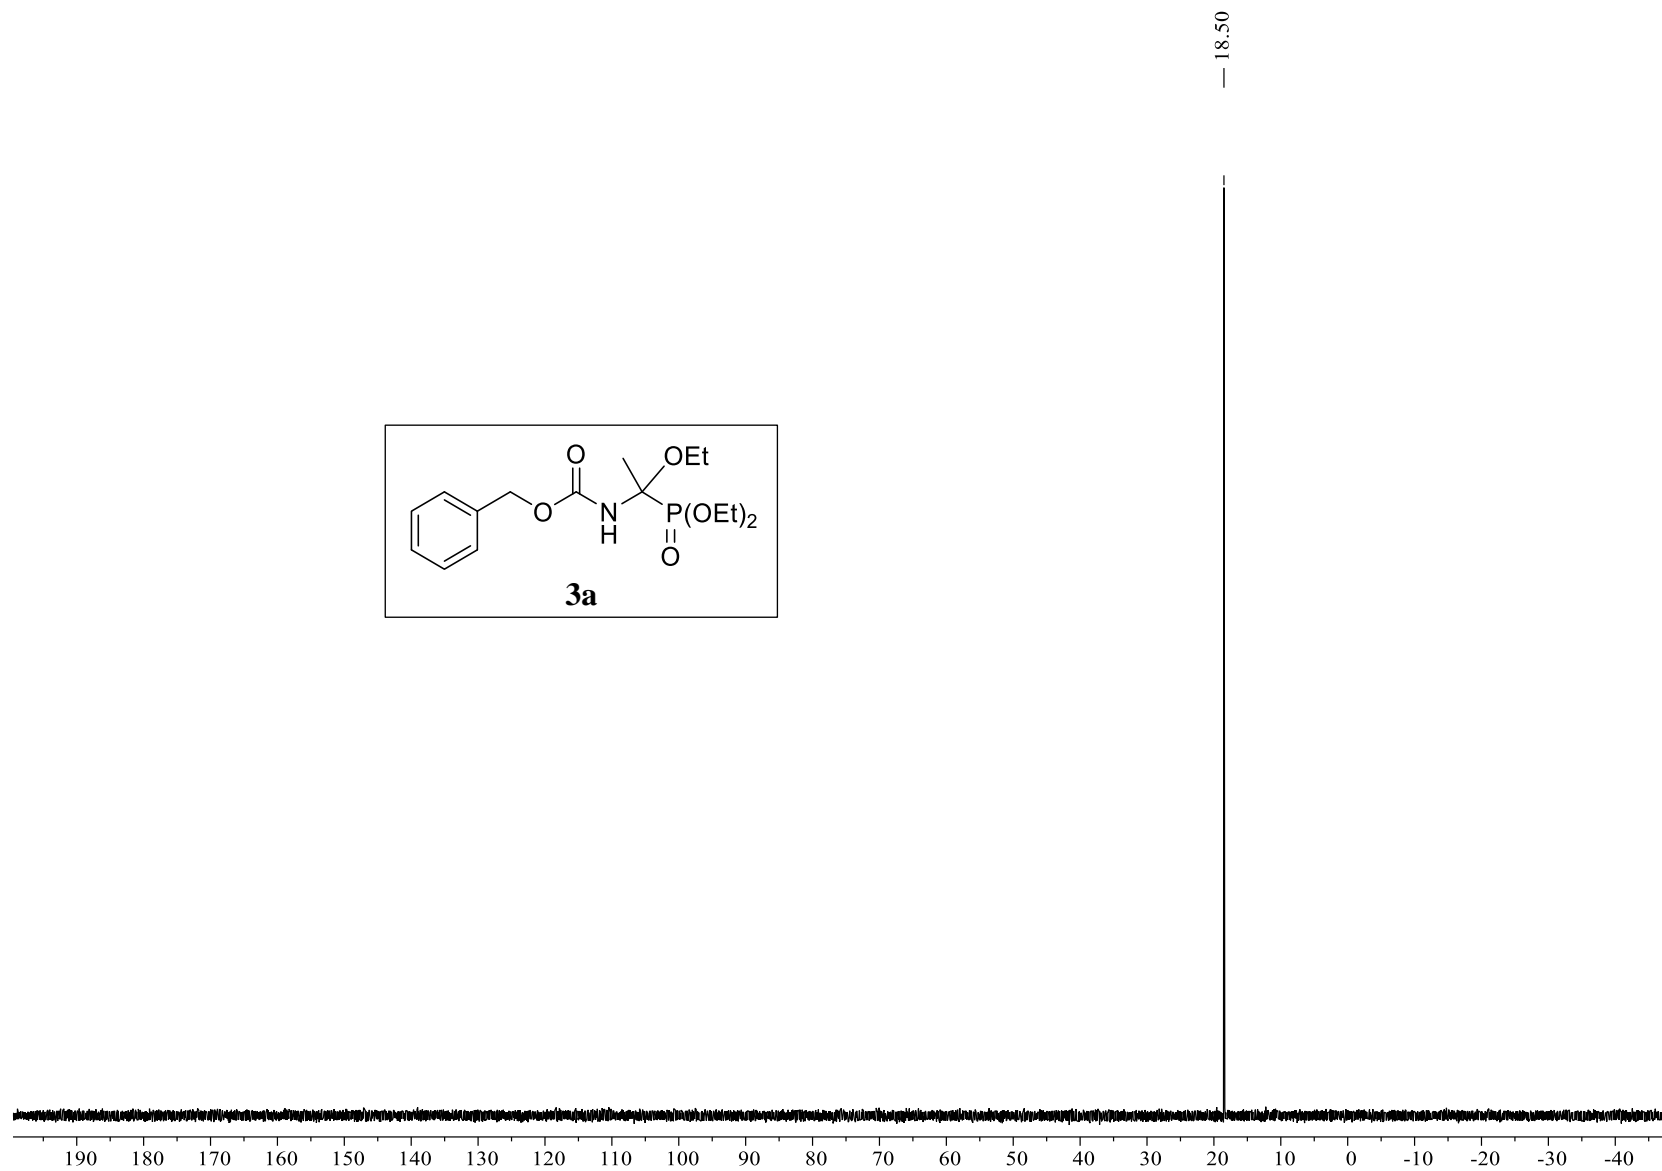

$^{31}\text{P}$  NMR spectrum of *diethyl 1-(N-benzyloxycarbonylamino)-1-ethoxyethylphosphonate* (**3a**); 162 MHz/ $\text{CDCl}_3$ /TMS;  $\delta$  (ppm).



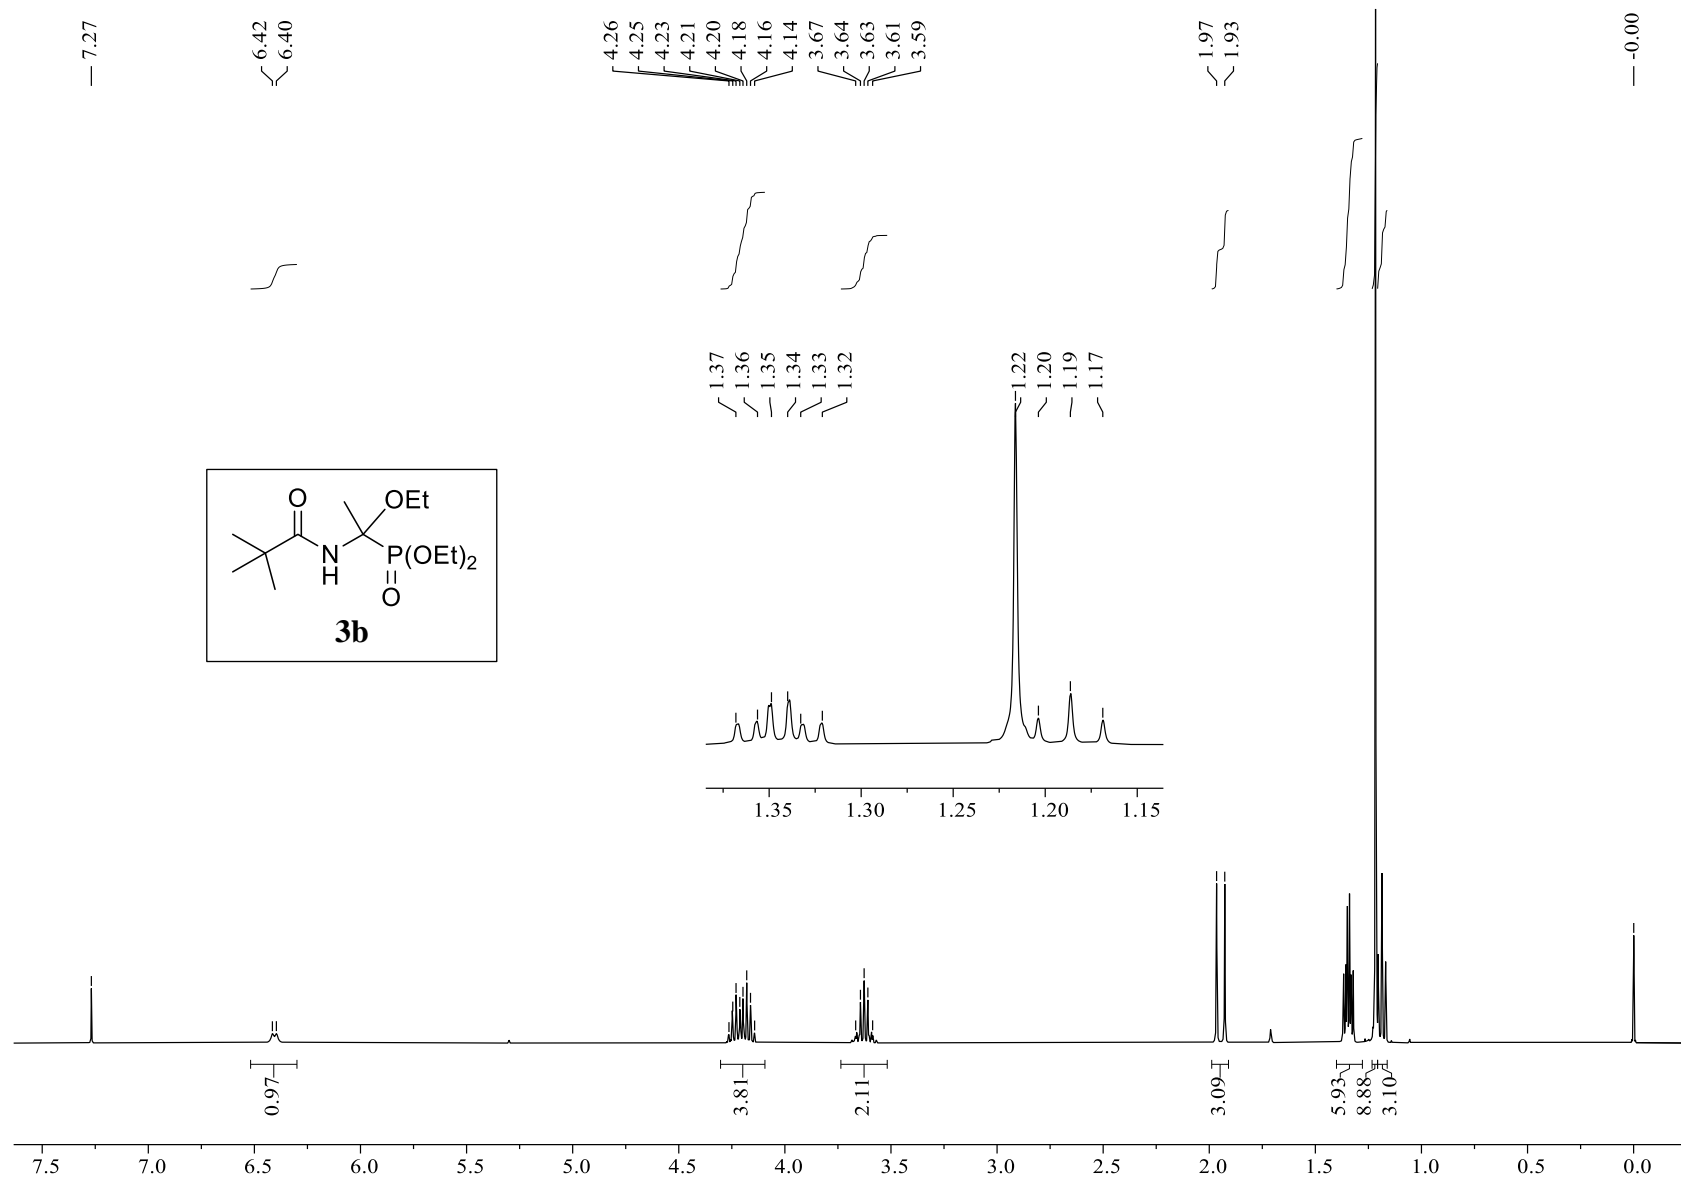

<sup>1</sup>H NMR spectrum of *diethyl 1-(N-pivaloylamino)-1-ethoxyethylphosphonate (3b)*; 400 MHz/CDCl<sub>3</sub>/TMS; δ (ppm).

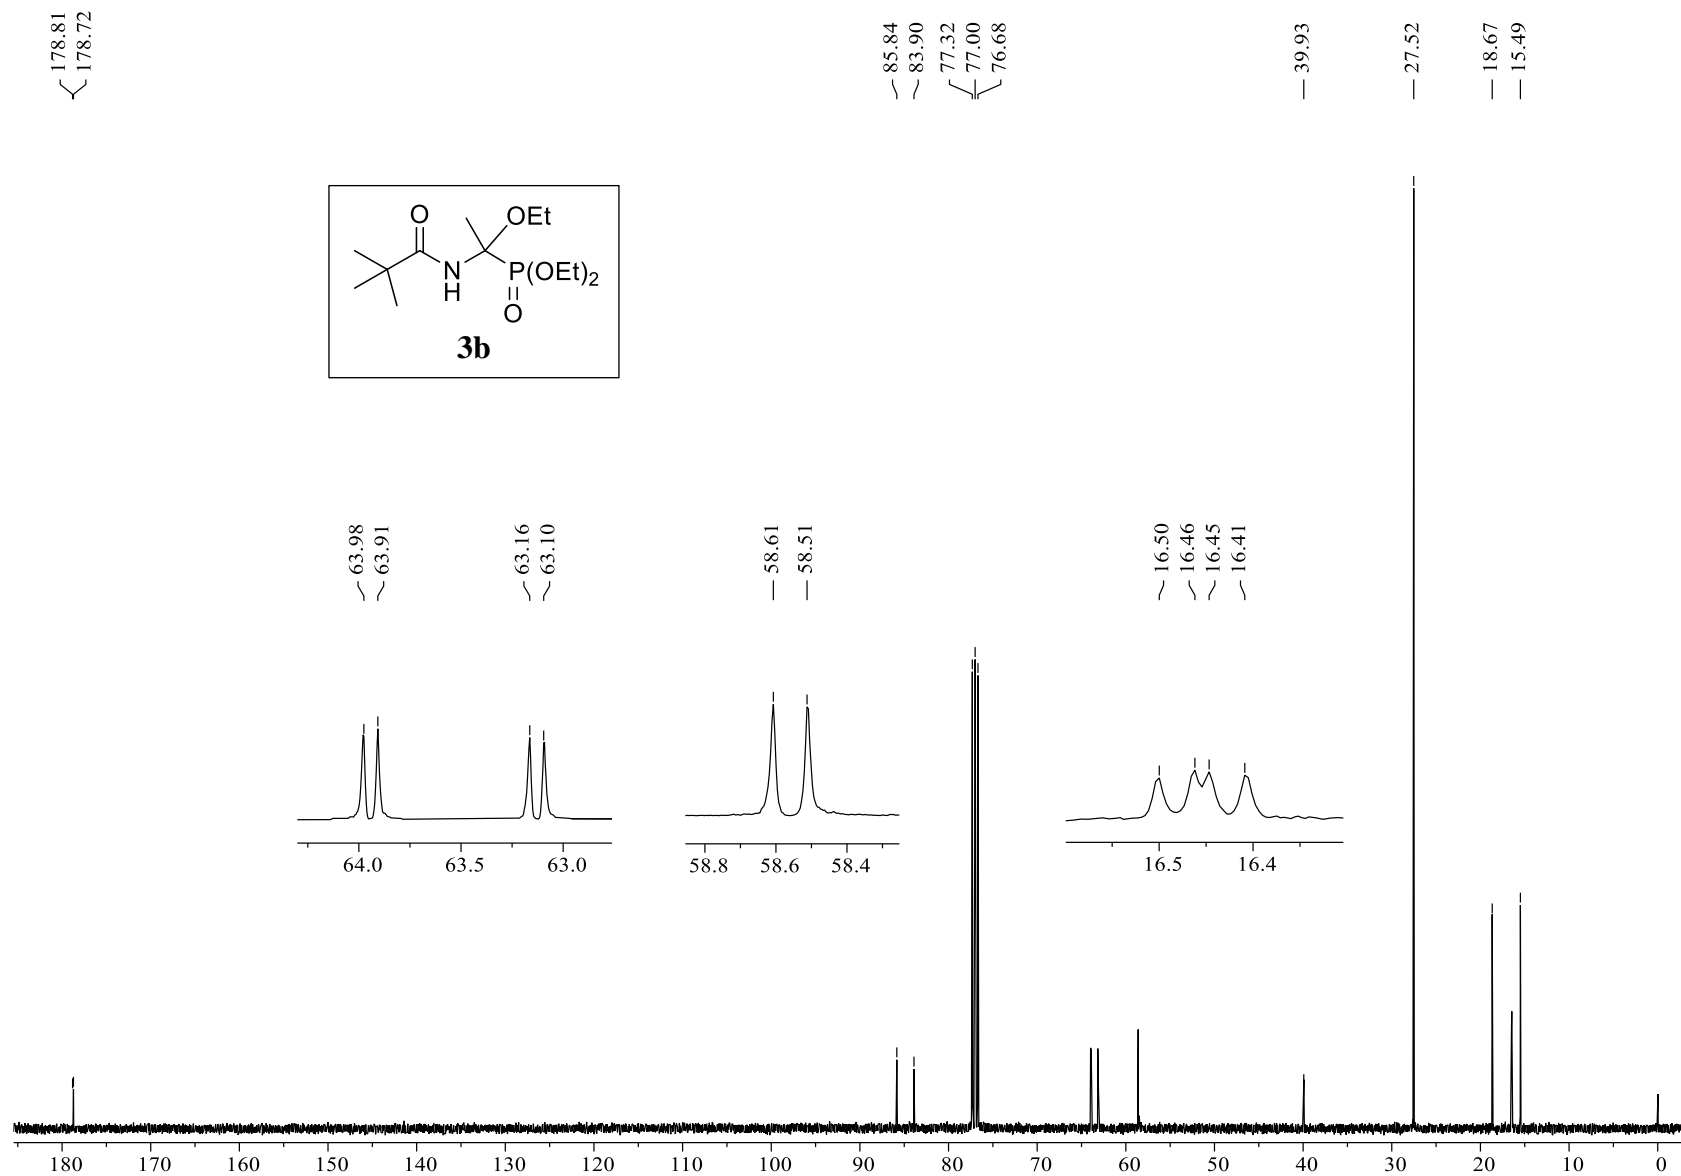

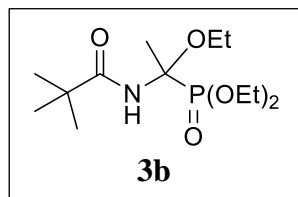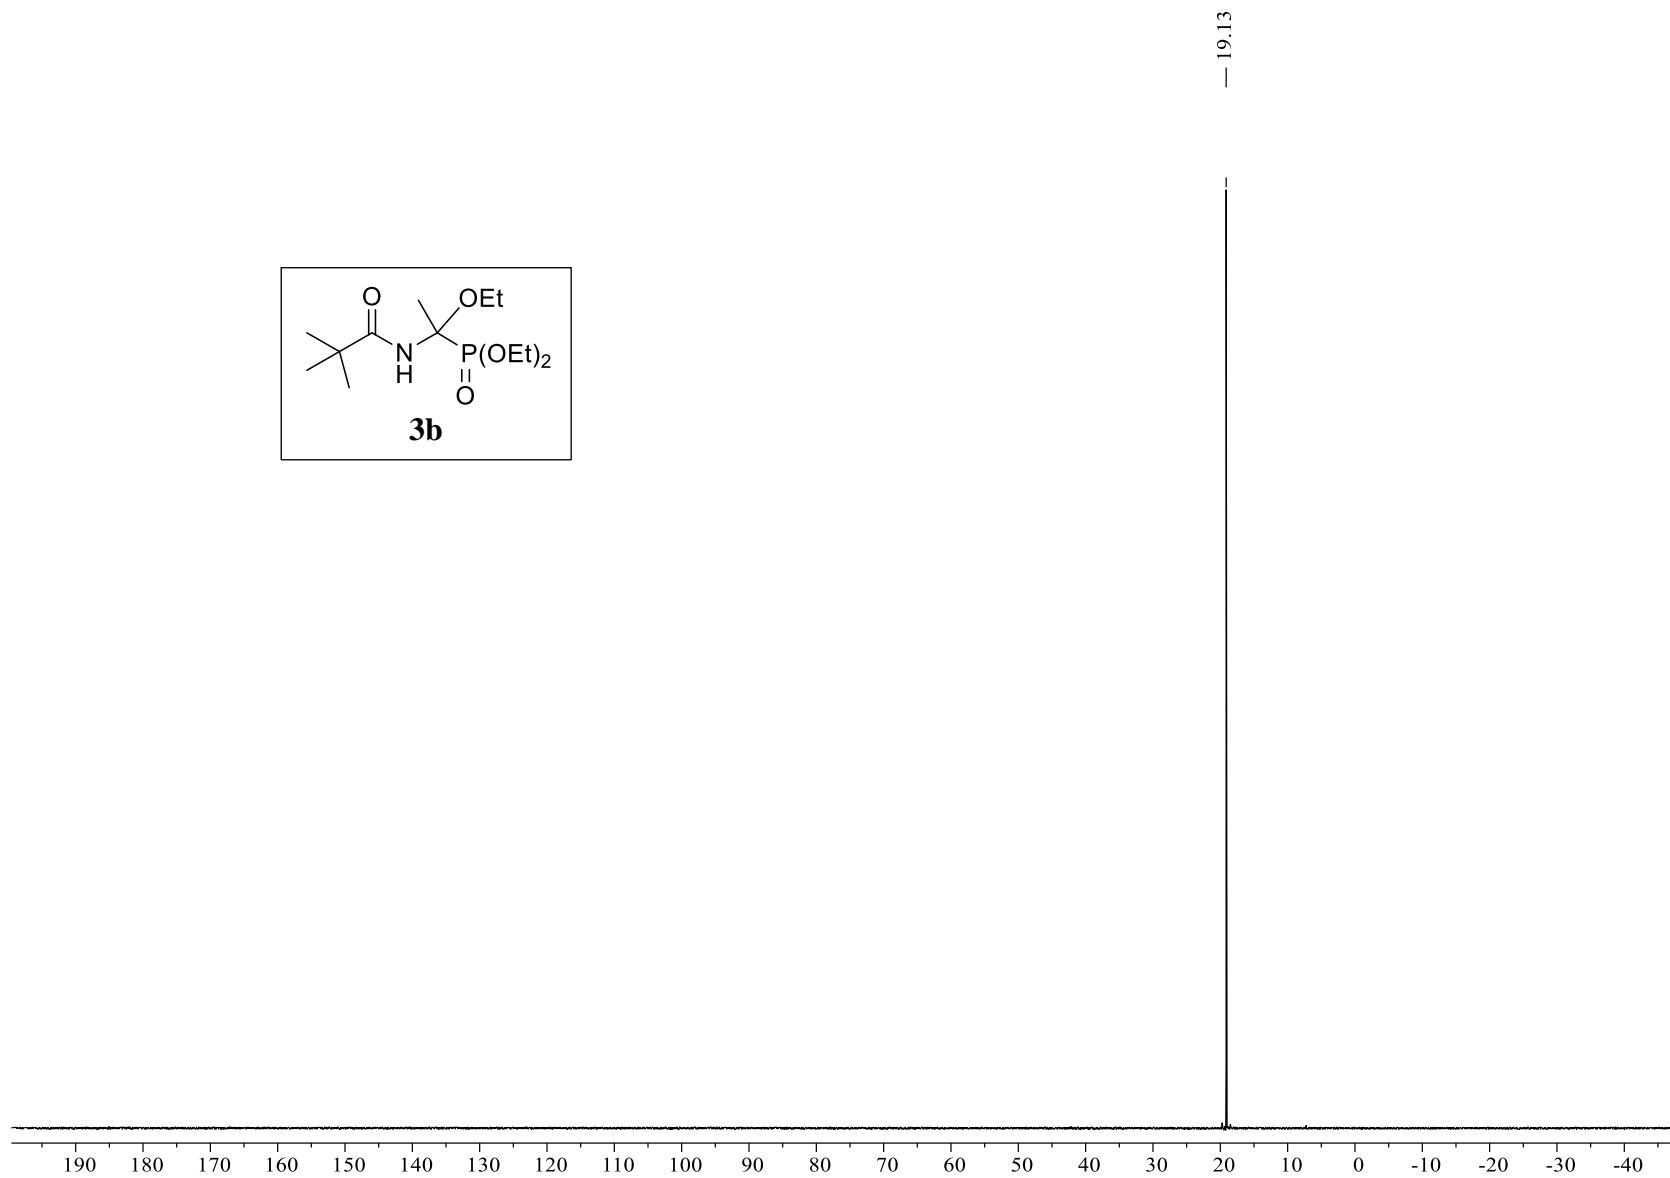

$^{31}\text{P}$  NMR spectrum of *diethyl 1-(N-pivaloylamino)-1-ethoxyethylphosphonate (3b)*; 162 MHz/ $\text{CDCl}_3$ /TMS;  $\delta$  (ppm).

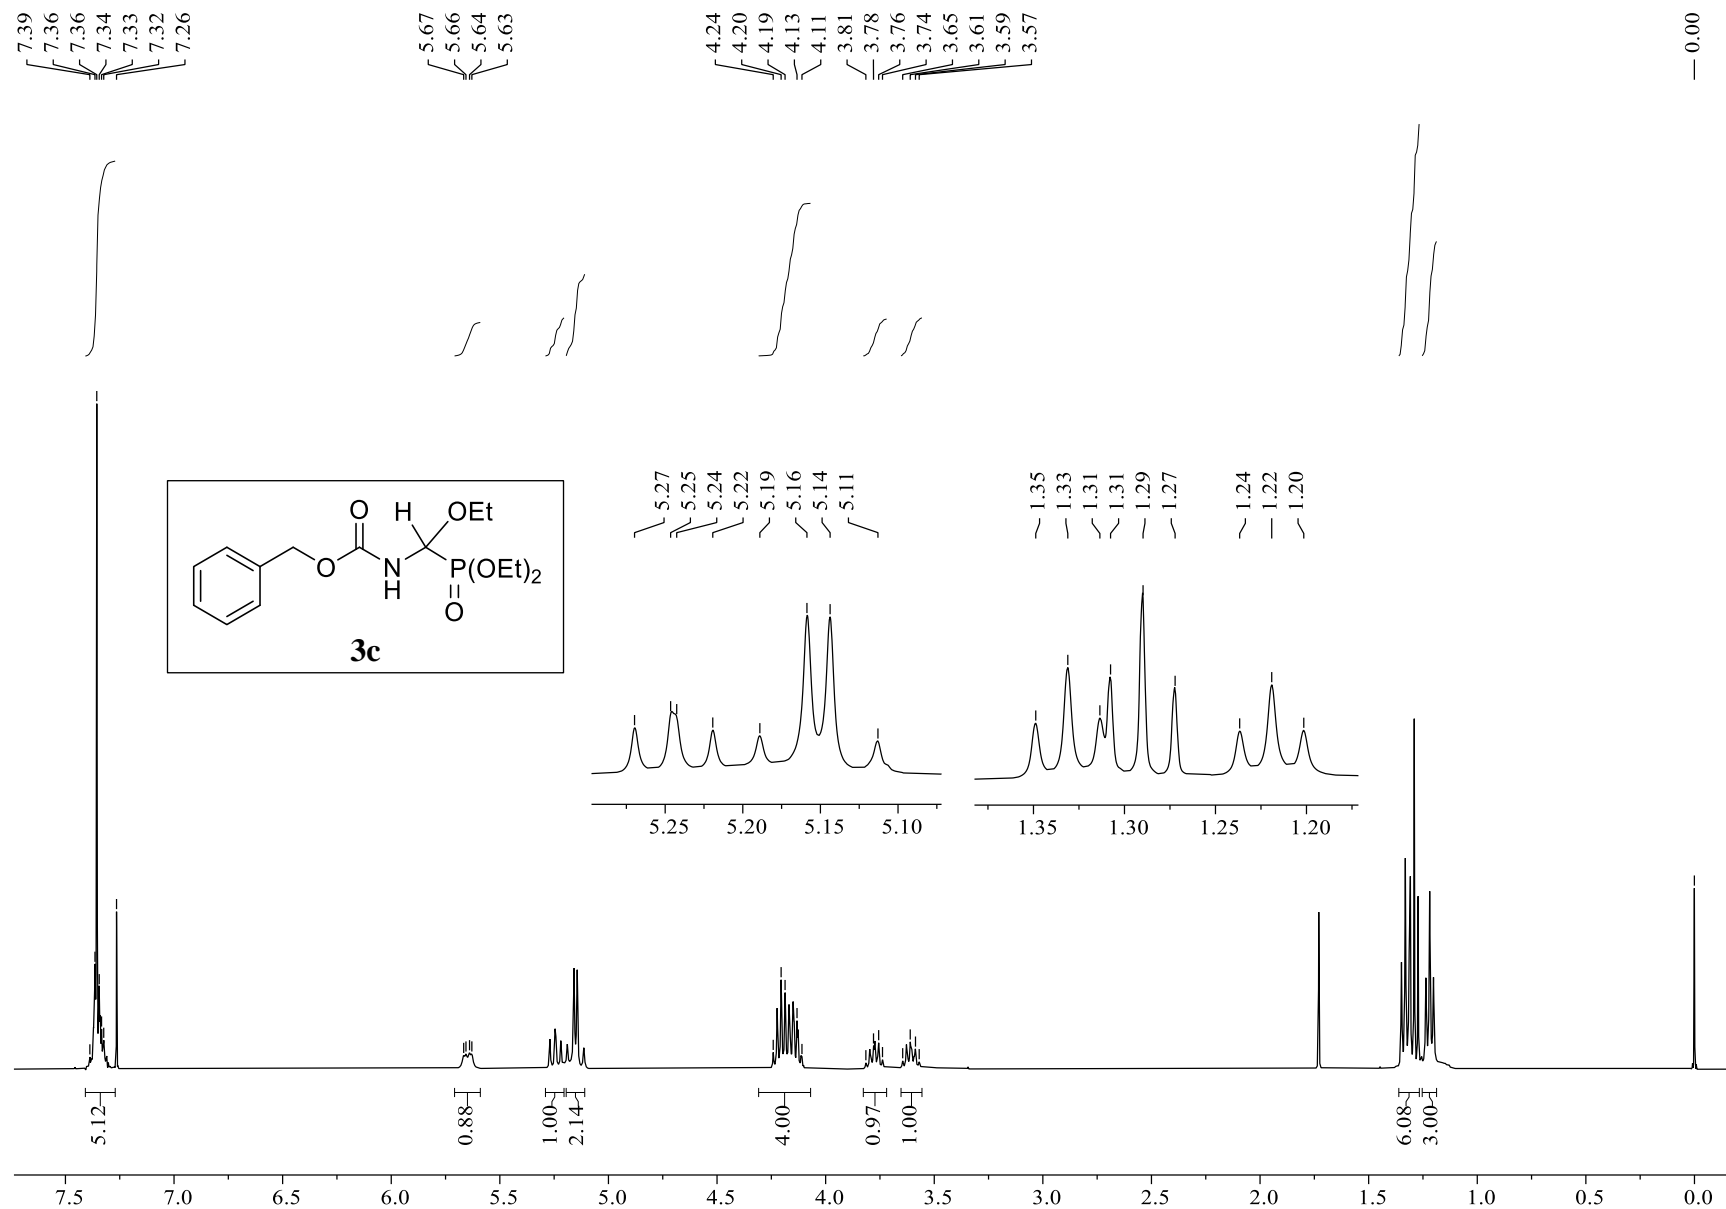

<sup>1</sup>H NMR spectrum of *diethyl 1-(N-benzyloxycarbonylamino)-1-ethoxymethylphosphonate (3c)*; 400 MHz/CDCl<sub>3</sub>/TMS; δ (ppm).

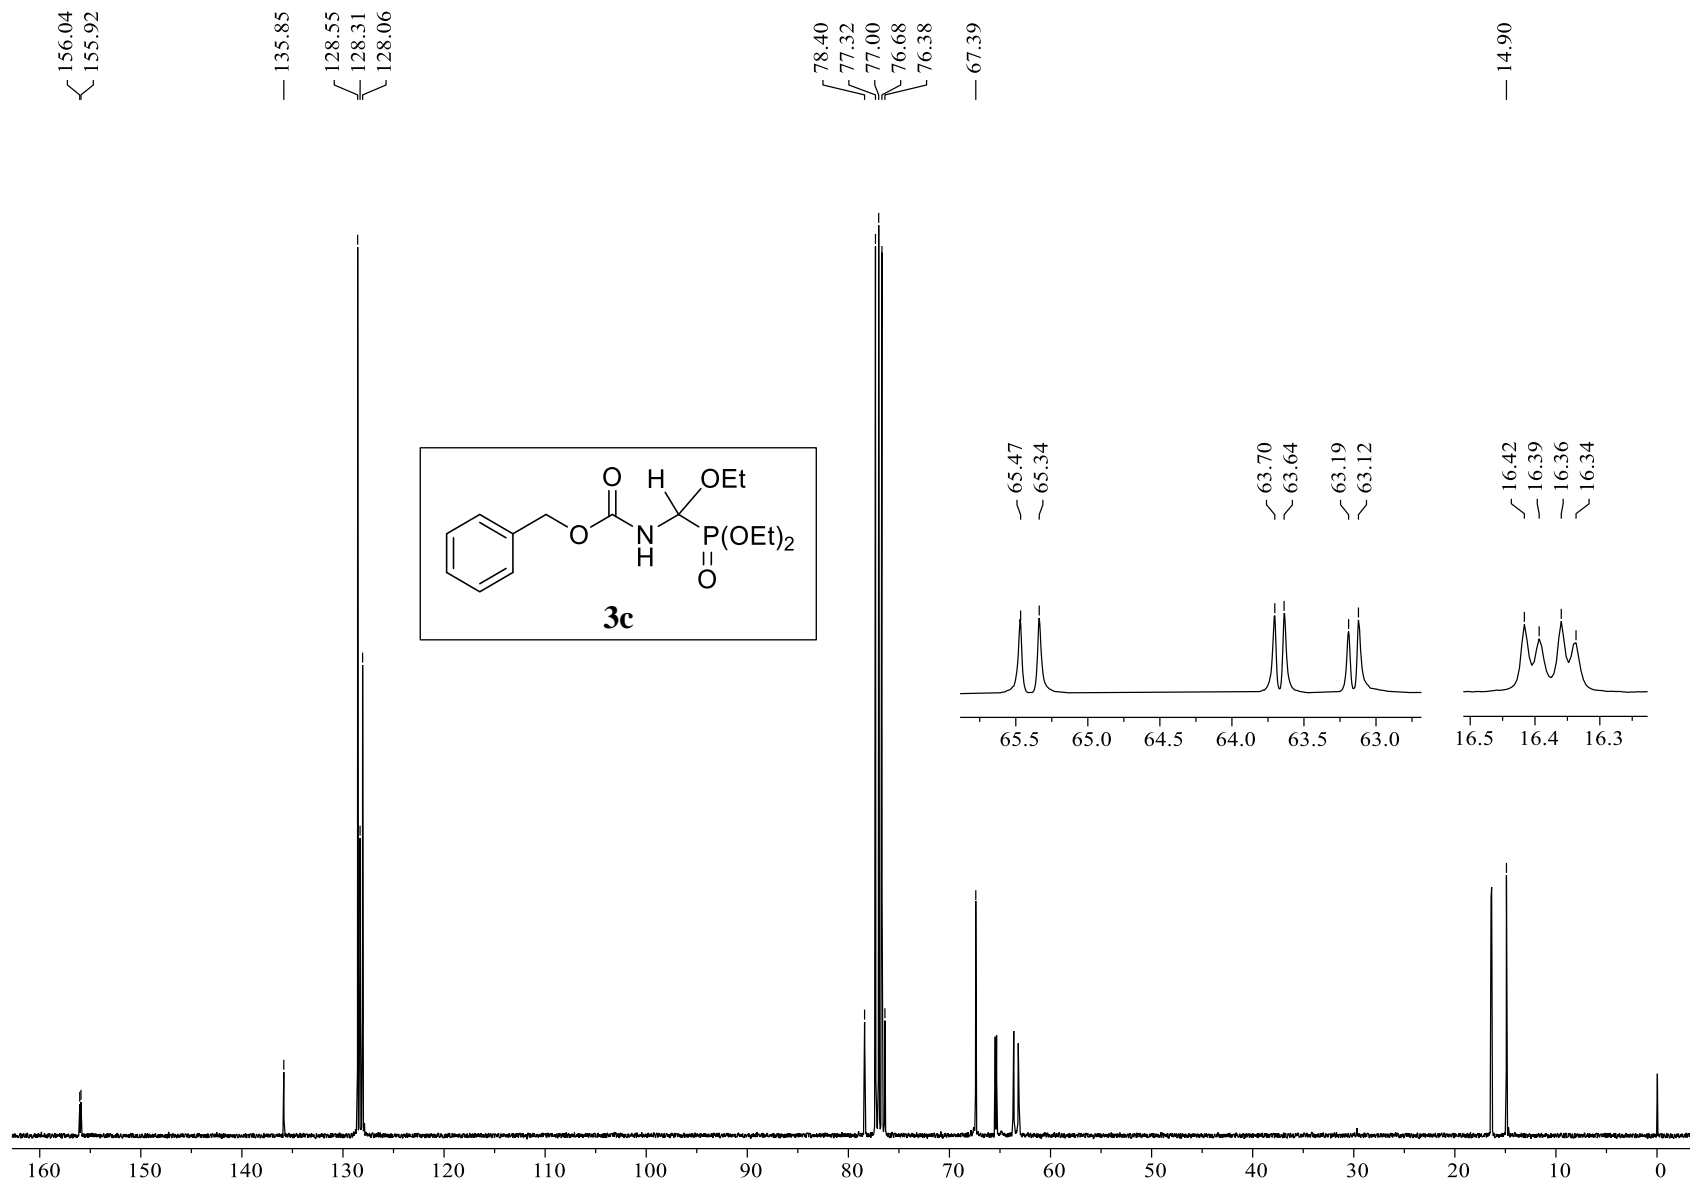

<sup>13</sup>C NMR spectrum of *diethyl 1-(N-benzyloxycarbonylamino)-1-ethoxymethylphosphonate (3c)*; 100 MHz/CDCl<sub>3</sub>/TMS; δ (ppm).

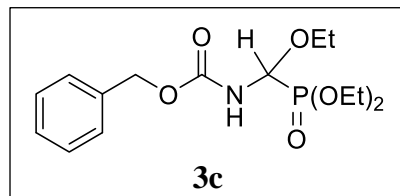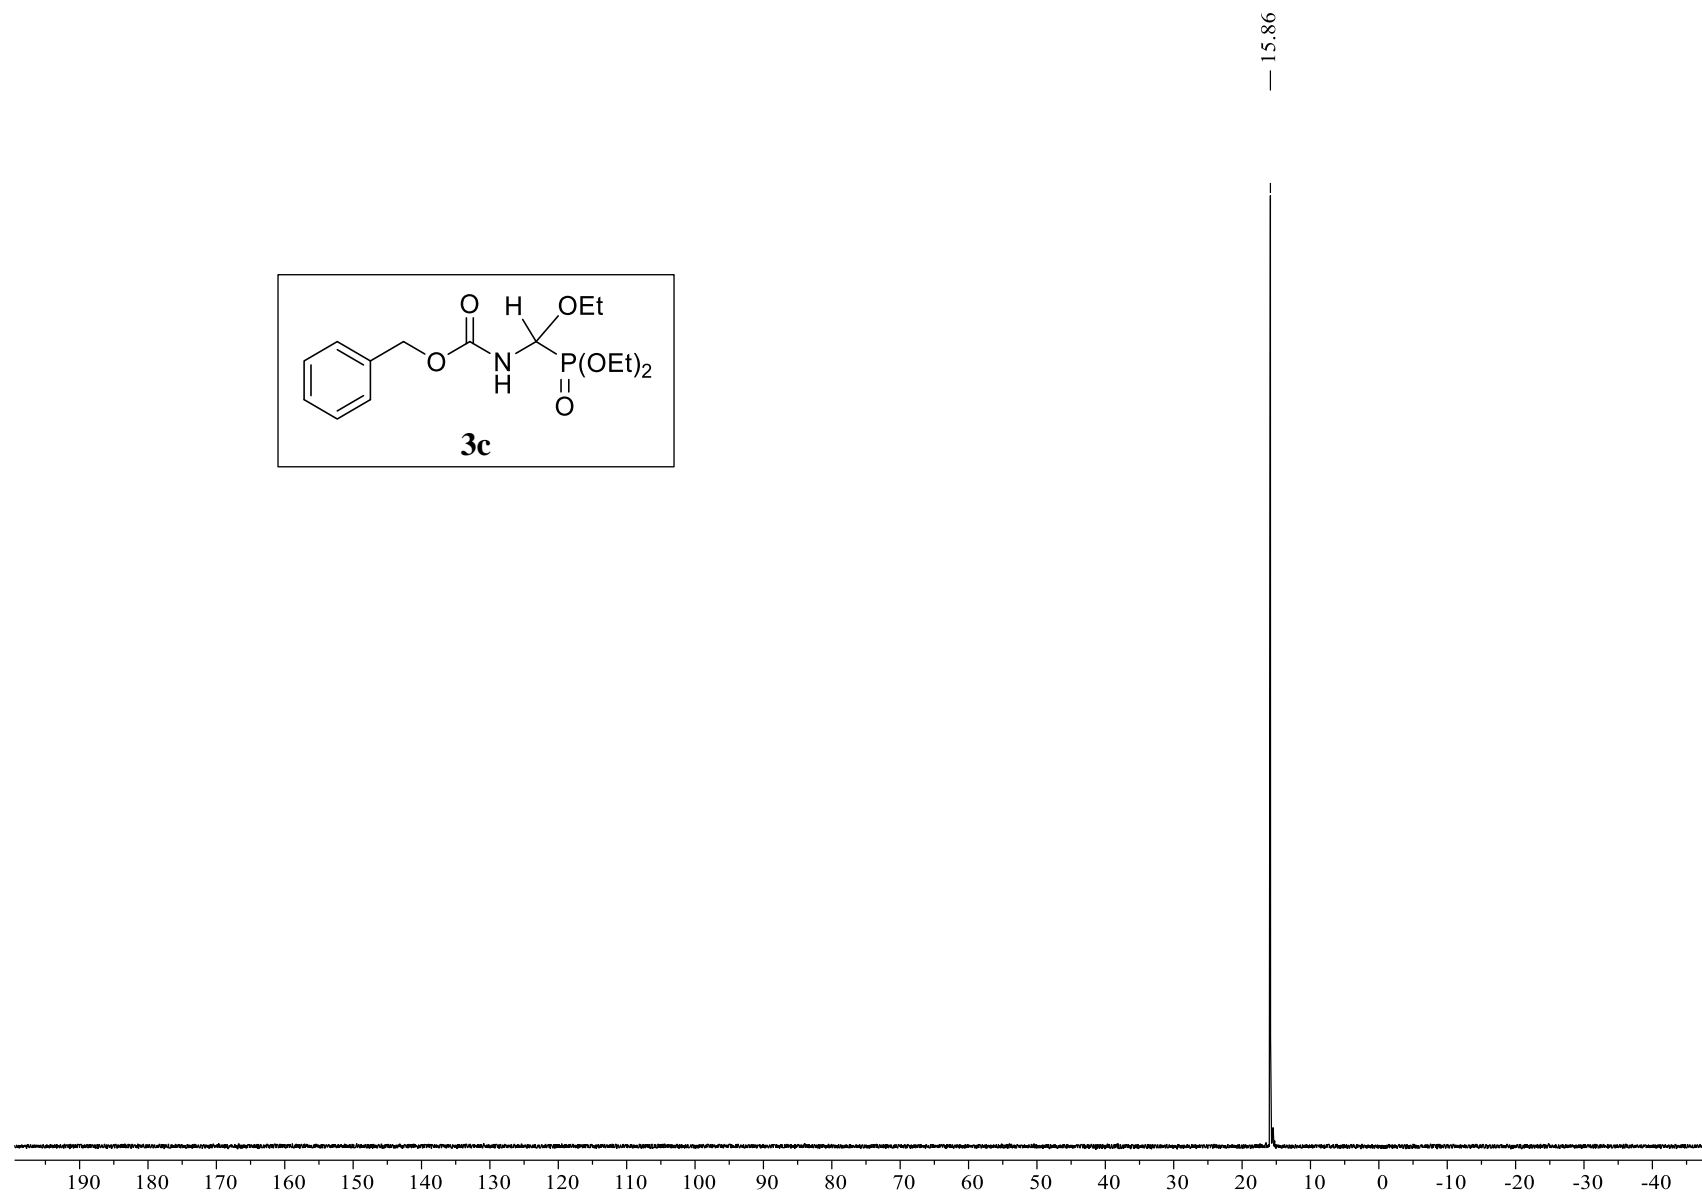

$^{31}\text{P}$  NMR spectrum of *diethyl 1-(N-benzyloxycarbonylamino)-1-ethoxymethylphosphonate (3c)*; 162 MHz/ $\text{CDCl}_3/\text{TMS}$ ;  $\delta$  (ppm).

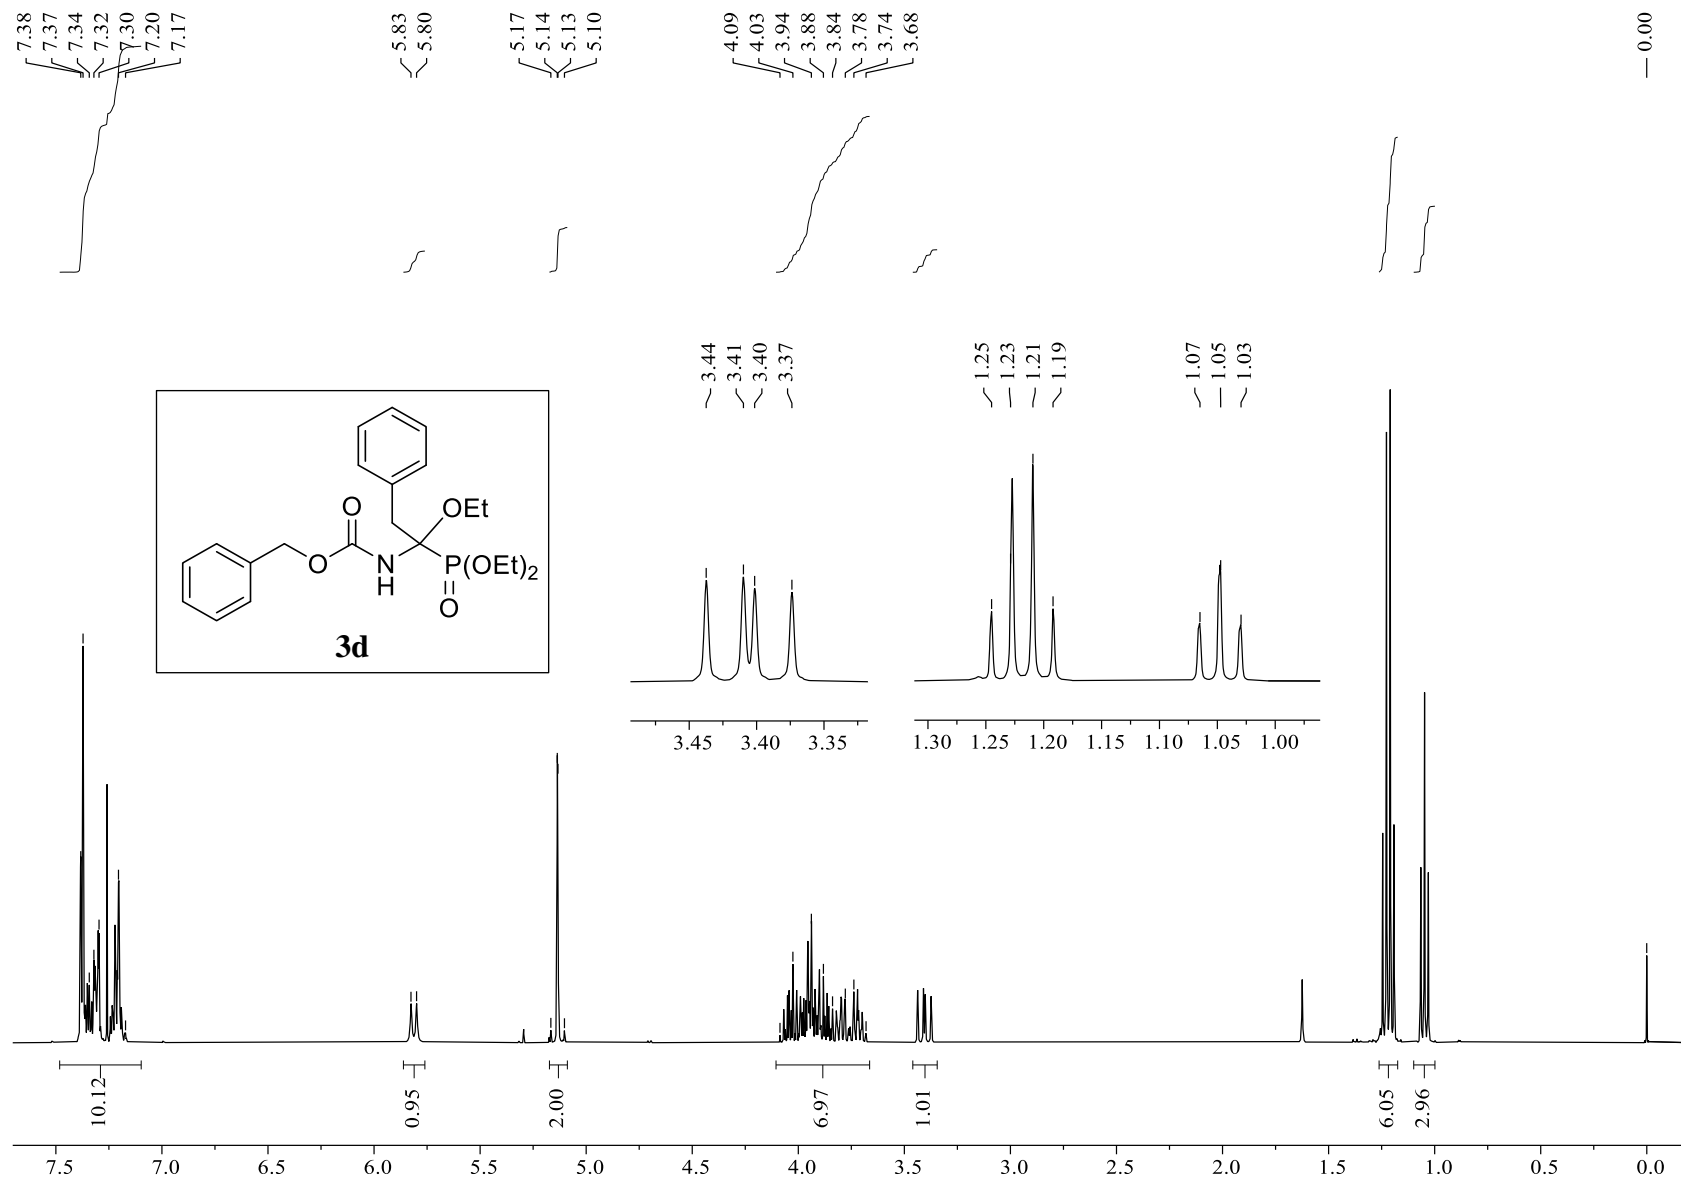

<sup>1</sup>H NMR spectrum of diethyl 1-(N-benzyloxycarbonylamino)-1-ethoxy-2-phenylethylphosphonate (**3d**); 400 MHz/CDCl<sub>3</sub>/TMS; δ (ppm).

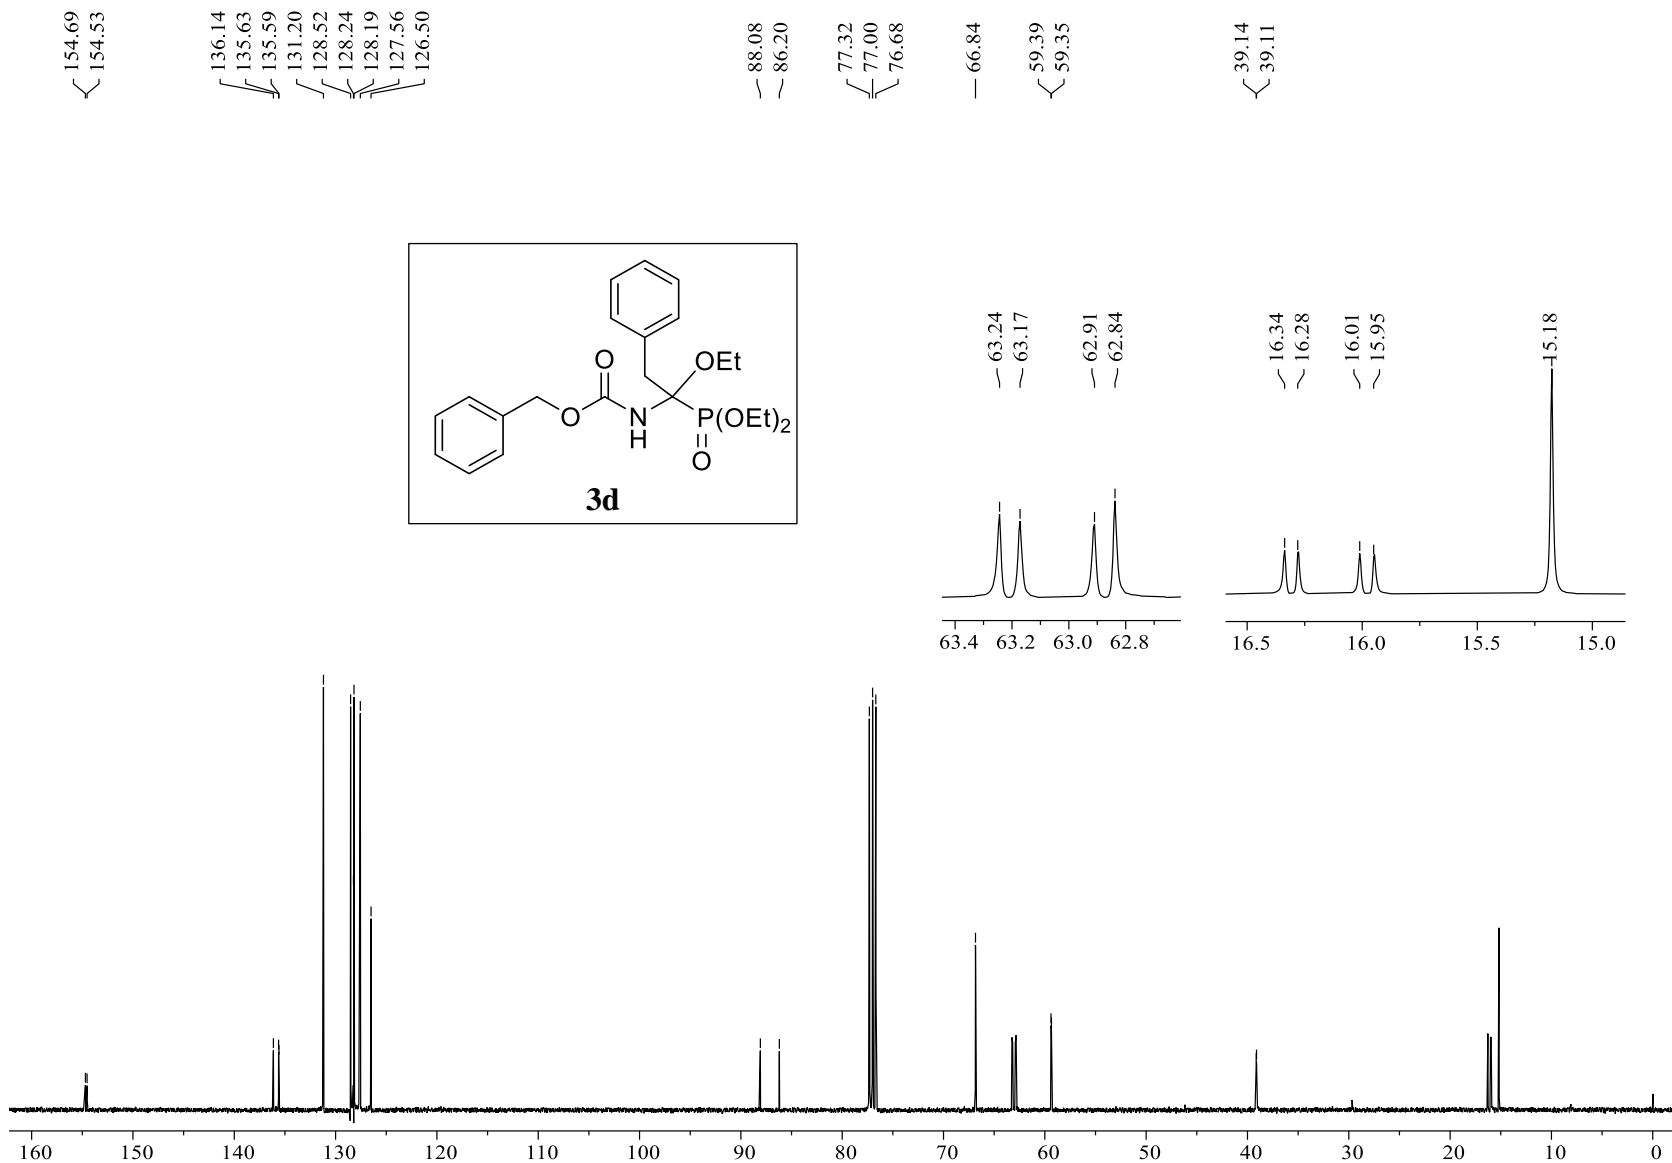

<sup>13</sup>C NMR spectrum of *diethyl 1-(N-benzyloxycarbonylamino)-1-ethoxy-2-phenylethylphosphonate (3d)*; 100 MHz/CDCl<sub>3</sub>/TMS; δ (ppm).



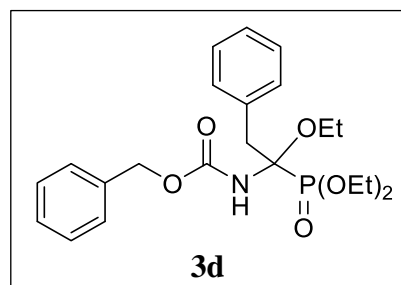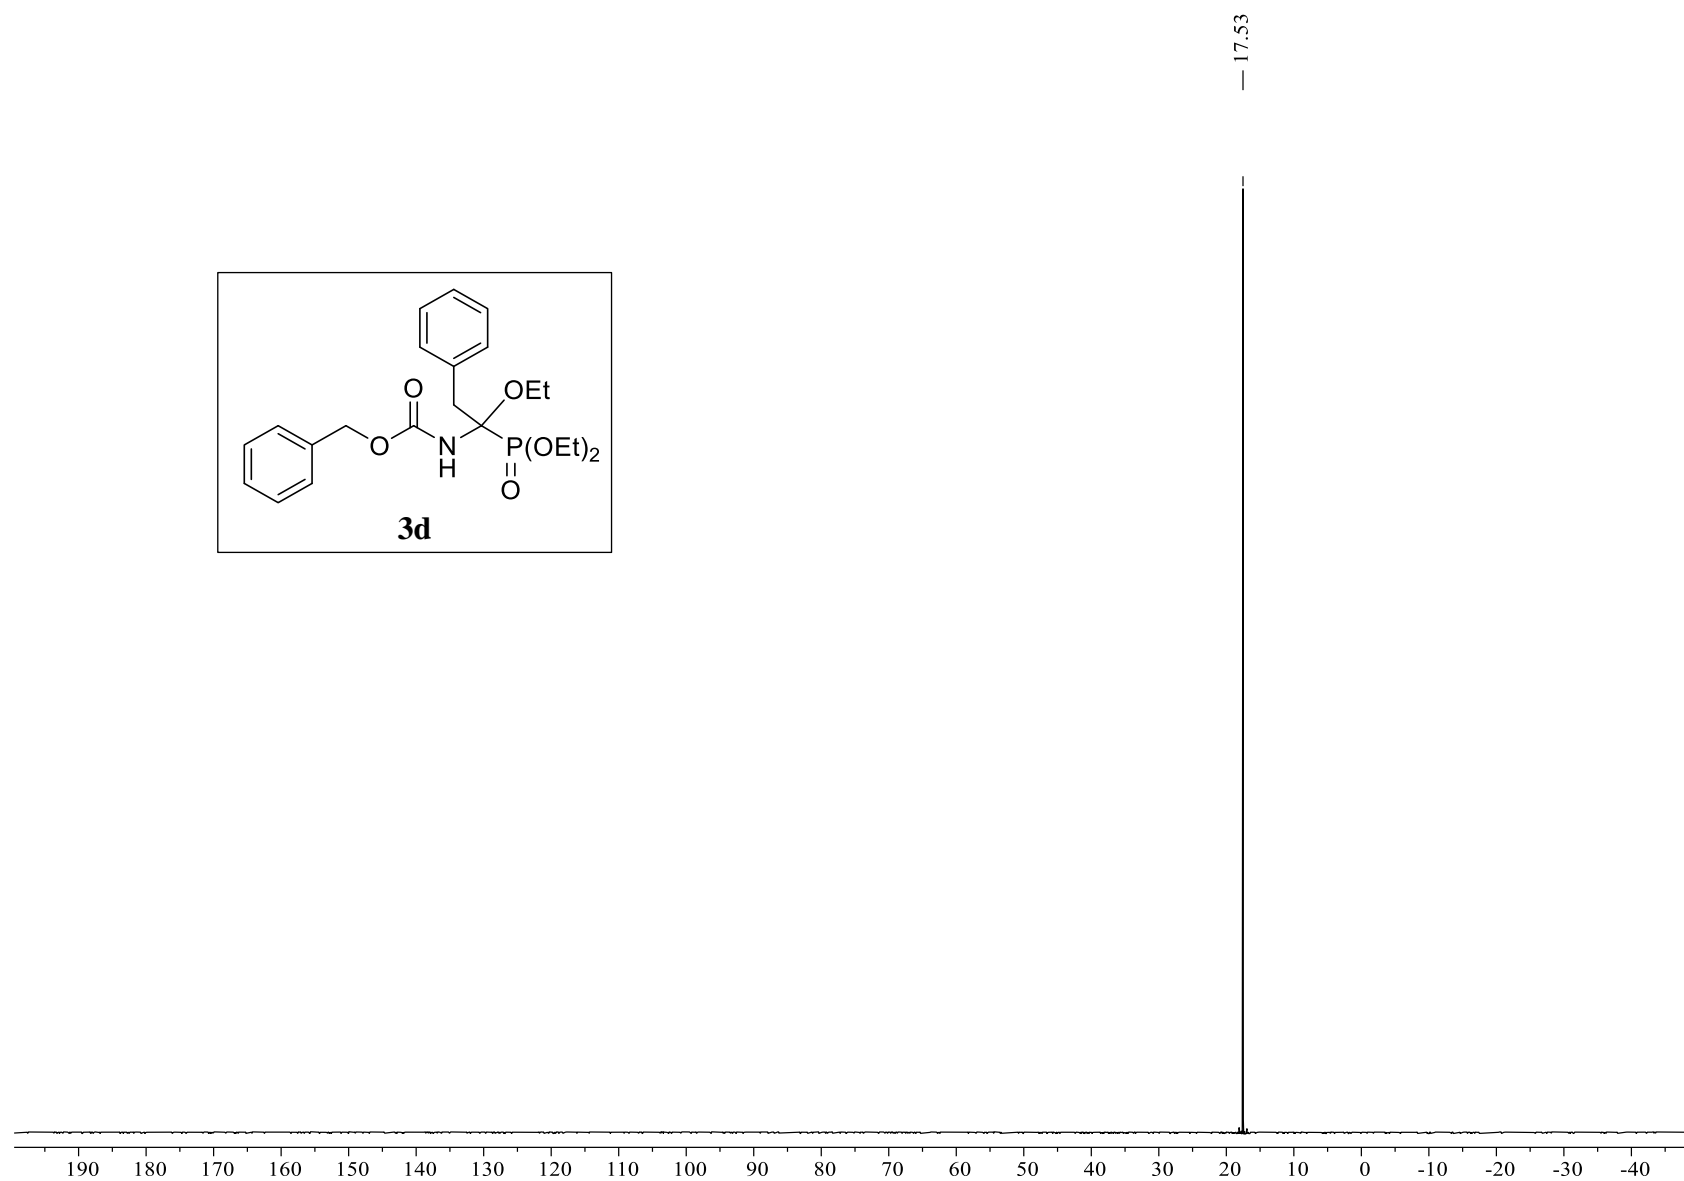

$^{31}\text{P}$  NMR spectrum of *diethyl 1-(N-benzoyloxycarbonylamino)-1-ethoxy-2-phenylethylphosphonate (3d)*; 162 MHz/ $\text{CDCl}_3$ /TMS;  $\delta$  (ppm).

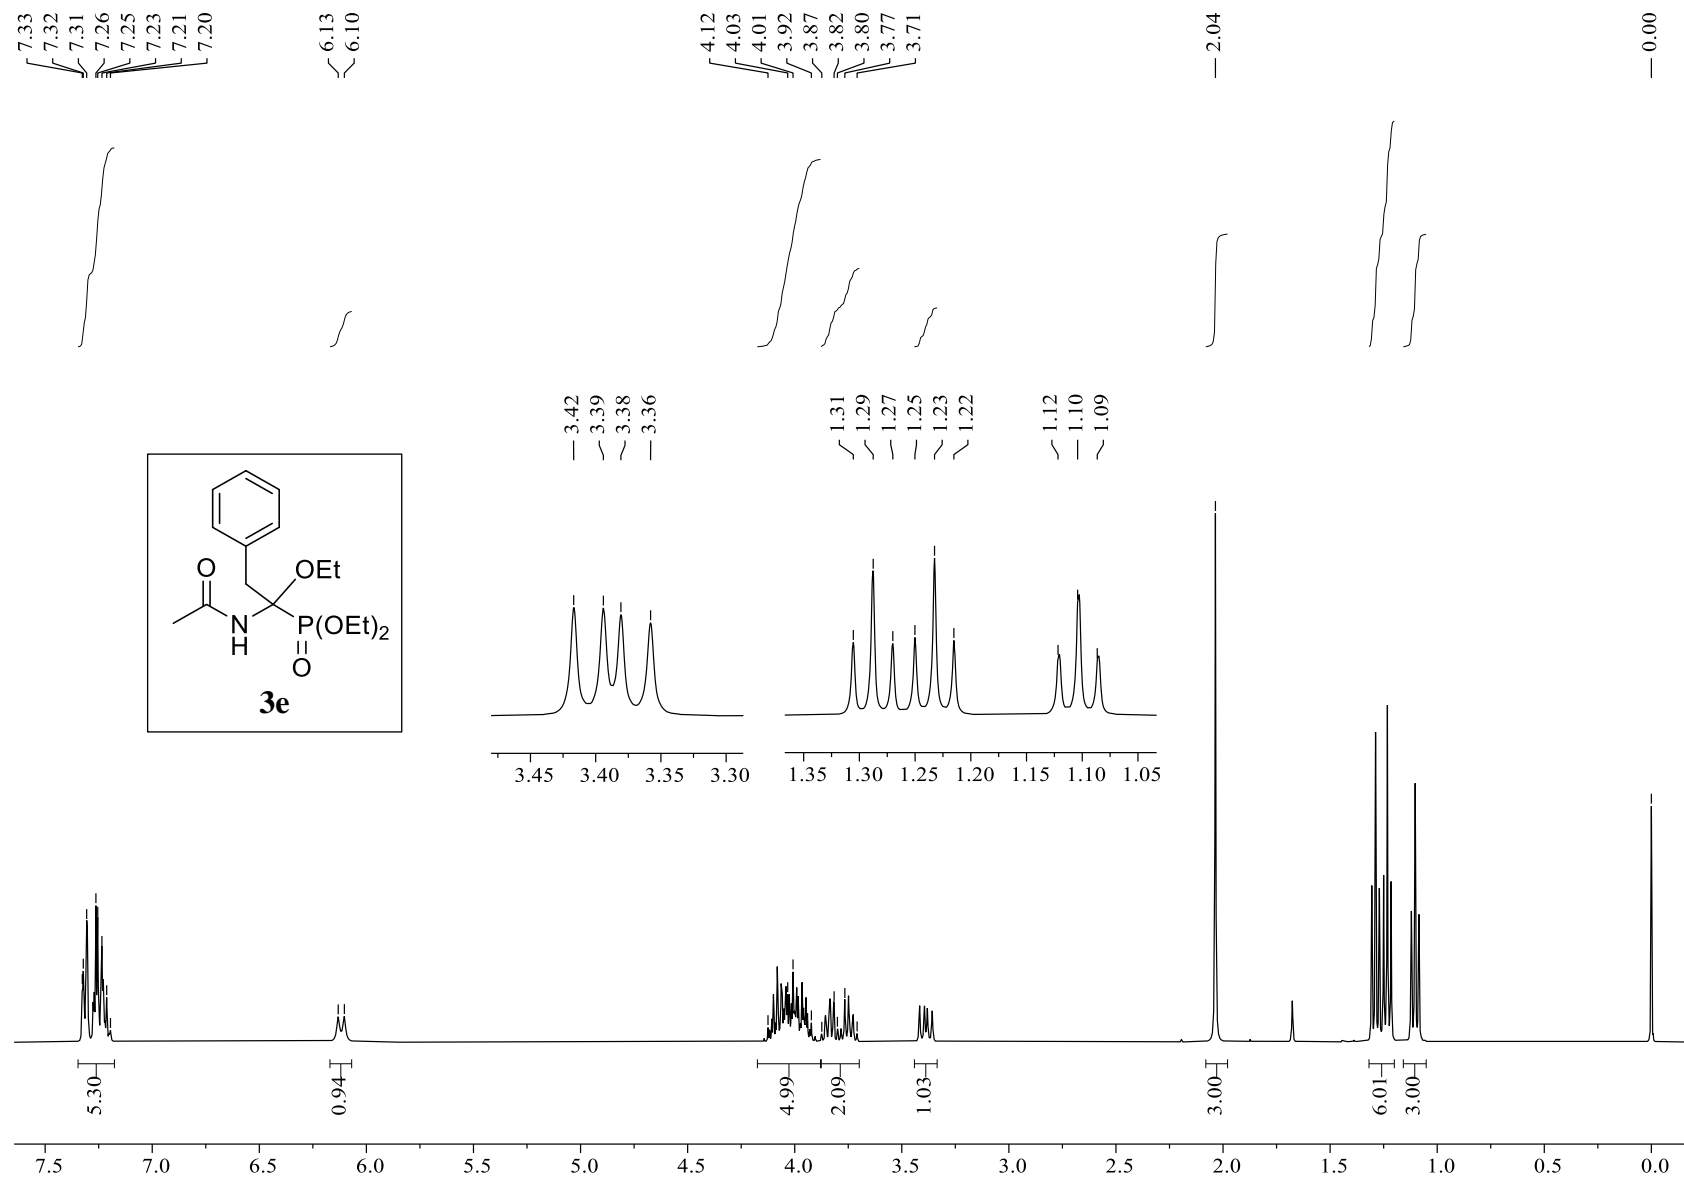

<sup>1</sup>H NMR spectrum of diethyl 1-(N-acetylamino)-1-ethoxy-2-phenylethylphosphonate (**3e**); 400 MHz/CDCl<sub>3</sub>/TMS; δ (ppm).

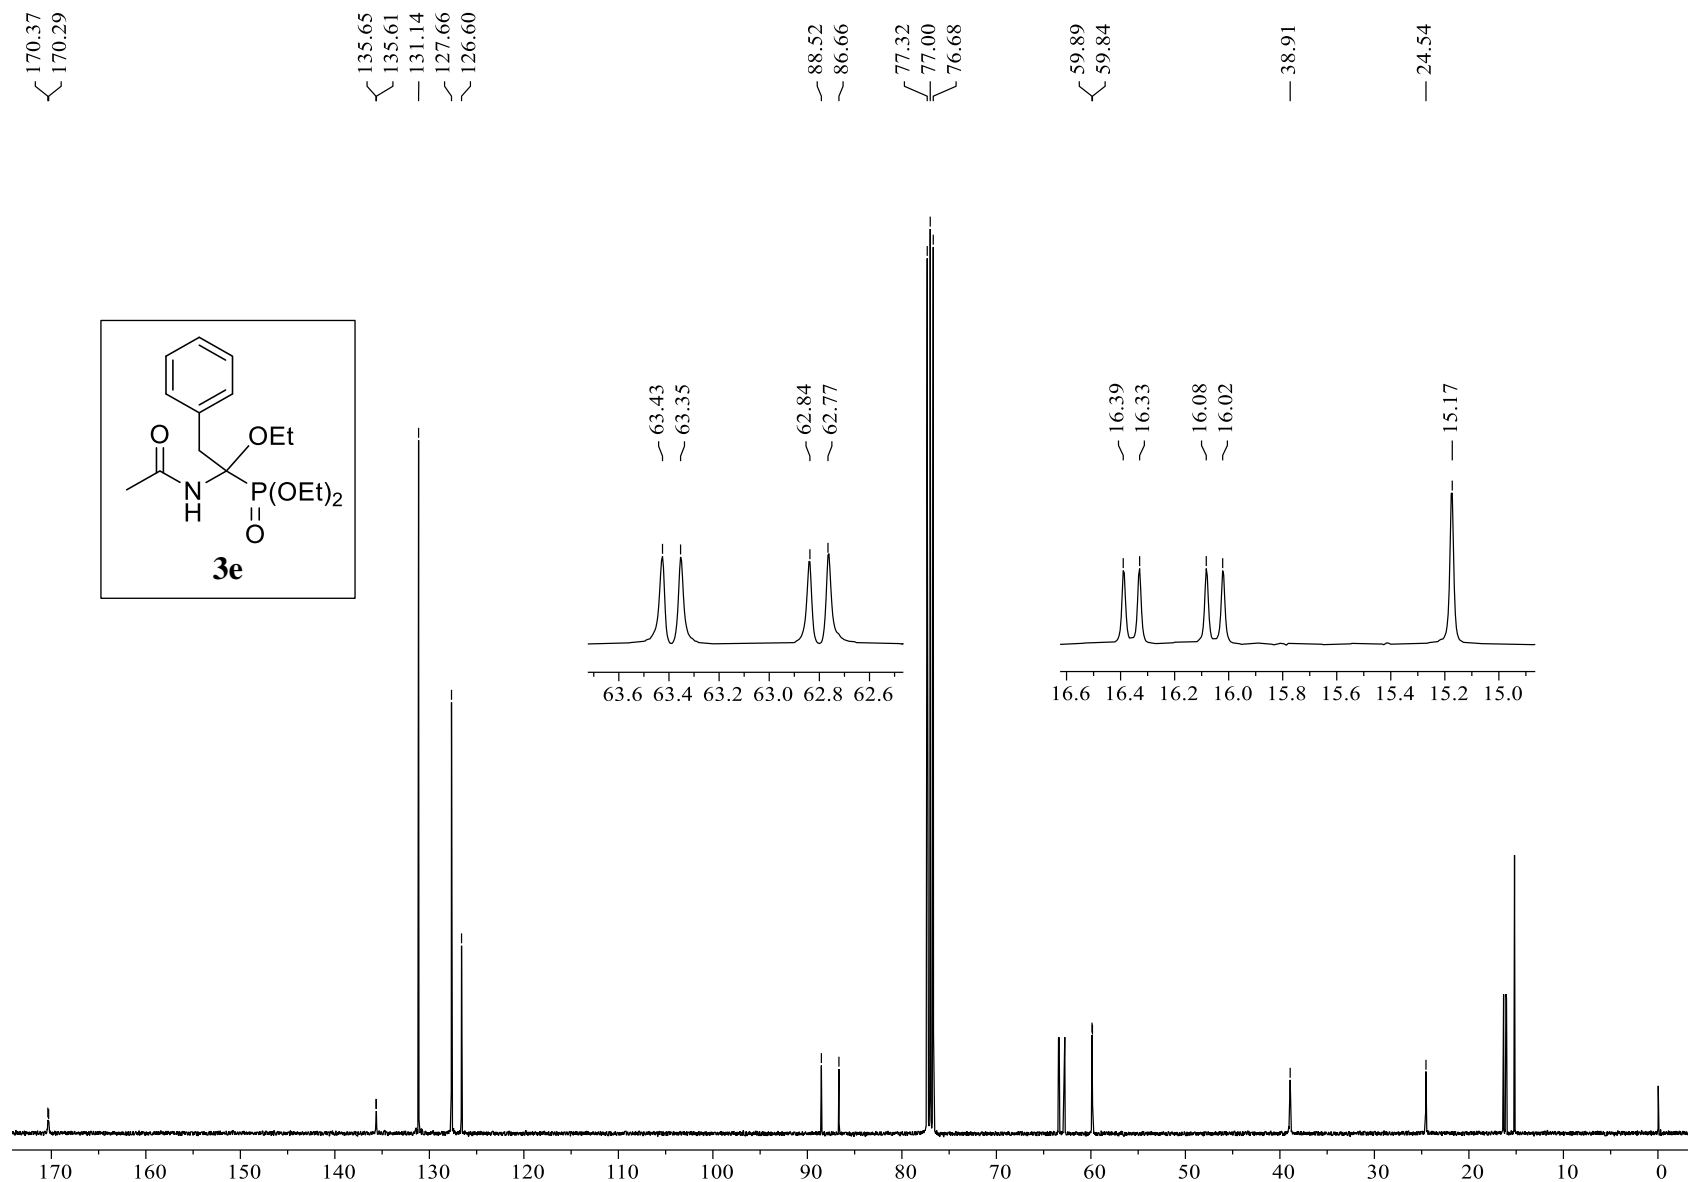

<sup>13</sup>C NMR spectrum of diethyl 1-(N-acetylamino)-1-ethoxy-2-phenylethylphosphonate (**3e**); 100 MHz/CDCl<sub>3</sub>/TMS;  $\delta$  (ppm).

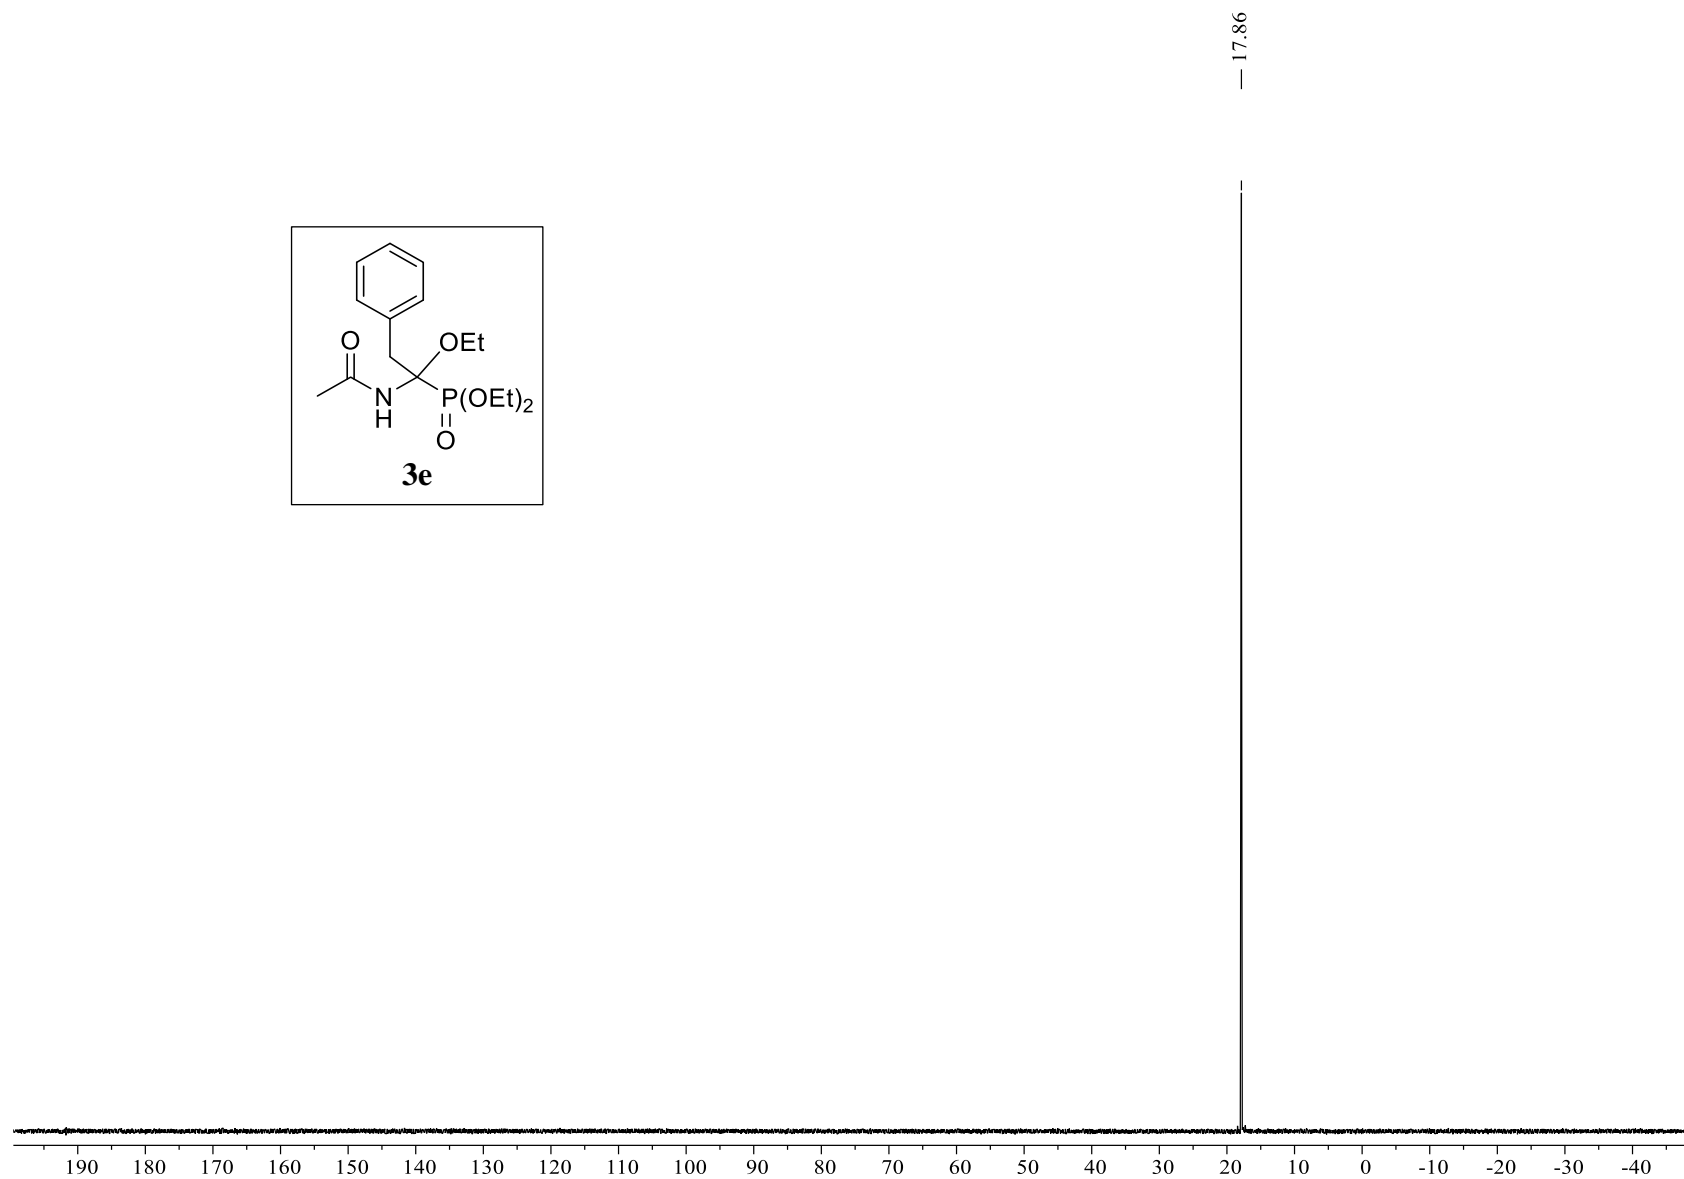

<sup>31</sup>P NMR spectrum of *diethyl 1-(N-acetylamino)-1-ethoxy-2-phenylethylphosphonate (3e)*; 162 MHz/CDCl<sub>3</sub>/TMS;  $\delta$  (ppm).

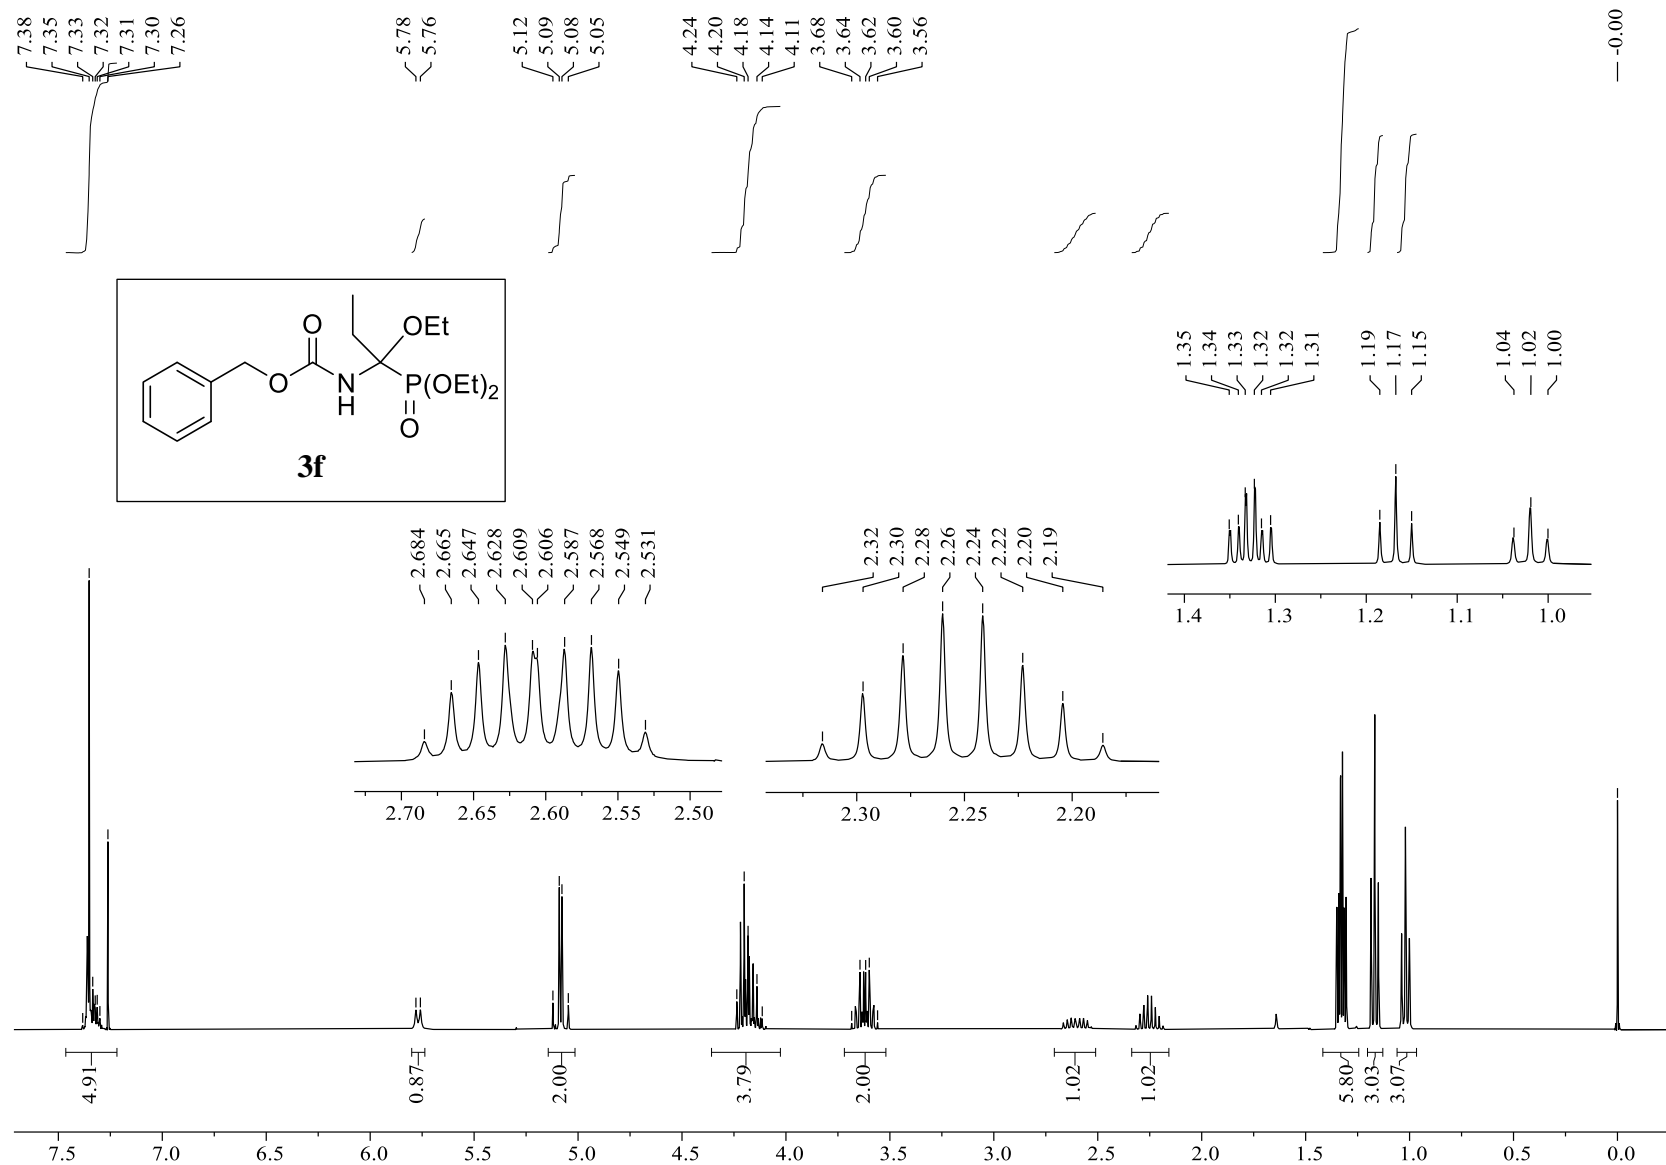

<sup>1</sup>H NMR spectrum of *diethyl 1-(N-benzoyloxycarbonylamino)-1-ethoxypropylphosphonate (3f)*; 400 MHz/CDCl<sub>3</sub>/TMS; δ (ppm).

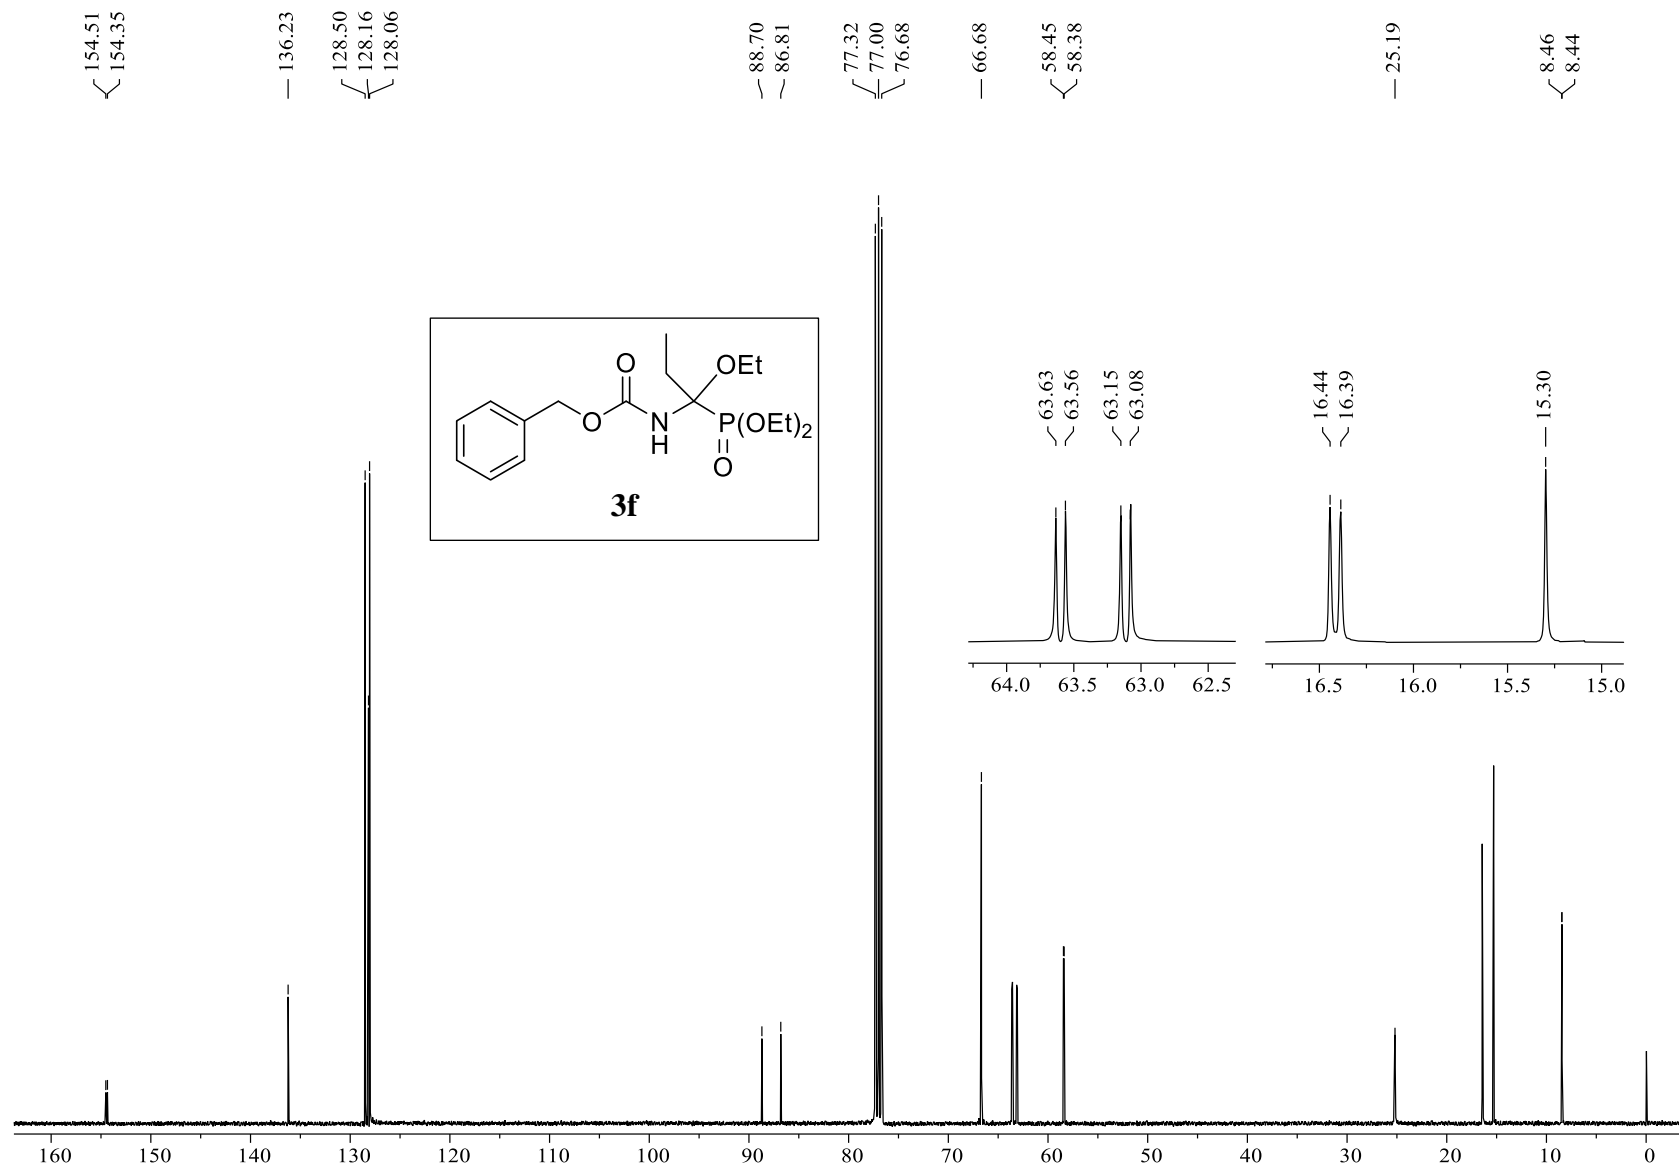

<sup>13</sup>C NMR spectrum of *diethyl 1-(N-benzyloxycarbonylamino)-1-ethoxypropylphosphonate (3f)*; 100 MHz/CDCl<sub>3</sub>/TMS; δ (ppm).

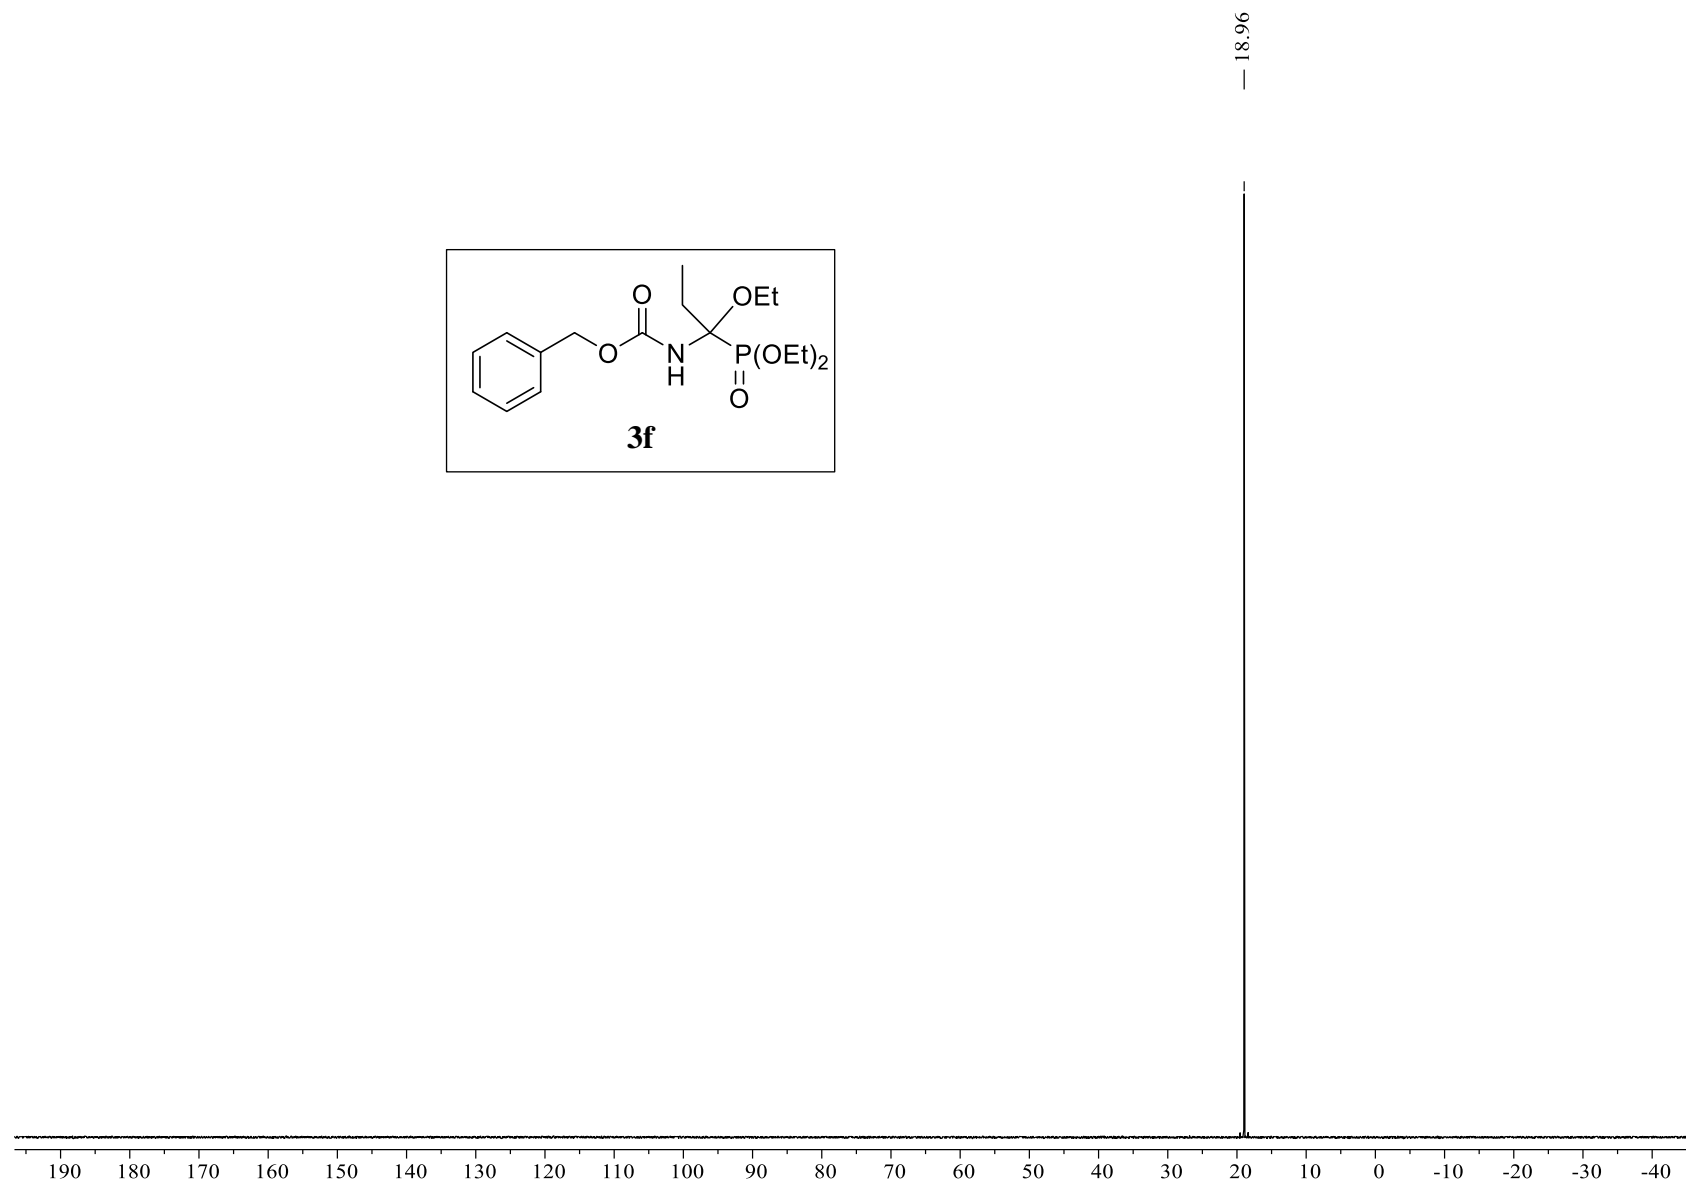

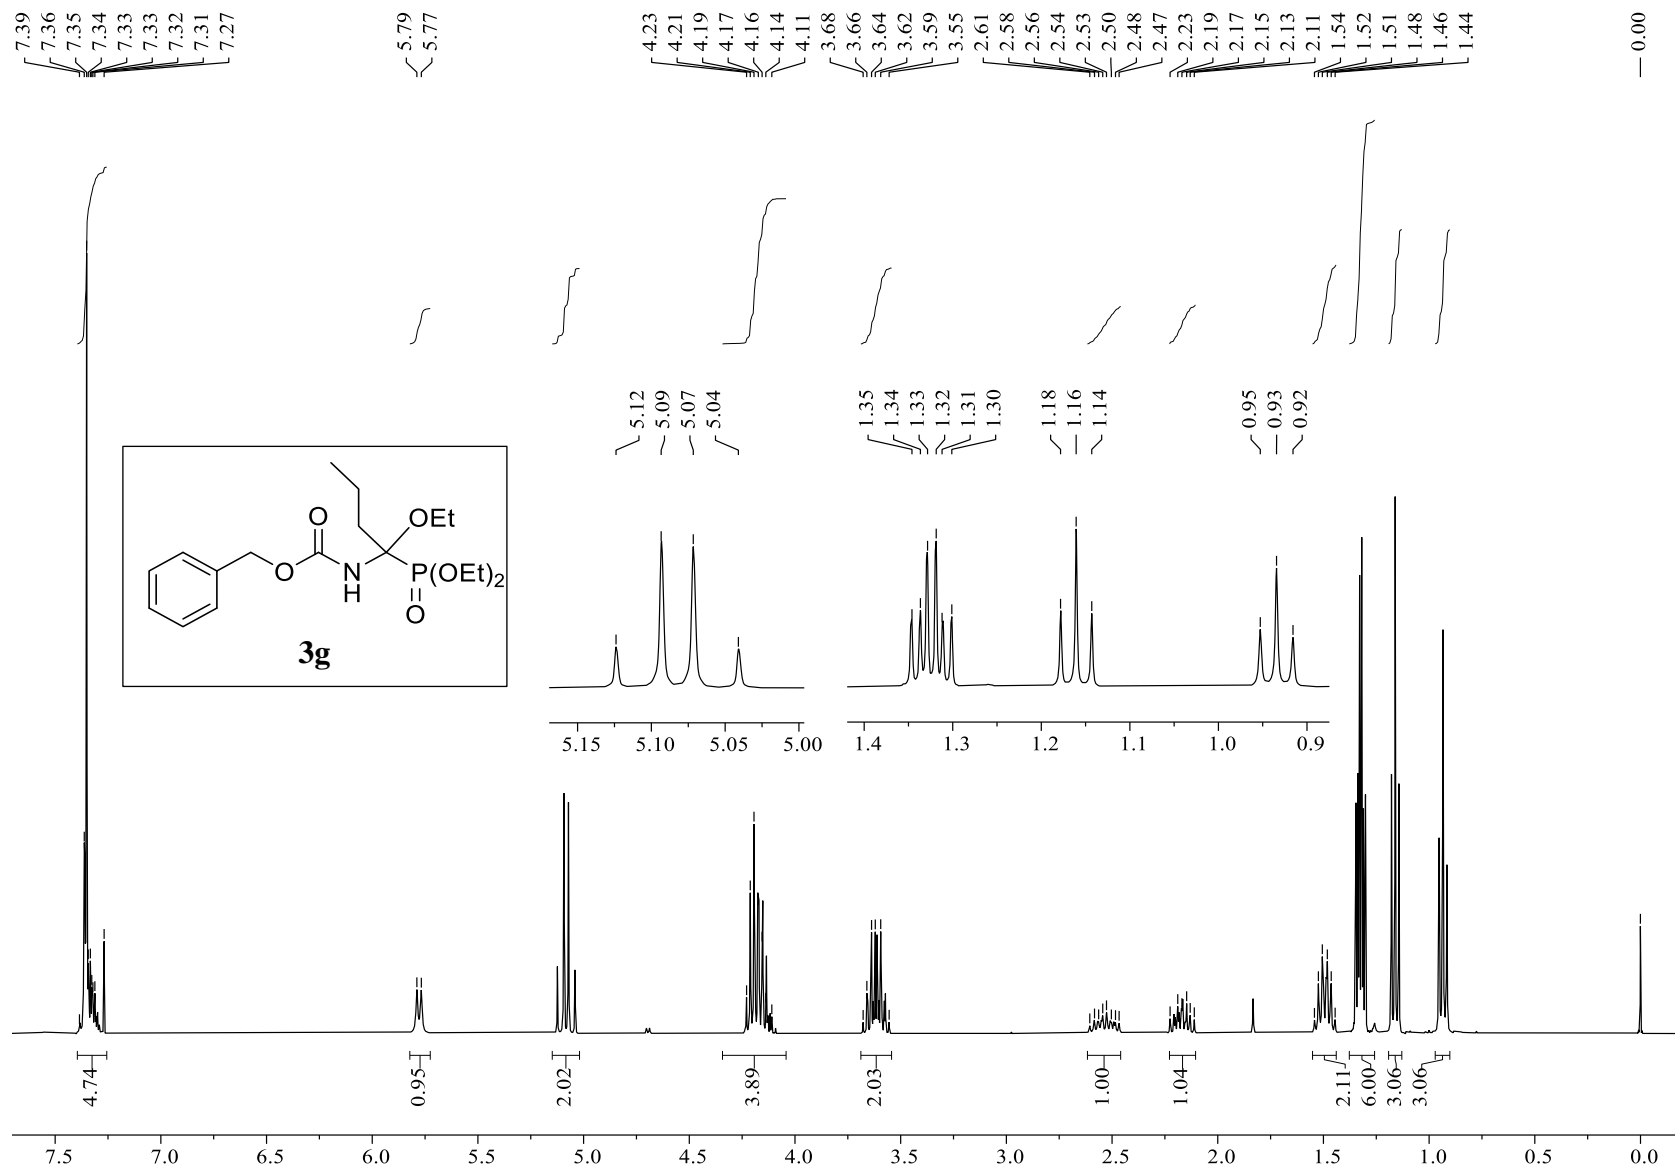

<sup>1</sup>H NMR spectrum of *diethyl 1-(N-benzoyloxycarbonylamino)-1-ethoxybutylphosphonate* (**3g**); 400 MHz/CDCl<sub>3</sub>/TMS; δ (ppm).



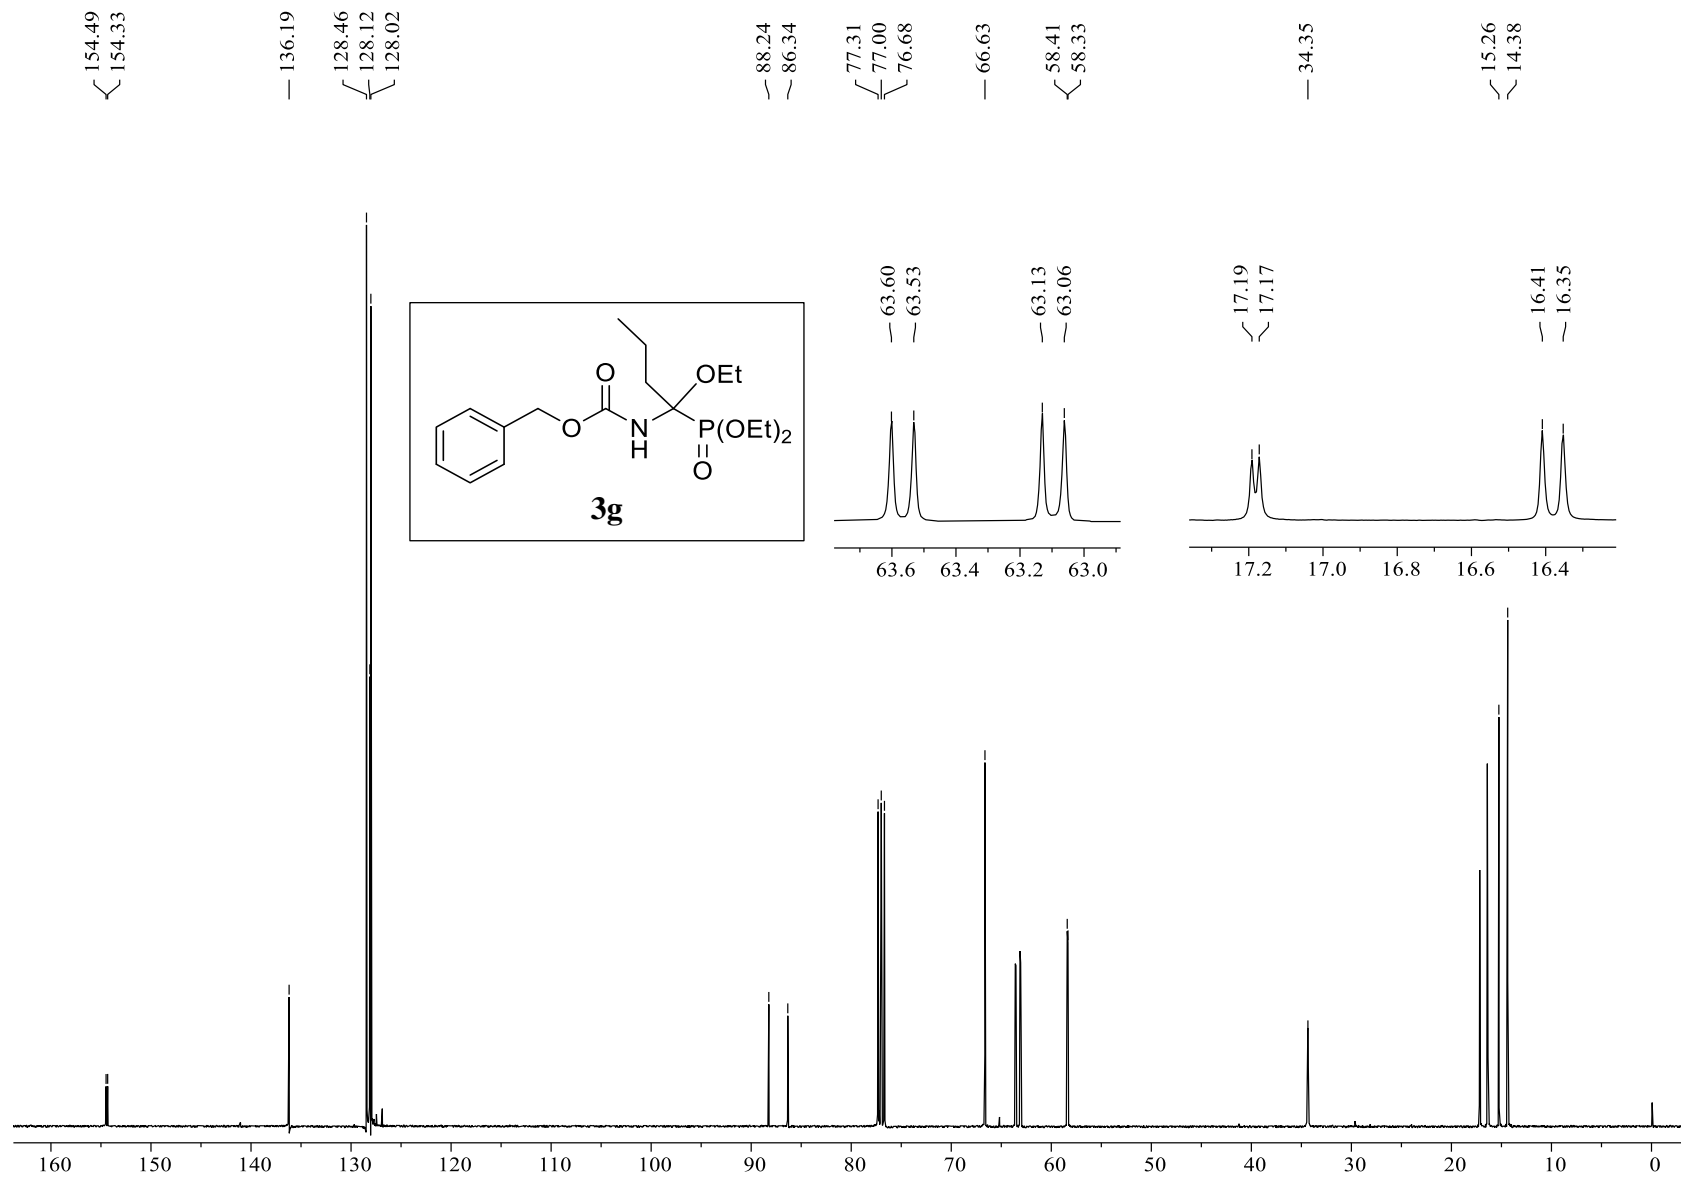

<sup>13</sup>C NMR spectrum of diethyl 1-(*N*-benzyloxycarbonylamino)-1-ethoxybutylphosphonate (**3g**); 100 MHz/CDCl<sub>3</sub>/TMS; δ (ppm).

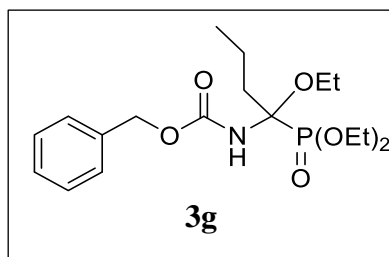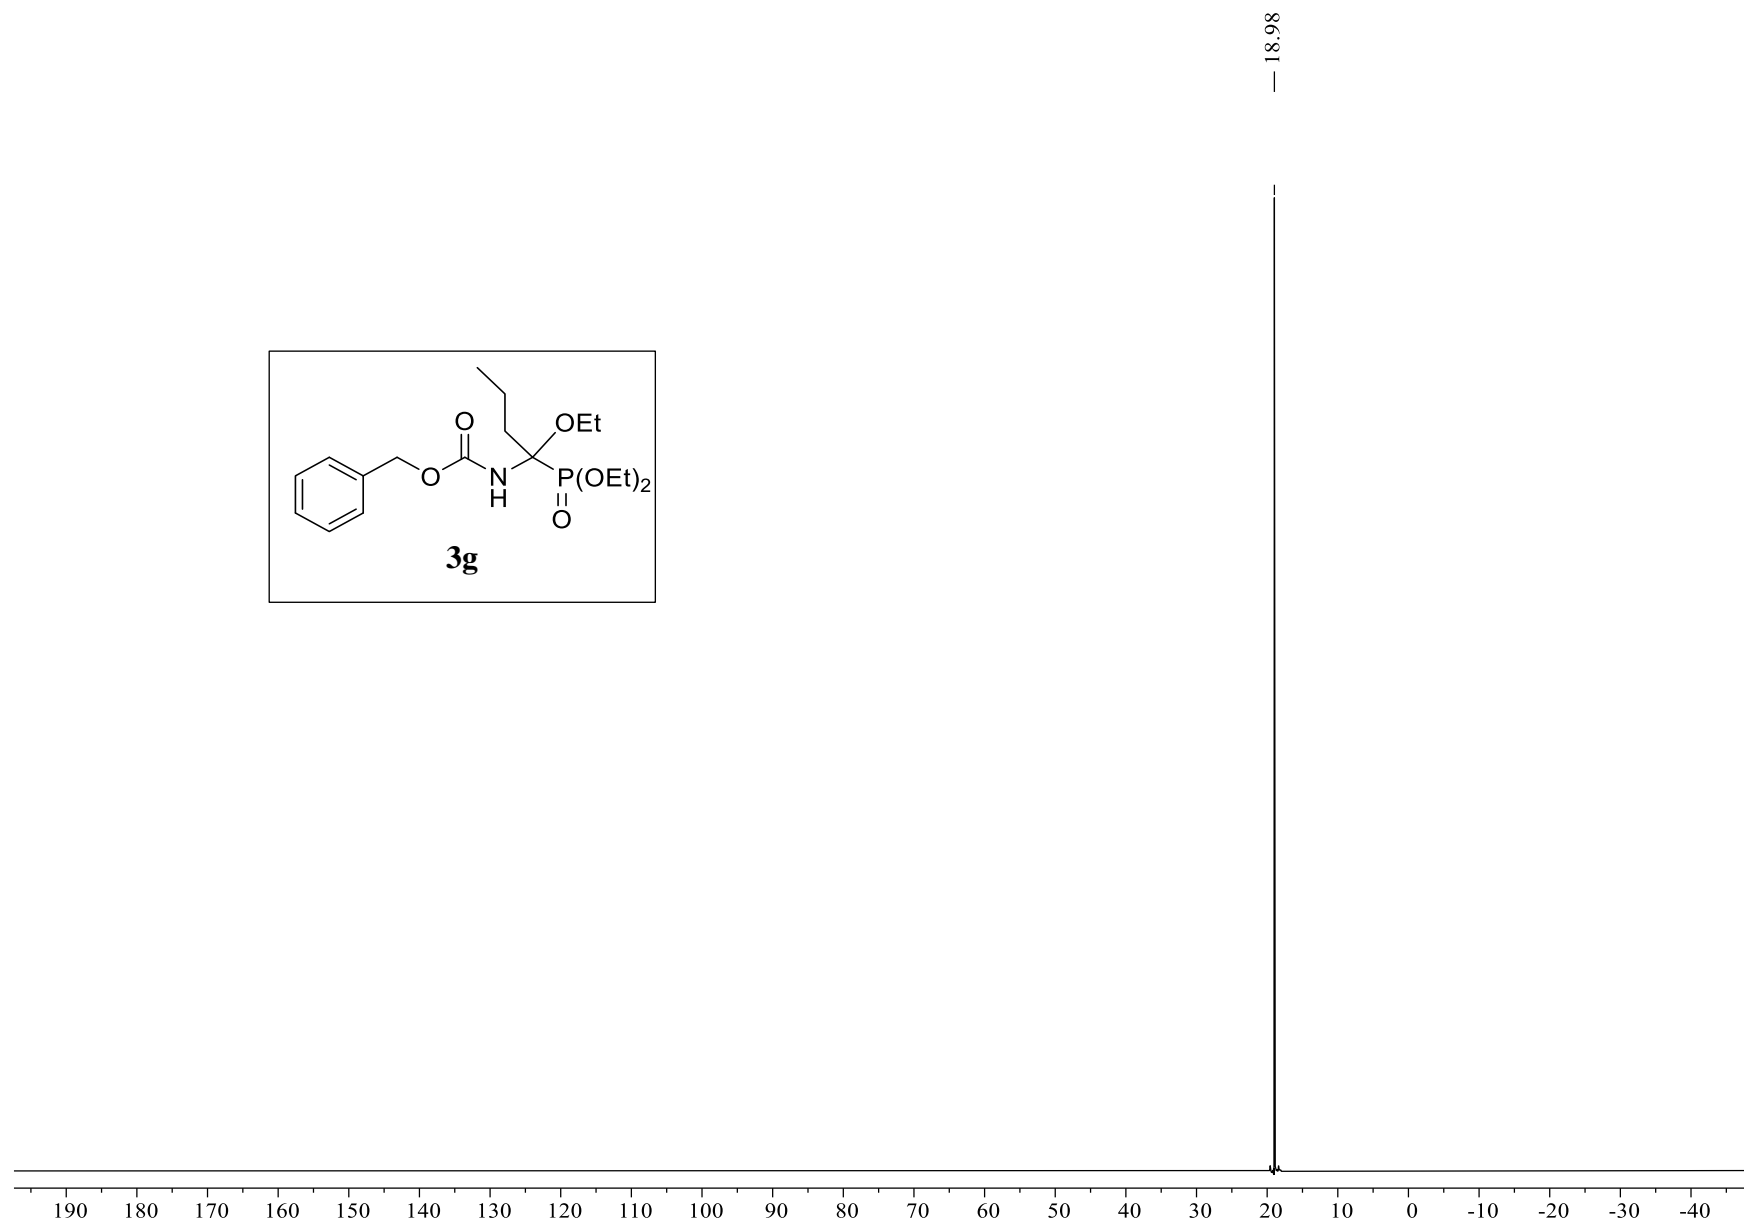

$^{31}\text{P}$  NMR spectrum of *diethyl 1-(N-benzyloxycarbonylamino)-1-ethoxybutylphosphonate (3g)*; 162 MHz/ $\text{CDCl}_3/\text{TMS}$ ;  $\delta$  (ppm).

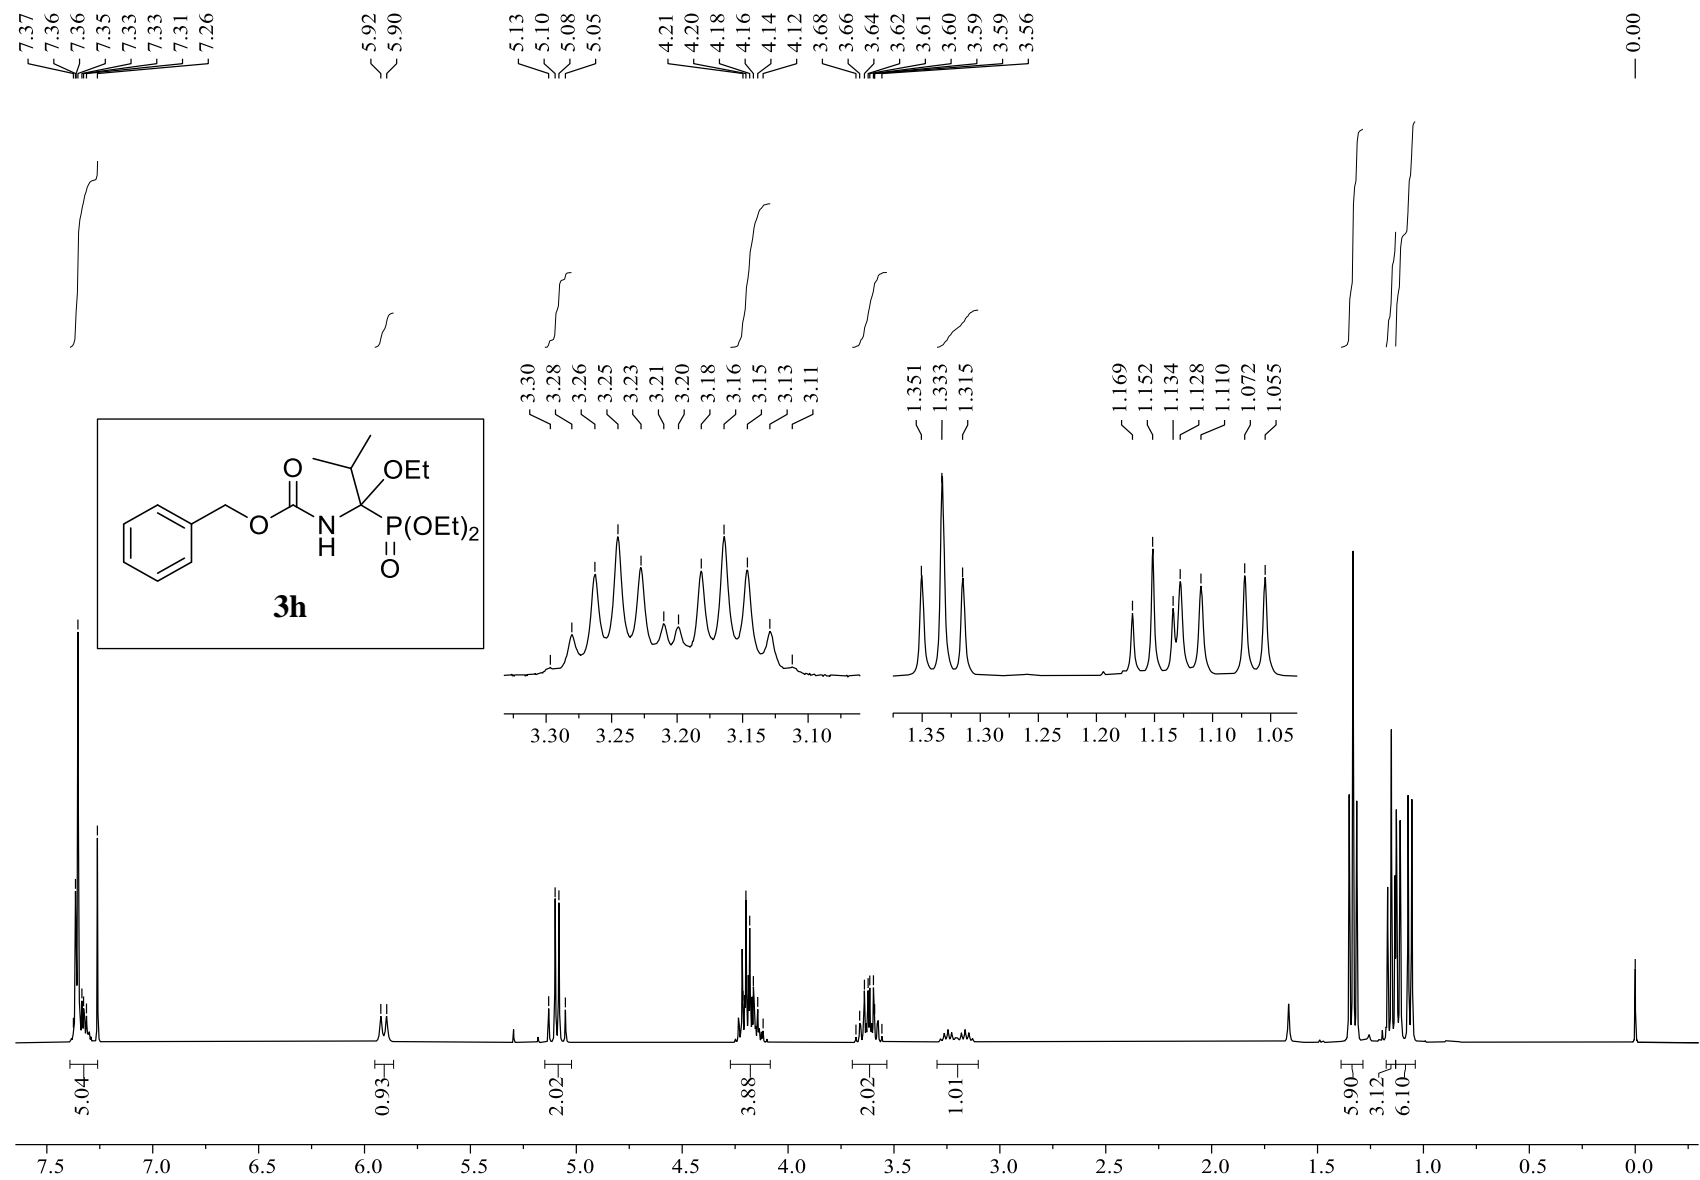

<sup>1</sup>H NMR spectrum of *diethyl 1-(N-benzoyloxycarbonylamino)-1-ethoxy-2-methylpropylphosphonate (3h)*; 400 MHz/CDCl<sub>3</sub>/TMS;  $\delta$  (ppm).

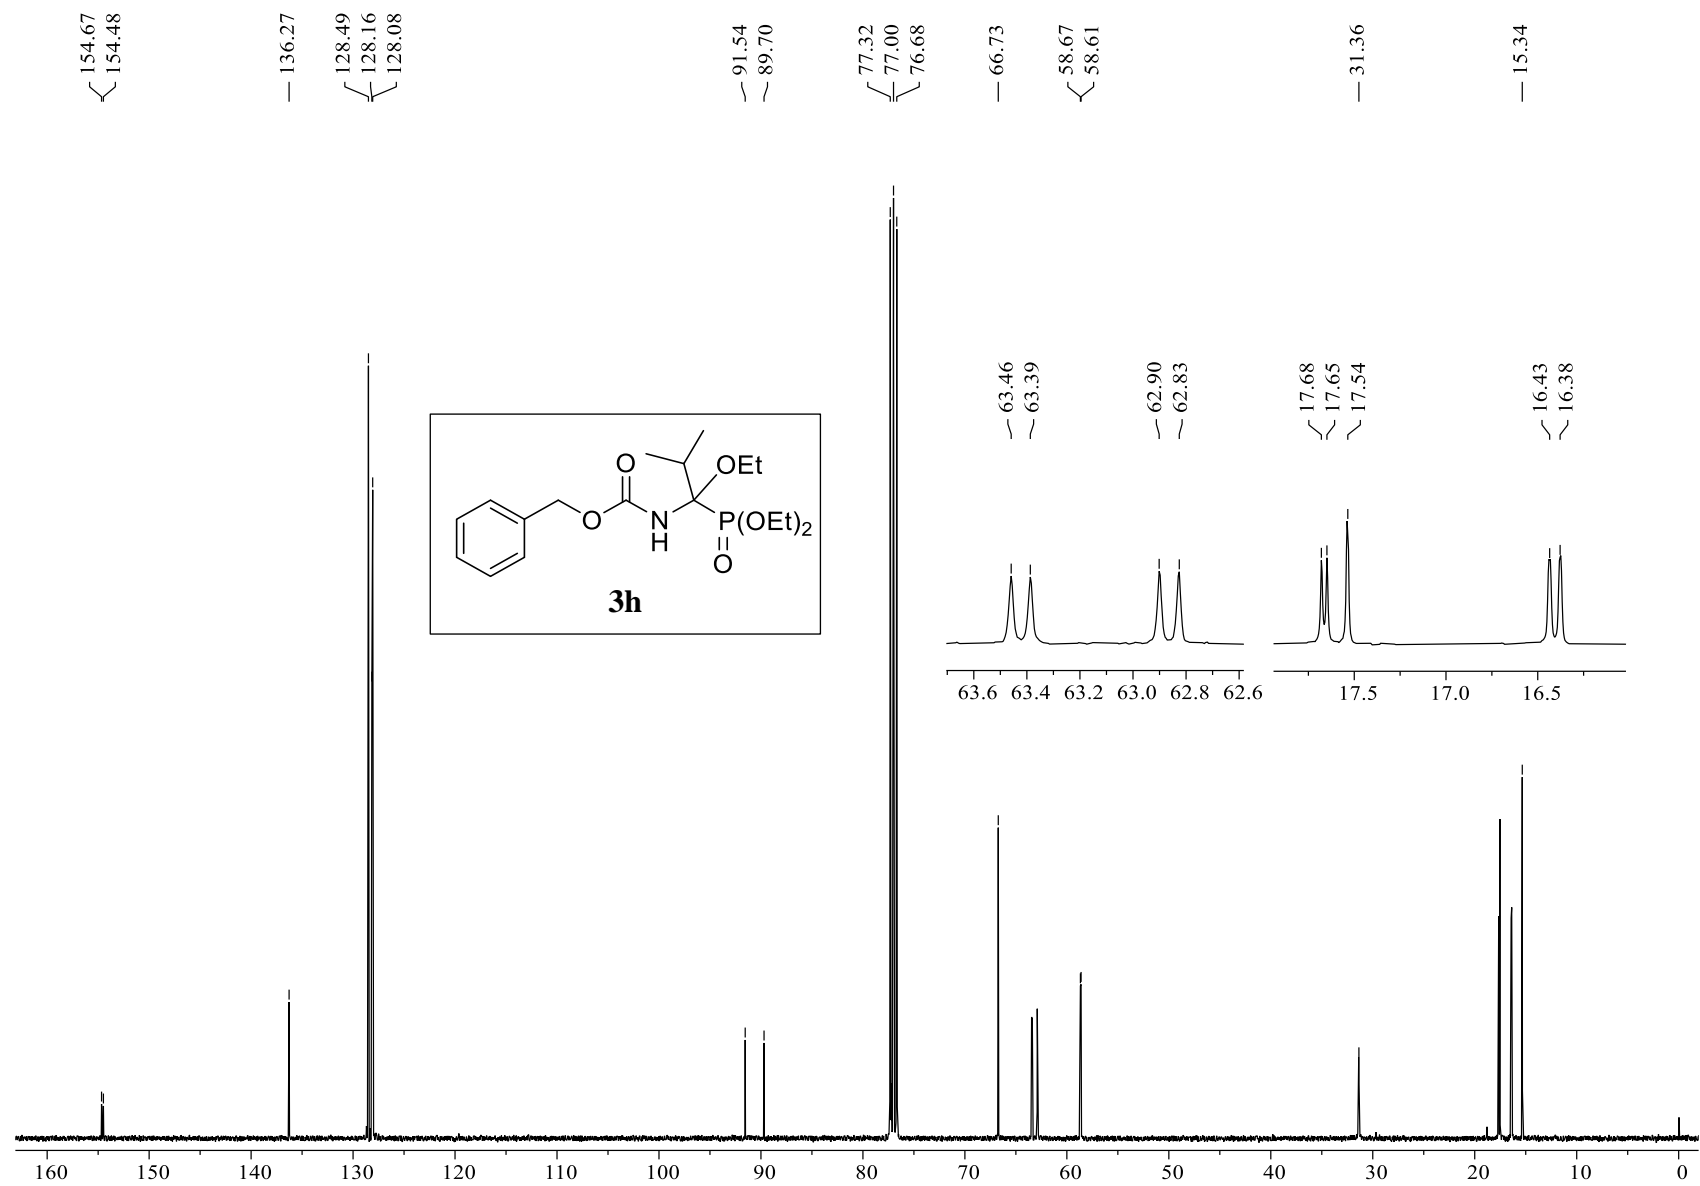

<sup>13</sup>C NMR spectrum of *diethyl 1-(N-benzyloxycarbonylamino)-1-ethoxy-2-methylpropylphosphonate (3h)*; 100 MHz/CDCl<sub>3</sub>/TMS;  $\delta$  (ppm).

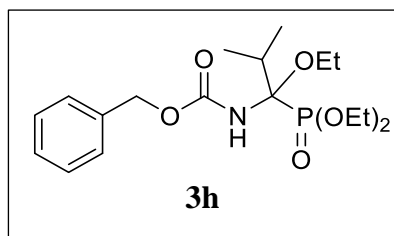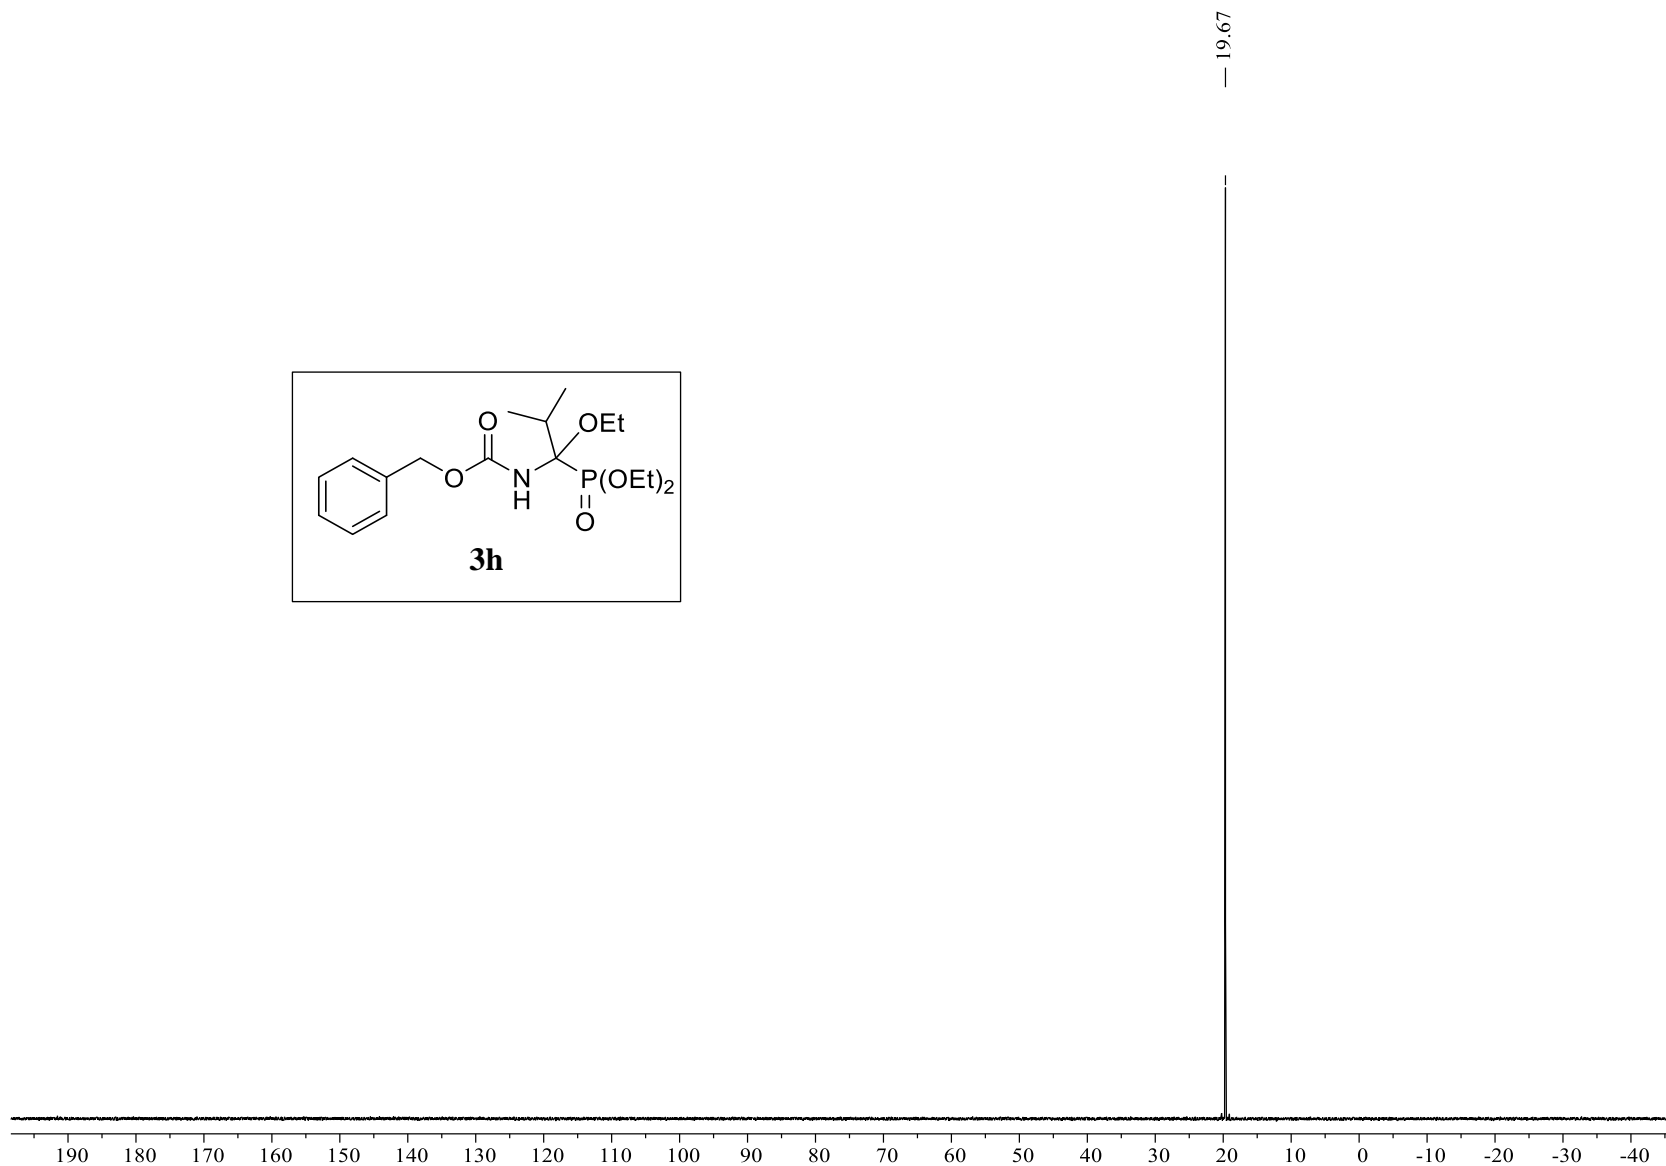

$^{31}\text{P}$  NMR spectrum of *diethyl 1-(N-benzoyloxycarbonylamino)-1-ethoxy-2-methylpropylphosphonate (3h)*; 162 MHz/ $\text{CDCl}_3/\text{TMS}$ ;  $\delta$  (ppm).

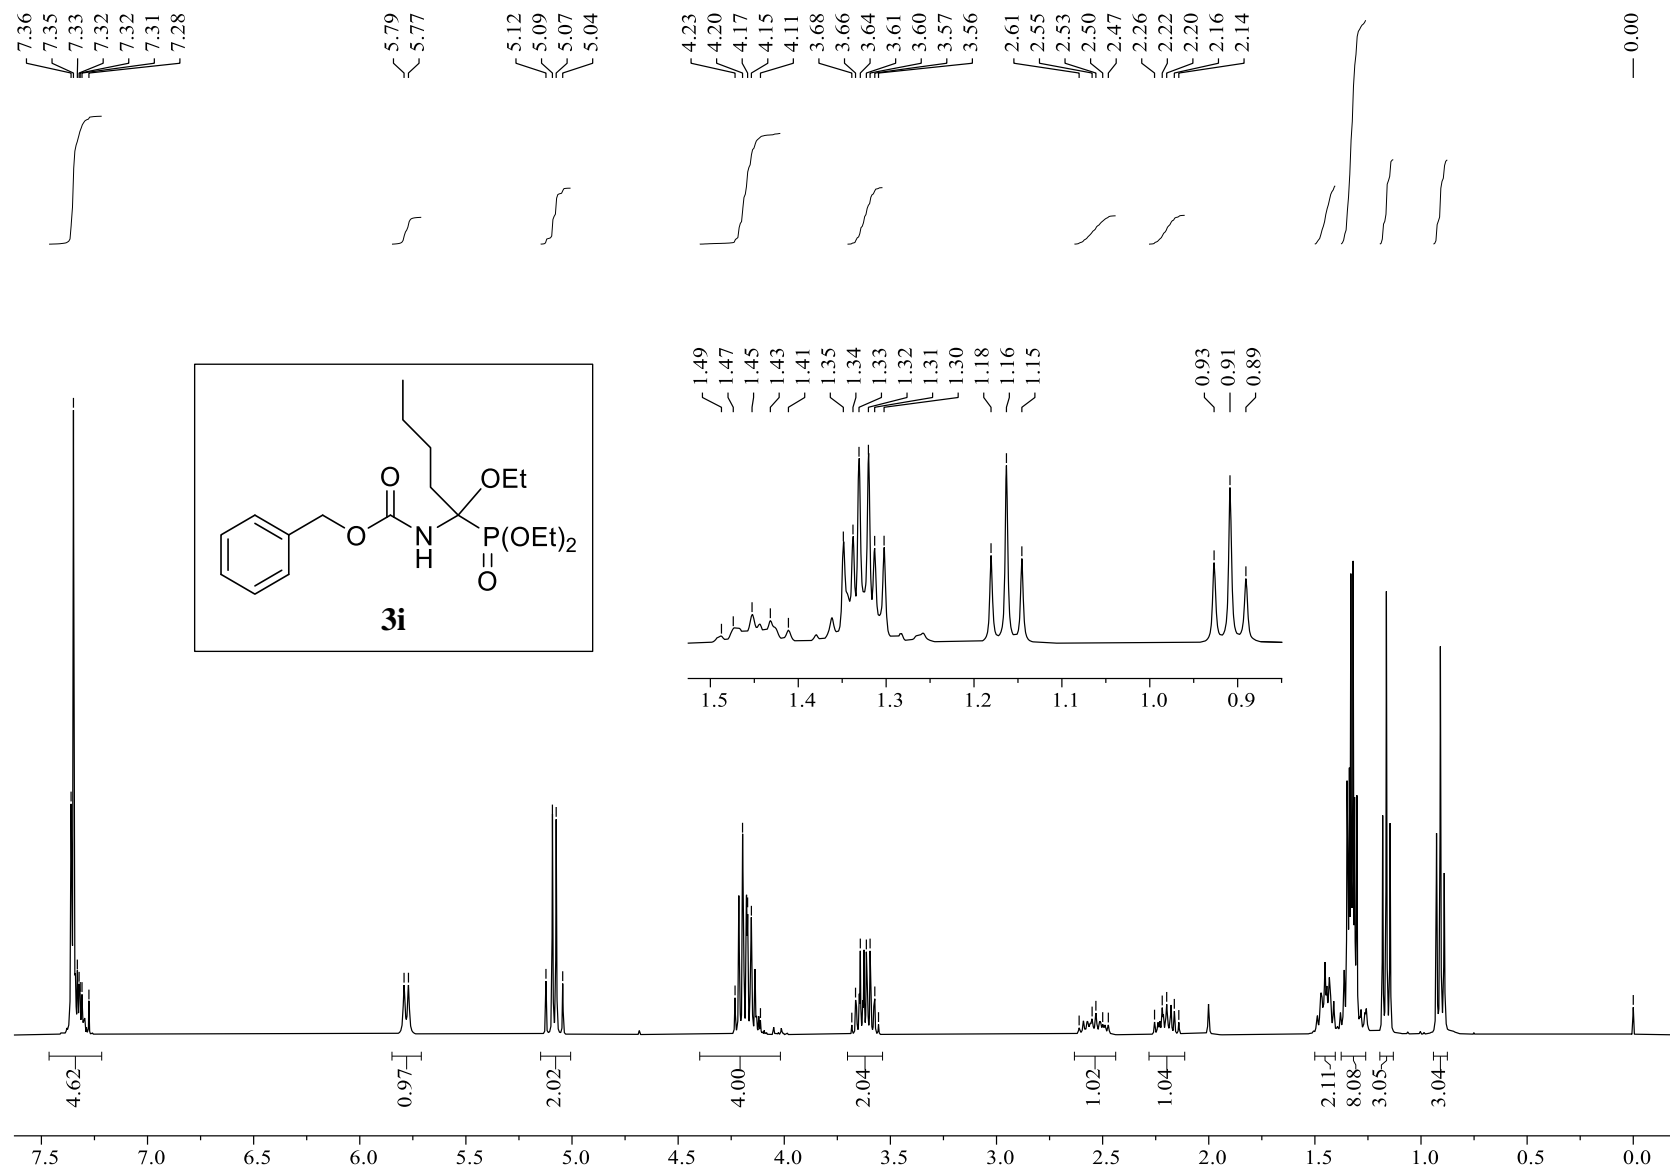

<sup>1</sup>H NMR spectrum of *diethyl 1-(N-benzoyloxycarbonylamino)-1-ethoxypentylphosphonate (3i)*; 400 MHz/CDCl<sub>3</sub>/TMS;  $\delta$  (ppm).

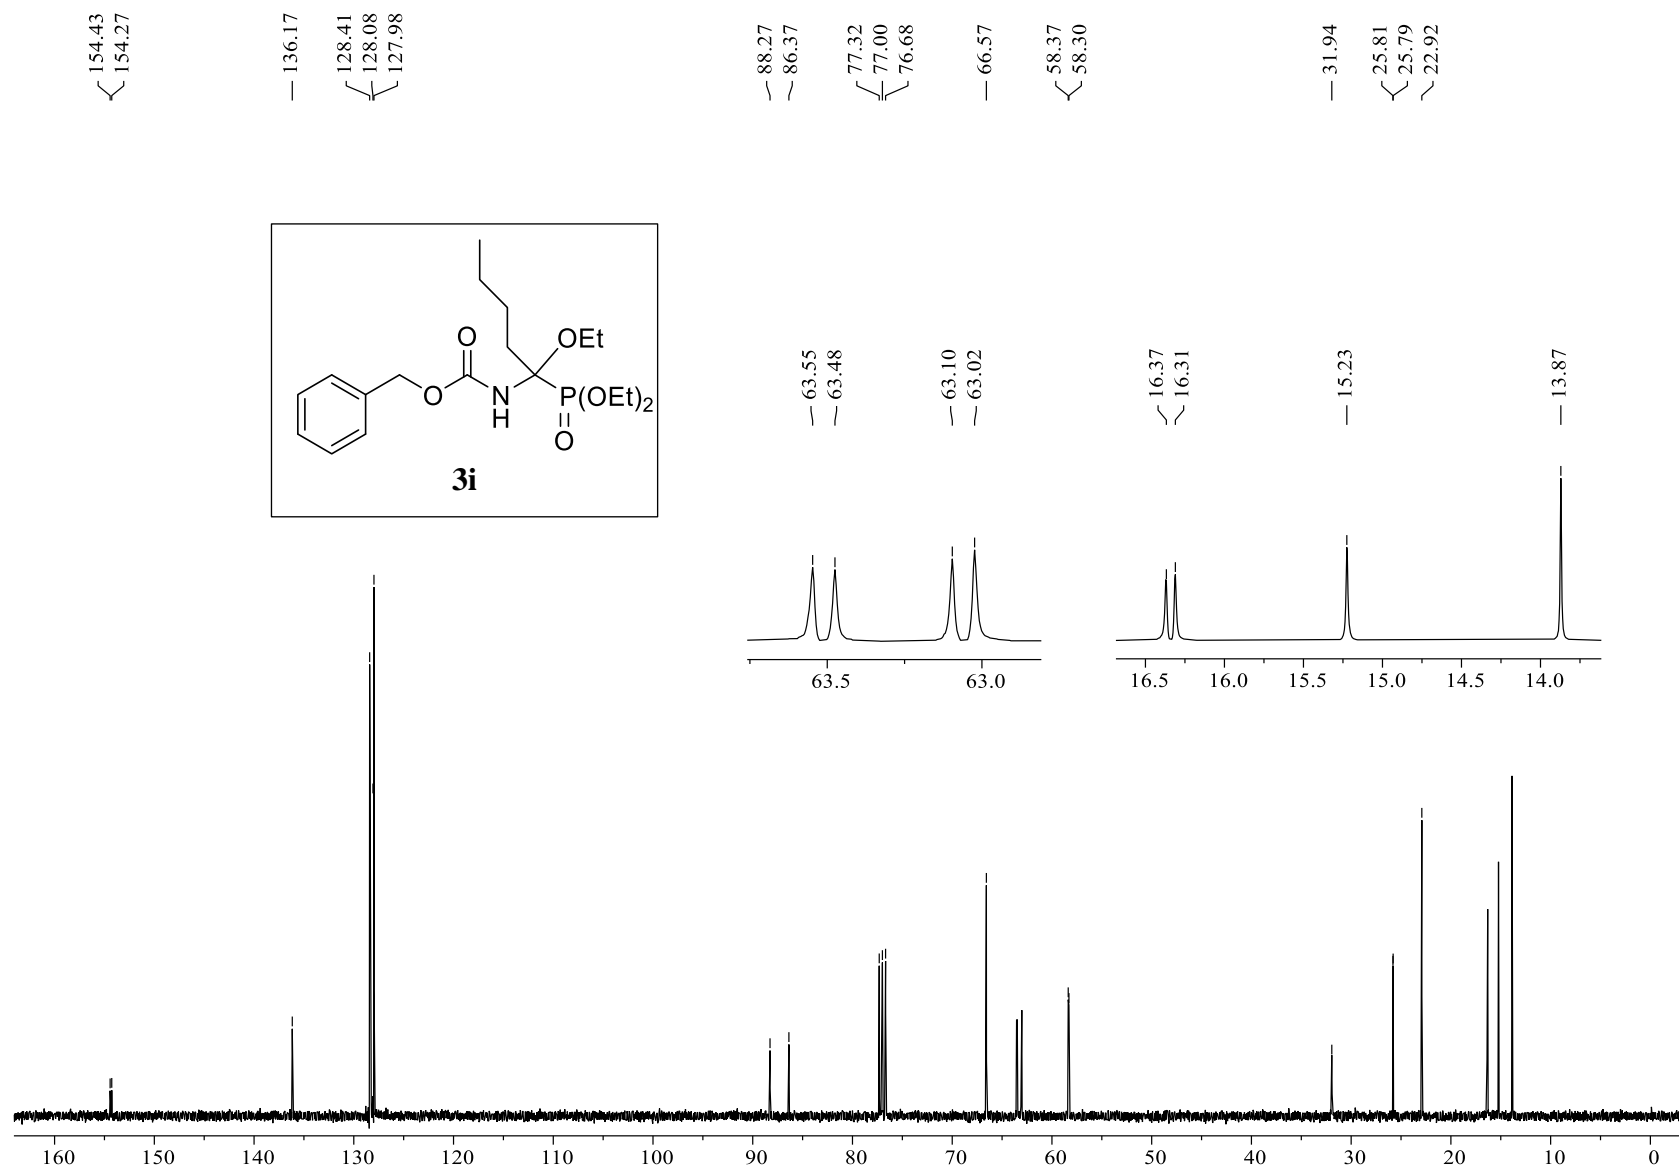

<sup>13</sup>C NMR spectrum of *diethyl 1-(N-benzyloxycarbonylamino)-1-ethoxypentylphosphonate (3i)*; 100 MHz/CDCl<sub>3</sub>/TMS; δ (ppm).

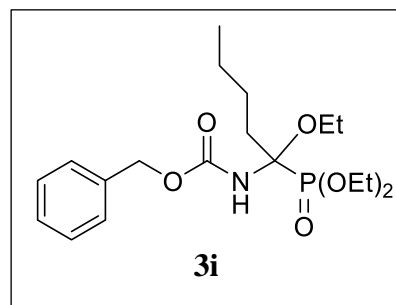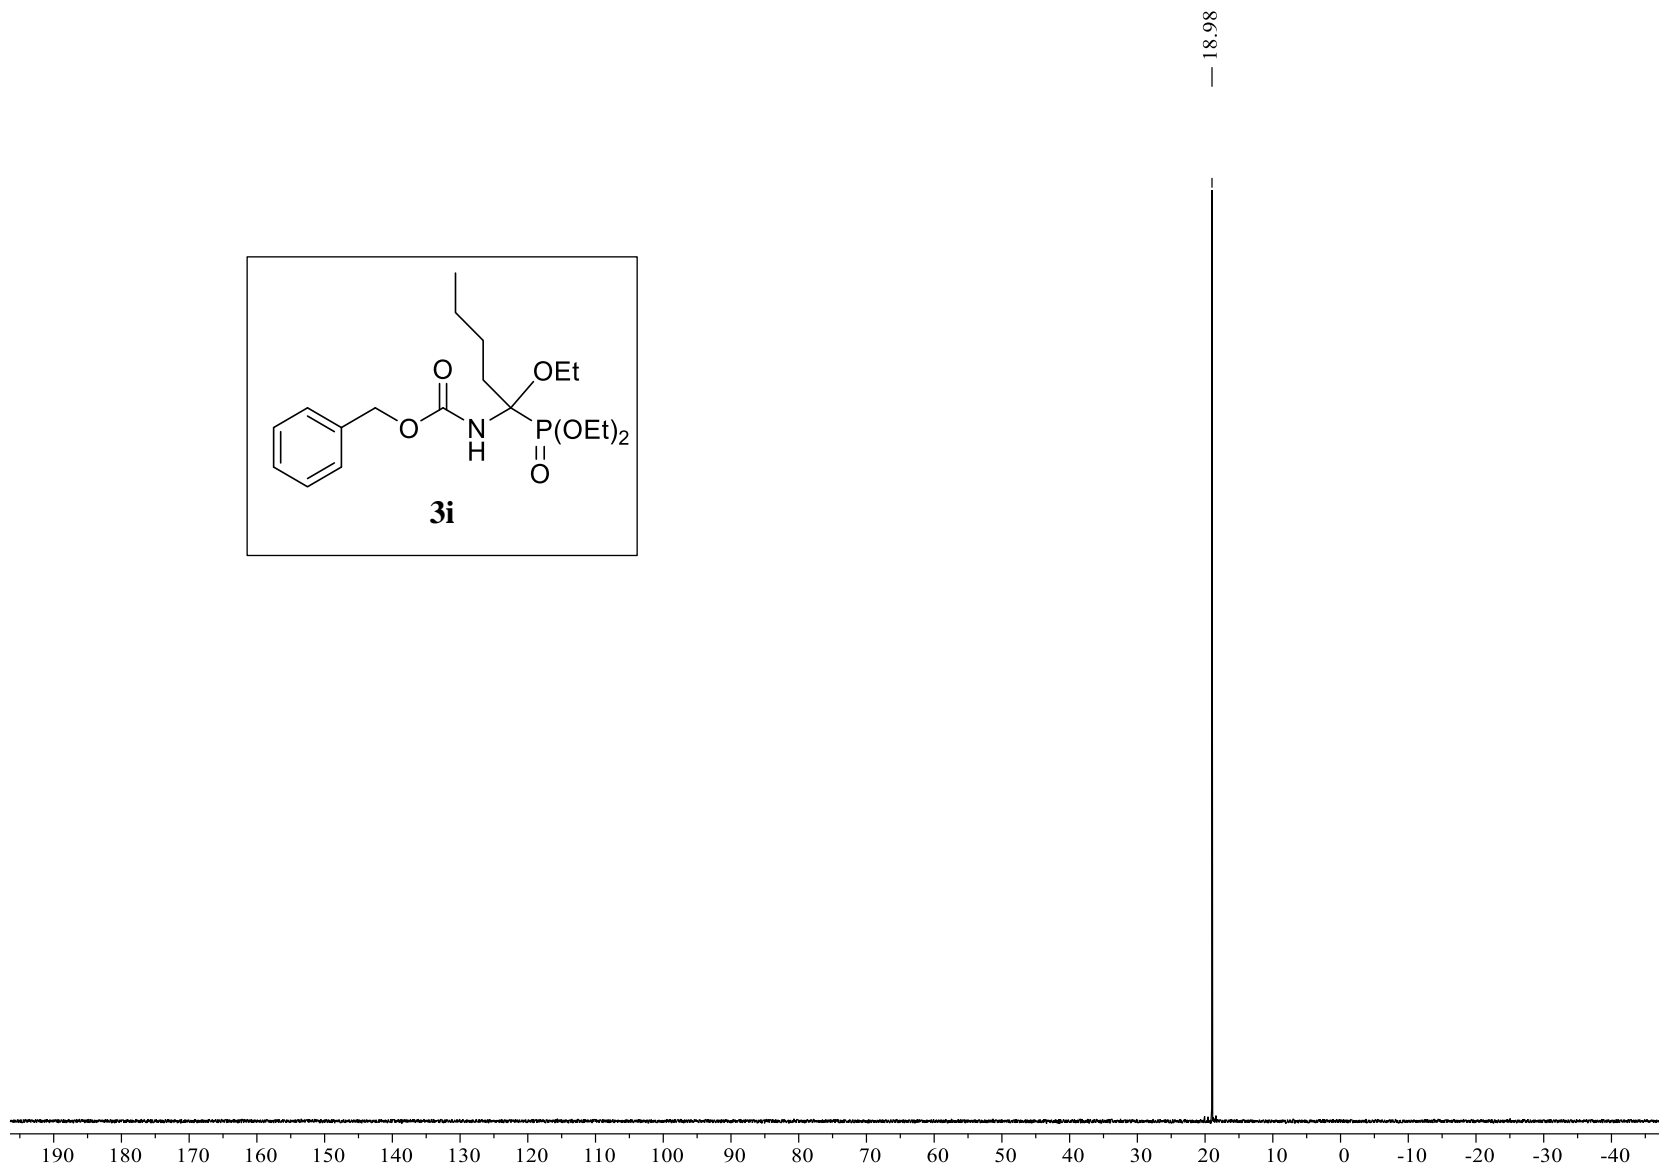

$^{31}\text{P}$  NMR spectrum of *diethyl 1-(N-benzyloxycarbonylamino)-1-ethoxypentylphosphonate (3i)*; 162 MHz/ $\text{CDCl}_3/\text{TMS}$ ;  $\delta$  (ppm).



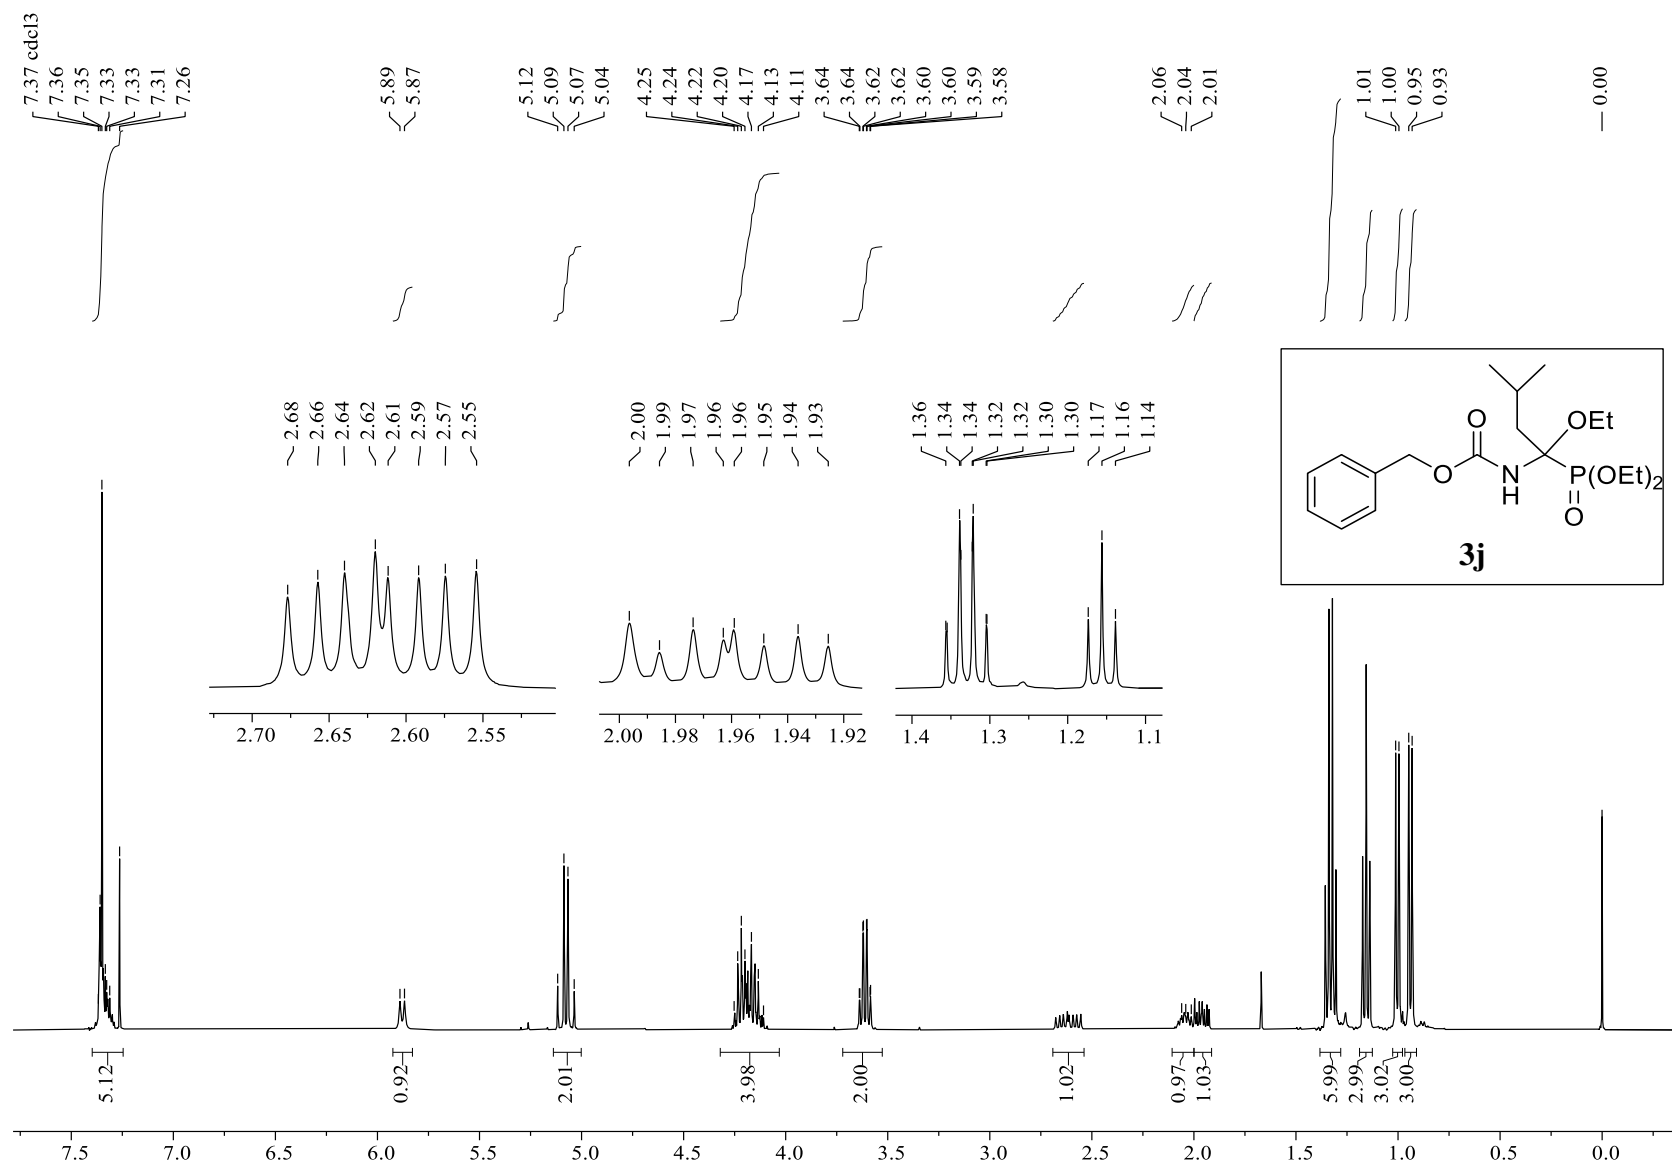

<sup>1</sup>H NMR spectrum of *diethyl 1-(N-benzoyloxycarbonylamino)-1-ethoxy-3-methylbutylphosphonate (3j)*; 400 MHz/CDCl<sub>3</sub>/TMS;  $\delta$  (ppm).

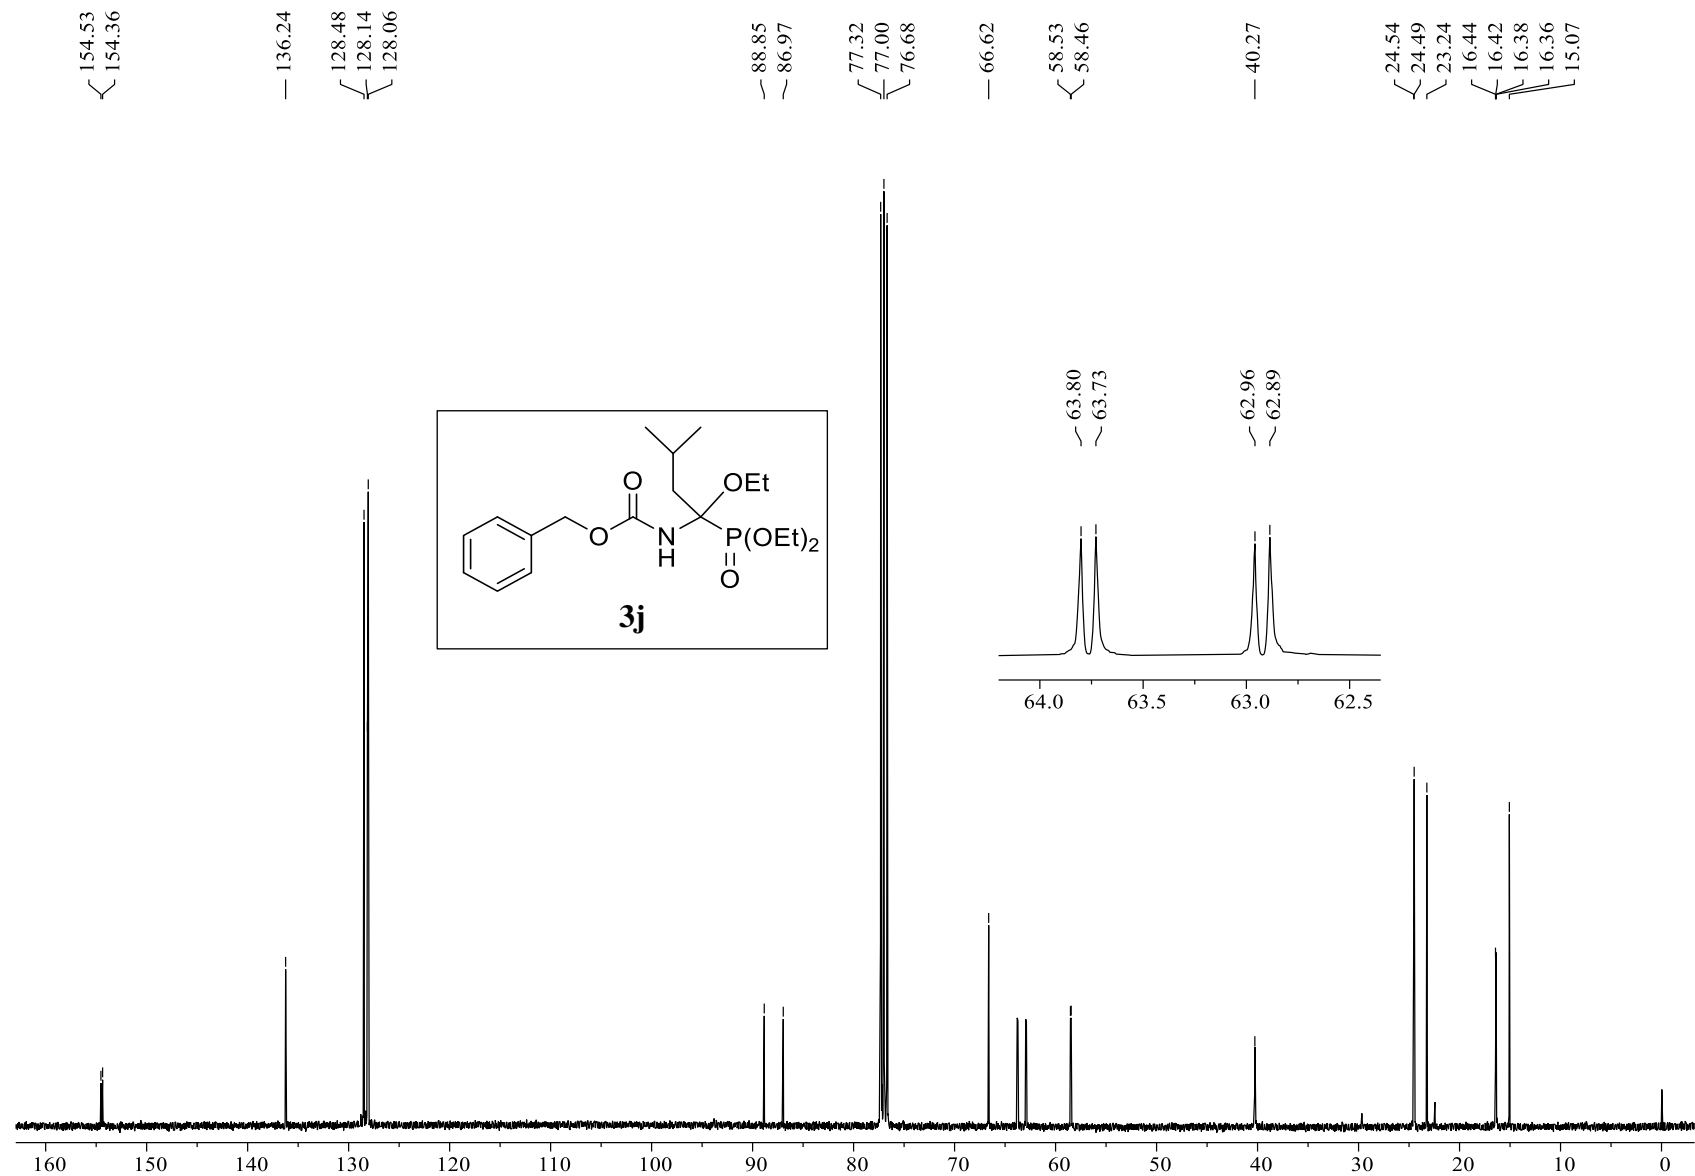

<sup>13</sup>C NMR spectrum of diethyl 1-(*N*-benzyloxycarbonylamino)-1-ethoxy-3-methylbutylphosphonate (**3j**); 100 MHz/CDCl<sub>3</sub>/TMS; δ (ppm).

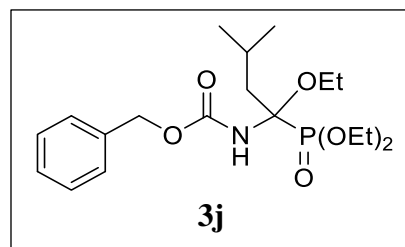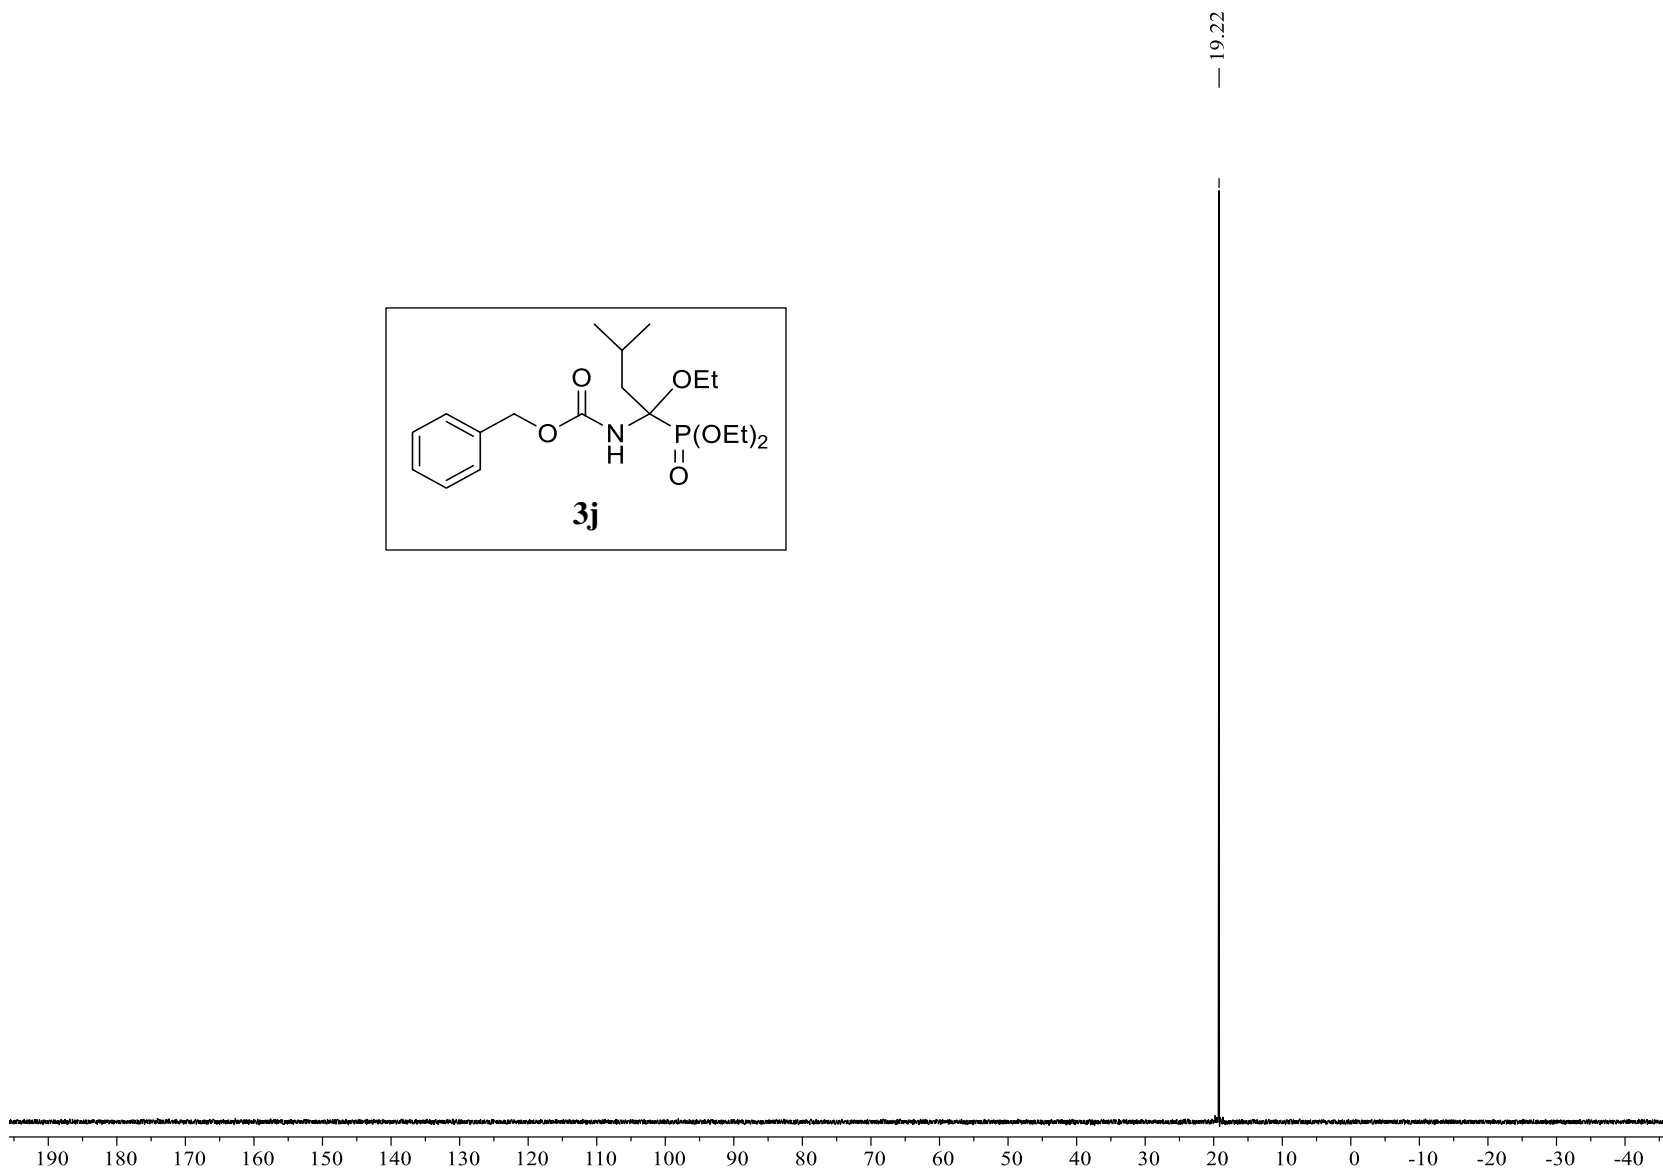

$^{31}\text{P}$  NMR spectrum of *diethyl 1-(N-benzoyloxycarbonylamino)-1-ethoxy-3-methylbutylphosphonate (3j)*; 162 MHz/ $\text{CDCl}_3$ /TMS;  $\delta$  (ppm).

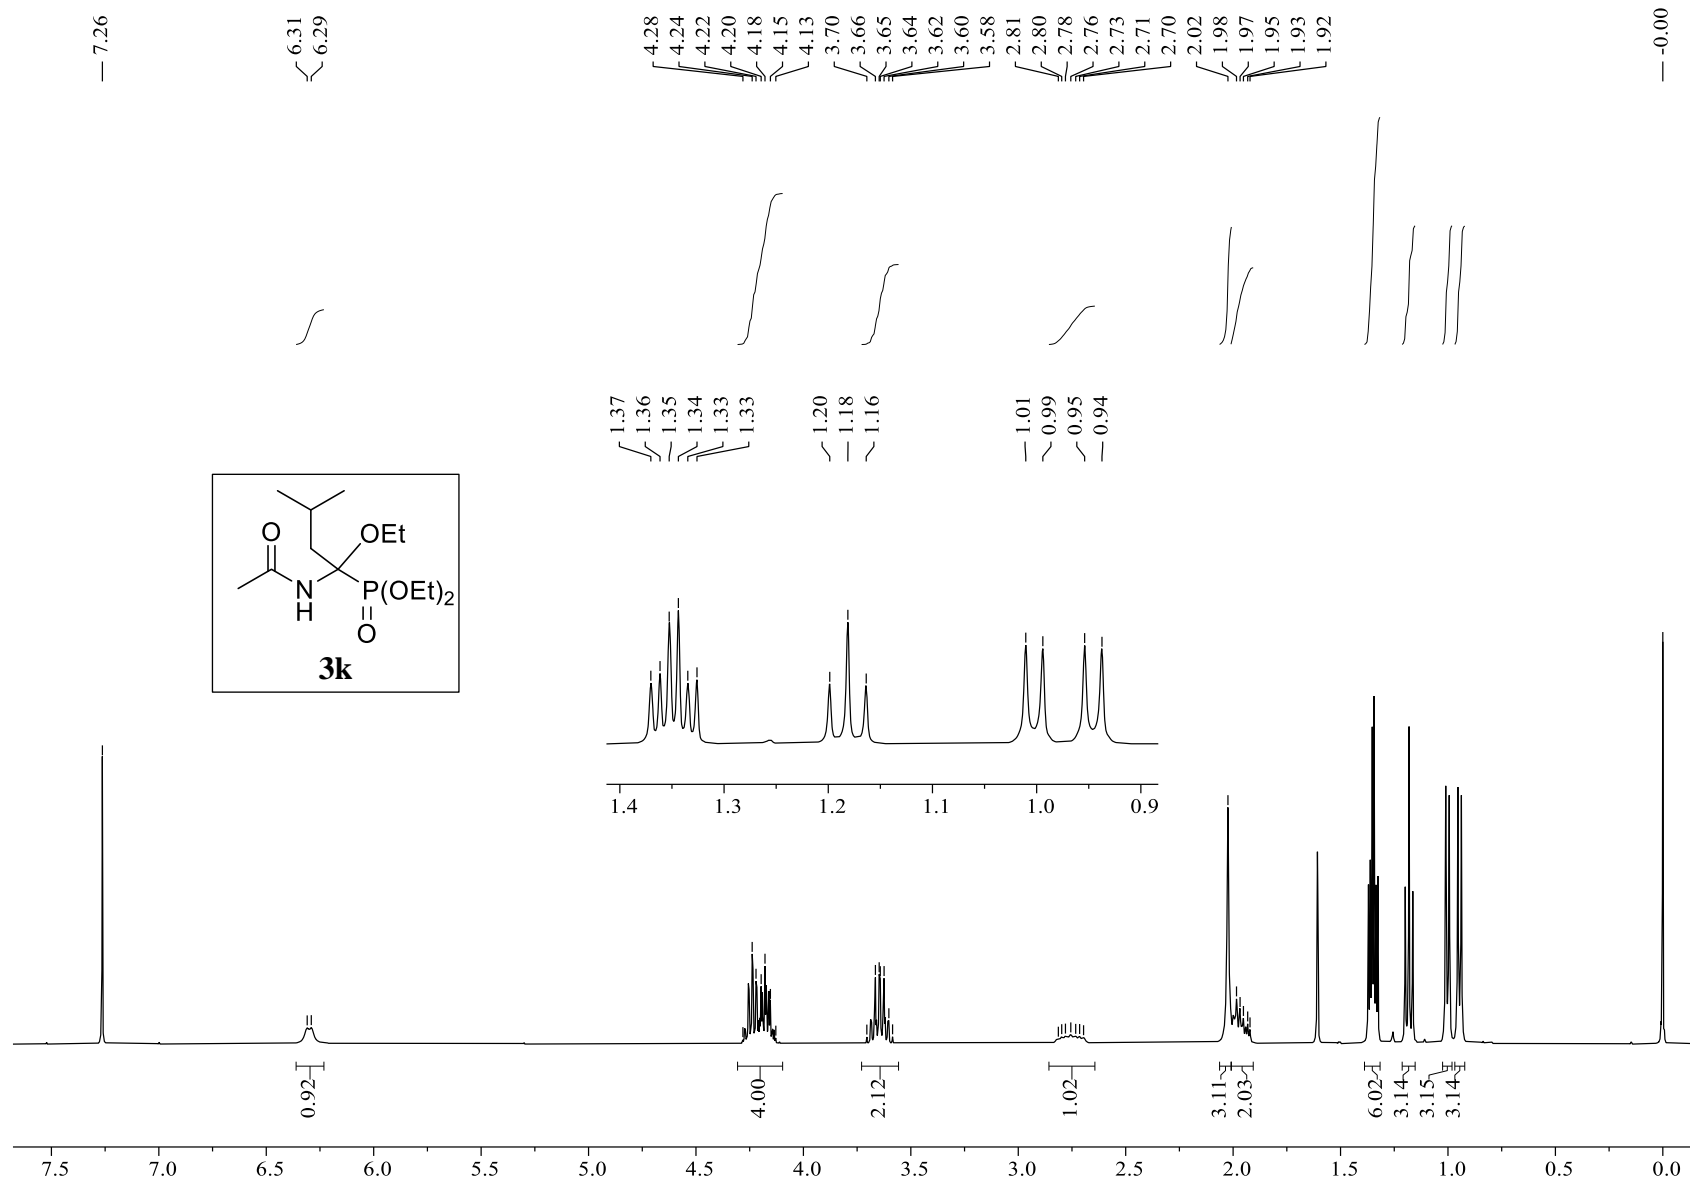

<sup>1</sup>H NMR spectrum of diethyl 1-(N-acetylamino)-1-ethoxy-3-methylbutylphosphonate (**3k**); 400 MHz/CDCl<sub>3</sub>/TMS; δ (ppm).

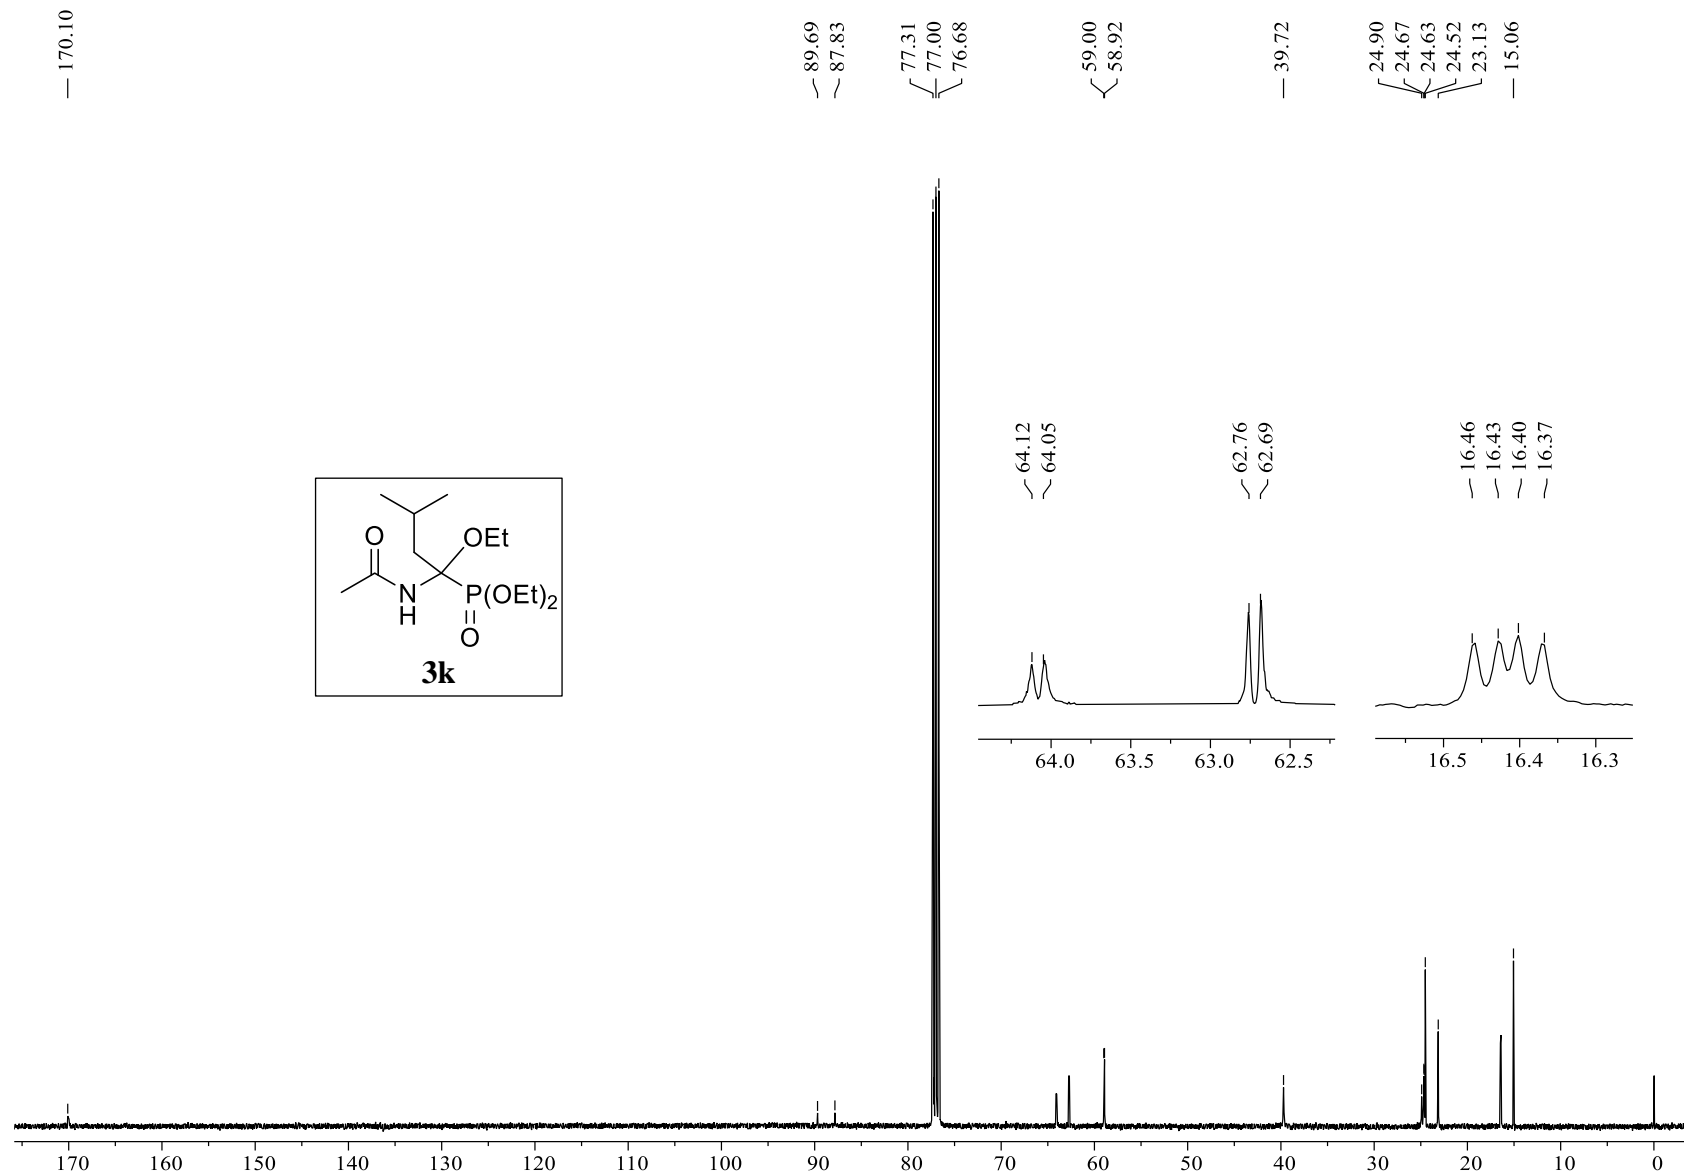

<sup>13</sup>C NMR spectrum of *diethyl 1-(N-acetylamino)-1-ethoxy-3-methylbutylphosphonate (3k)*; 100 MHz/<sup>13</sup>CDCl<sub>3</sub>/TMS; δ (ppm).

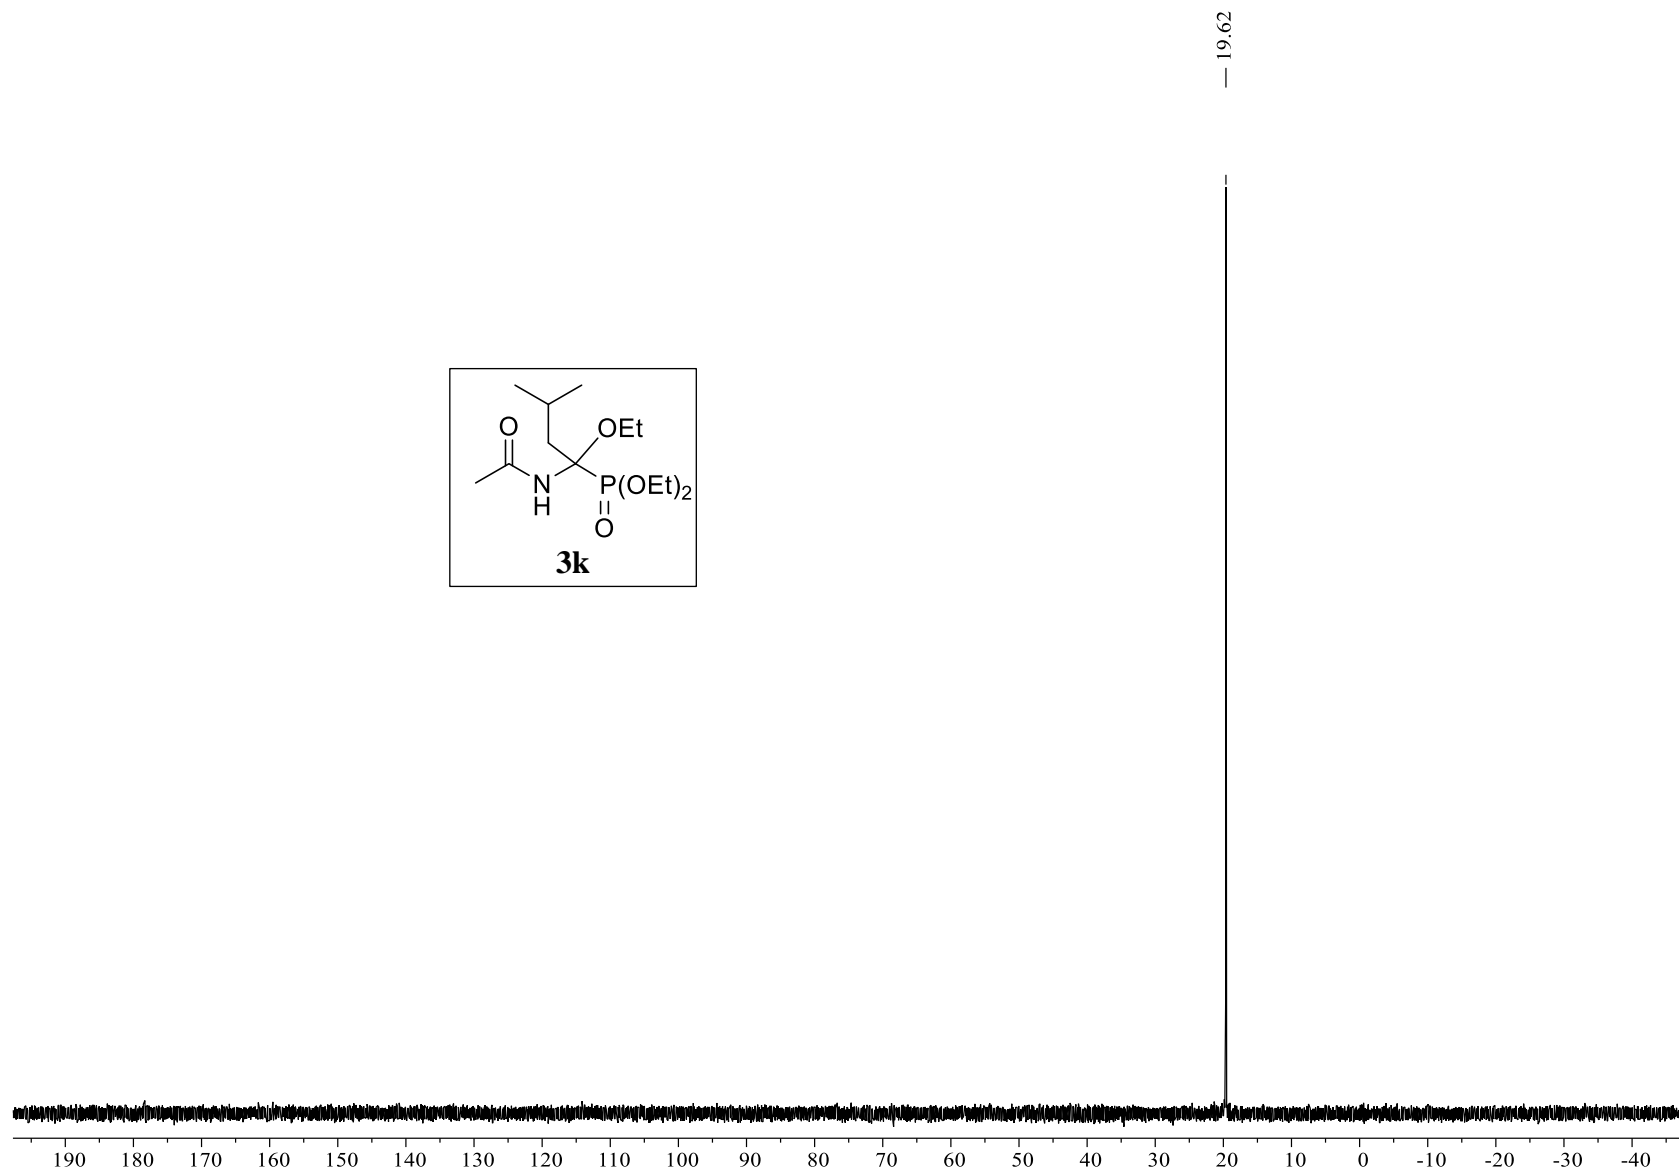

$^{31}\text{P}$  NMR spectrum of *diethyl 1-(N-acetylamino)-1-ethoxy-3-methylbutylphosphonate* (**3k**); 162 MHz/ $\text{CDCl}_3$ /TMS;  $\delta$  (ppm).

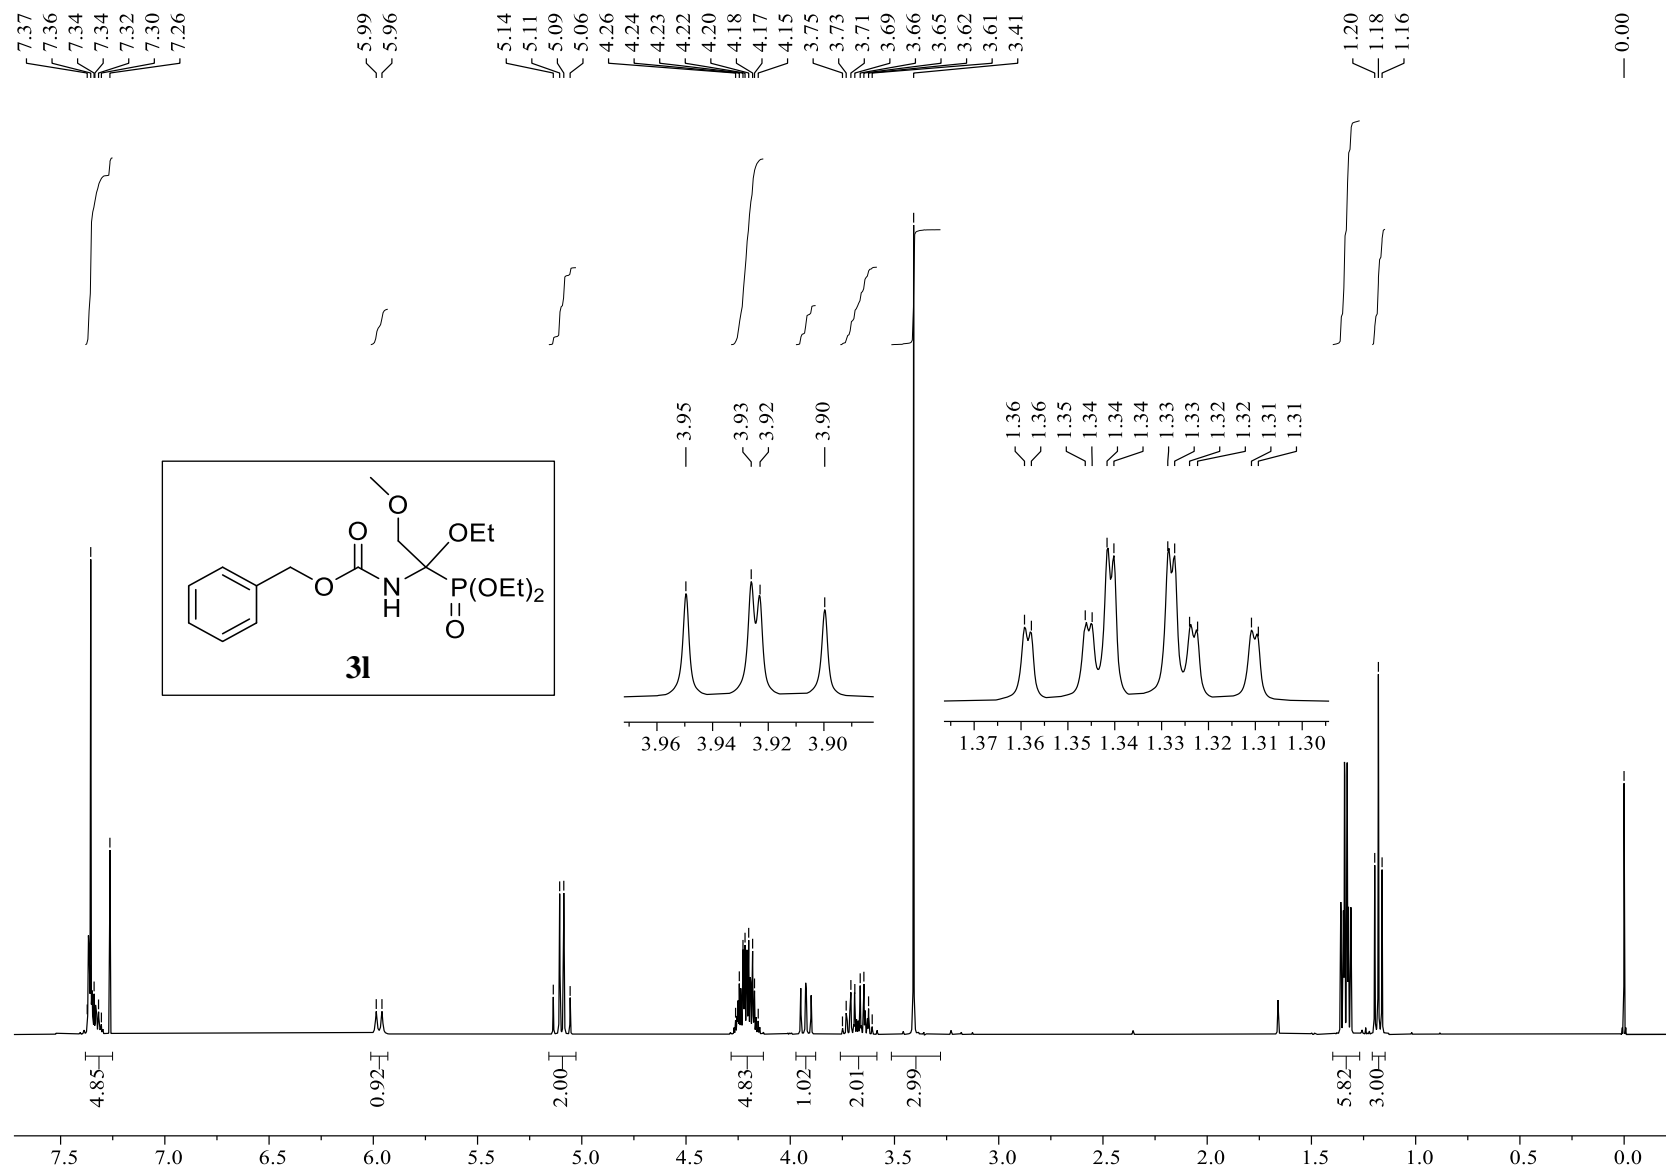

<sup>1</sup>H NMR spectrum of *diethyl 1-(N-benzyloxycarbonylamino)-1-ethoxy-2-methoxyethylphosphonate (3l)*; 400 MHz/CDCl<sub>3</sub>/TMS; δ (ppm).

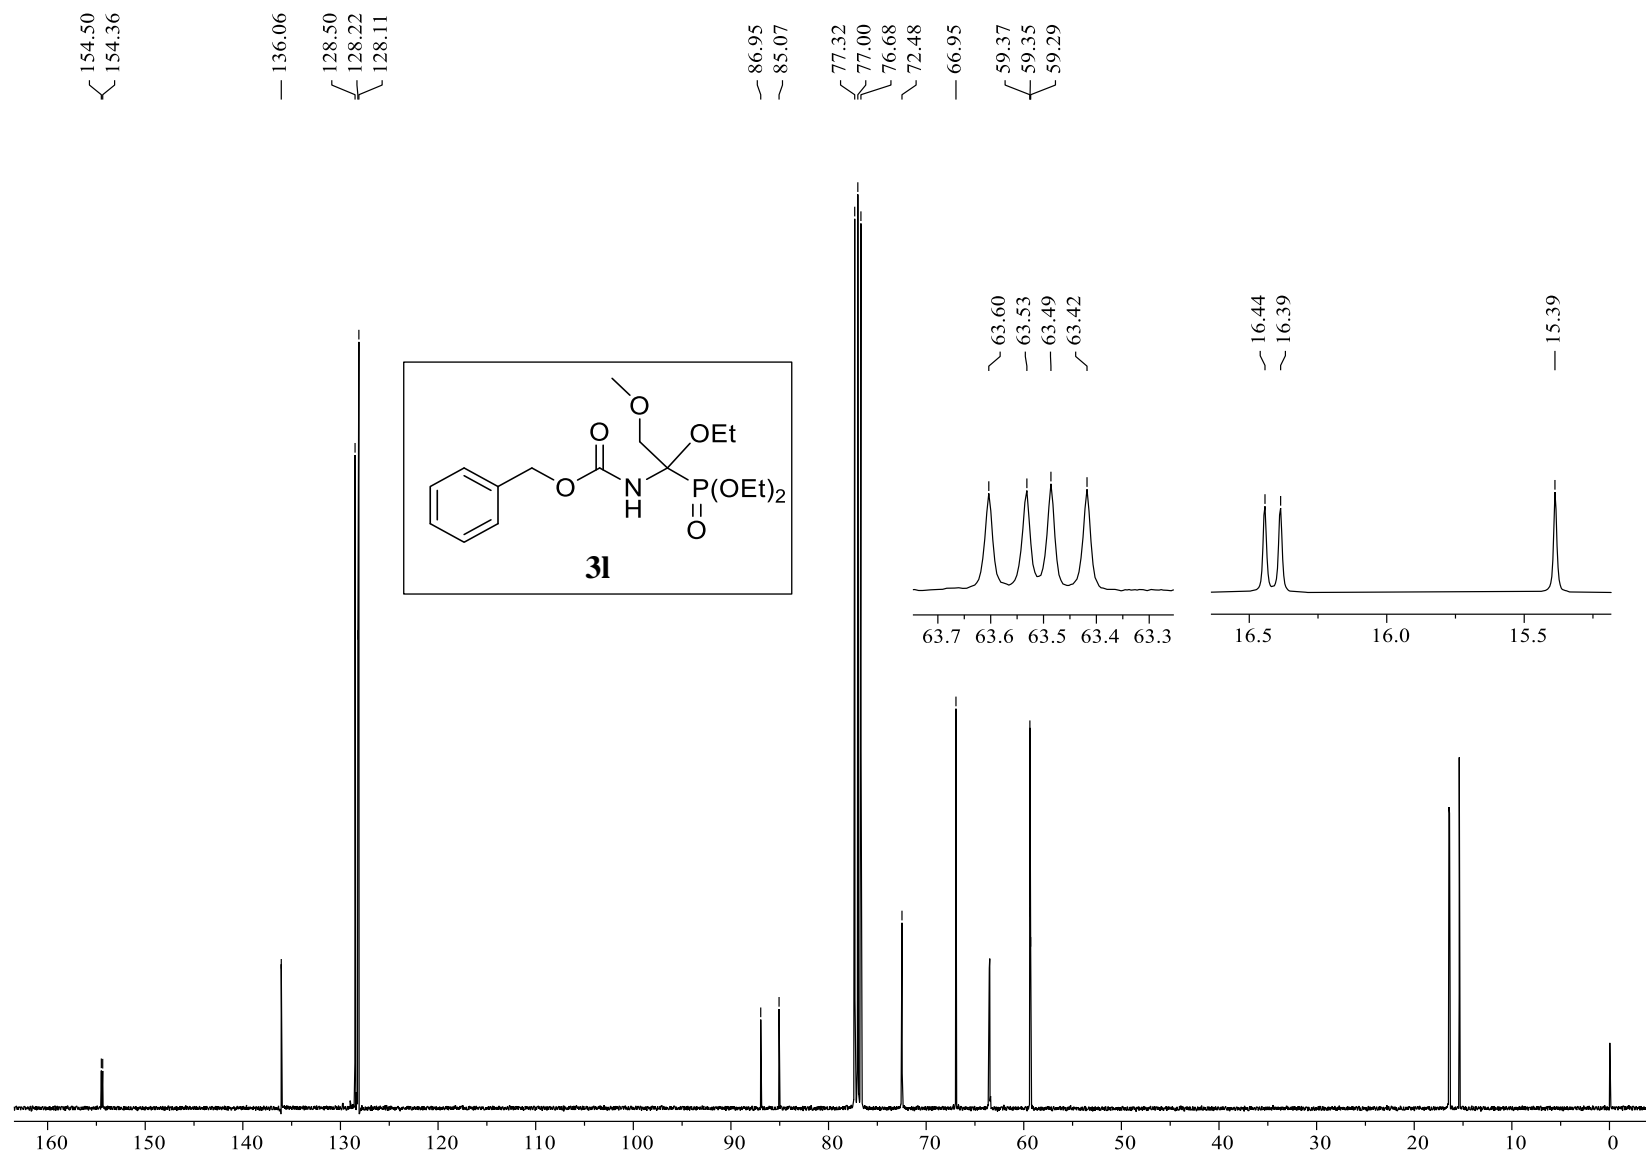

<sup>13</sup>C NMR spectrum of *diethyl 1-(N-benzyloxycarbonylamino)-1-ethoxy-2-methoxyethylphosphonate (3l)*; 100 MHz/<sup>13</sup>C<sub>2</sub>D<sub>2</sub>Cl<sub>2</sub>/TMS; δ (ppm).



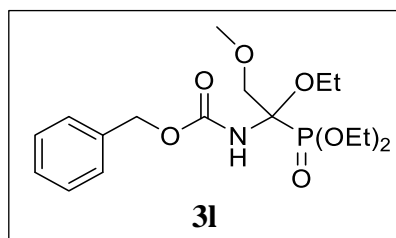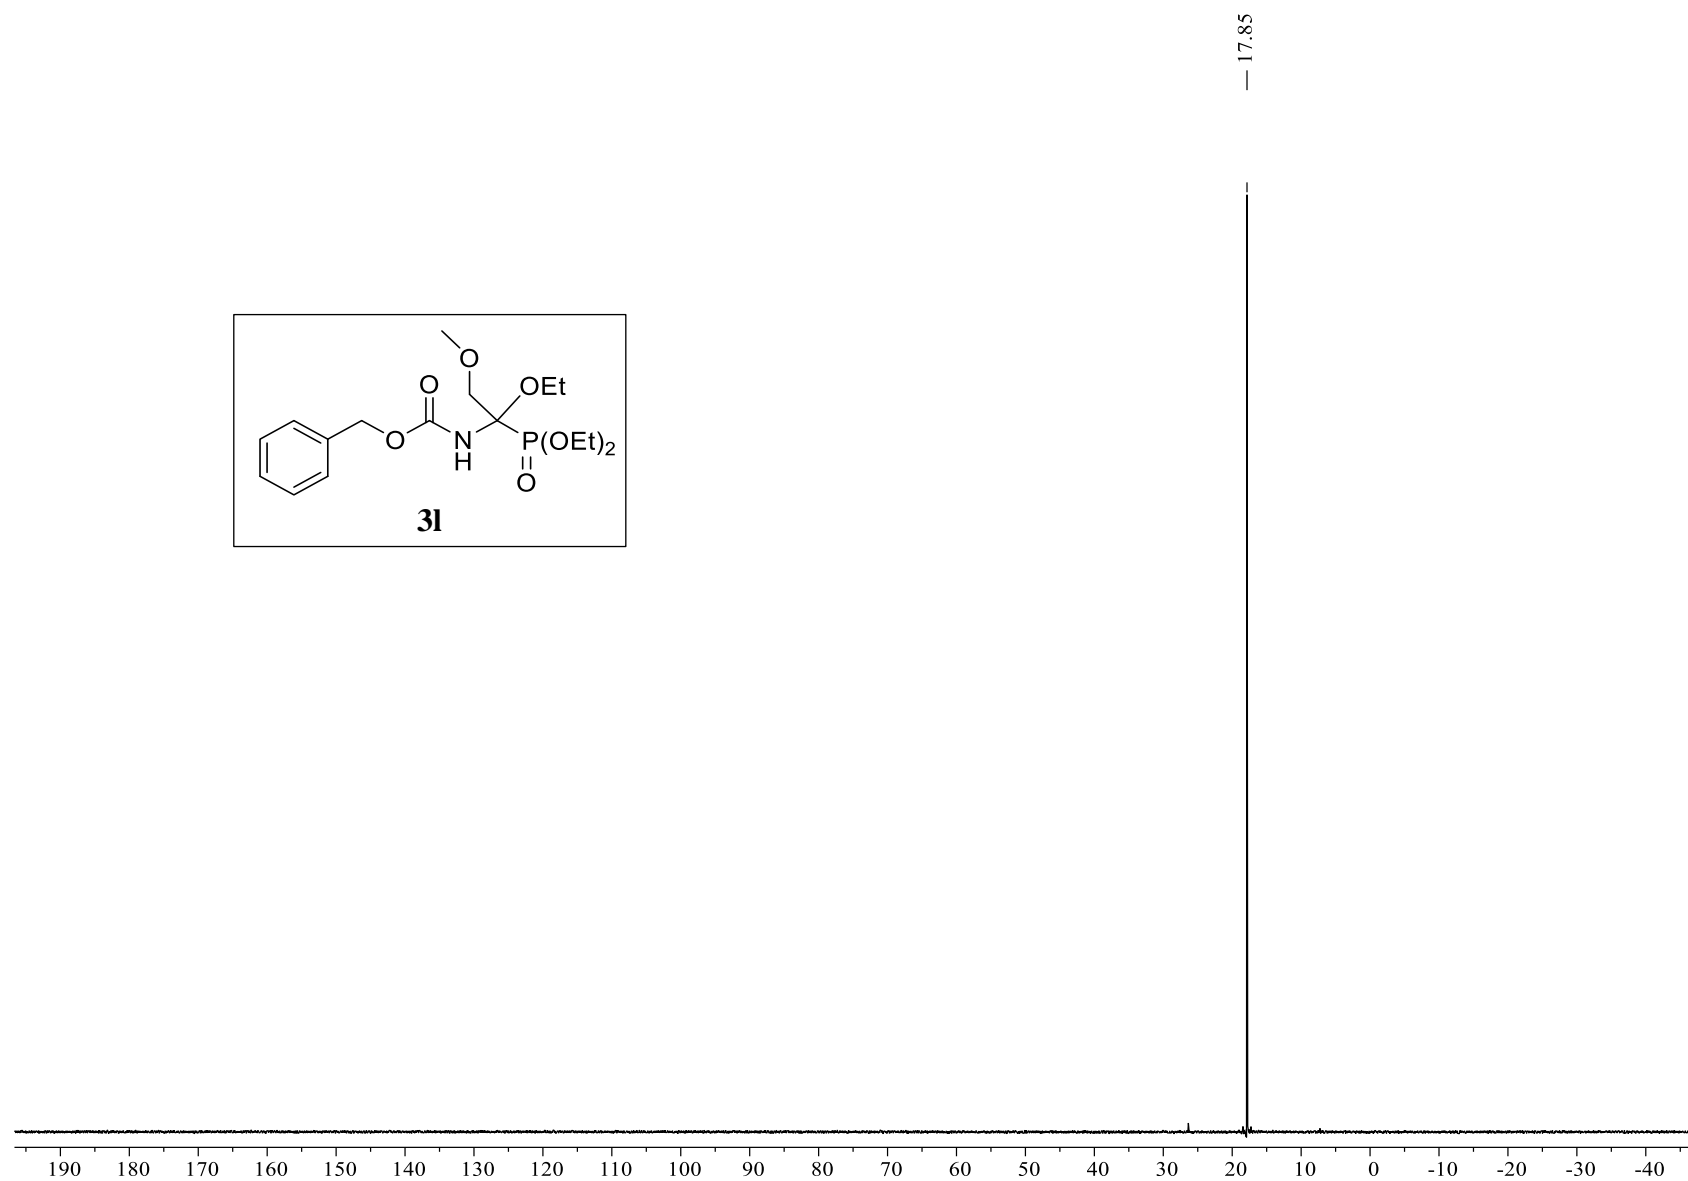

$^{31}\text{P}$  NMR spectrum of *diethyl 1-(N-benzyloxycarbonylamino)-1-ethoxy-2-methoxyethylphosphonate (31)*; 162 MHz/ $\text{CDCl}_3/\text{TMS}$ ;  $\delta$  (ppm).

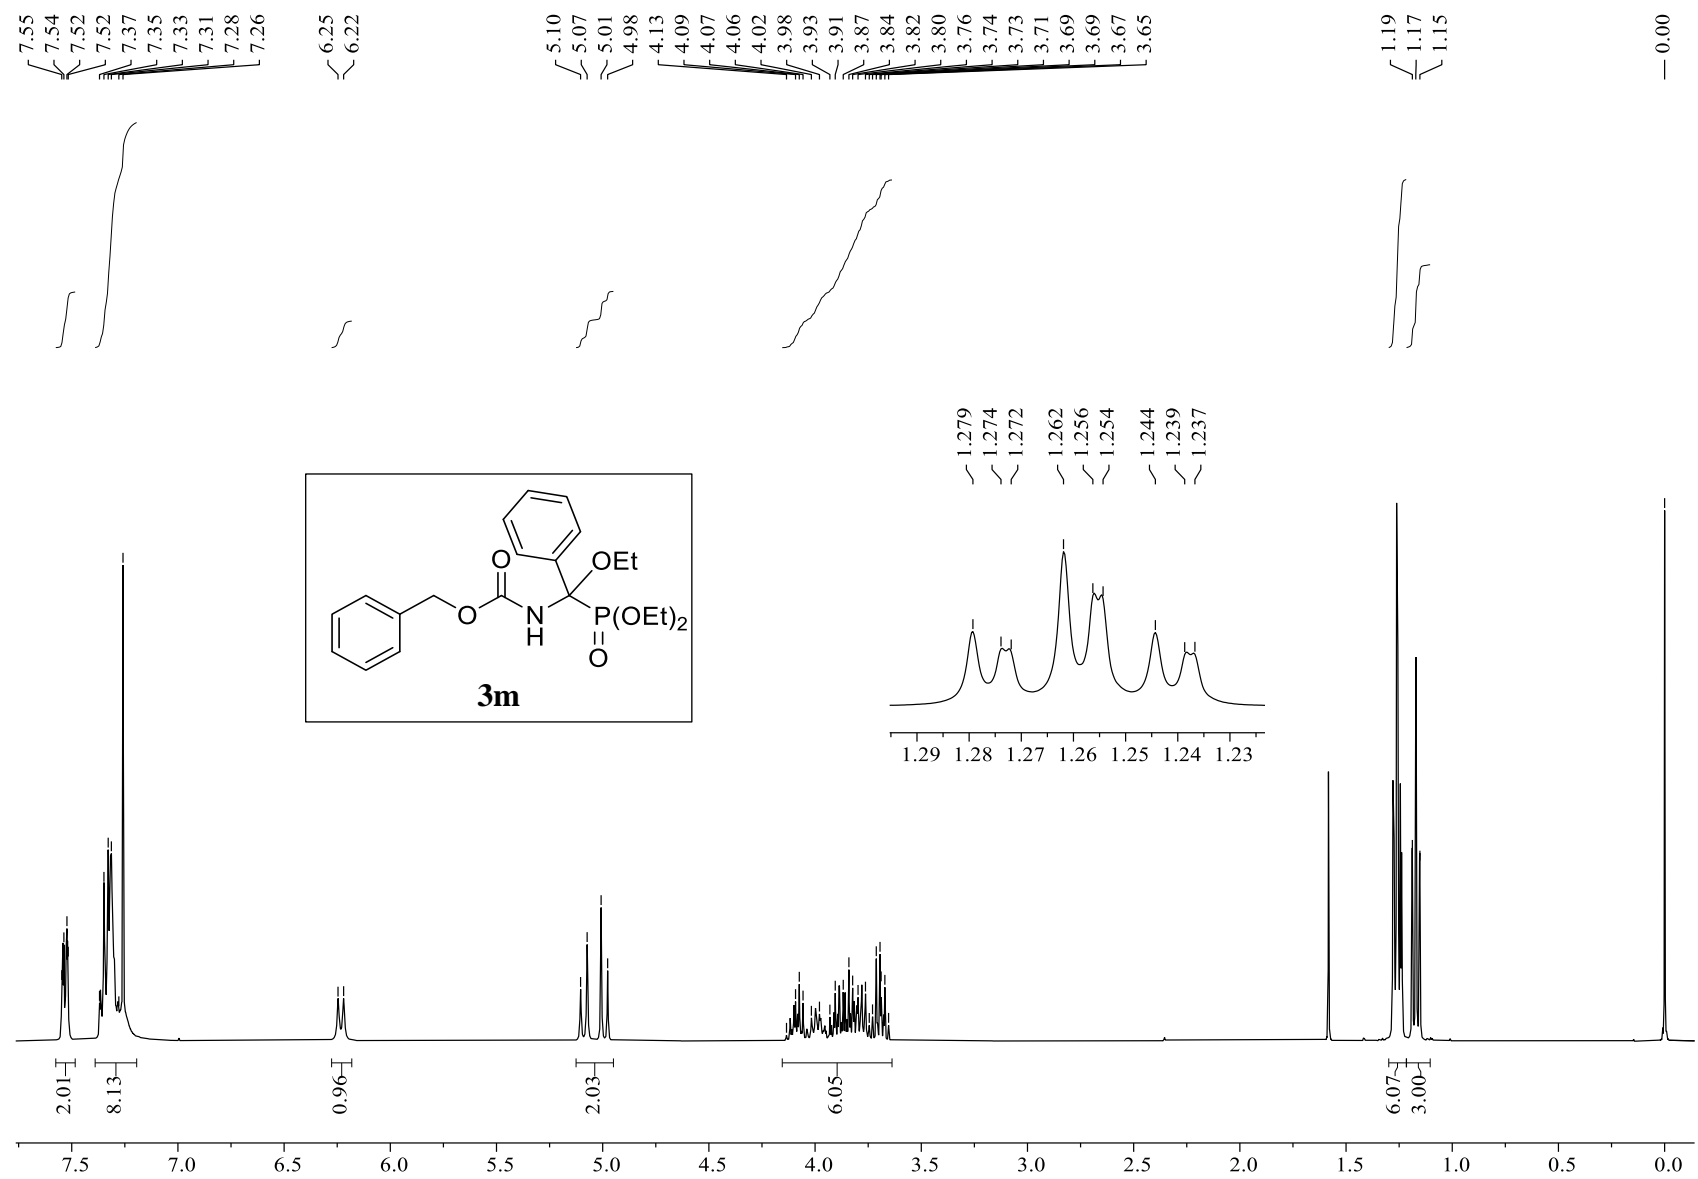

$^1\text{H}$  NMR spectrum of *diethyl 1-(N-benzyloxycarbonylamino)-1-ethoxy-1-phenylmethylphosphonate (3m)*; 400 MHz/ $\text{CDCl}_3/\text{TMS}$ ;  $\delta$  (ppm).

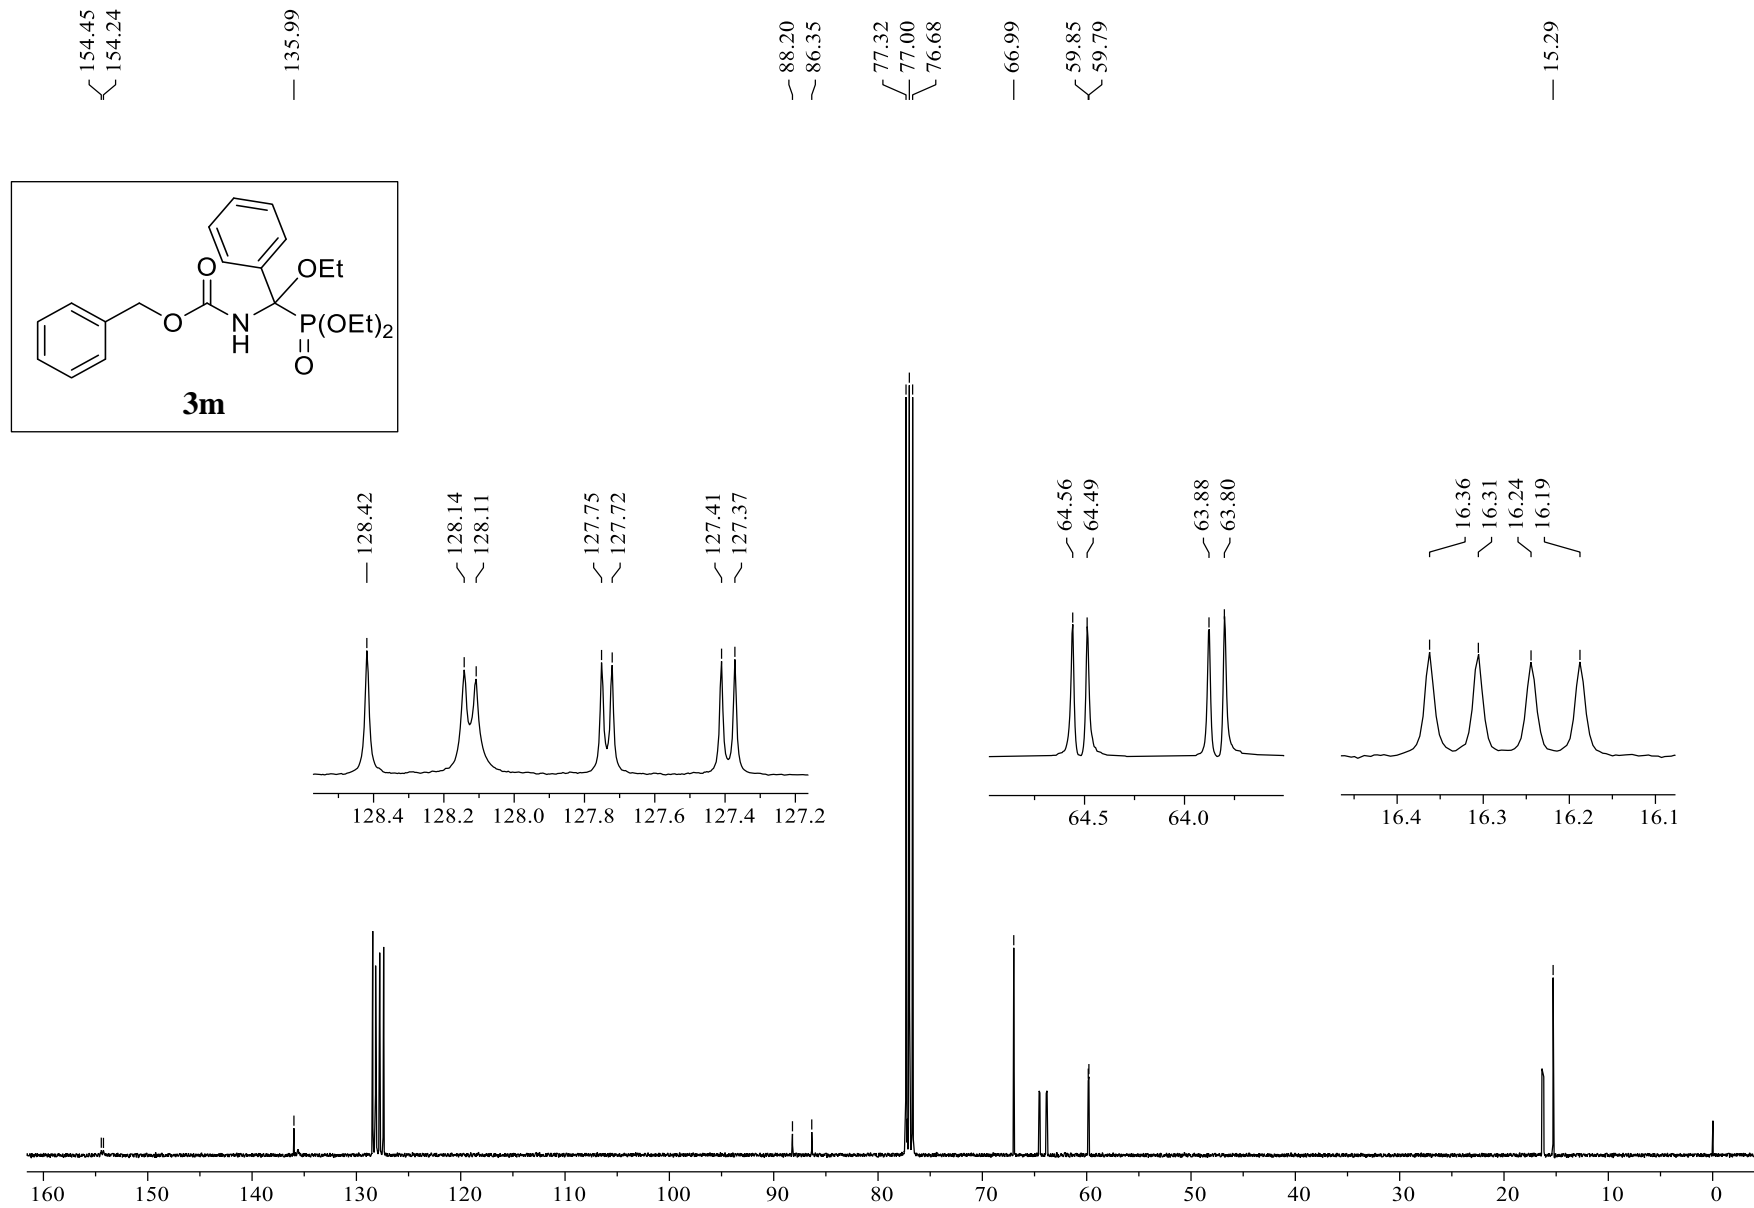

<sup>13</sup>C NMR spectrum of *diethyl 1-(N-benzyloxycarbonylamino)-1-ethoxy-1-phenylmethylphosphonate (3m)*; 100 MHz/CDCl<sub>3</sub>/TMS; δ (ppm).

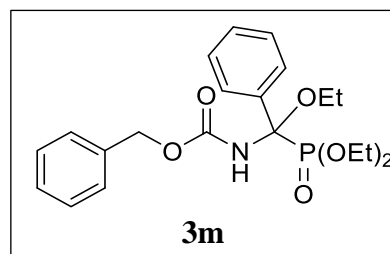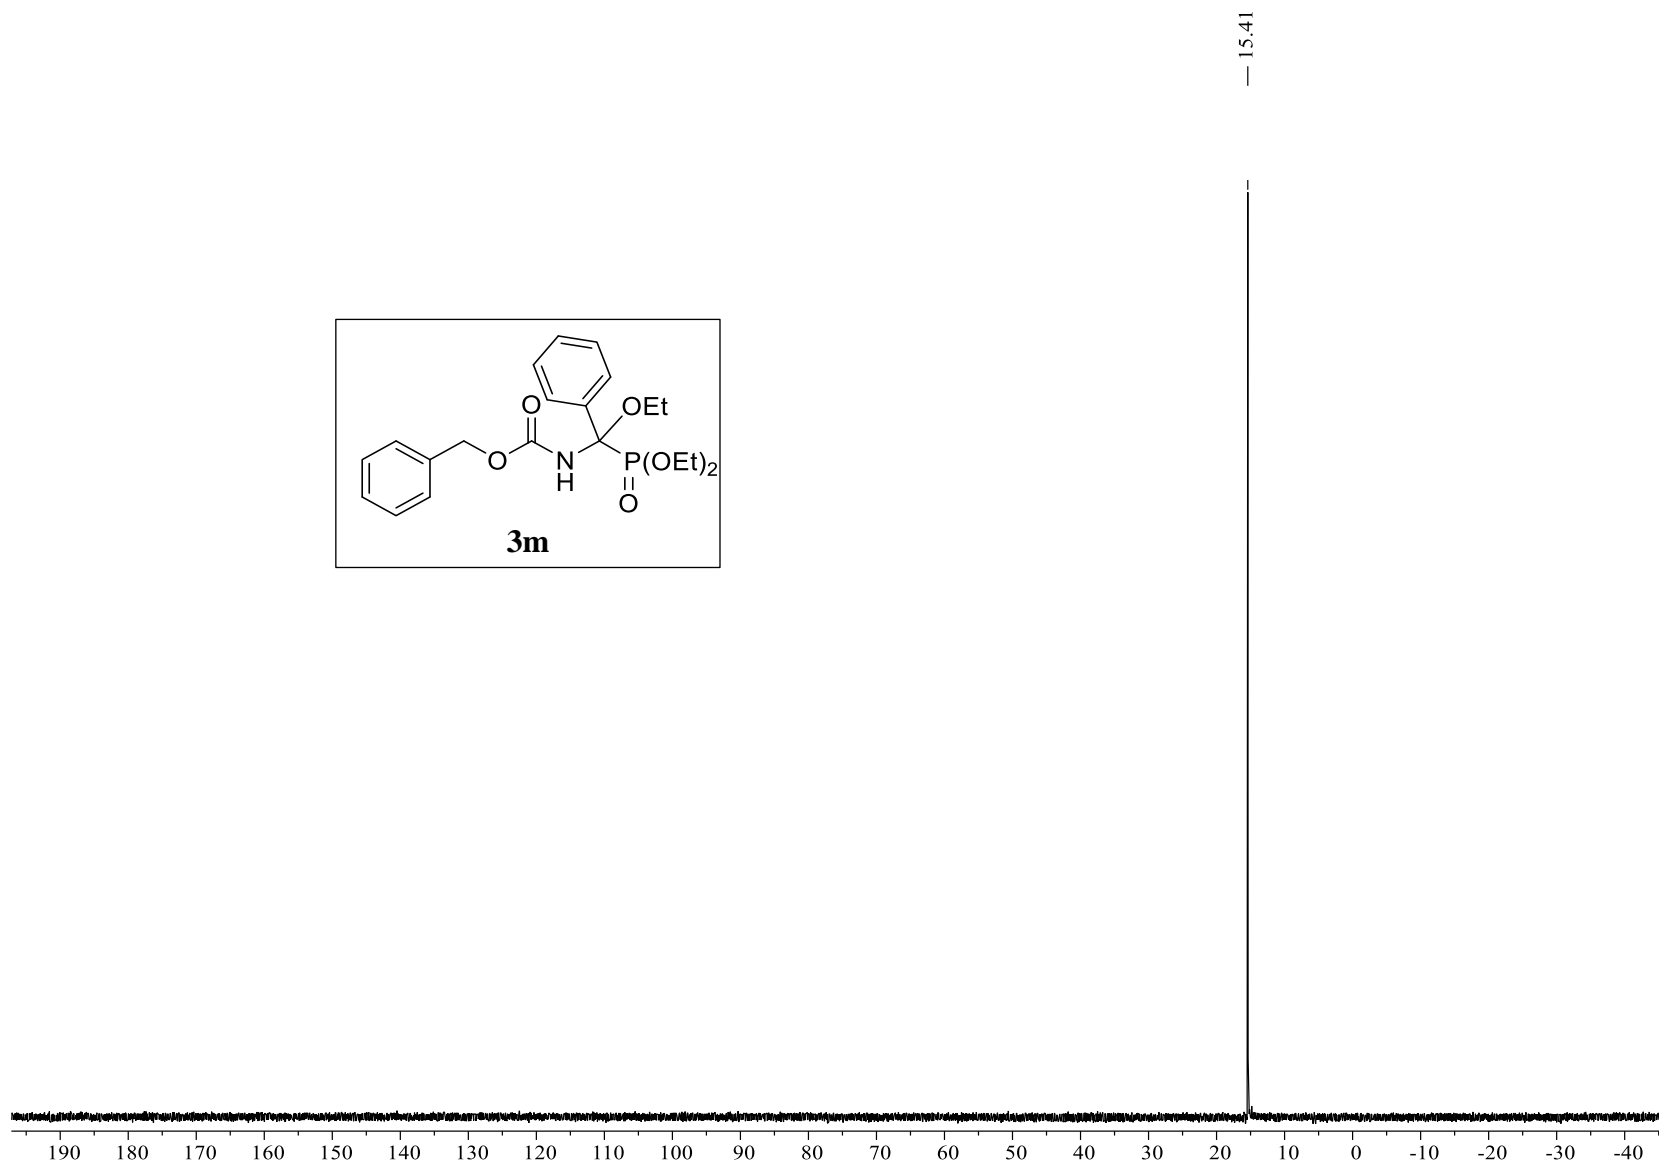

$^{31}\text{P}$  NMR spectrum of *diethyl 1-(N-benzyloxycarbonylamino)-1-ethoxy-1-phenylmethylphosphonate (3m)*; 162 MHz/ $\text{CDCl}_3/\text{TMS}$ ;  $\delta$  (ppm).

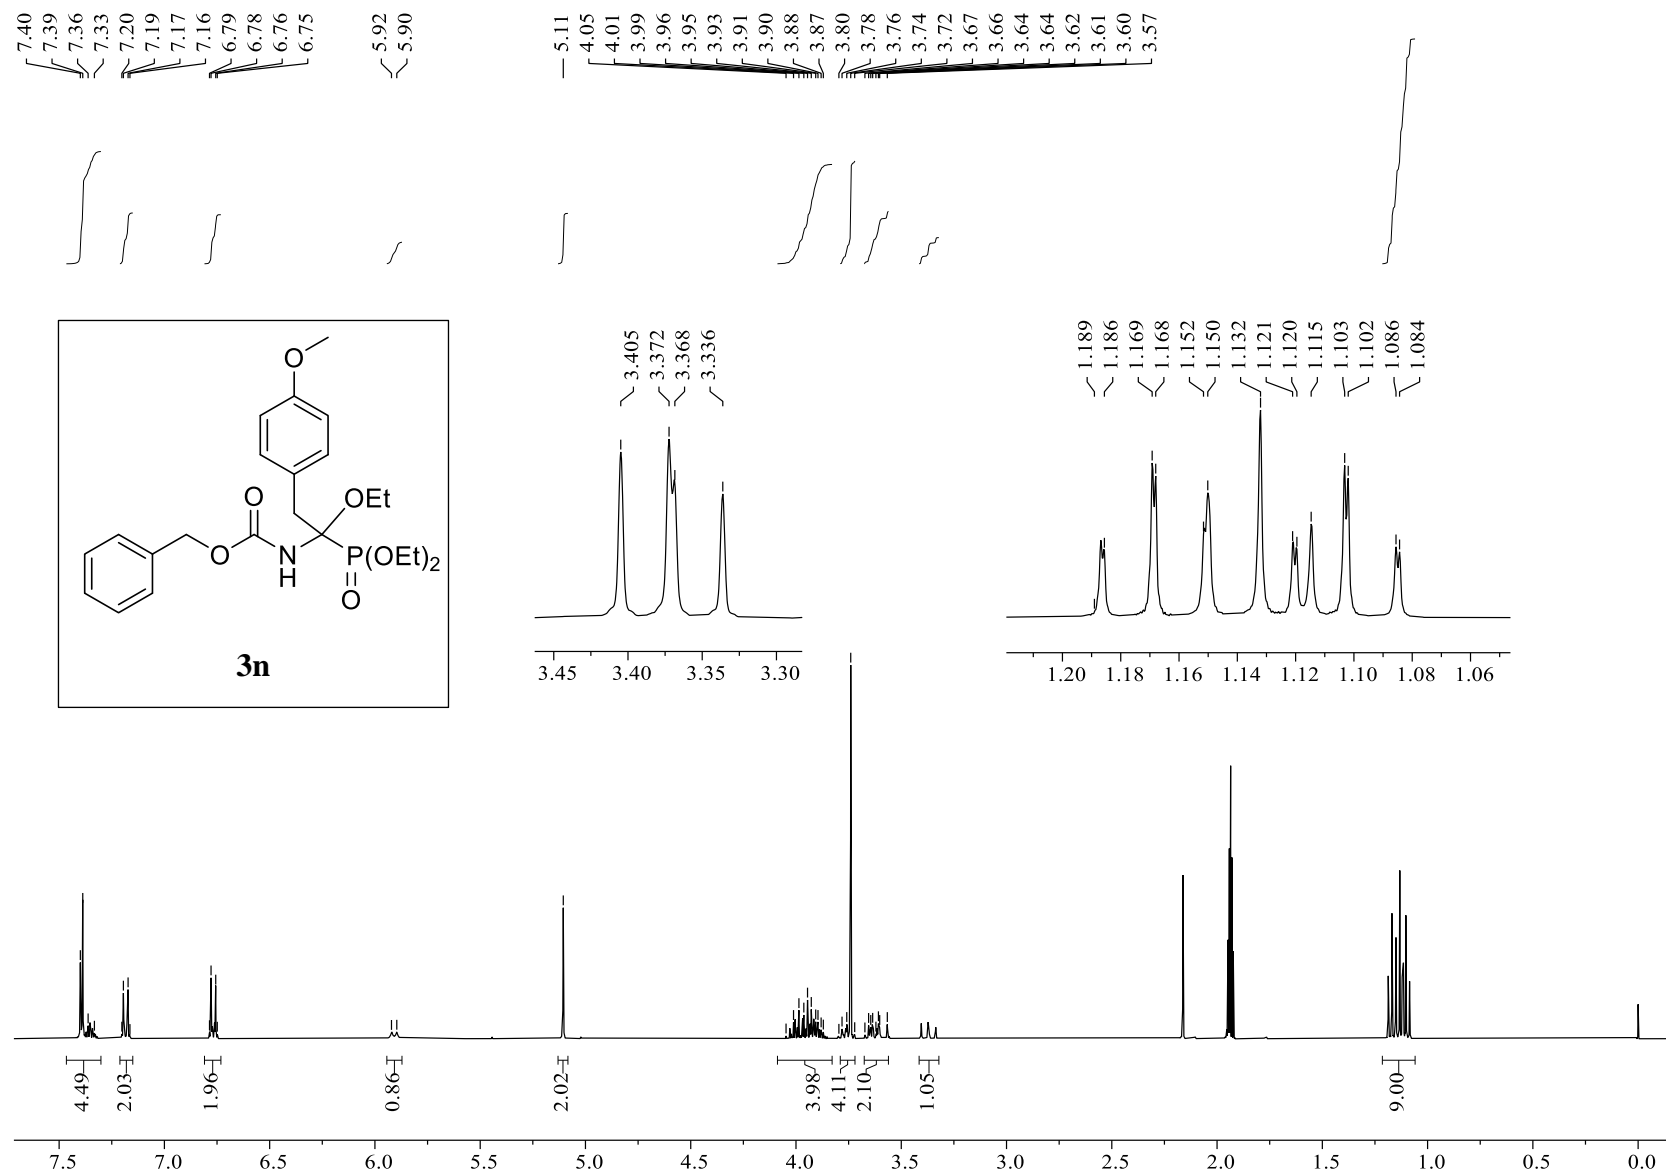

<sup>1</sup>H NMR spectrum of *diethyl 1-(N-benzyloxycarbonylamino)-1-ethoxy-2-(4-methoxyphenyl)ethylphosphonate (3n)*; 400 MHz/CD<sub>3</sub>CN/TMS;  $\delta$  (ppm).

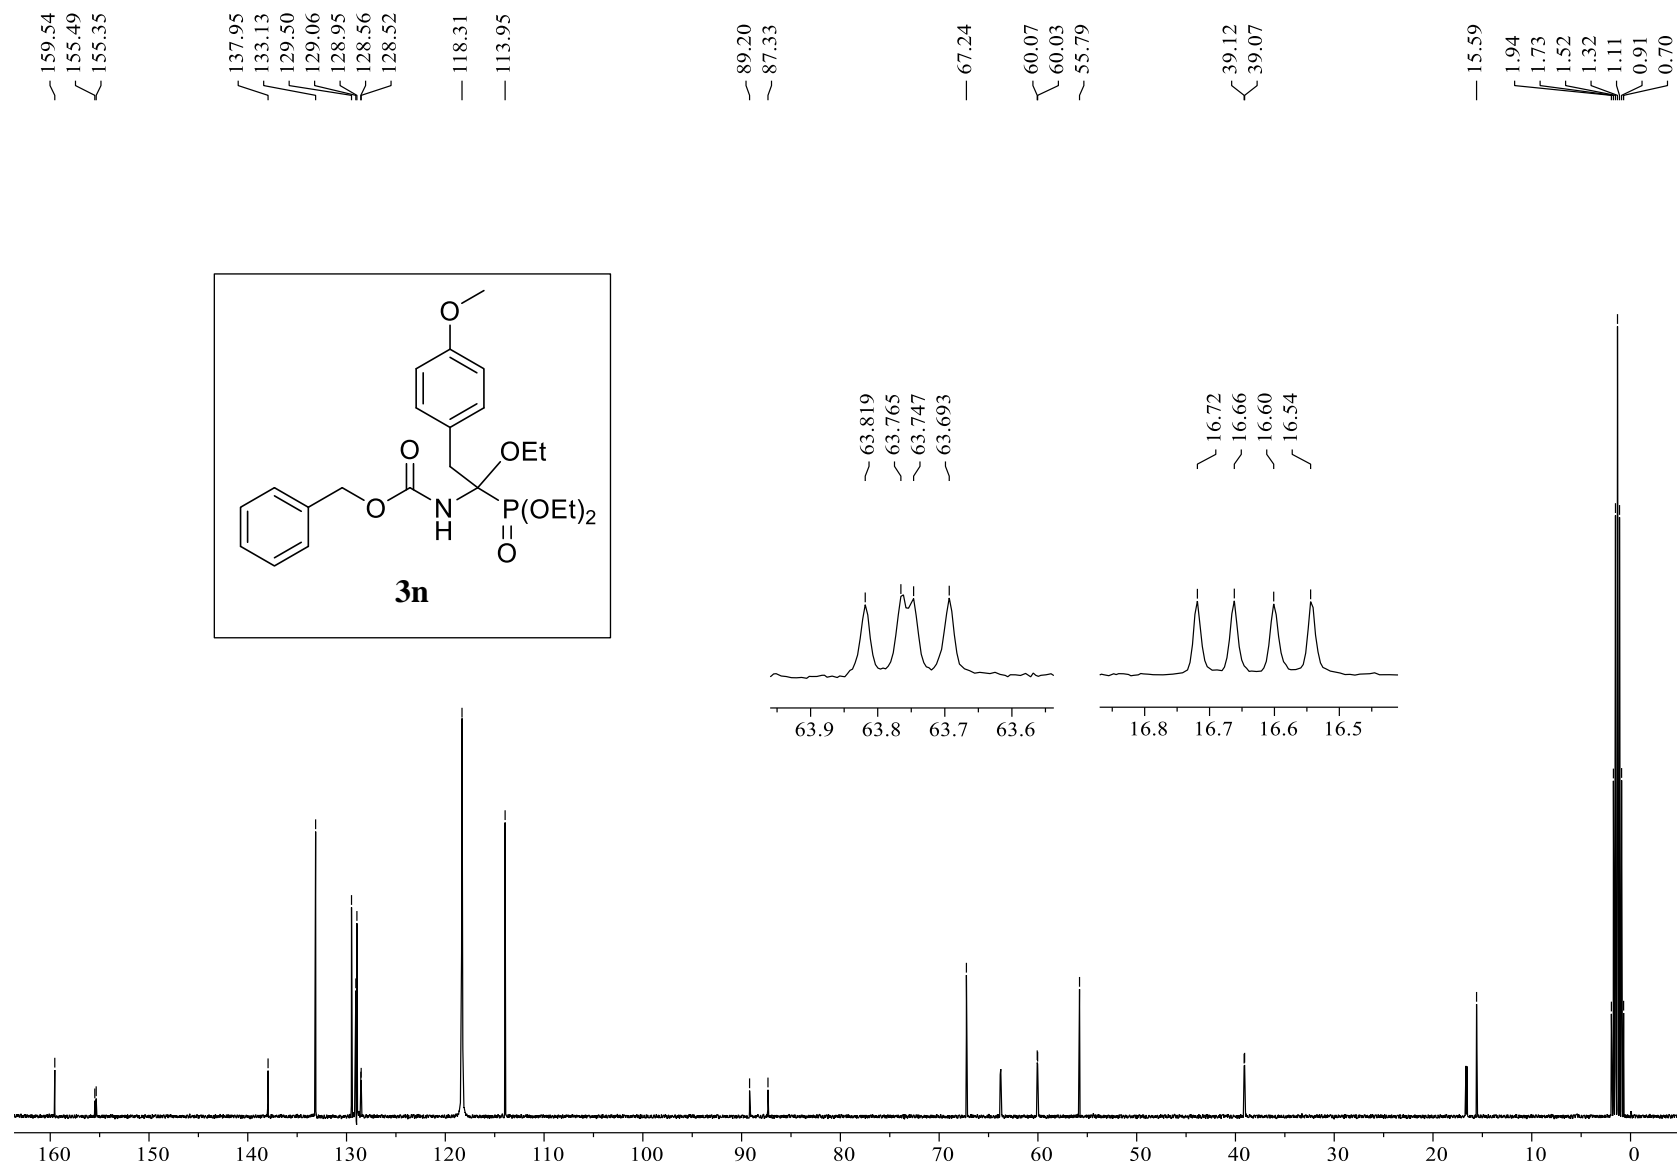

<sup>13</sup>C NMR spectrum of *diethyl 1-(N-benzyloxycarbonylamino)-1-ethoxy-2-(4-methoxyphenyl)ethylphosphonate (3n)*; 100 MHz/CD<sub>3</sub>CN/TMS; δ (ppm).

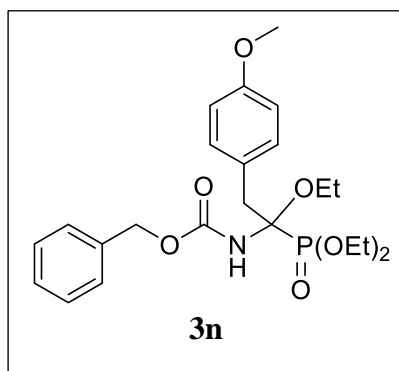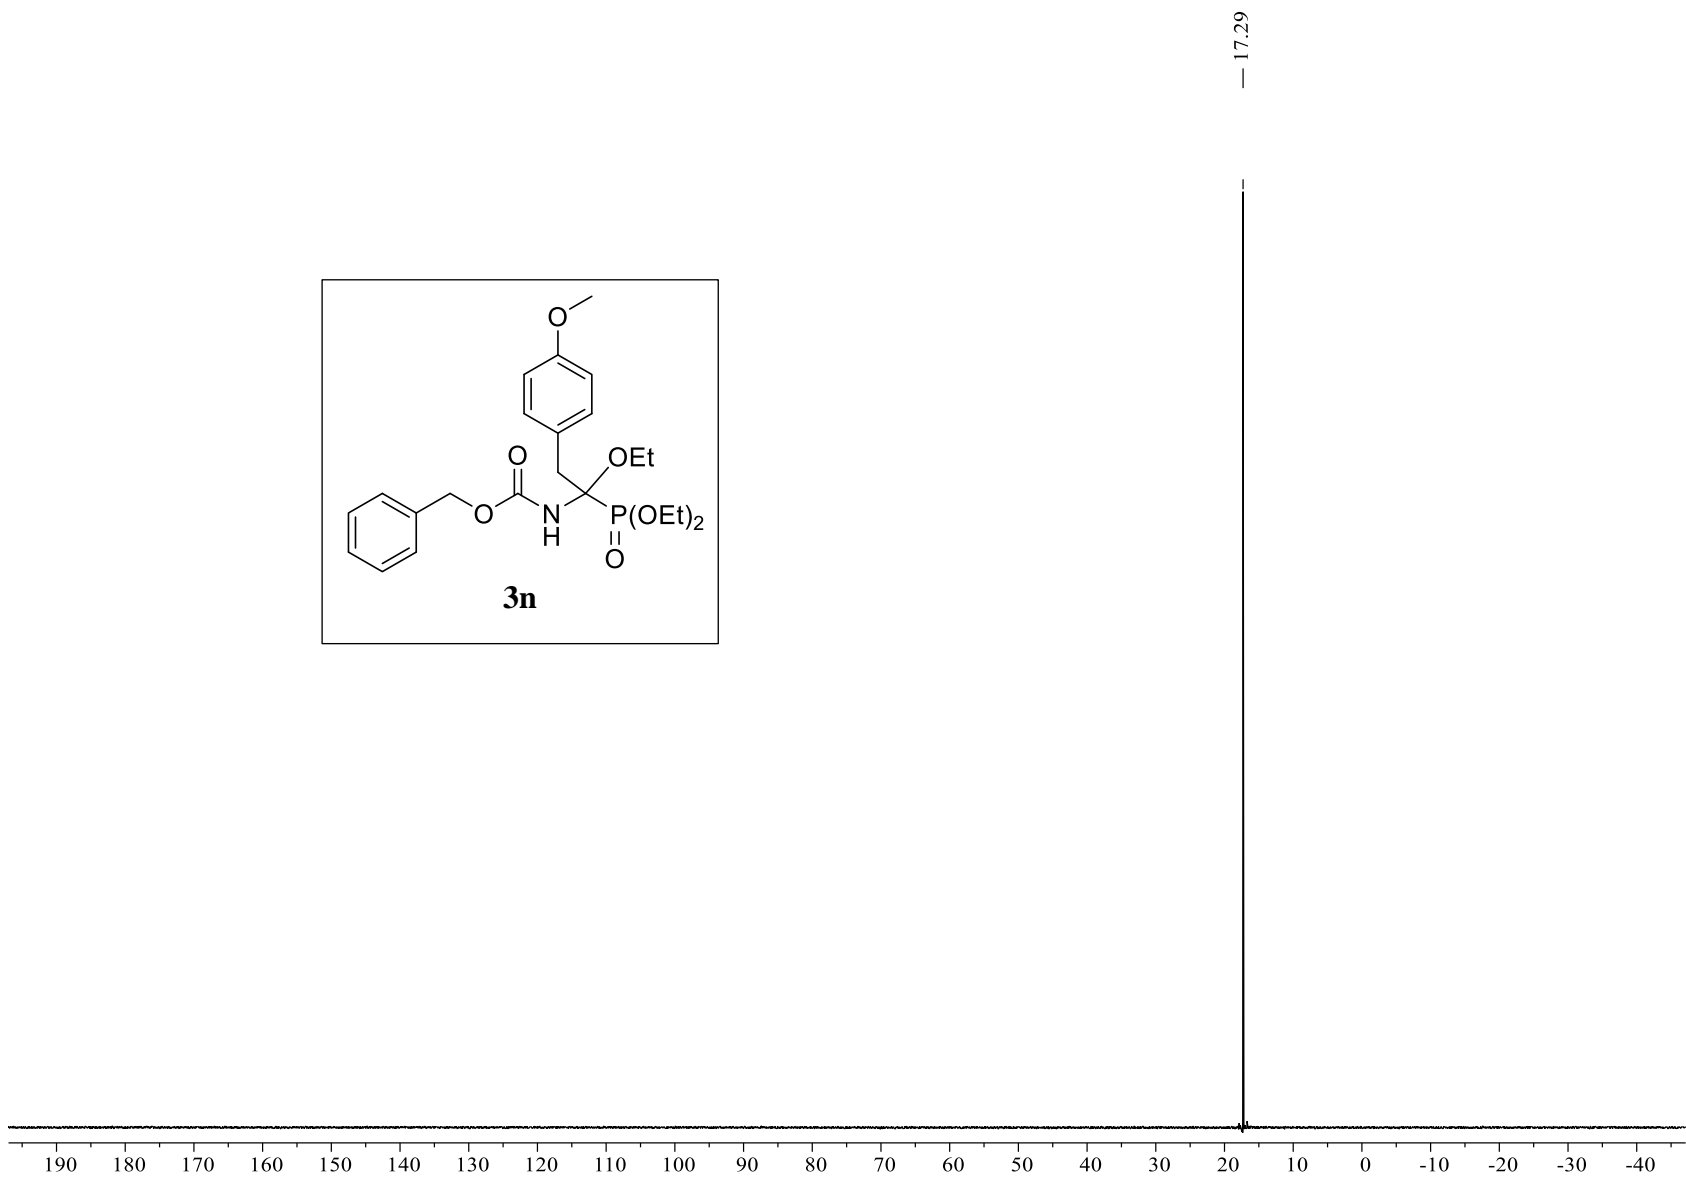

$^{31}\text{P}$  NMR spectrum of *diethyl 1-(N-benzyloxycarbonylamino)-1-ethoxy-2-(4-methoxyphenyl)ethylphosphonate (3n)*; 162 MHz/  $\text{CD}_3\text{CN/TMS}$ ;  $\delta$  (ppm).

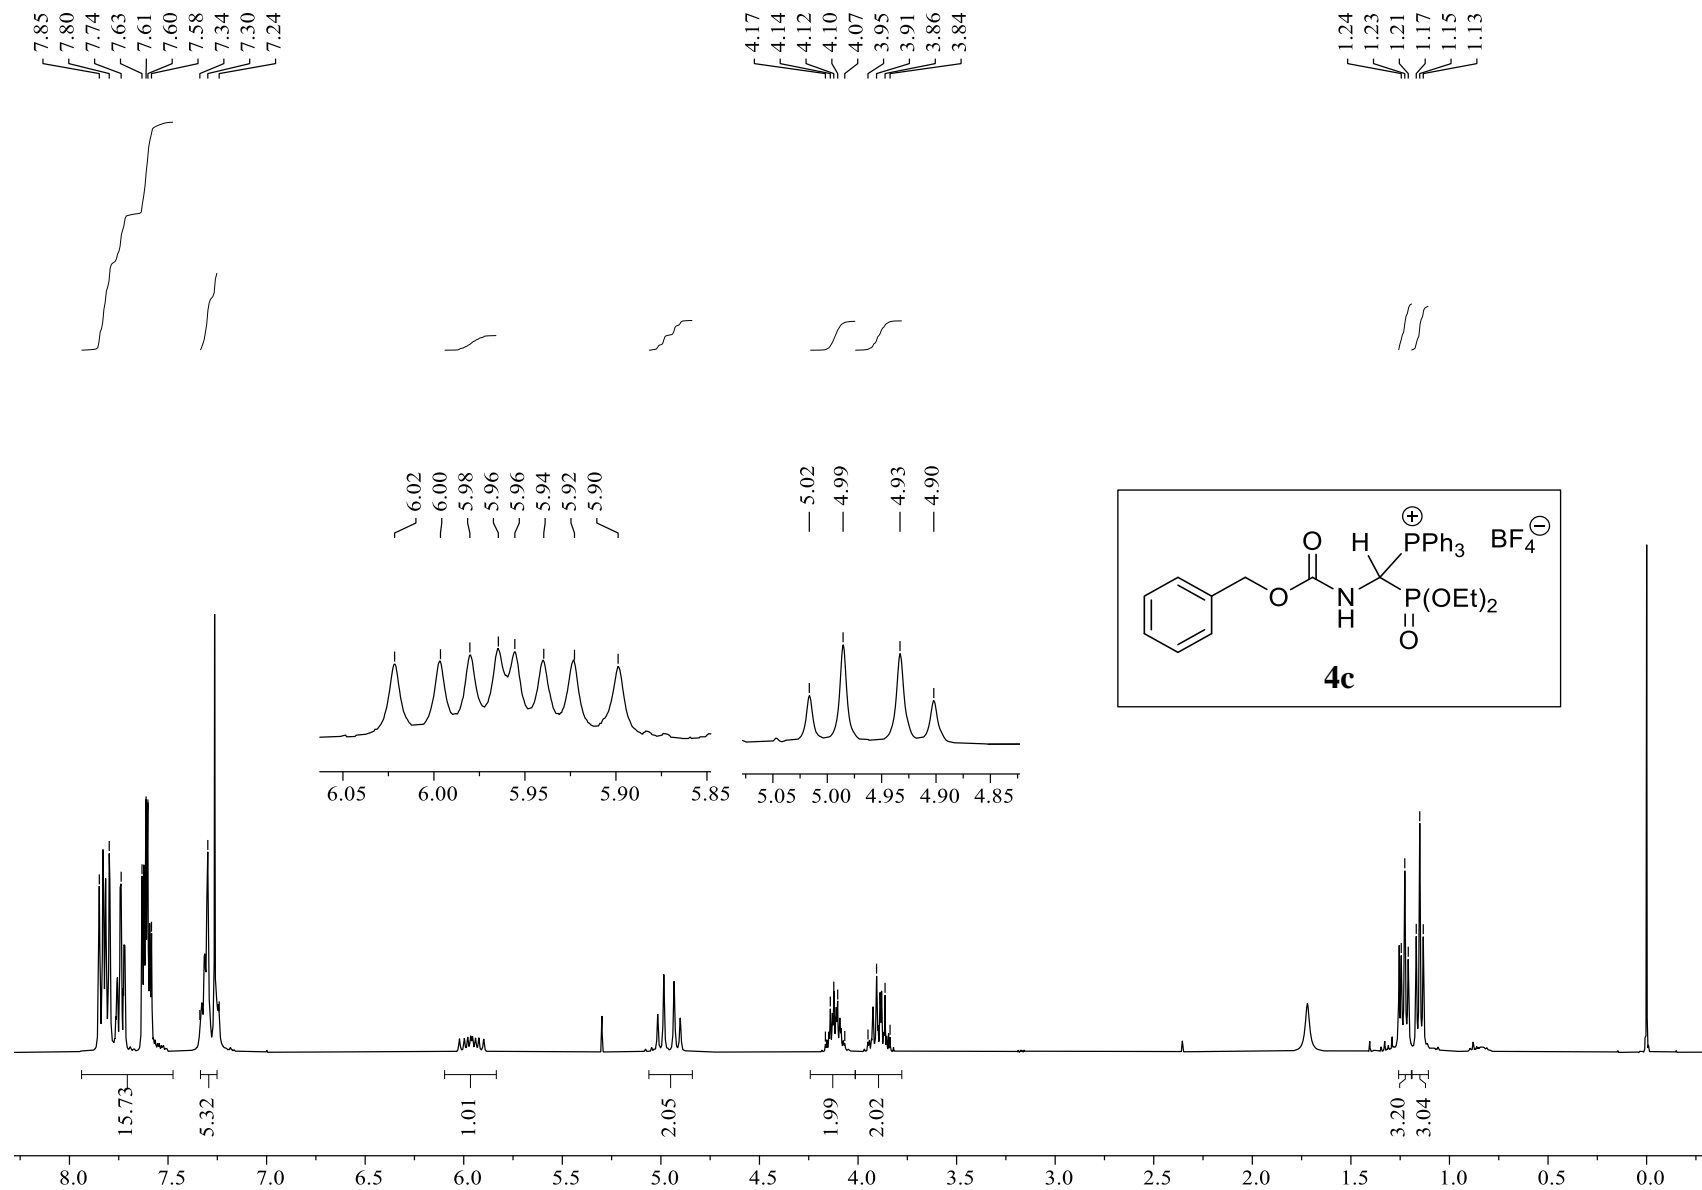

<sup>1</sup>H NMR spectrum of diethyl 1-(*N*-benzyloxycarbonylamino)-1-triphenylphosphoniummethylphosphonate (**4c**); 400 MHz/CDCl<sub>3</sub>/TMS; δ (ppm).



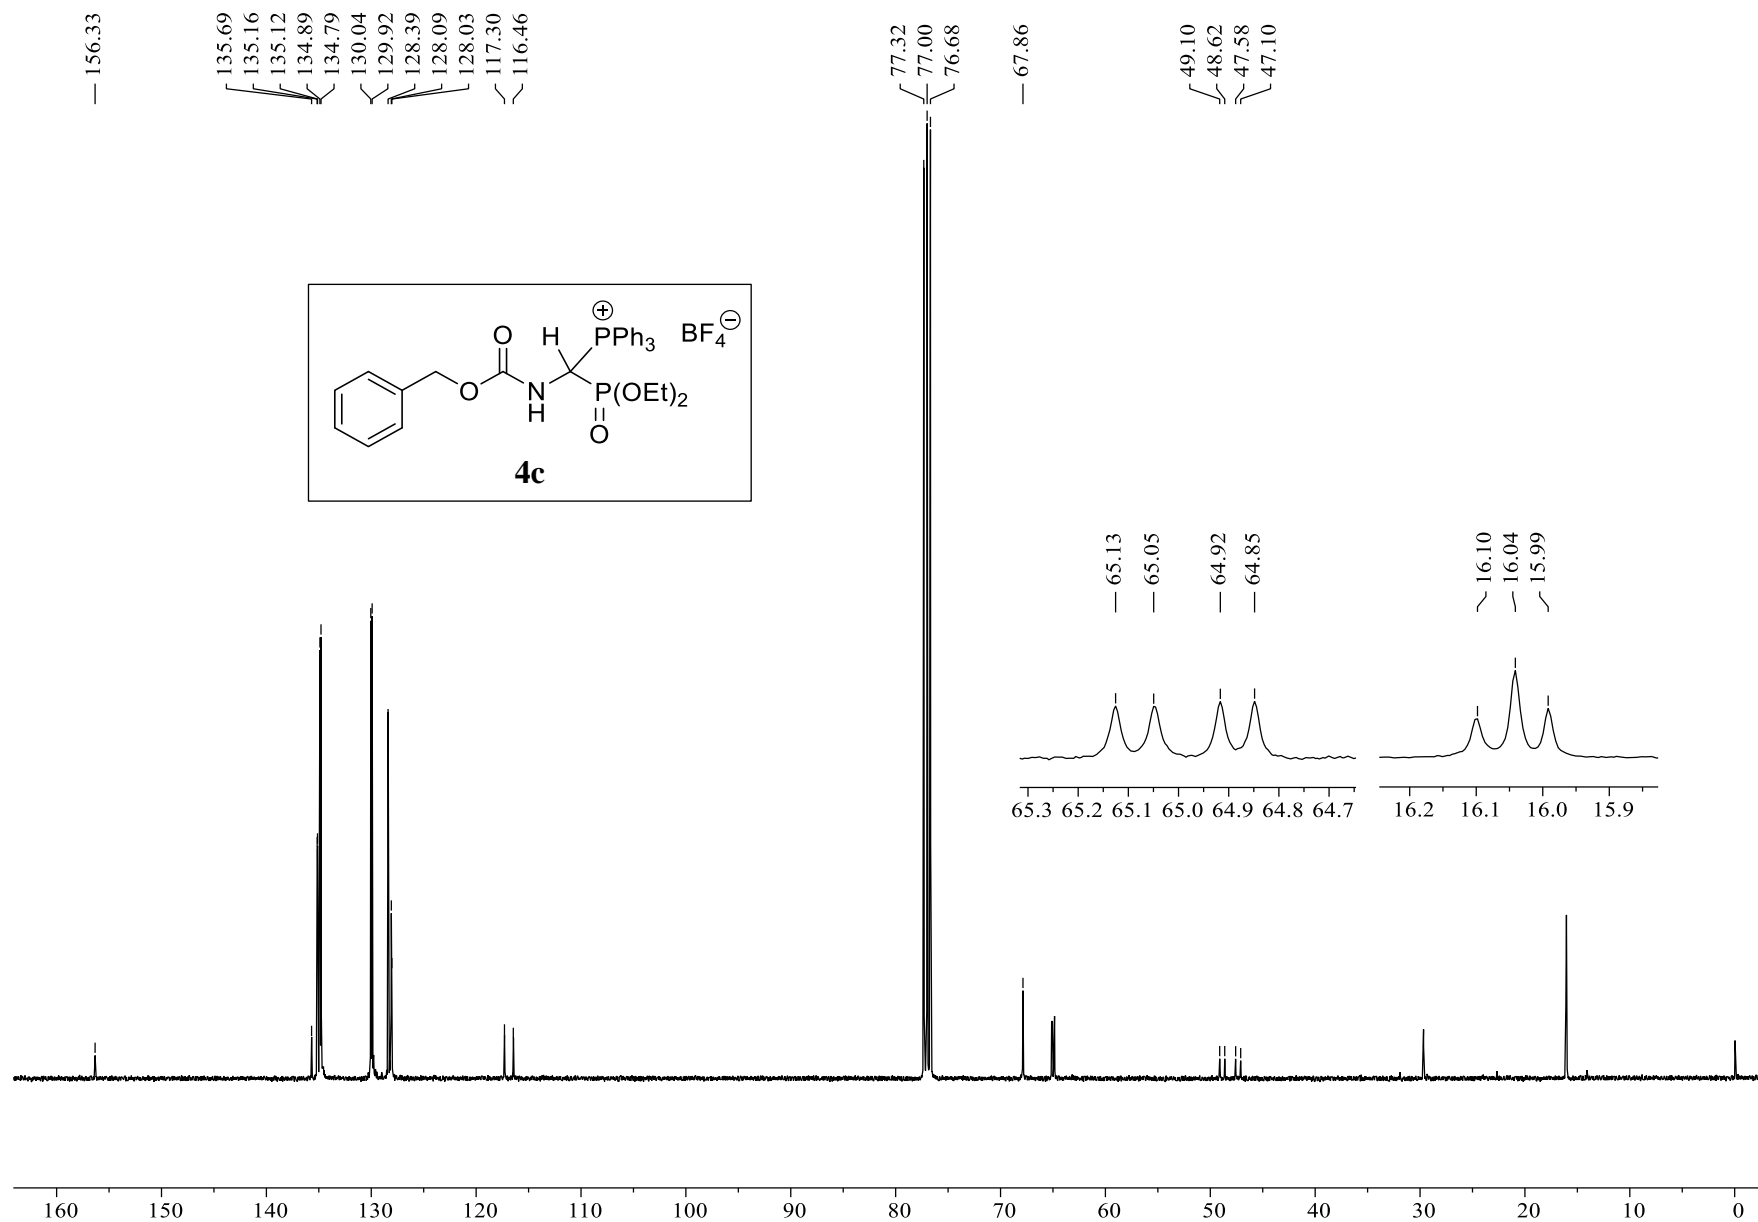

<sup>13</sup>C NMR spectrum of diethyl 1-(N-benzyloxycarbonylamino)-1-triphenylphosphoniummethylphosphonate (**4c**); 400 MHz/CDCl<sub>3</sub>/TMS; δ (ppm).

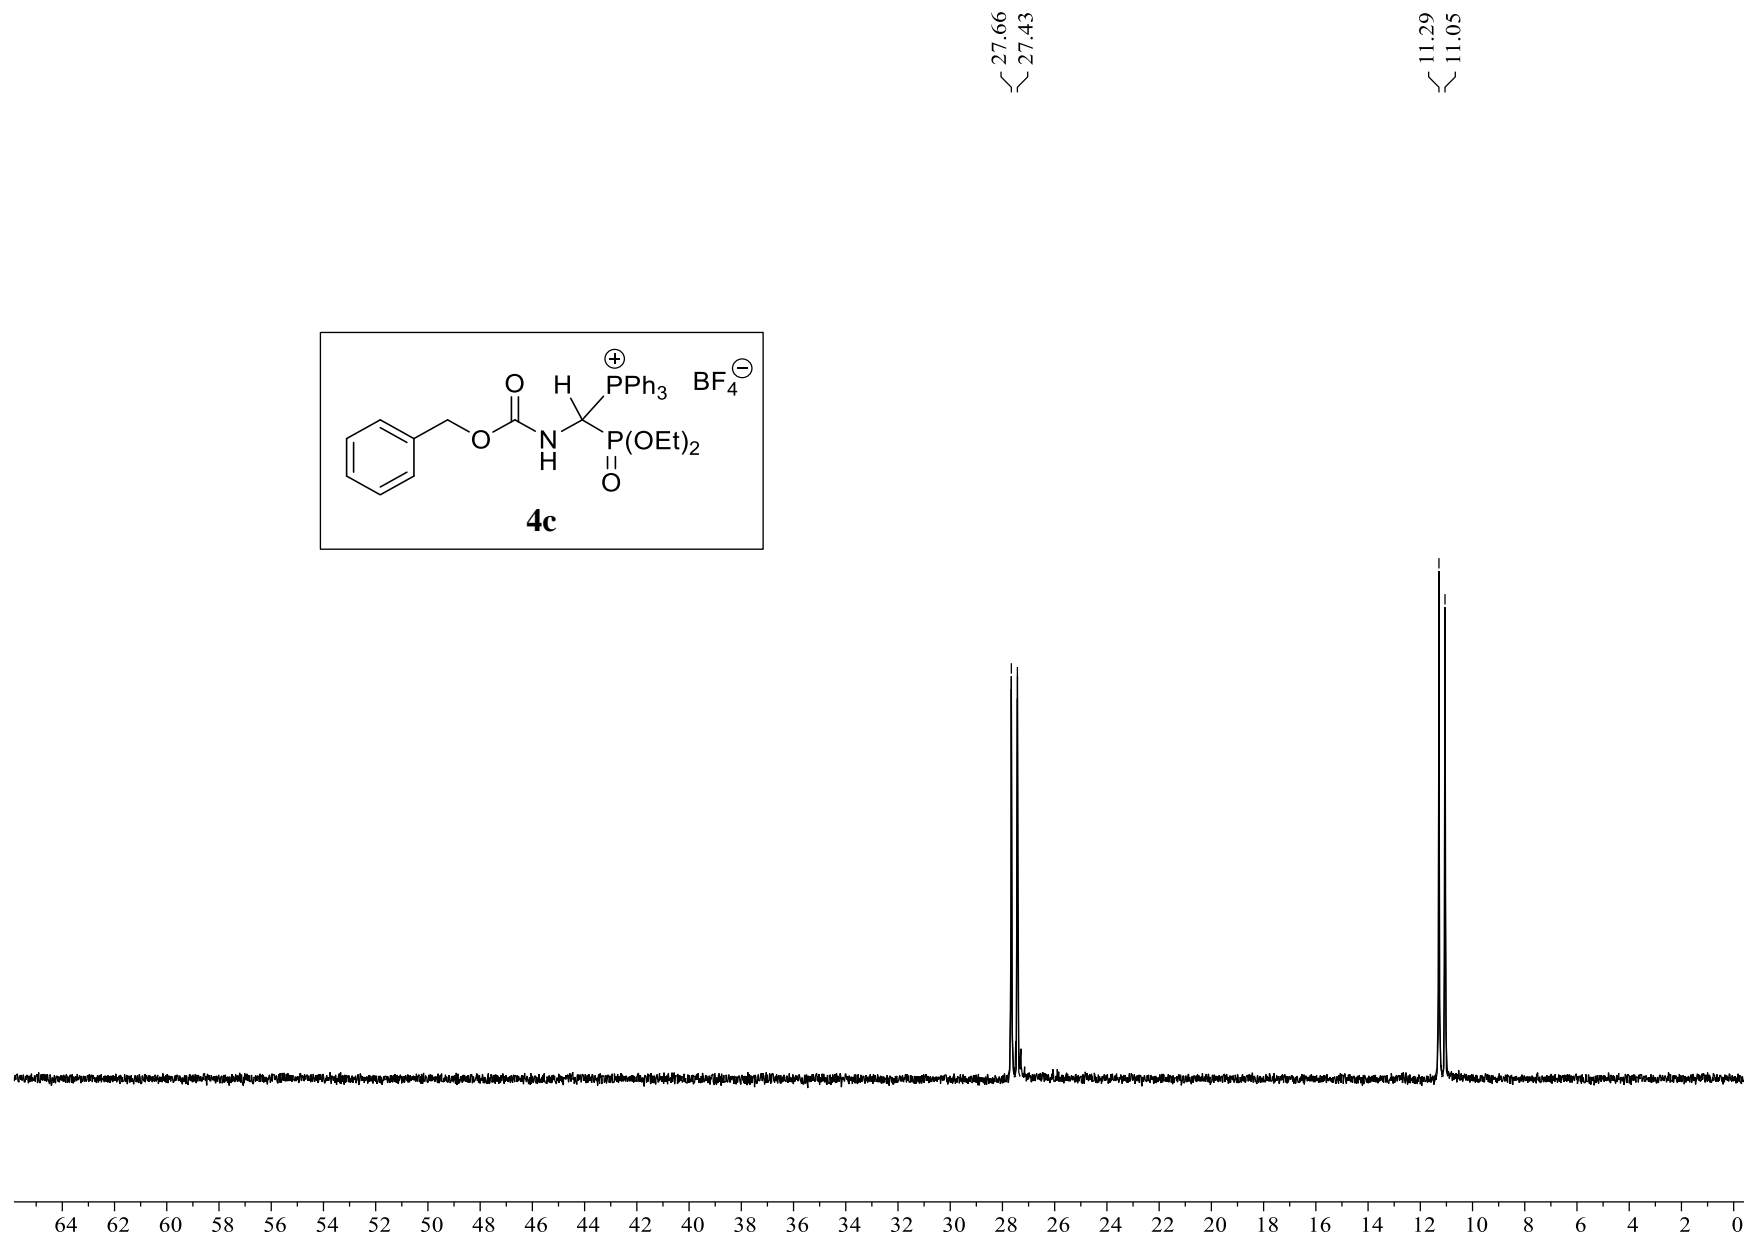

$^{31}\text{P}$  NMR spectrum of diethyl 1-(*N*-benzyloxycarbonylamino)-1-triphenylphosphoniummethylphosphonate (**4c**); 400 MHz/ $\text{CDCl}_3$ /TMS;  $\delta$  (ppm).

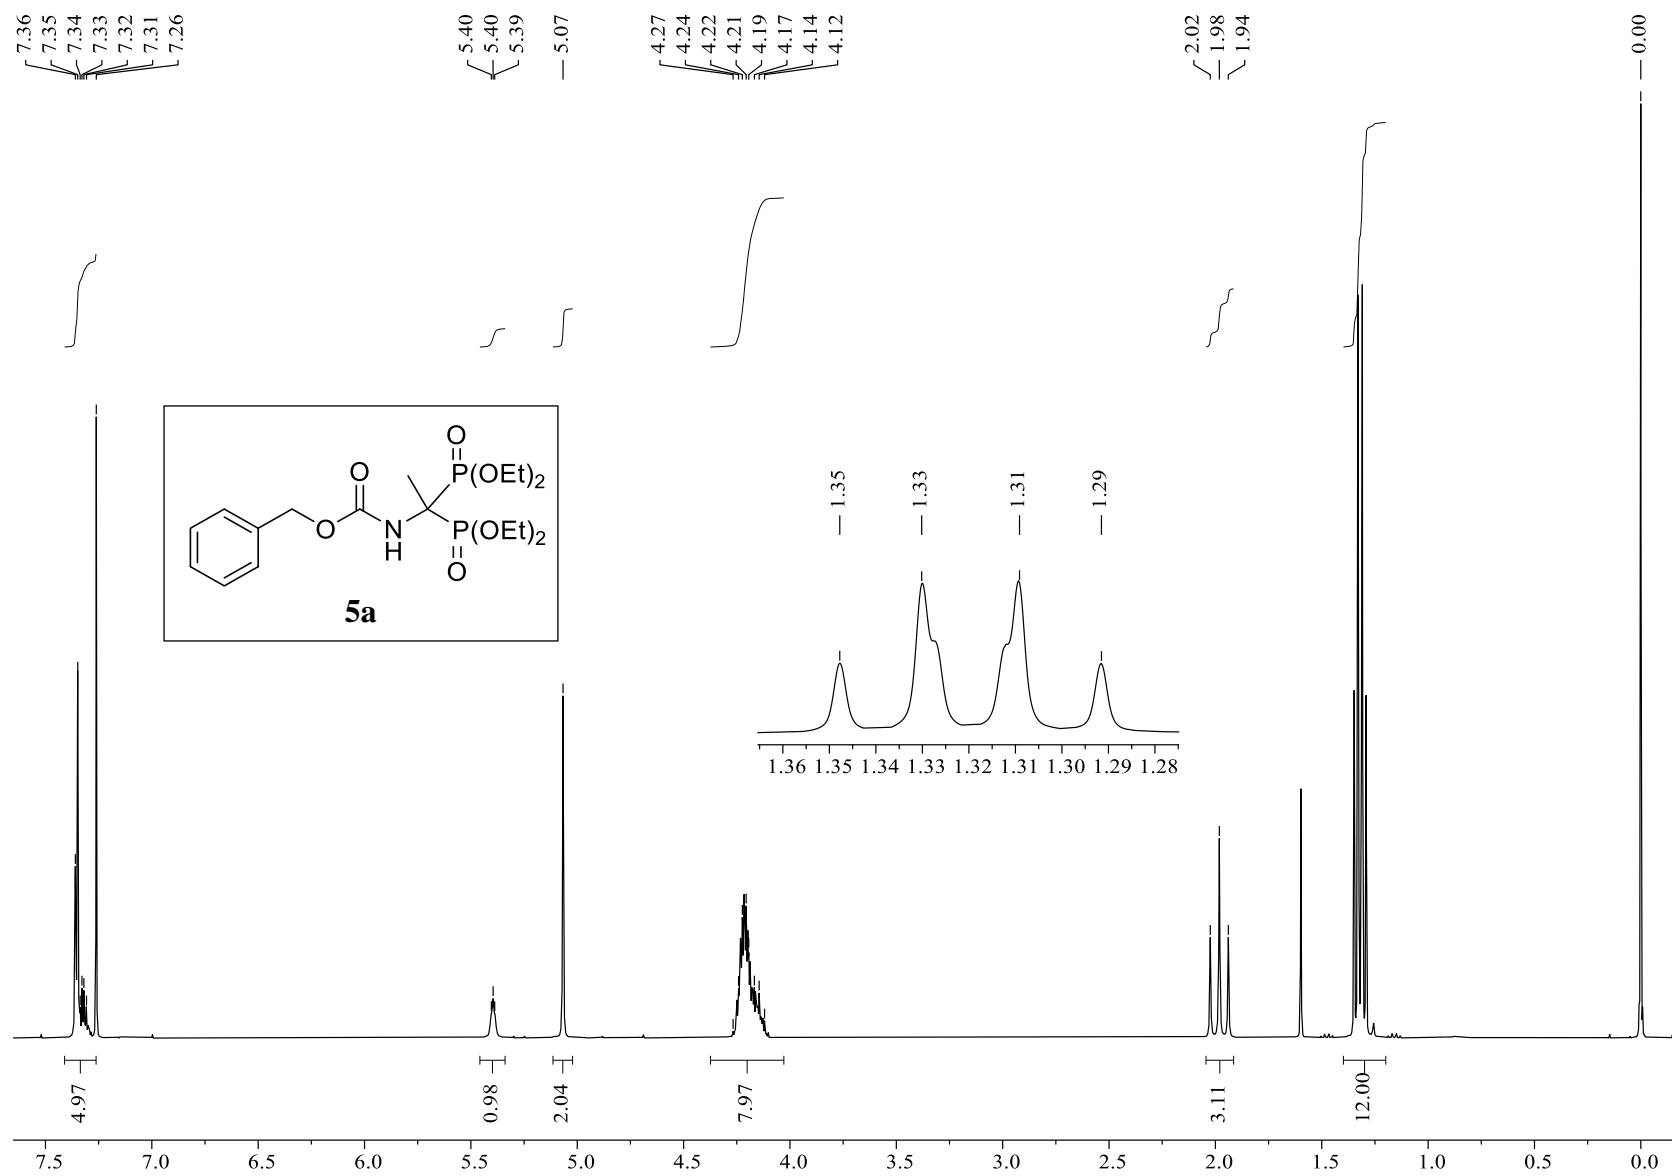

<sup>1</sup>H NMR spectrum of *tetraethyl 1-(N-benzyloxycarbonylamino)ethylene-1,1-bisphosphonate (5a)*; 162 MHz/CDCl<sub>3</sub>/TMS; δ (ppm).

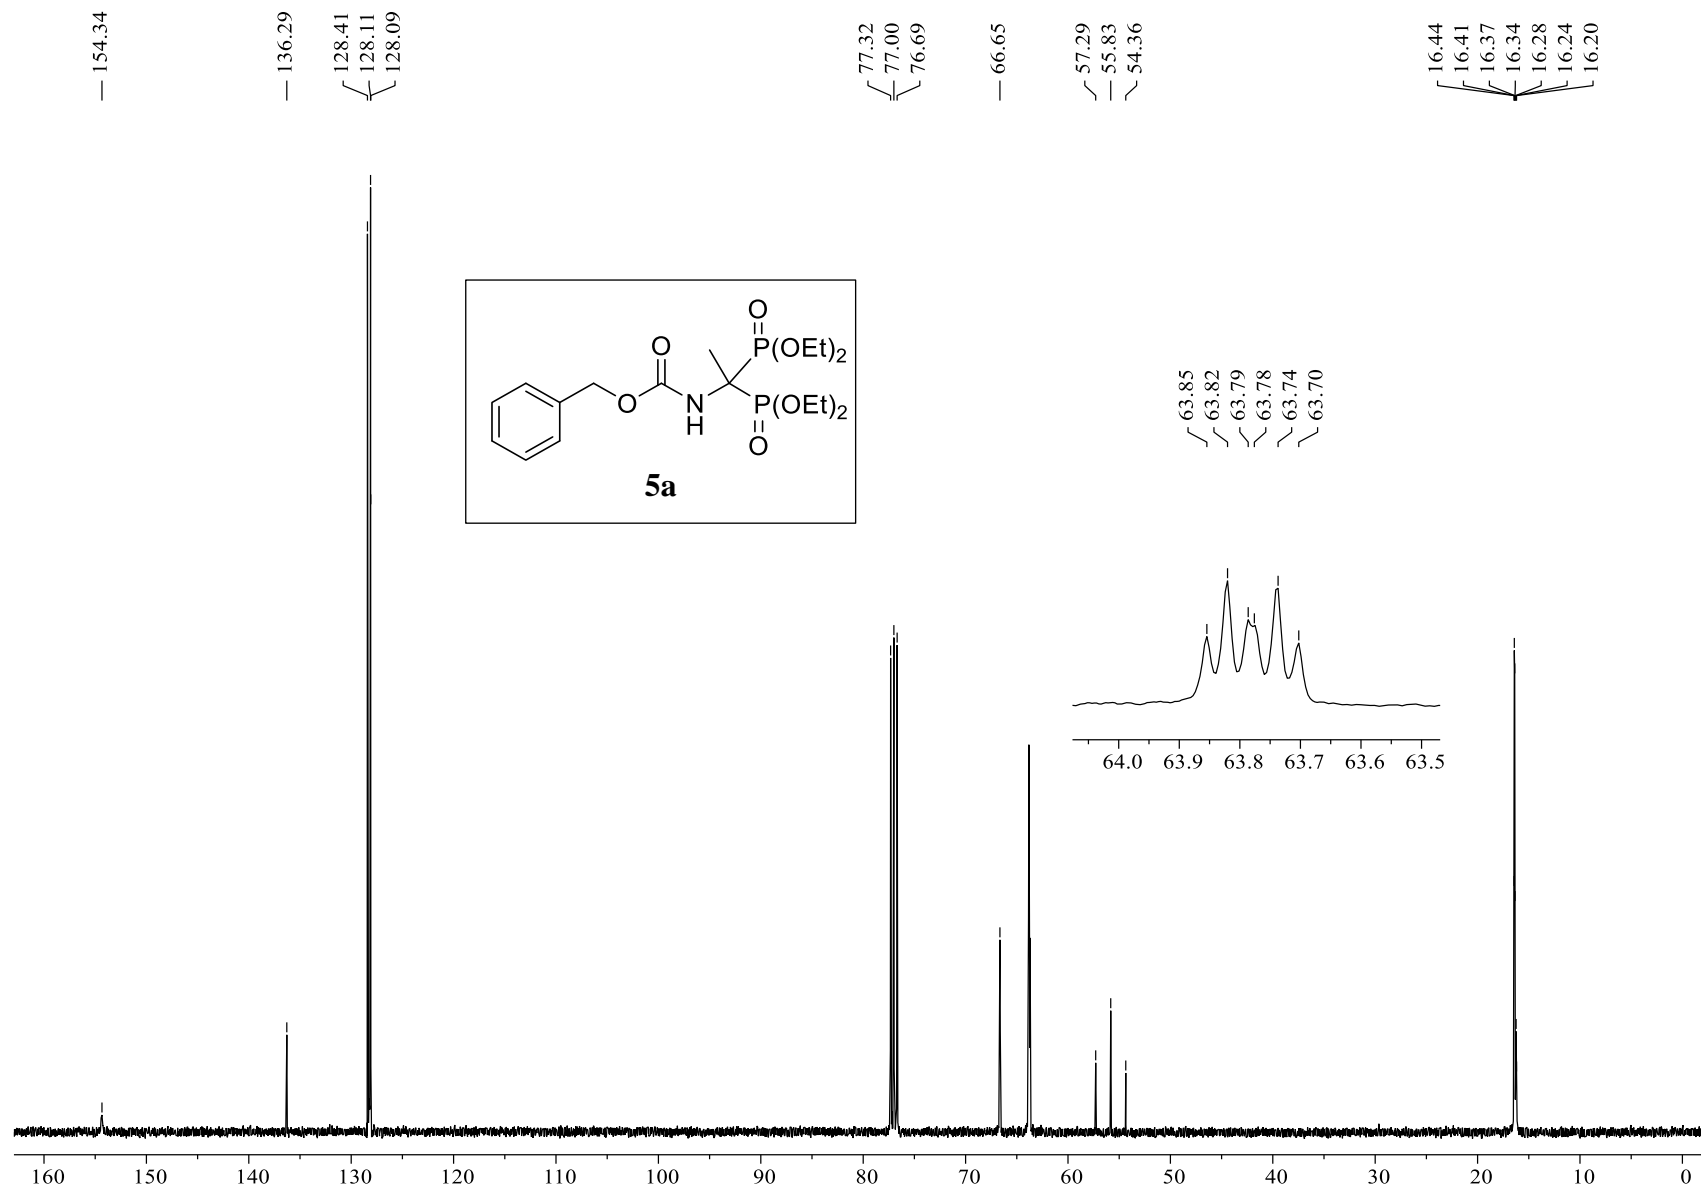

<sup>13</sup>C NMR spectrum of *tetraethyl 1-(N-benzyloxycarbonylamino)ethylene-1,1-bisphosphonate (5a)*; 162 MHz/CDCl<sub>3</sub>/TMS; δ (ppm).

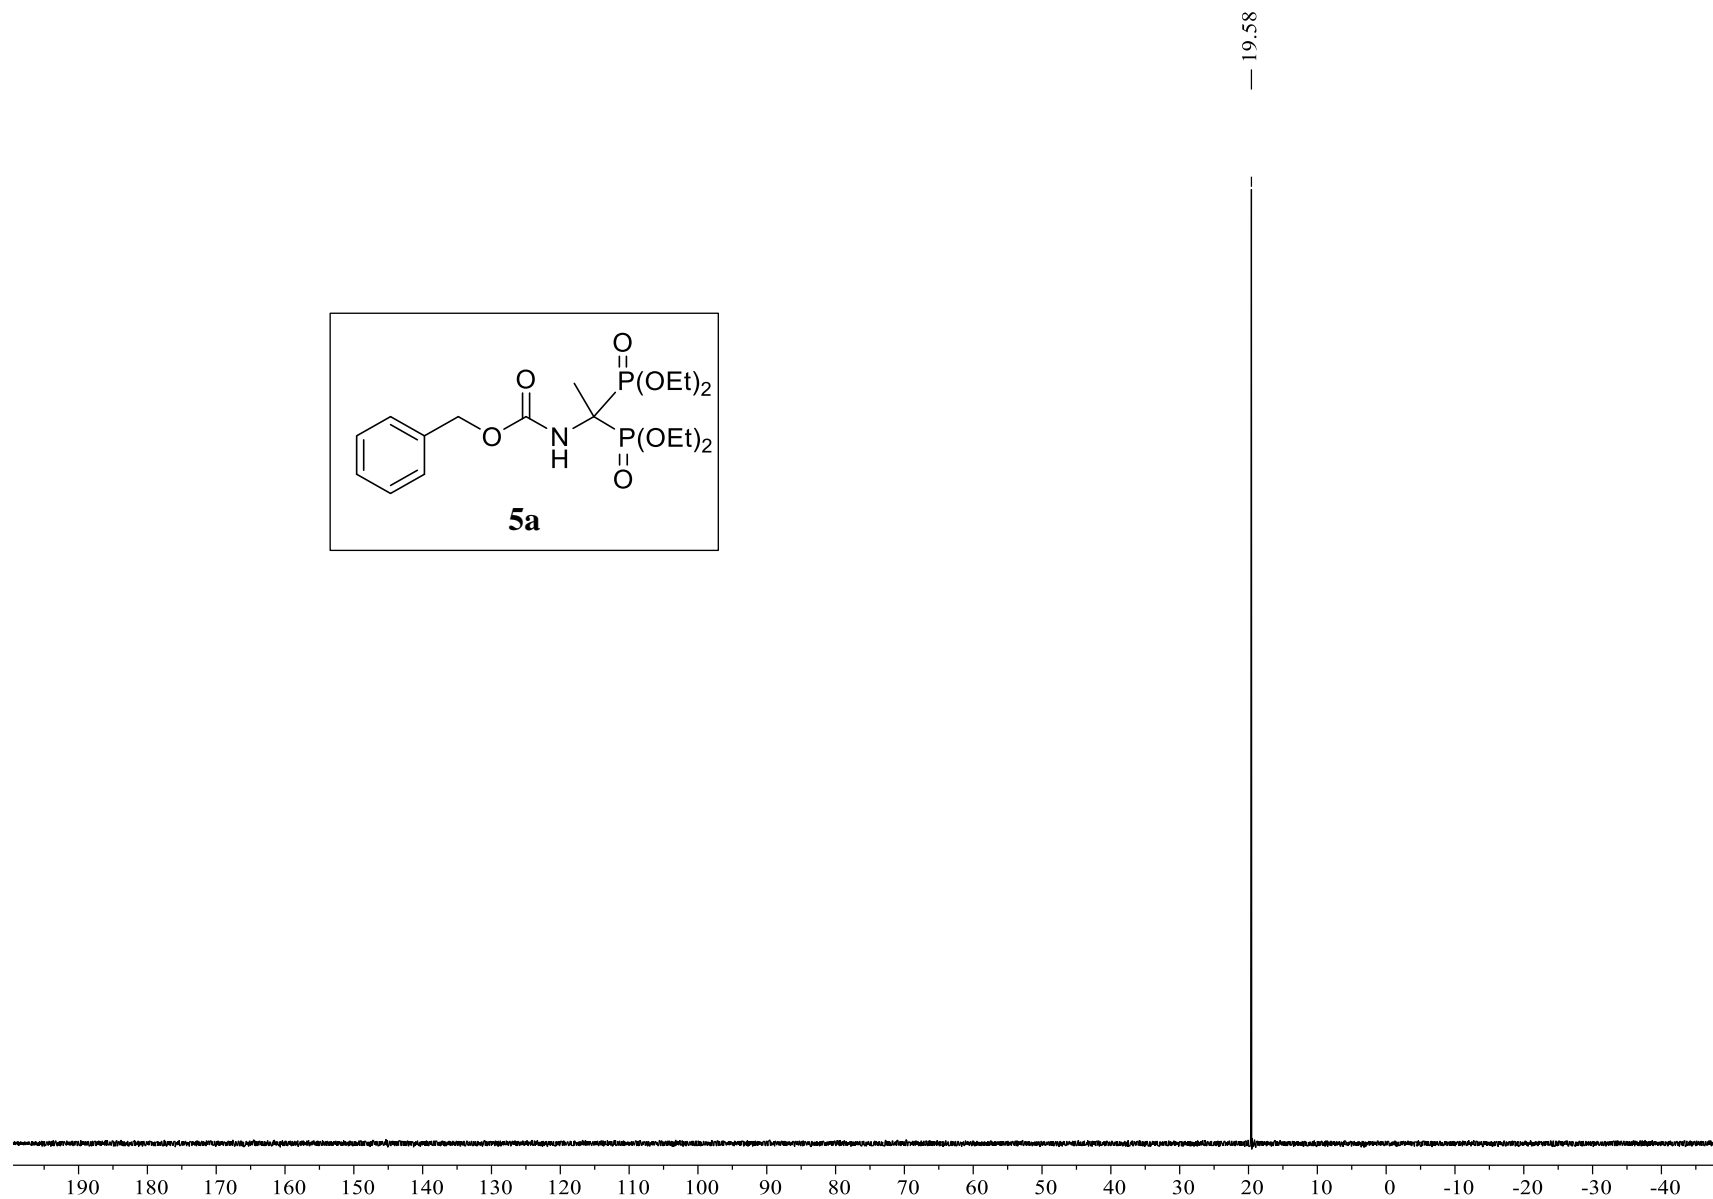

$^{31}\text{P}$  NMR spectrum of *tetraethyl 1-(N-benzyloxycarbonylamino)ethylene-1,1-bisphosphonate (5a)*; 162 MHz/ $\text{CDCl}_3$ /TMS;  $\delta$  (ppm).

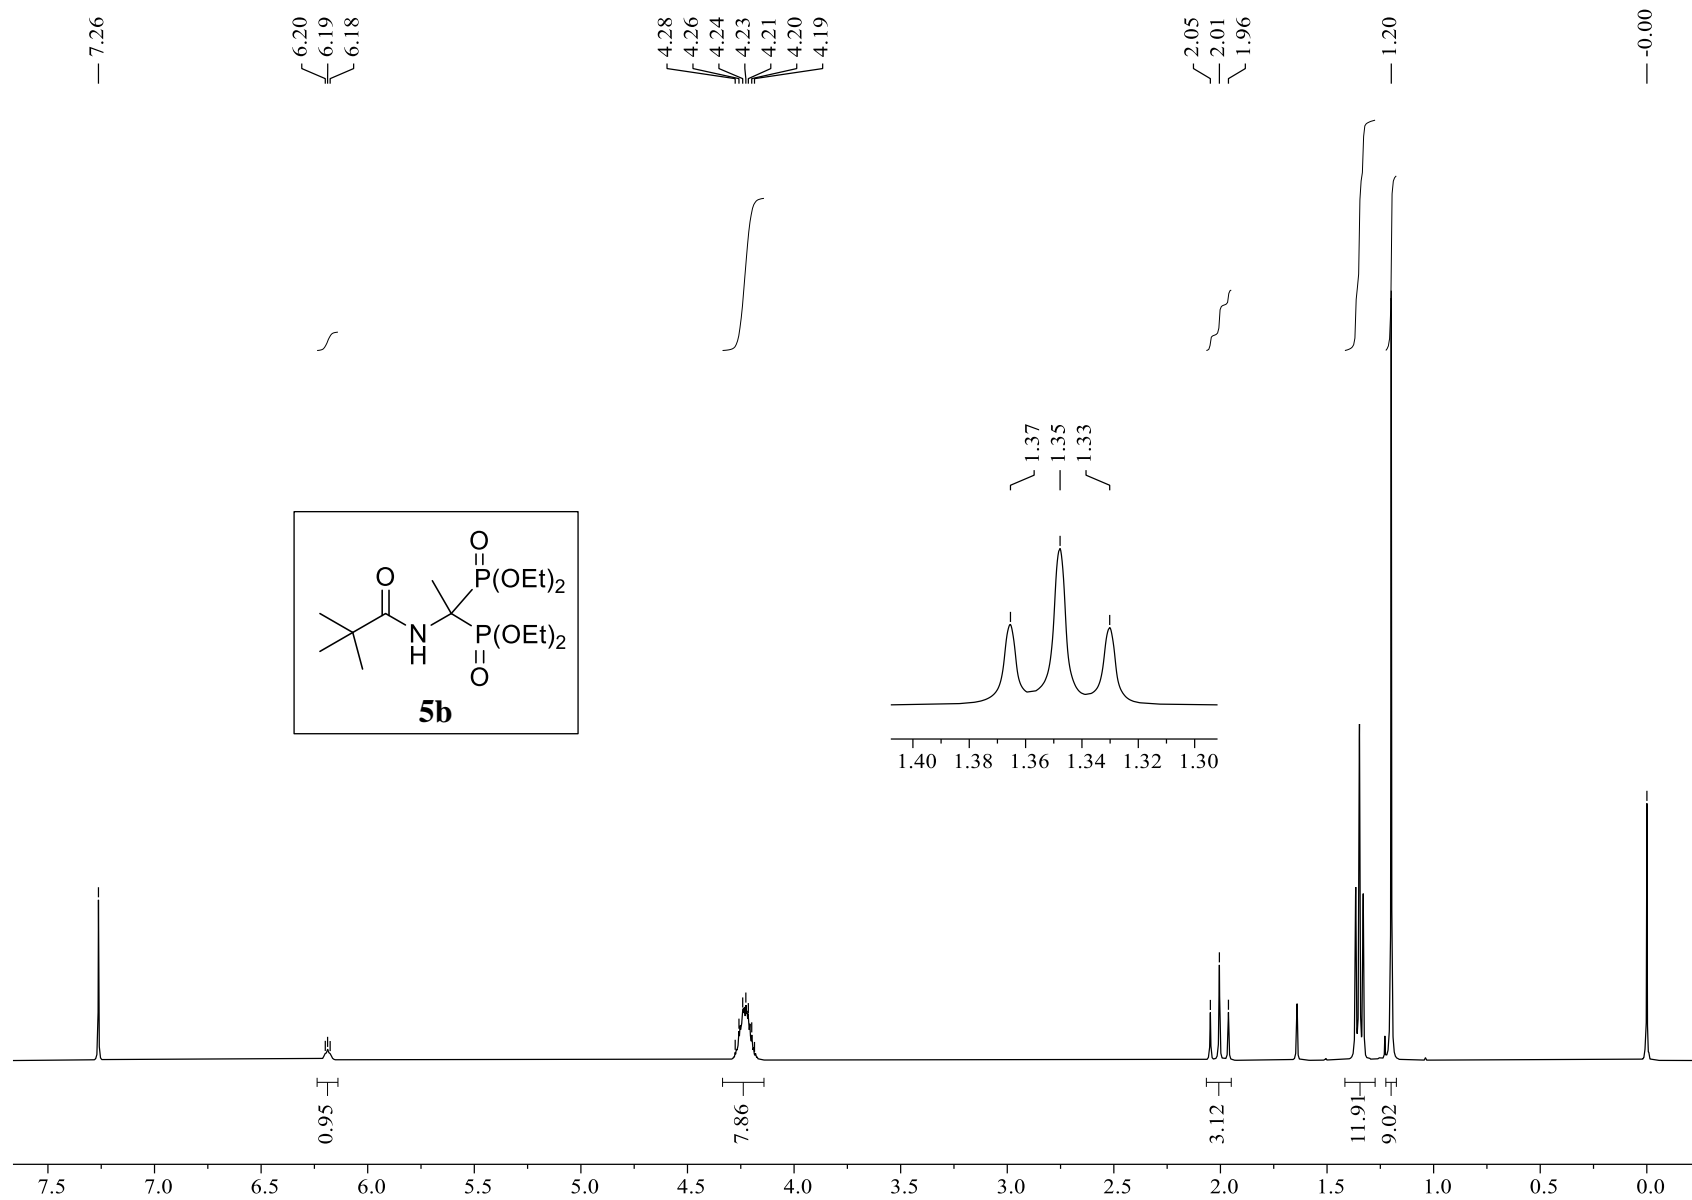

<sup>1</sup>H NMR spectrum of *tetraethyl 1-(N-pivaloylamino)ethylene-1,1-bisphosphonate (5b)*; 400 MHz/CDCl<sub>3</sub>/TMS; δ (ppm).

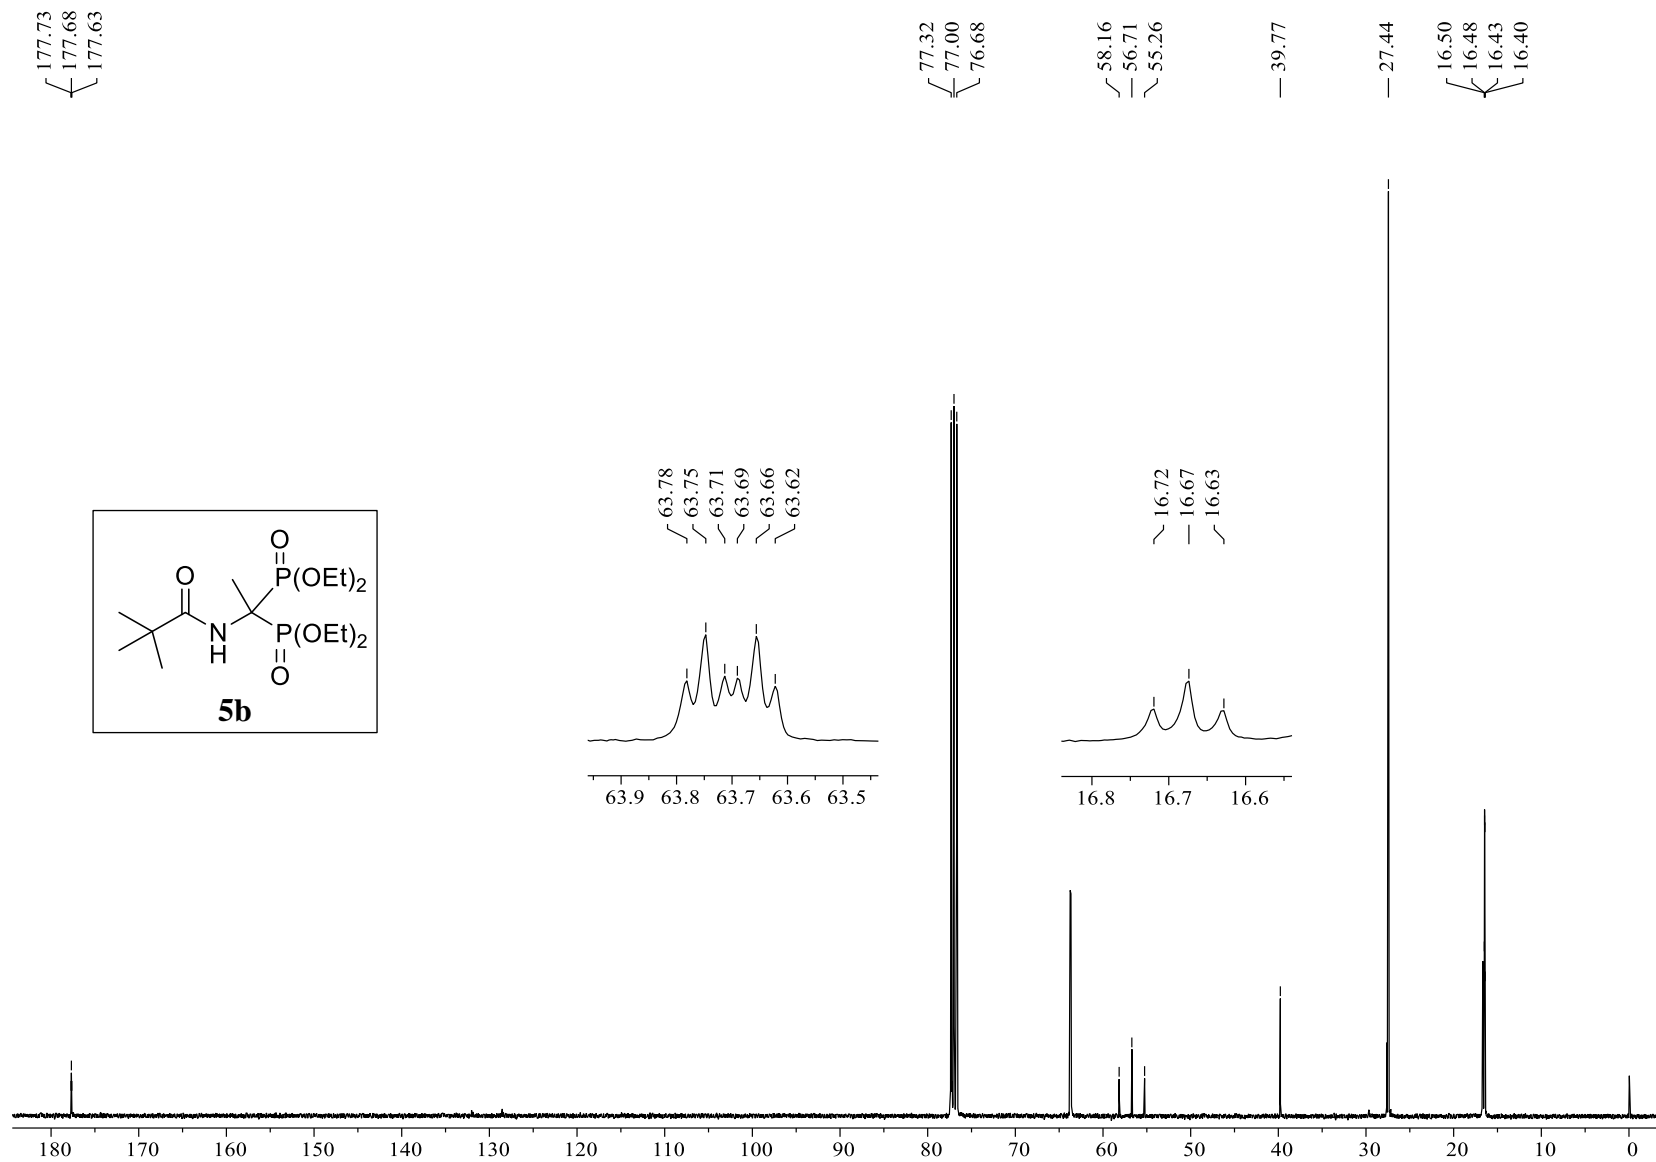

<sup>13</sup>C NMR spectrum of *tetraethyl 1-(N-pivaloylamino)ethylene-1,1-bisphosphonate (5b)*; 100 MHz/CDCl<sub>3</sub>/TMS;  $\delta$  (ppm).

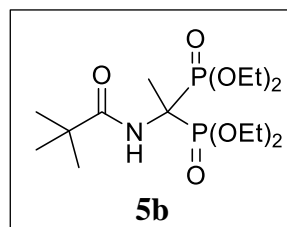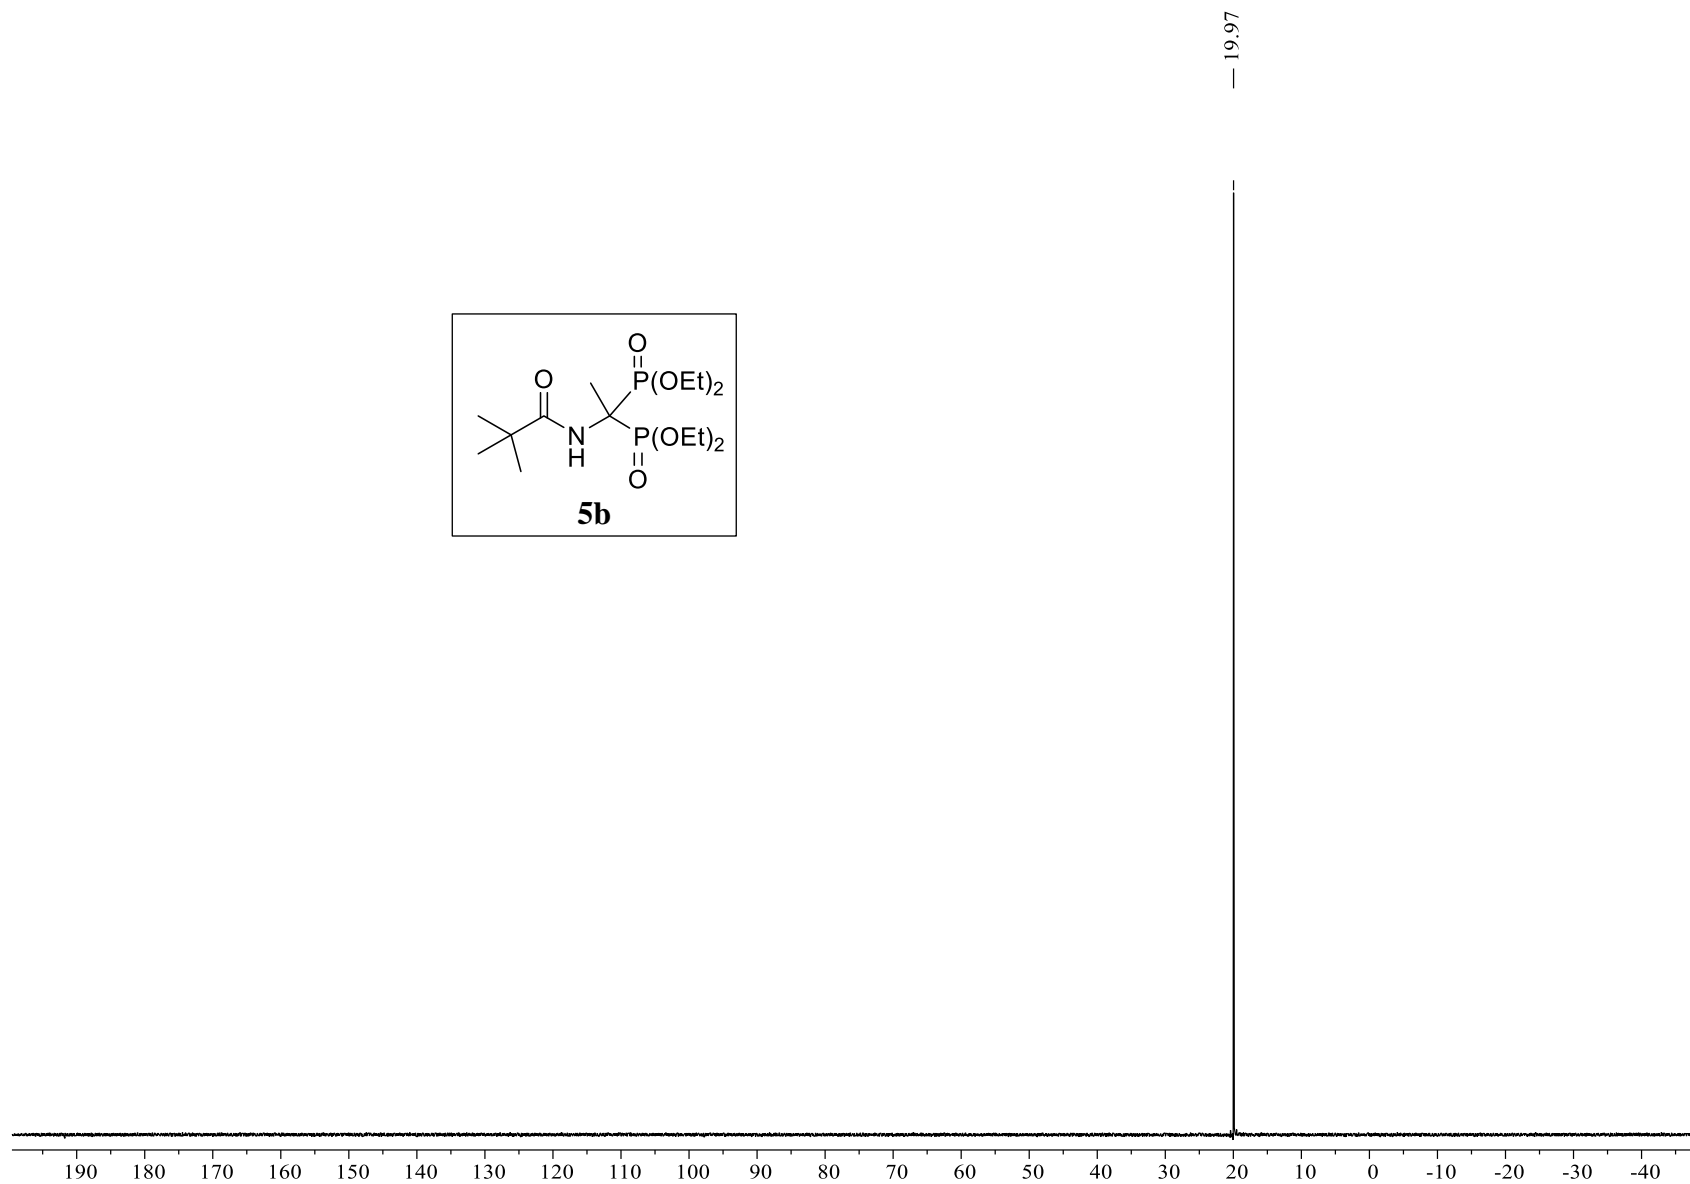

$^{31}\text{P}$  NMR spectrum of *tetraethyl 1-(N-pivaloylamino)ethylene-1,1-bisphosphonate (5b)*; 162 MHz/ $\text{CDCl}_3/\text{TMS}$ ;  $\delta$  (ppm).



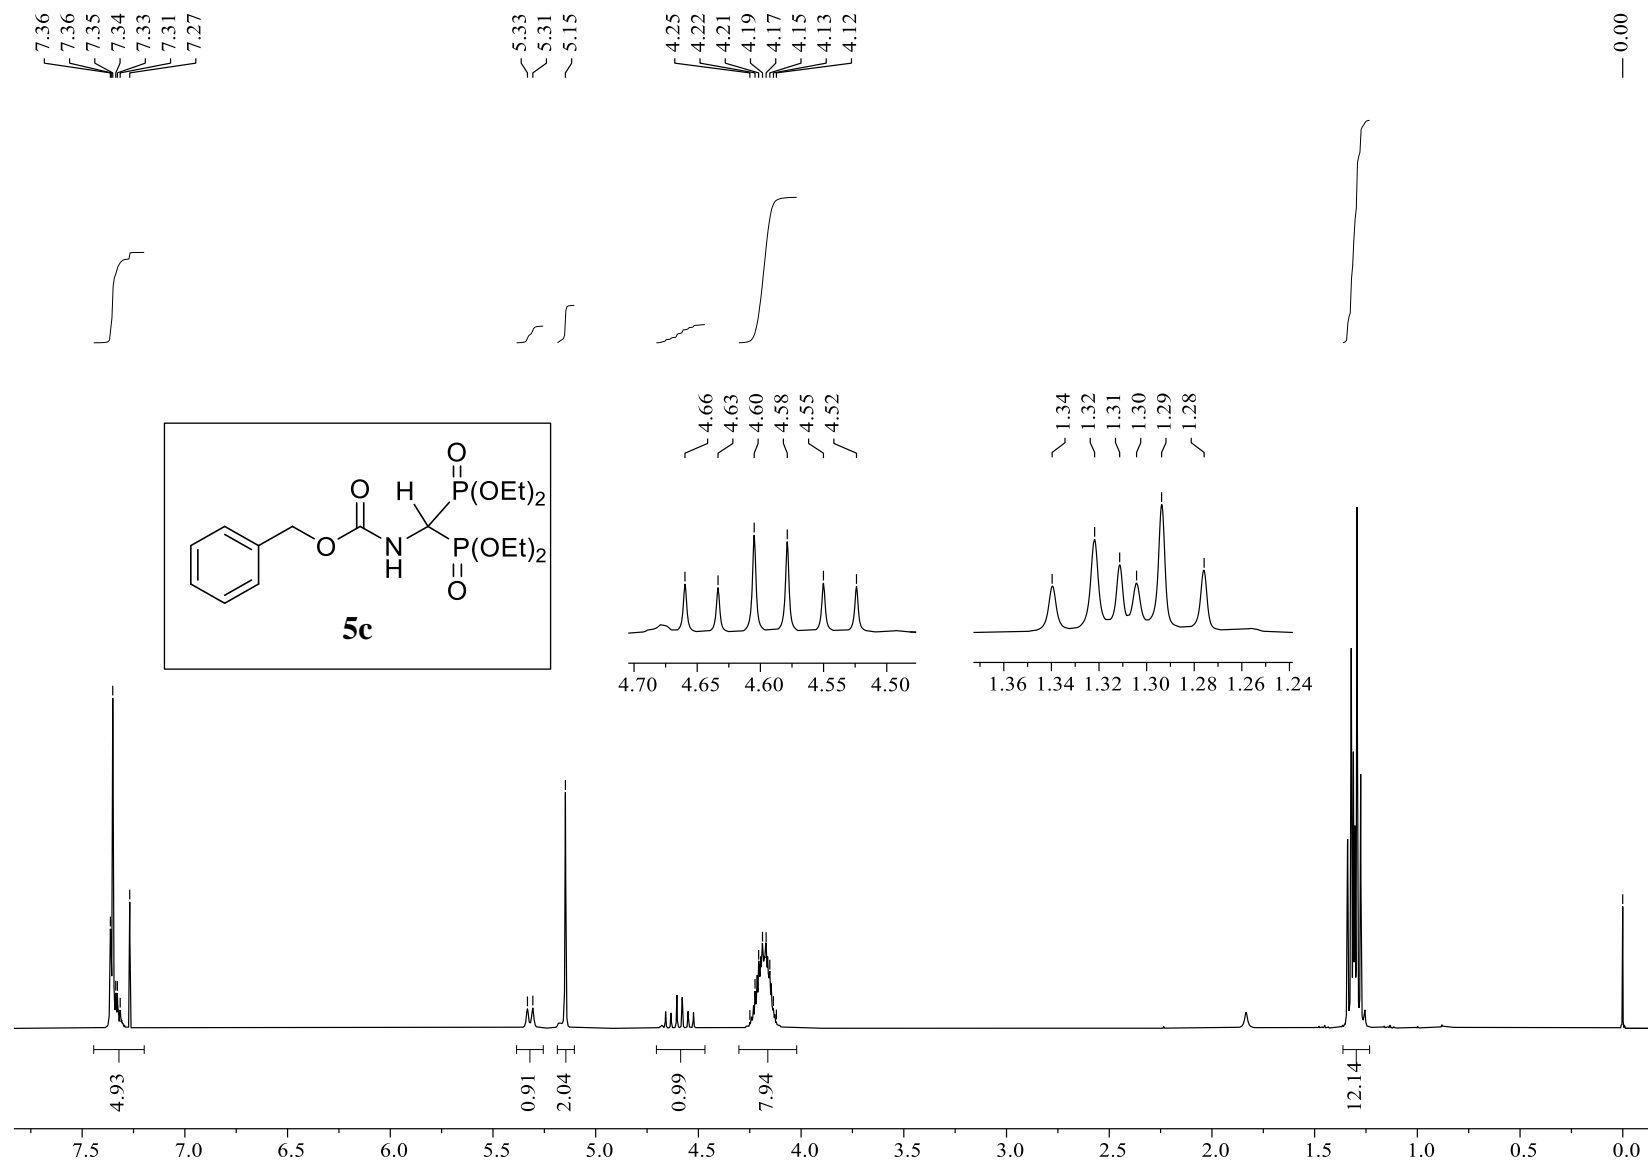

<sup>1</sup>H NMR spectrum of *tetraethyl 1-(N-benzyloxycarbonylamino)methylene-1,1-bisphosphonate (5c)*; 400 MHz/CDCl<sub>3</sub>/TMS; δ (ppm).

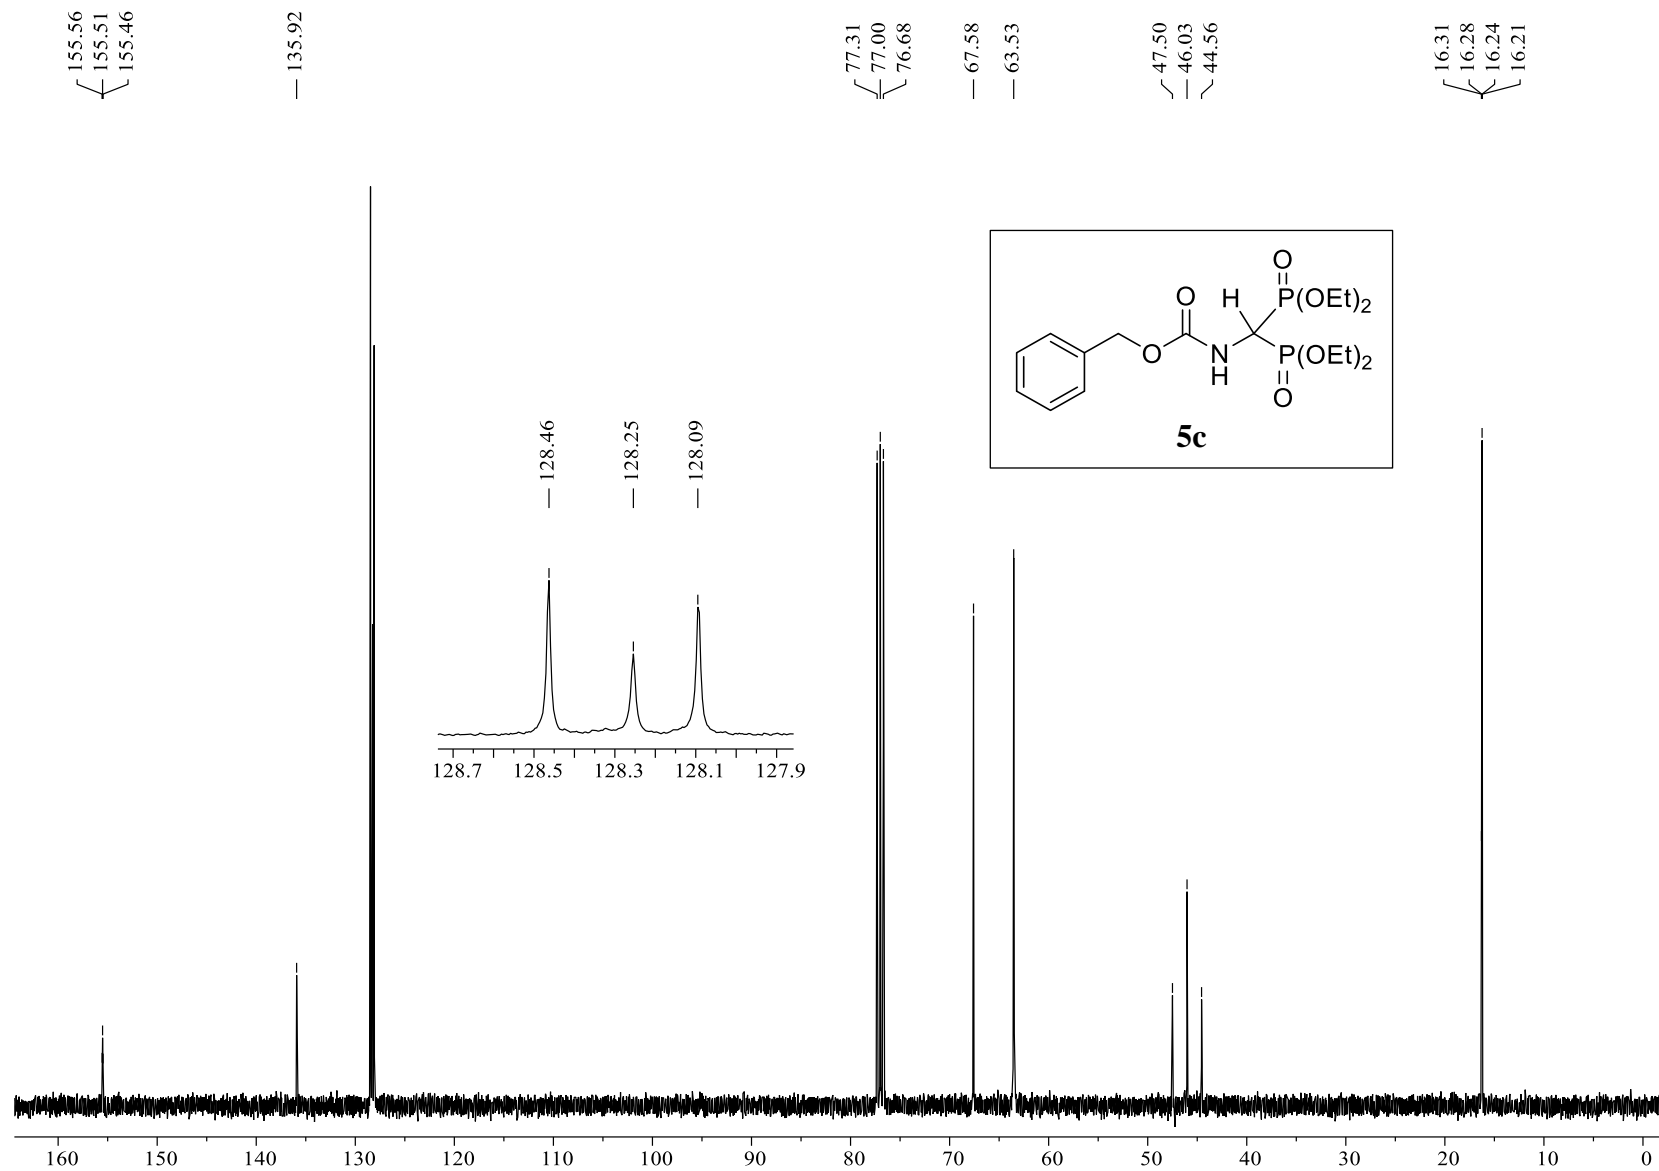

<sup>13</sup>C NMR spectrum of *tetraethyl 1-(N-benzoyloxycarbonylamino)methylene-1,1-bisphosphonate* (**5c**); 100 MHz/<sup>13</sup>CDCl<sub>3</sub>/TMS; δ (ppm).

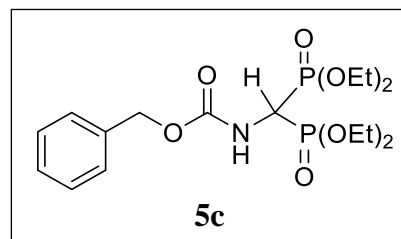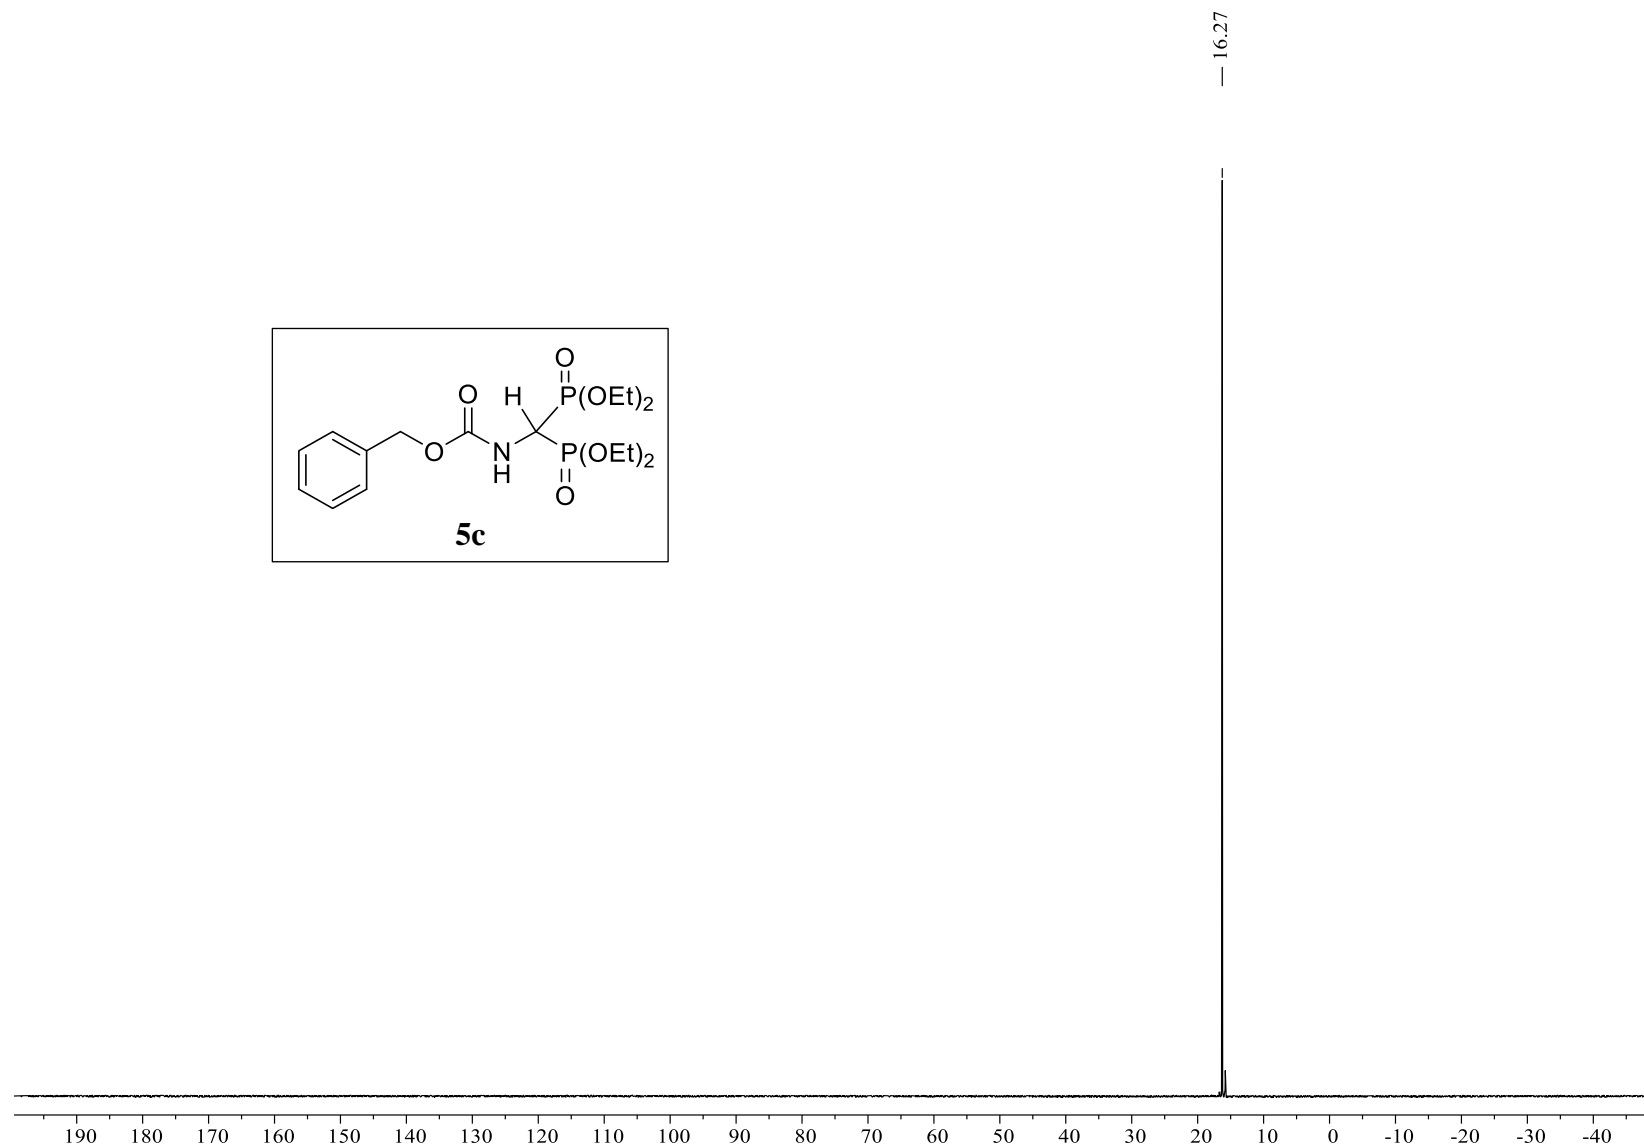

$^{31}\text{P}$  NMR spectrum of *tetraethyl 1-(N-benzyloxycarbonylamino)methylene-1,1-bisphosphonate (5c)*; 162 MHz/ $\text{CDCl}_3/\text{TMS}$ ;  $\delta$  (ppm).

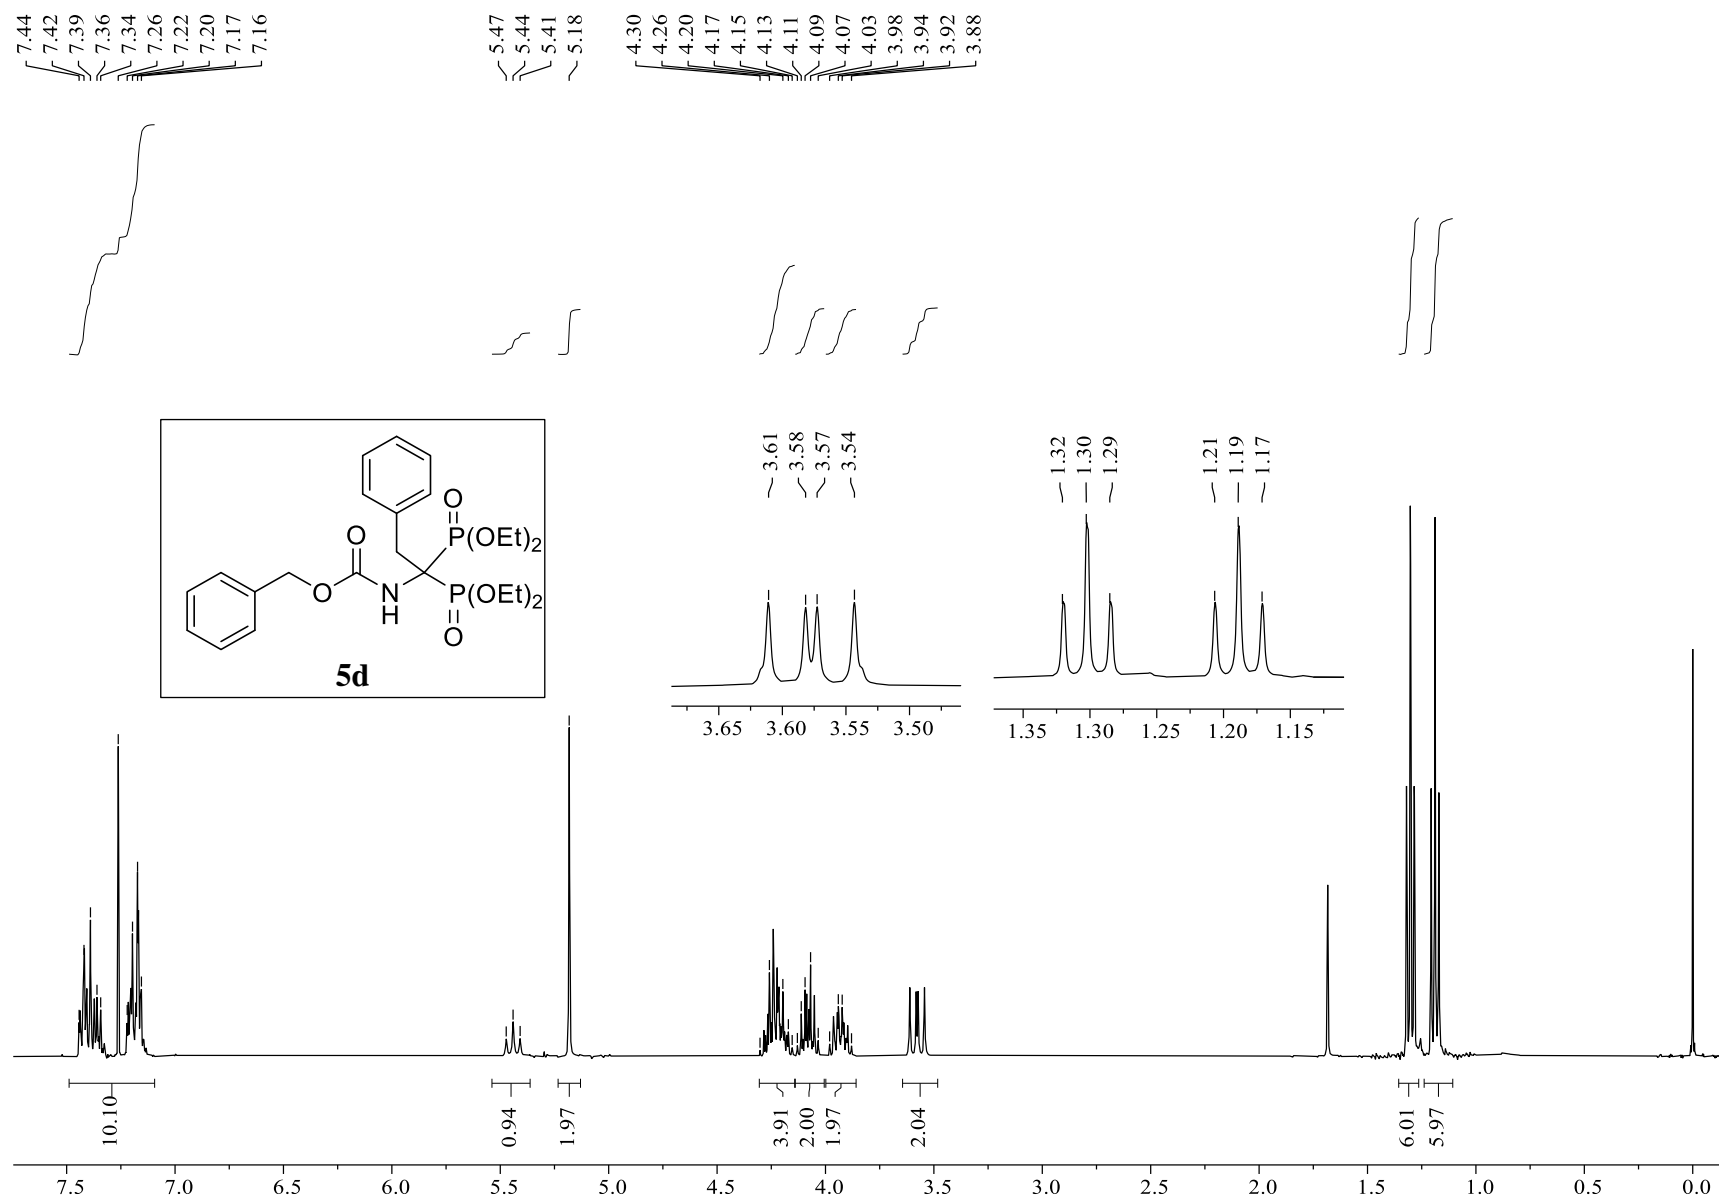

<sup>1</sup>H NMR spectrum of *tetraethyl 1-(N-benzoyloxycarbonylamino)-2-phenylethylene-1,1-bisphosphonate* (**5d**); 400 MHz/CDCl<sub>3</sub>/TMS; δ (ppm).

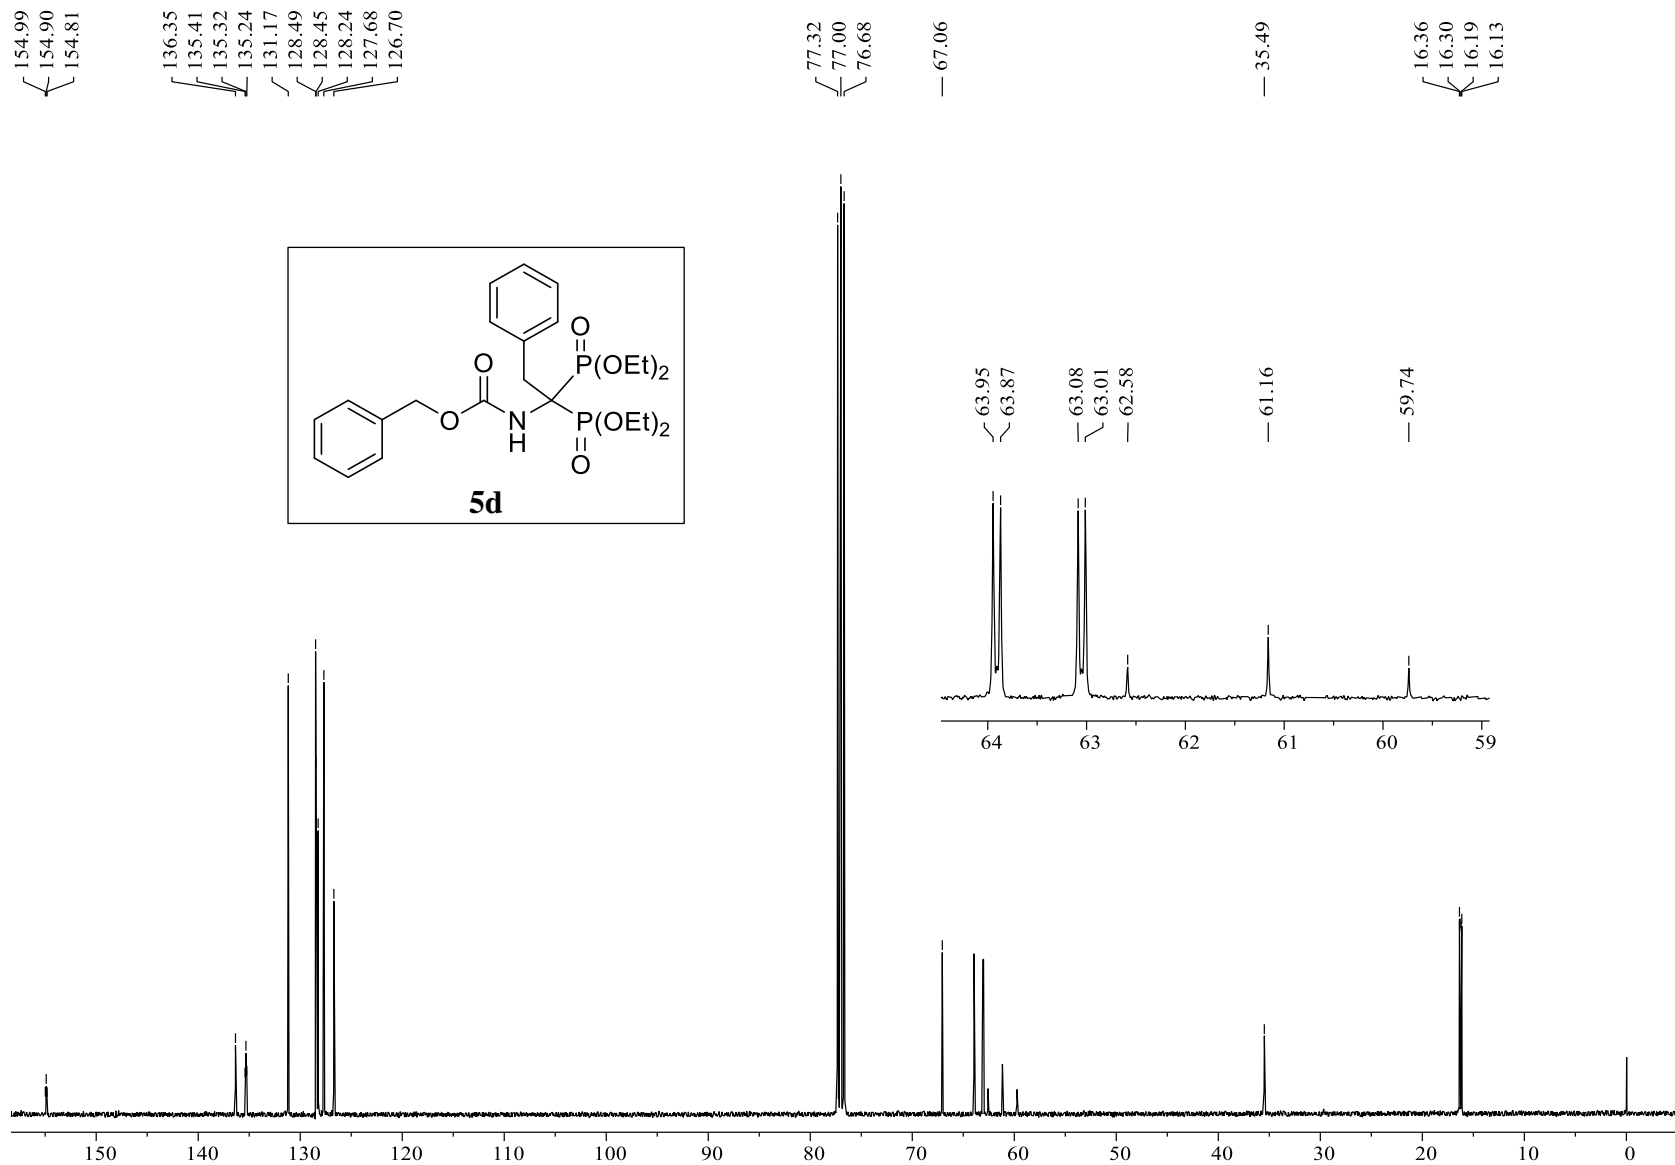

<sup>13</sup>C NMR spectrum of *tetraethyl 1-(N-benzyloxycarbonylamino)-2-phenylethylene-1,1-bisphosphonate (5d)*; 100 MHz/CDCl<sub>3</sub>/TMS; δ (ppm).

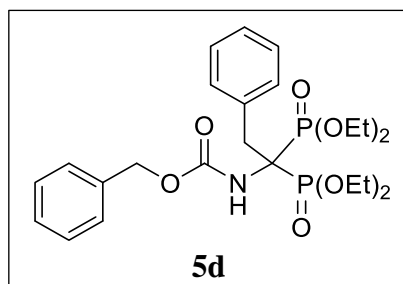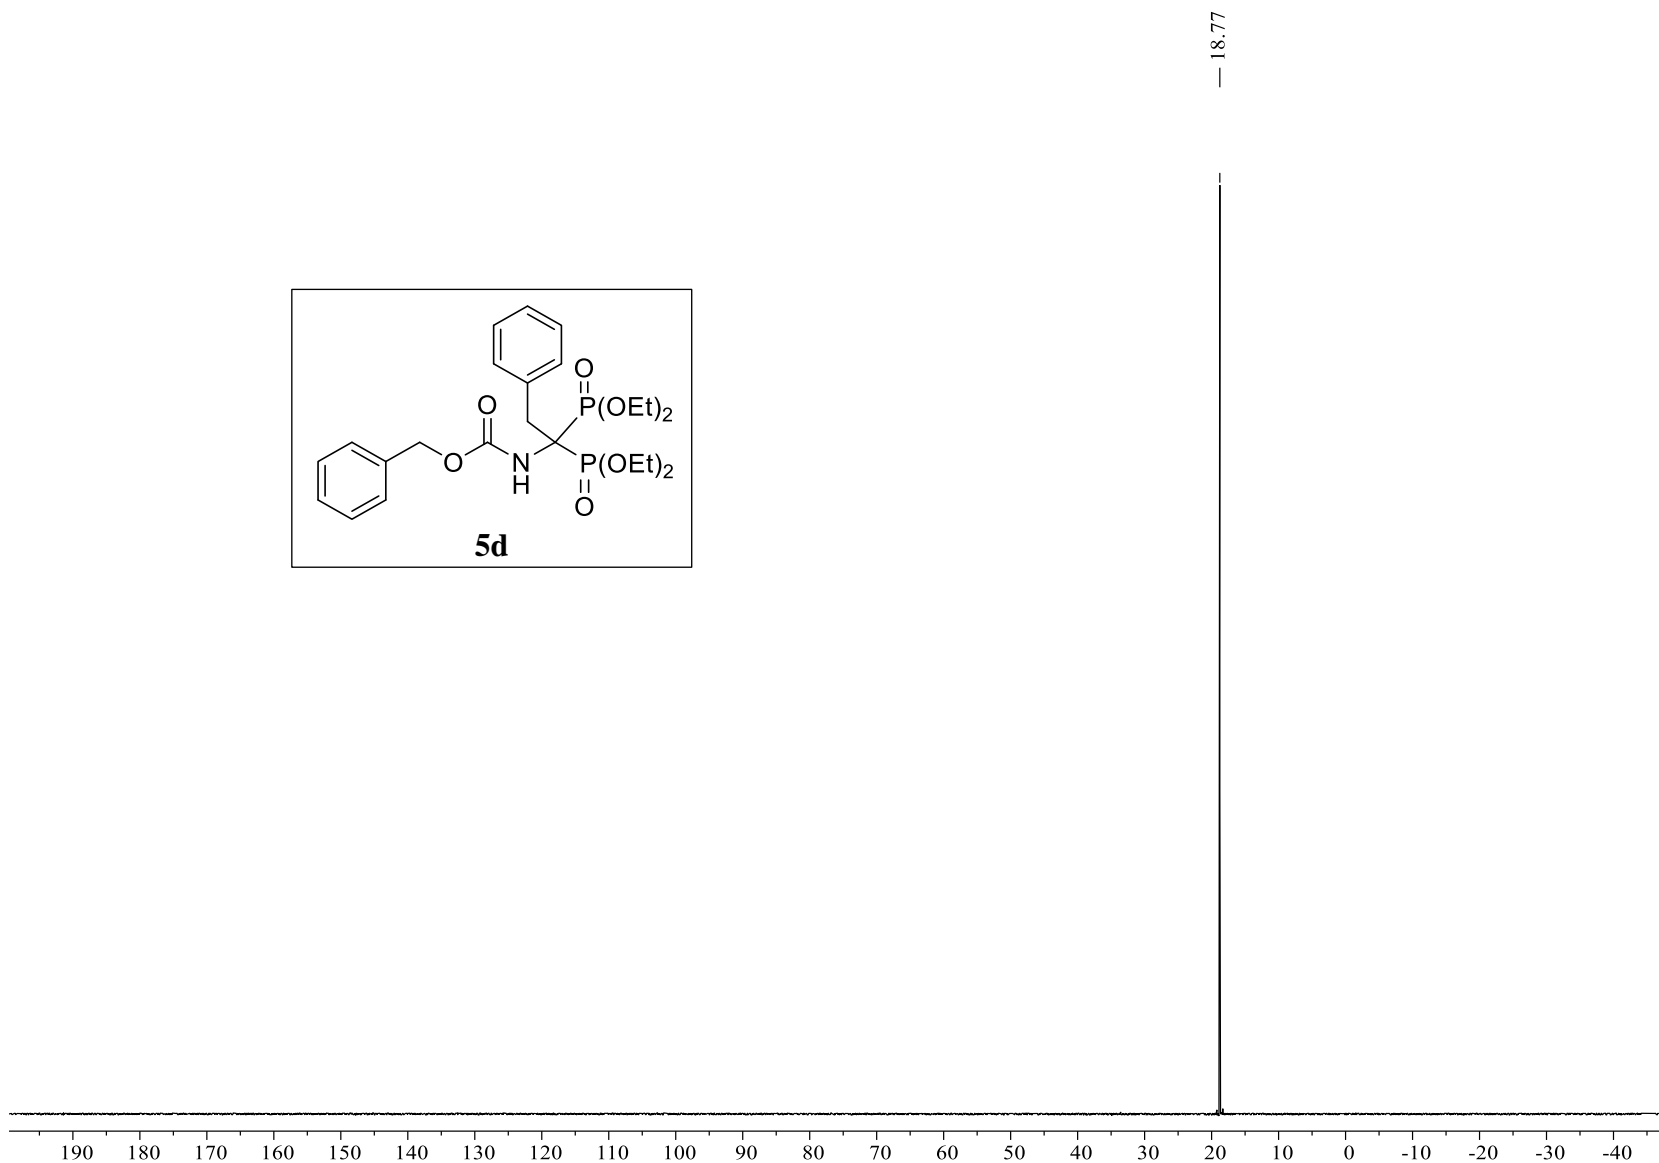

$^{31}\text{P}$  NMR spectrum of *tetraethyl 1-(N-benzyloxycarbonylamino)-2-phenylethylene-1,1-bisphosphonate (5d)*; 162 MHz/ $\text{CDCl}_3$ /TMS;  $\delta$  (ppm).

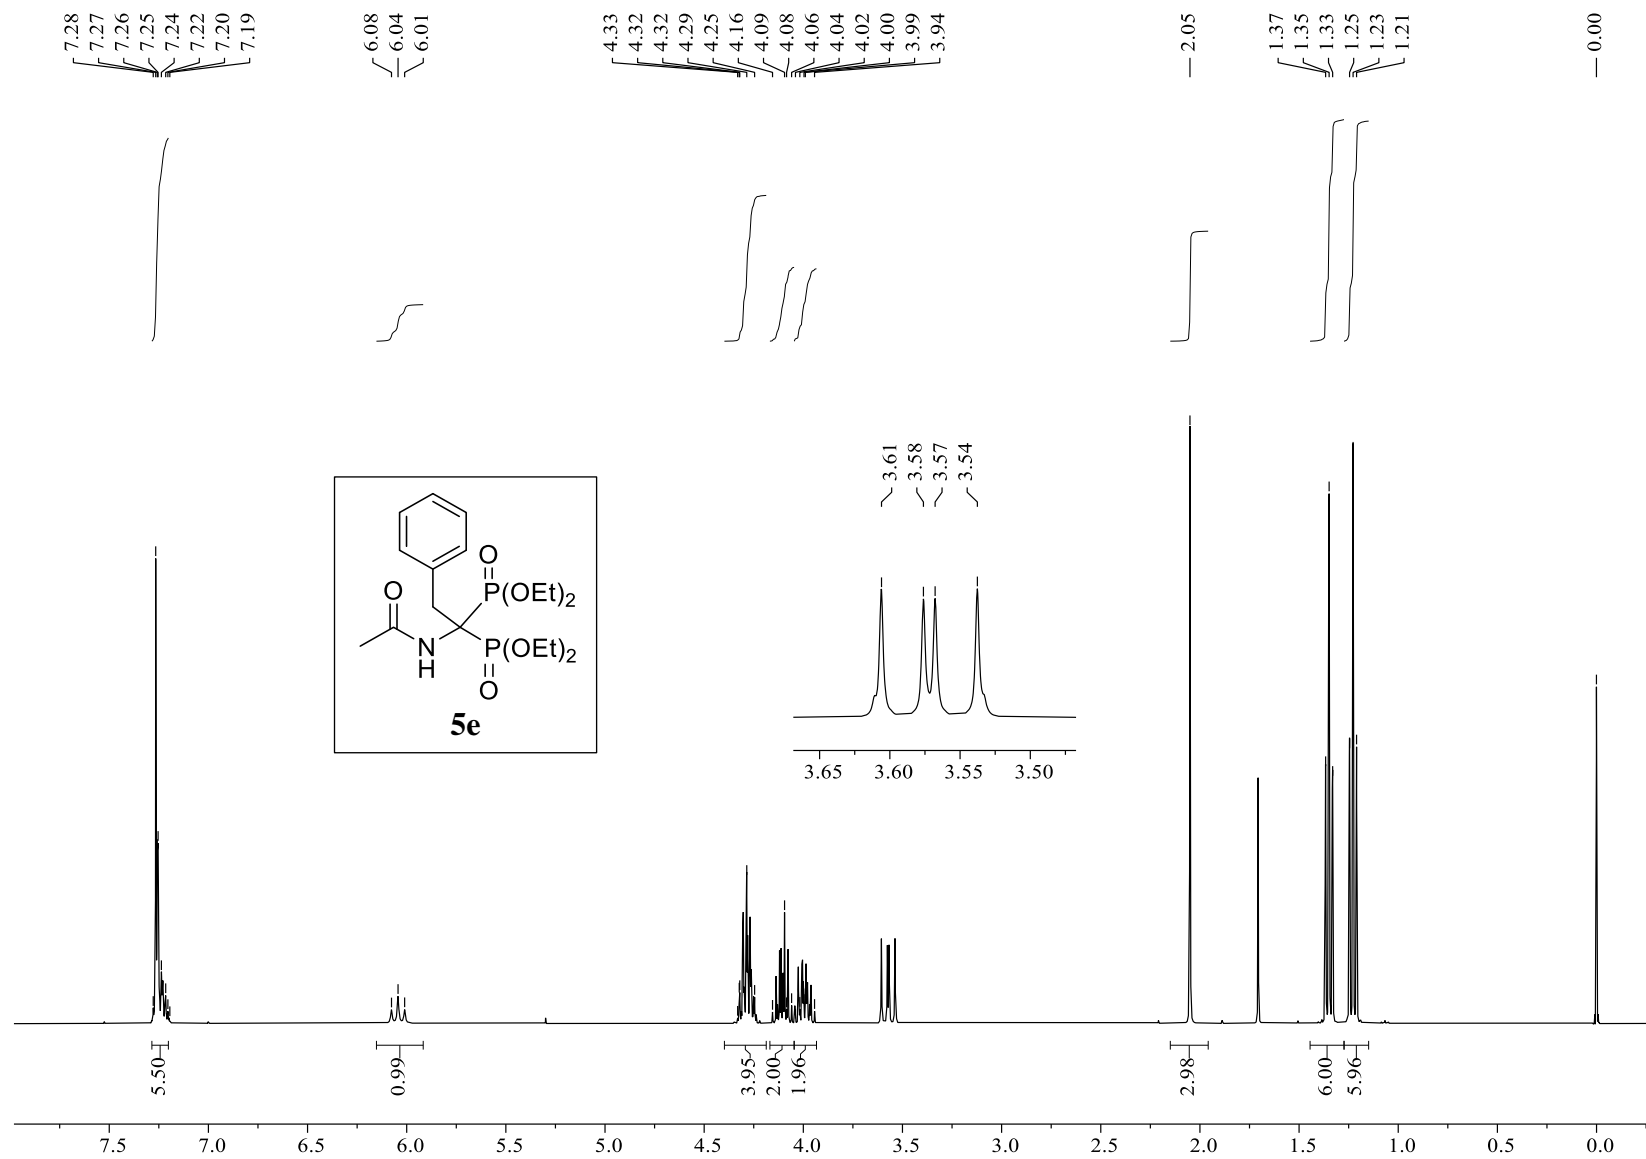

<sup>1</sup>H NMR spectrum of *tetraethyl 1-(N-acetylamino)-2-phenylethylene-1,1-bisphosphonate (5e)*; 400 MHz/CDCl<sub>3</sub>/TMS;  $\delta$  (ppm).

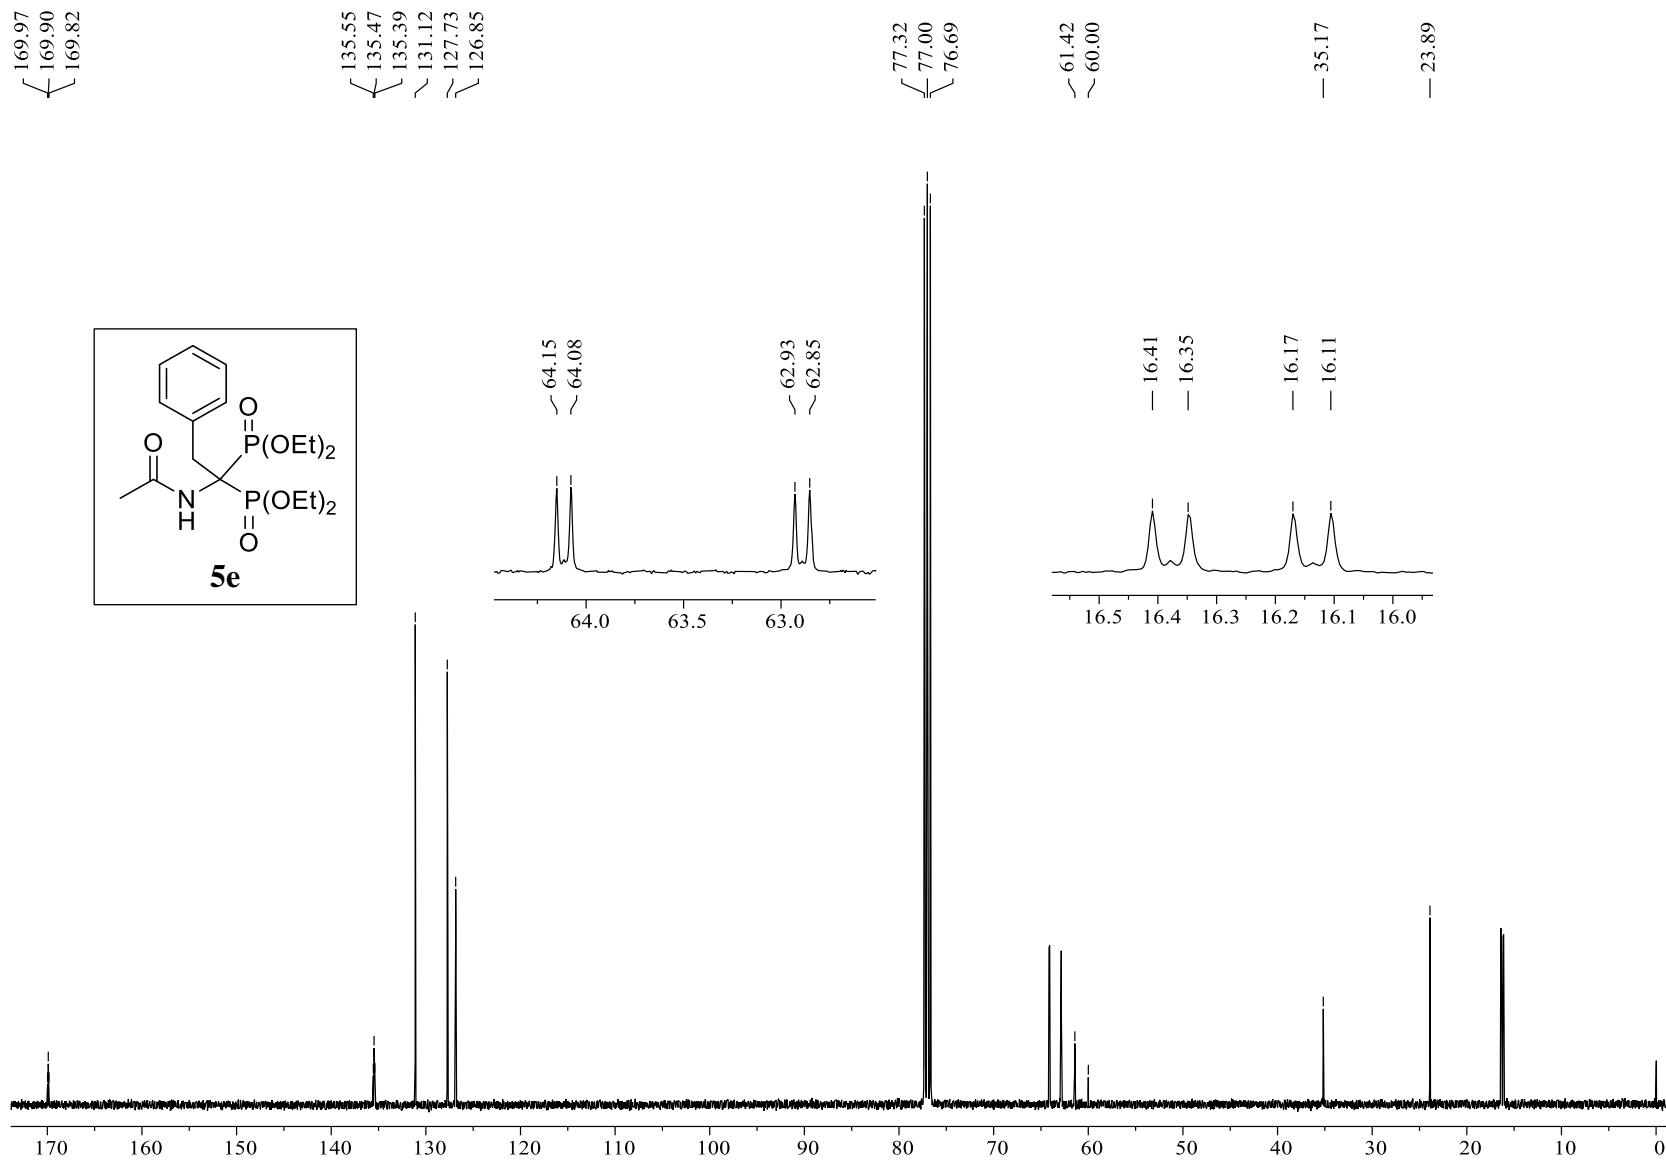

<sup>13</sup>C NMR spectrum of *tetraethyl 1-(N-acetylamino)-2-phenylethylene-1,1-bisphosphonate* (**5e**); 100 MHz/CDCl<sub>3</sub>/TMS; δ (ppm).



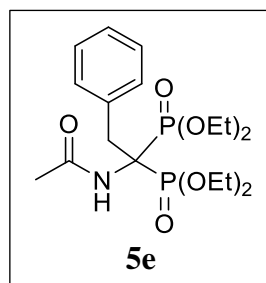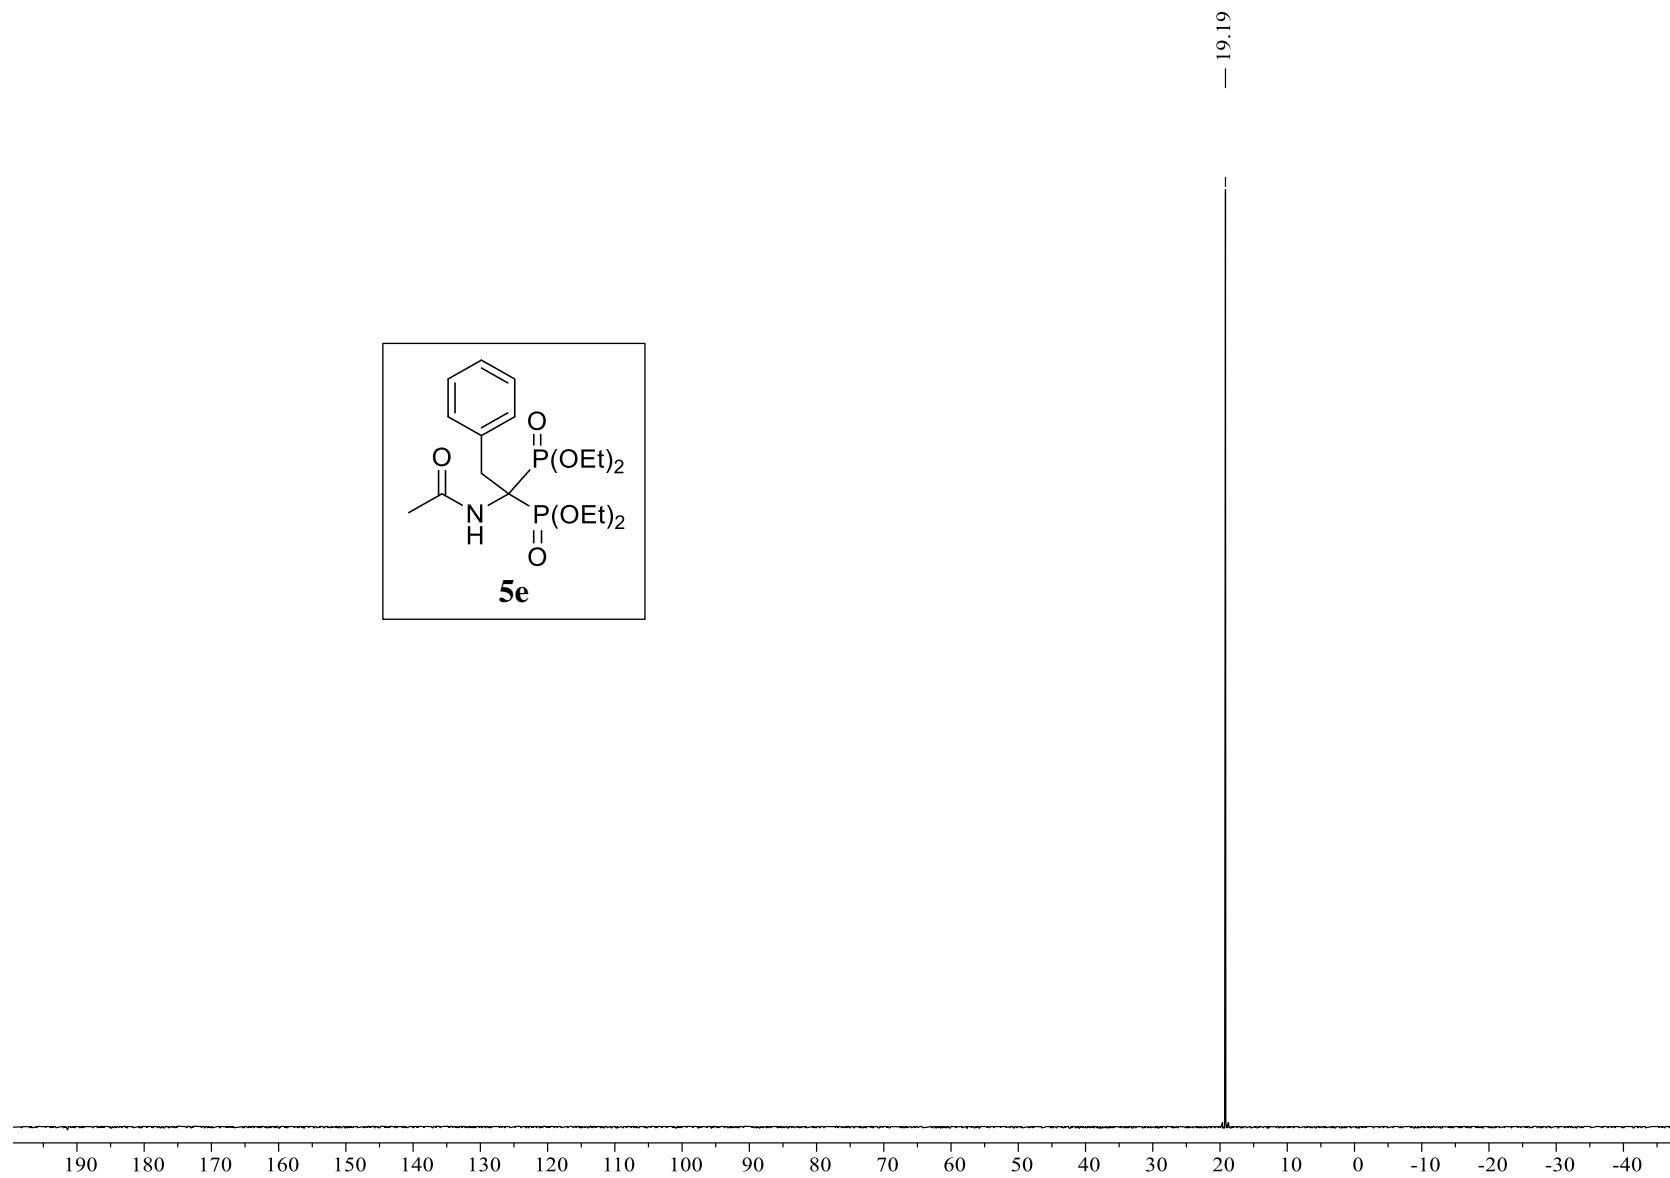

$^{31}\text{P}$  NMR spectrum of *tetraethyl 1-(N-acetylamino)-2-phenylethylene-1,1-bisphosphonate (5e)*; 162 MHz/ $\text{CDCl}_3/\text{TMS}$ ;  $\delta$  (ppm).

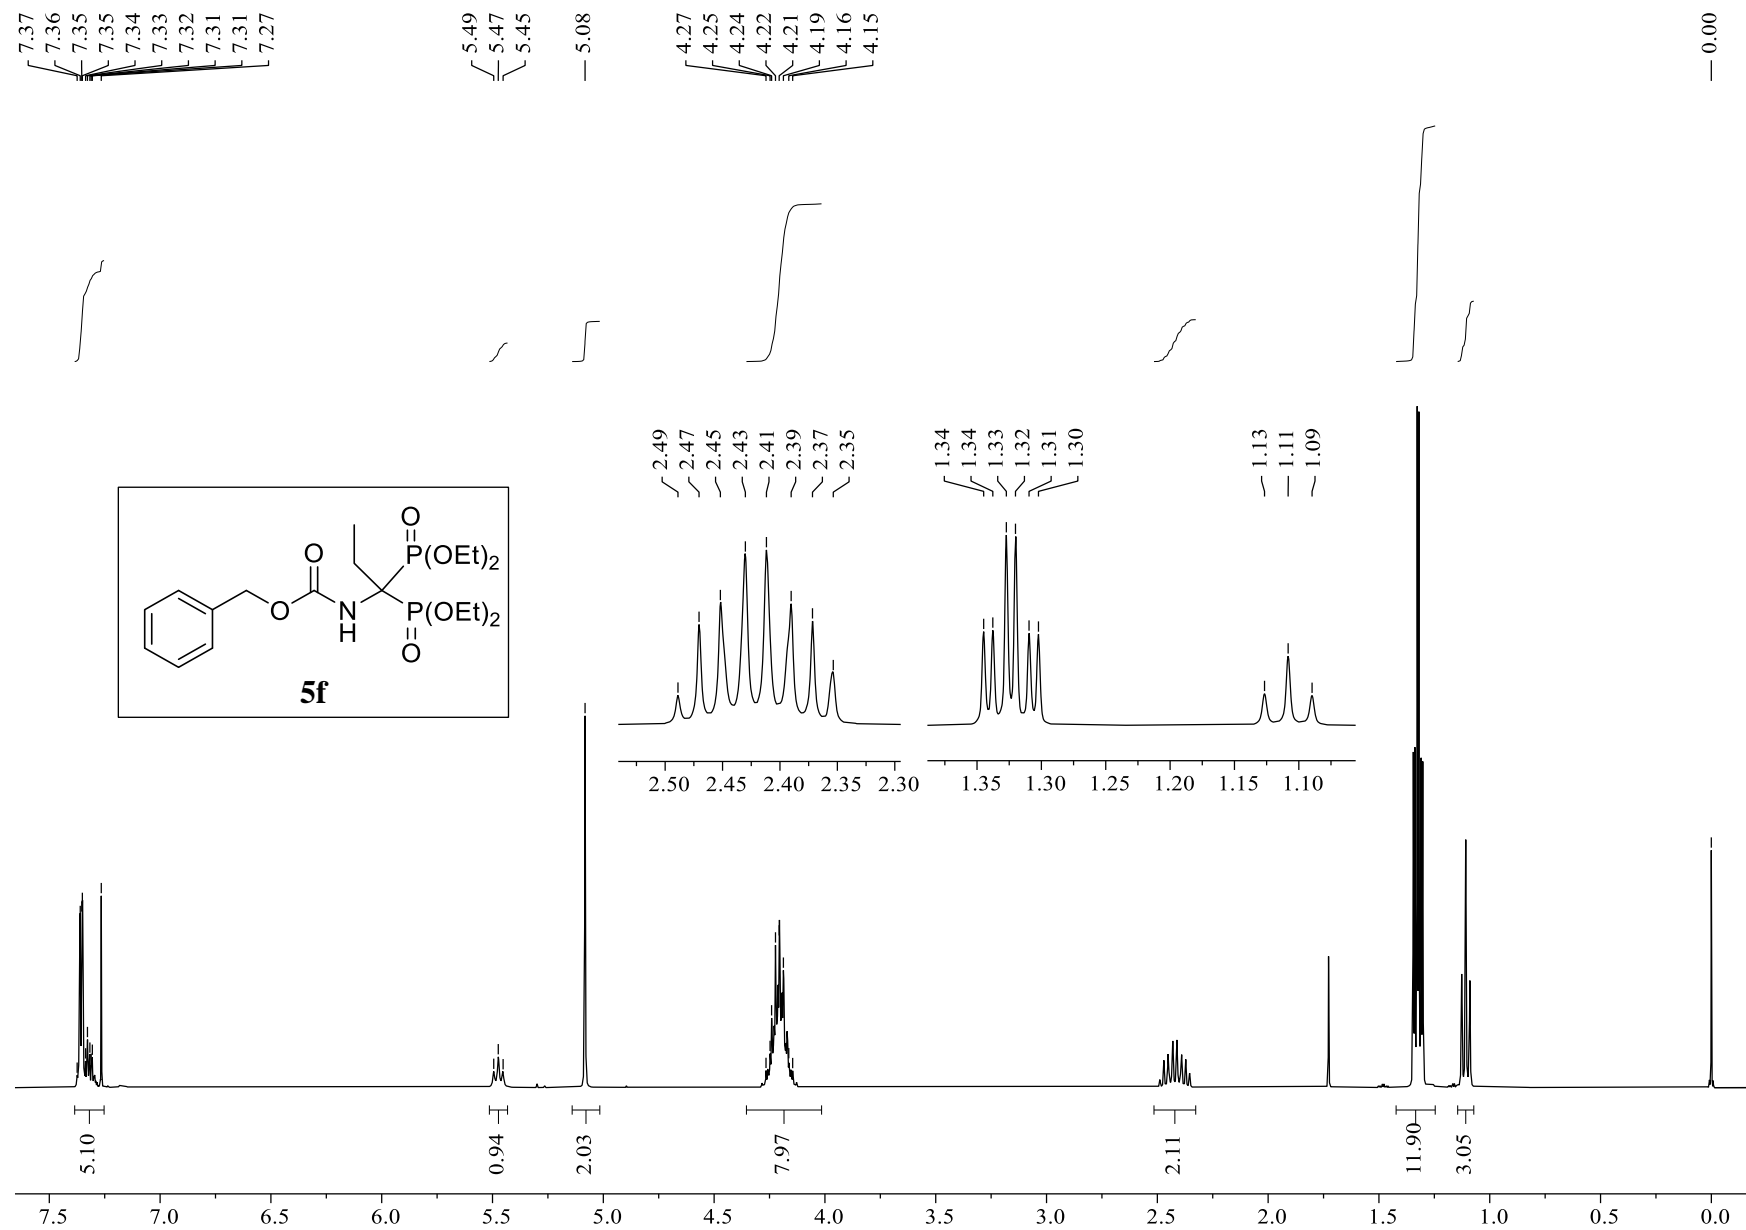

<sup>1</sup>H NMR spectrum of *tetraethyl 1-(N-benzyloxycarbonylamino)propylene-1,1-bisphosphonate (5f)*; 400 MHz/CDCl<sub>3</sub>/TMS; δ (ppm).

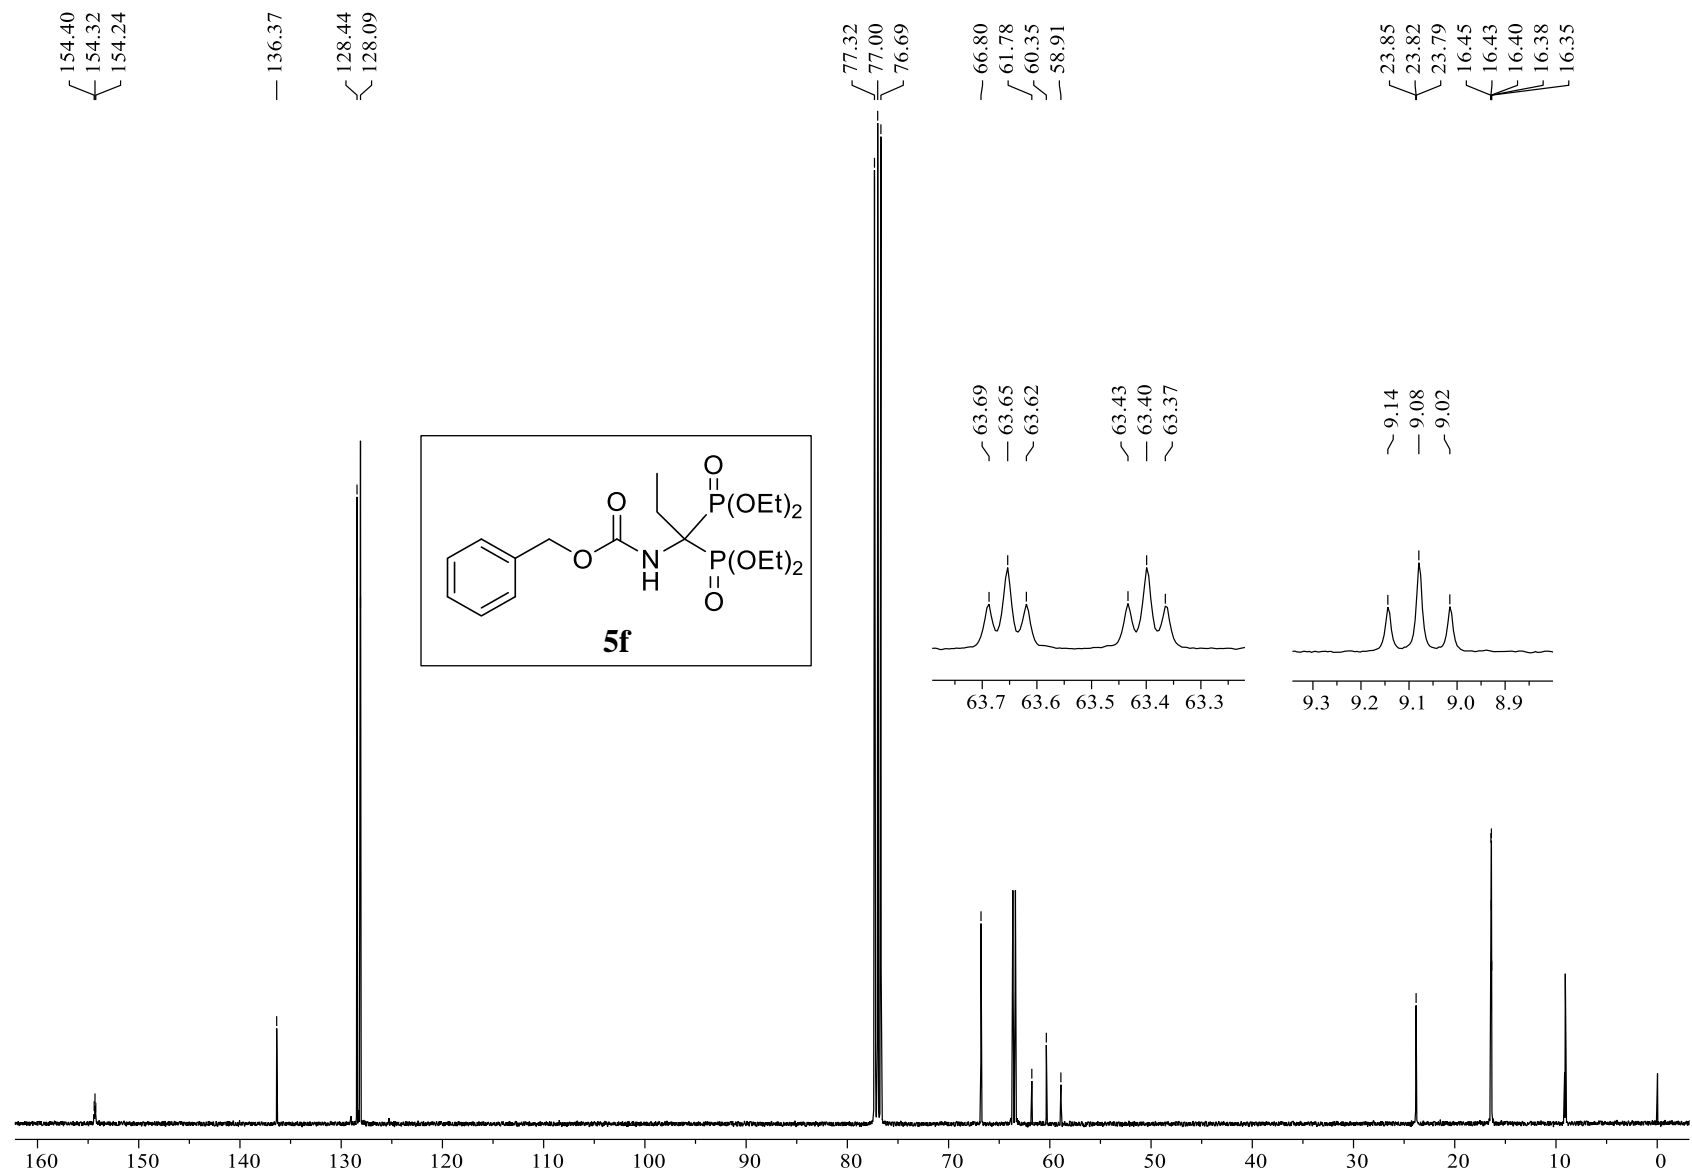

<sup>13</sup>C NMR spectrum of *tetraethyl 1-(N-benzyloxycarbonylamino)propylene-1,1-bisphosphonate (5f)*; 100 MHz/CDCl<sub>3</sub>/TMS;  $\delta$  (ppm).

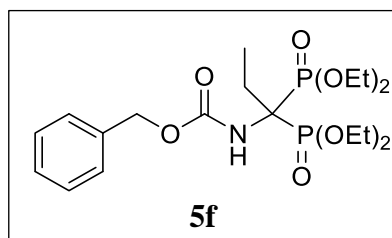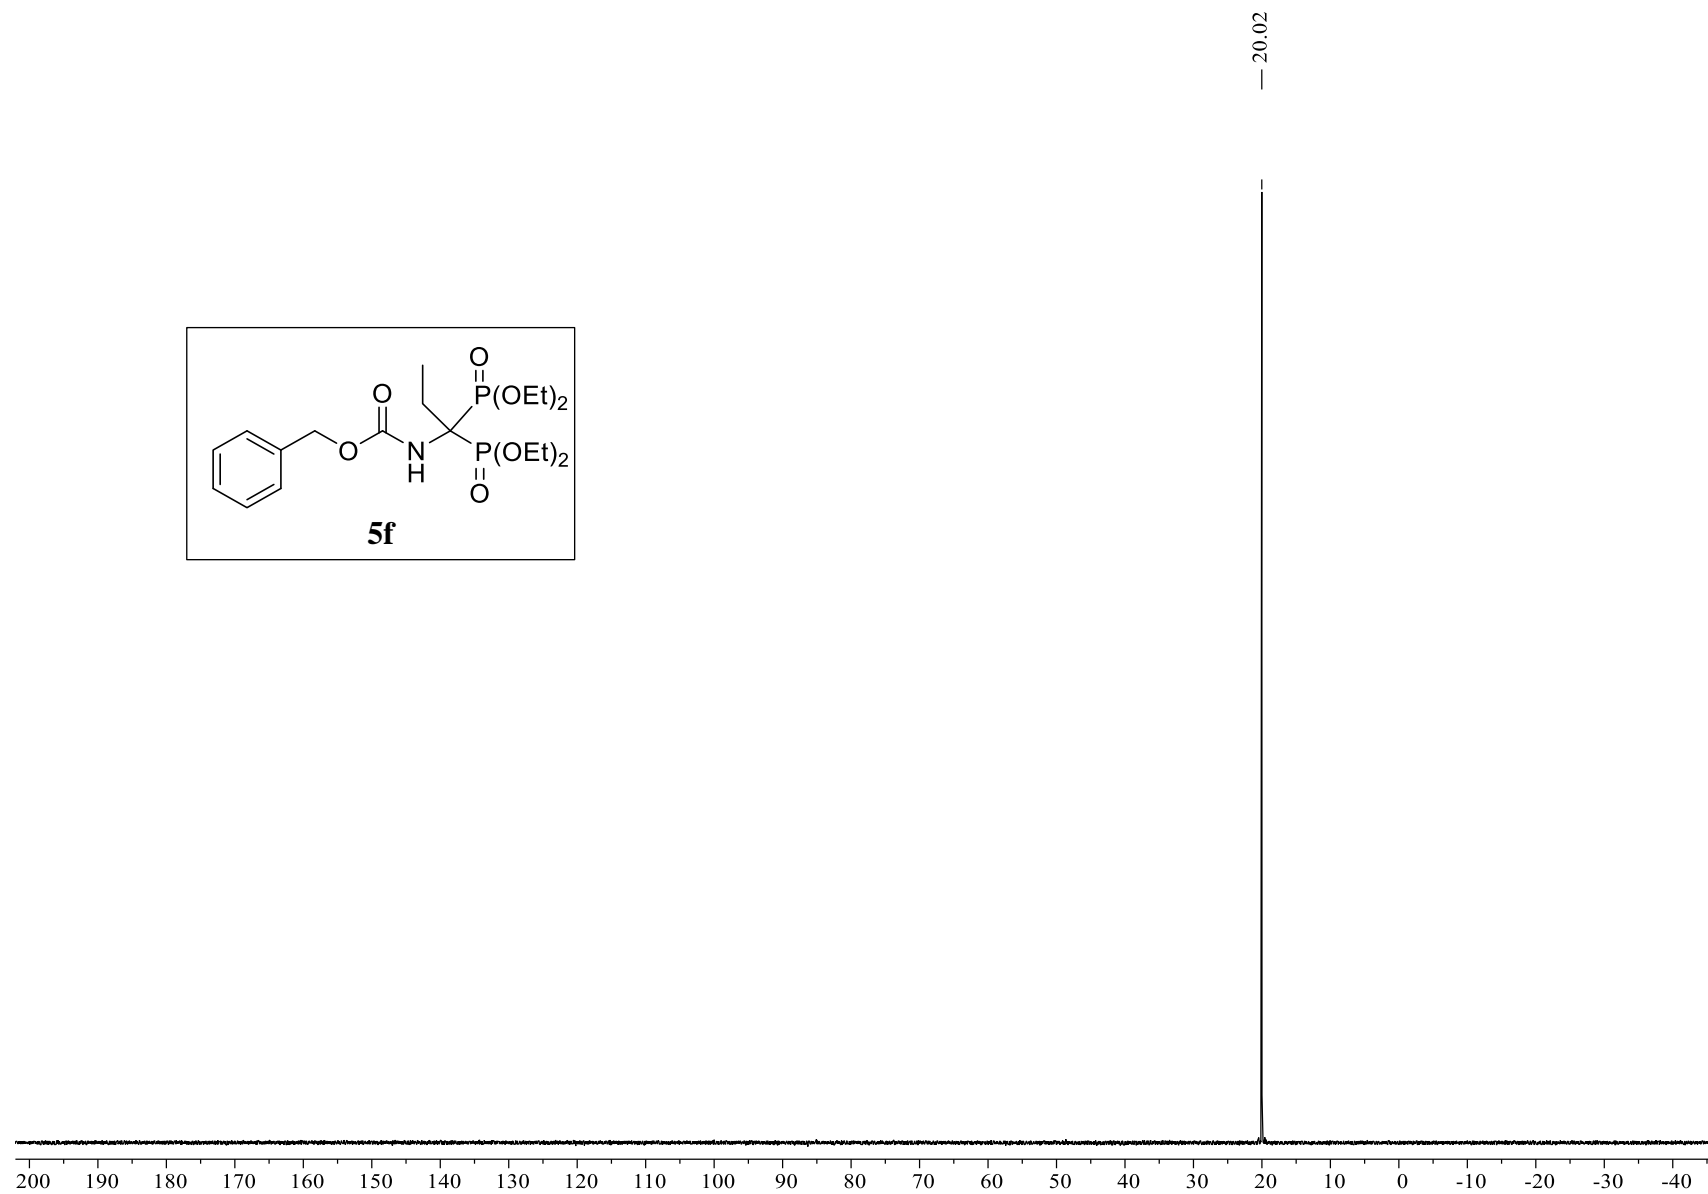

$^{31}\text{P}$  NMR spectrum of *tetraethyl 1-(N-benzyloxycarbonylamino)propylene-1,1-bisphosphonate (5f)*; 162 MHz/ $\text{CDCl}_3/\text{TMS}$ ;  $\delta$  (ppm).

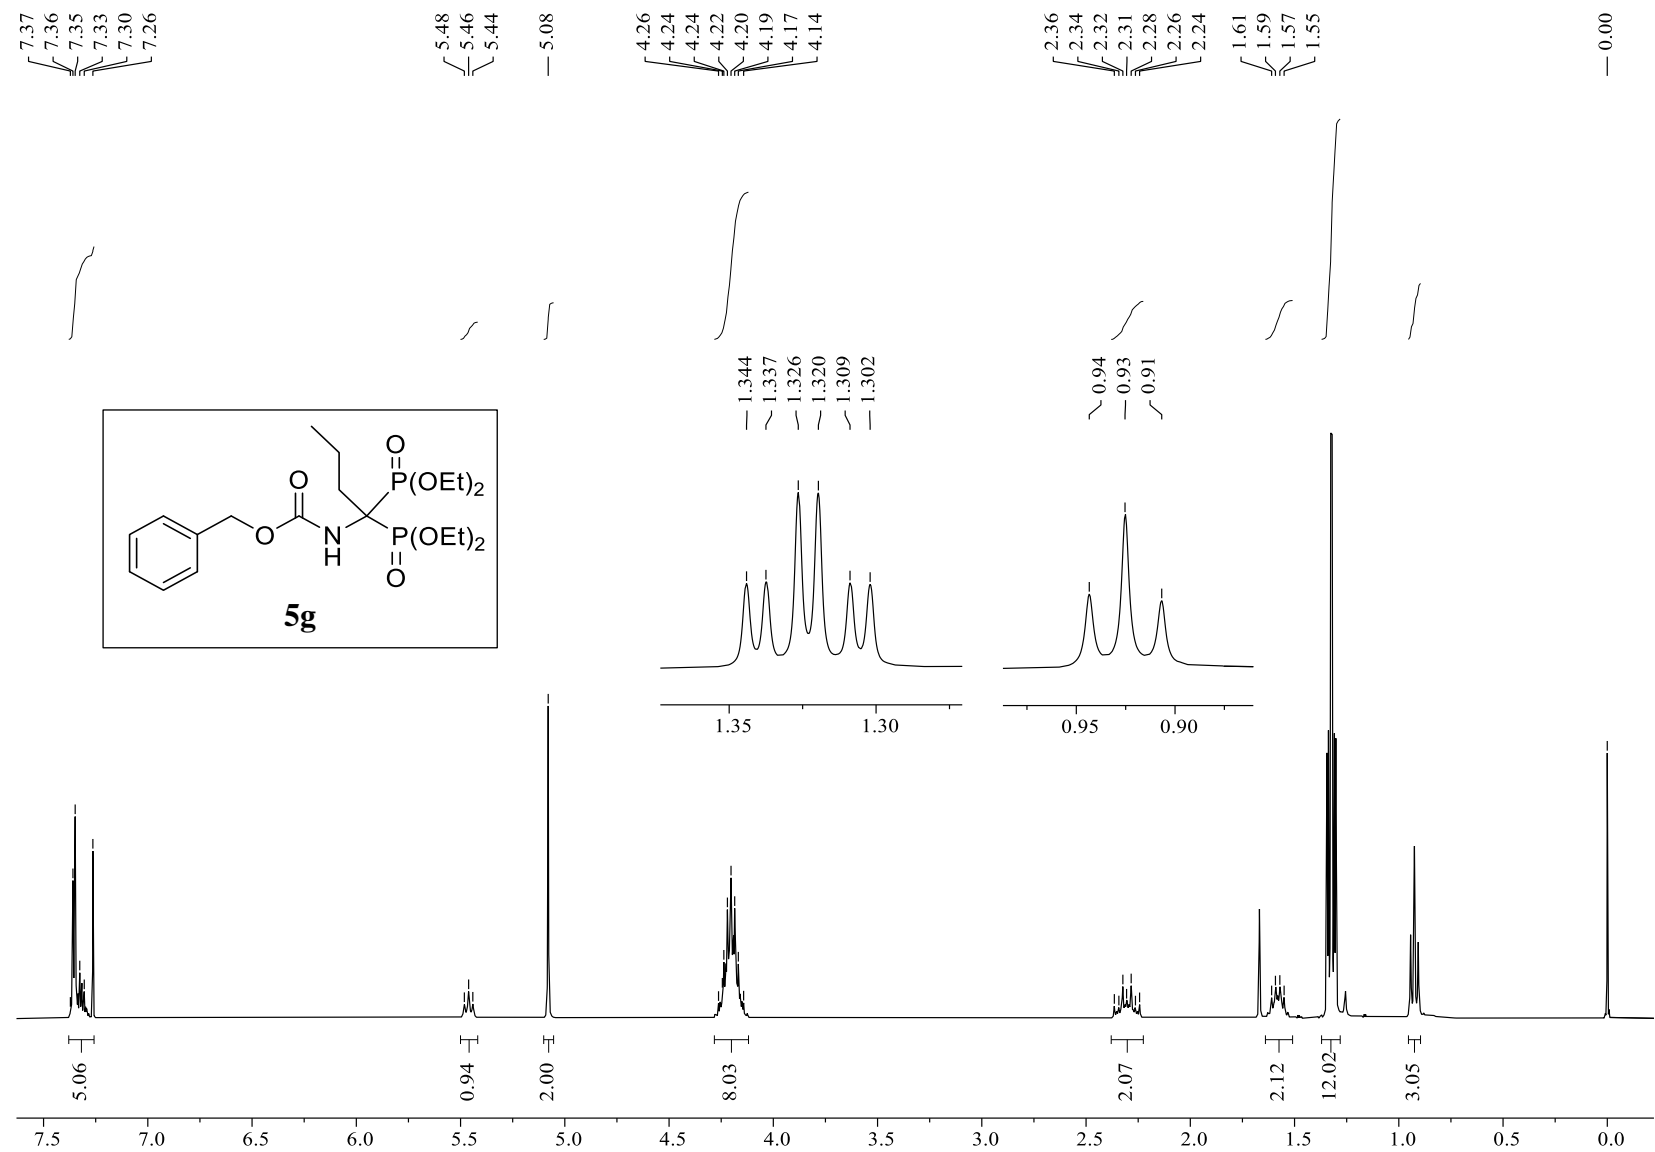

<sup>1</sup>H NMR spectrum of *tetraethyl 1-(N-benzoyloxycarbonylamino)butylene-1,1-bisphosphonate (5g)*; 400 MHz/CDCl<sub>3</sub>/TMS; δ (ppm).

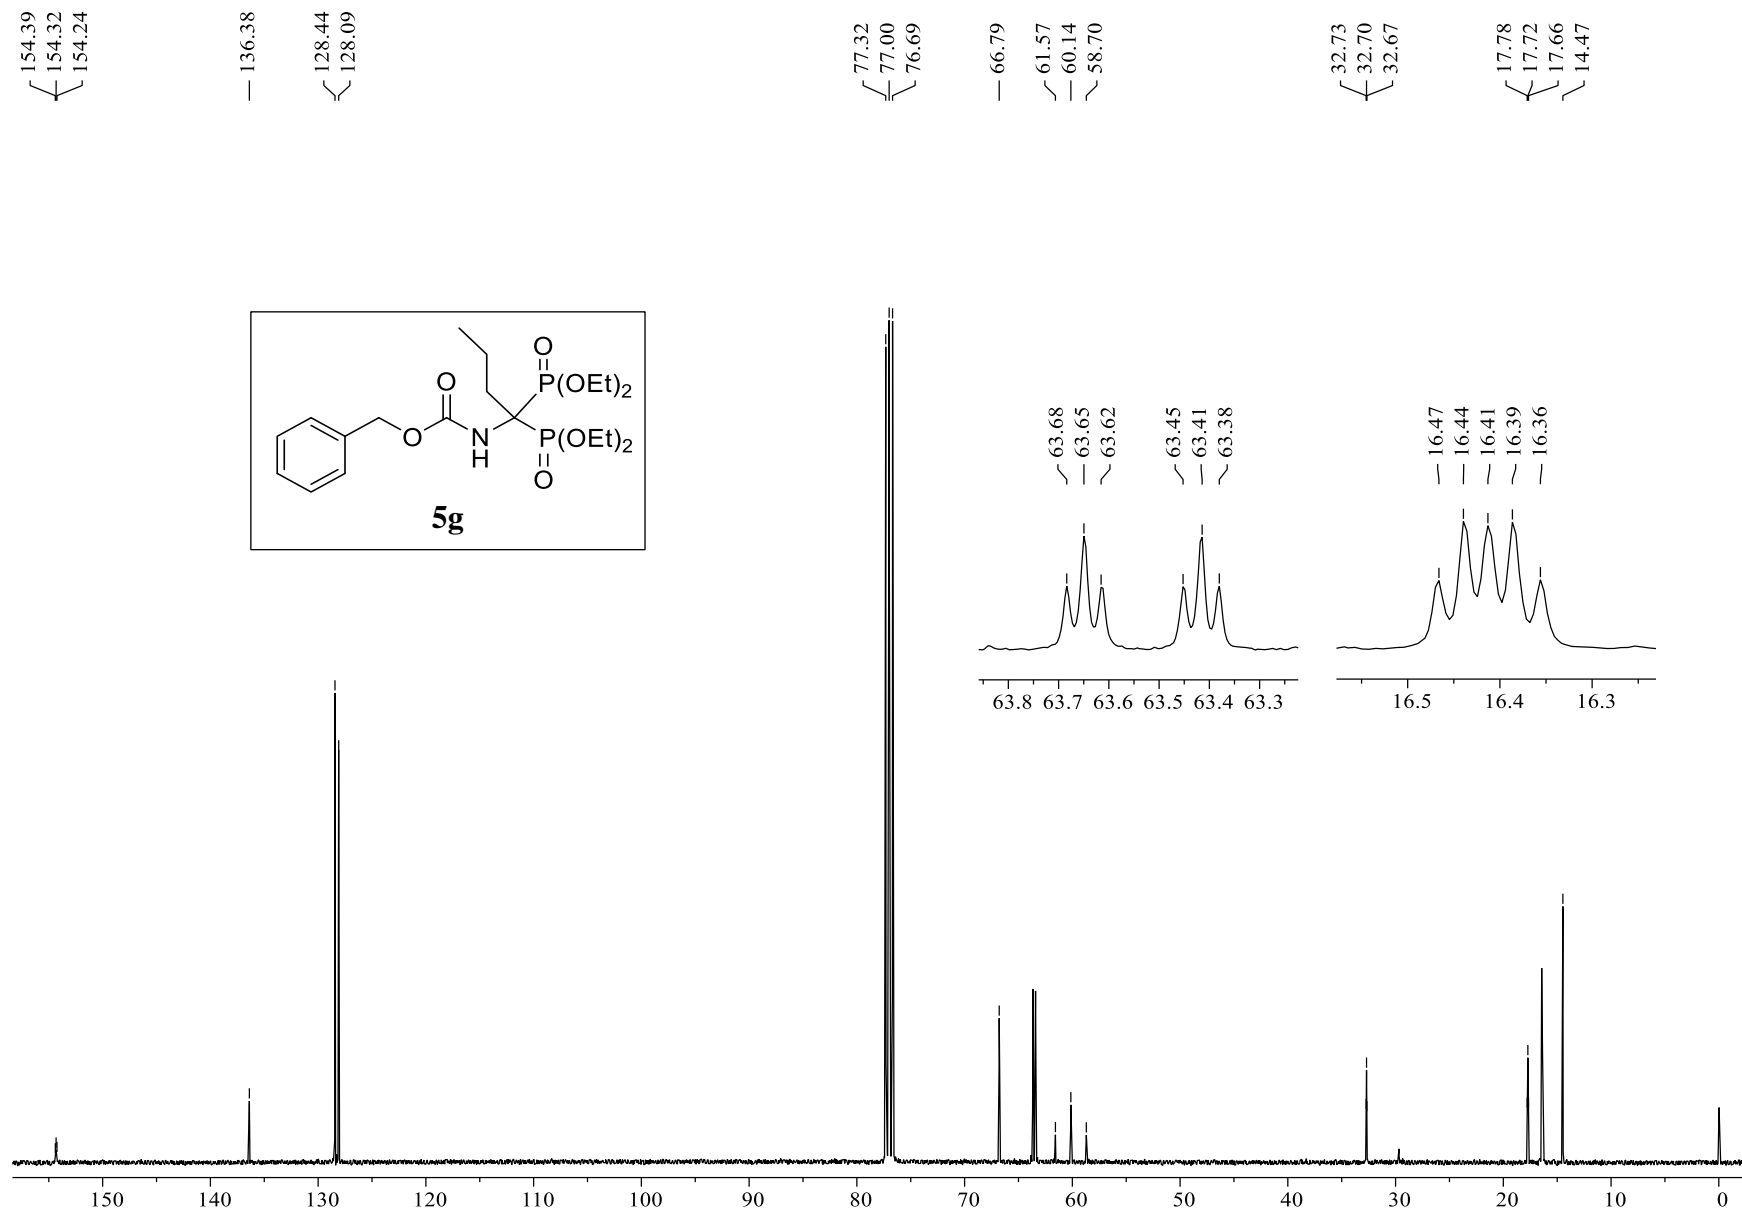

<sup>13</sup>C NMR spectrum of *tetraethyl 1-(N-benzyloxycarbonylamino)butylene-1,1-bisphosphonate (5g)*; 100 MHz/CDCl<sub>3</sub>/TMS; δ (ppm).

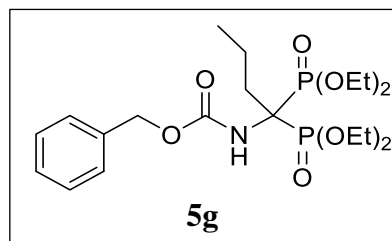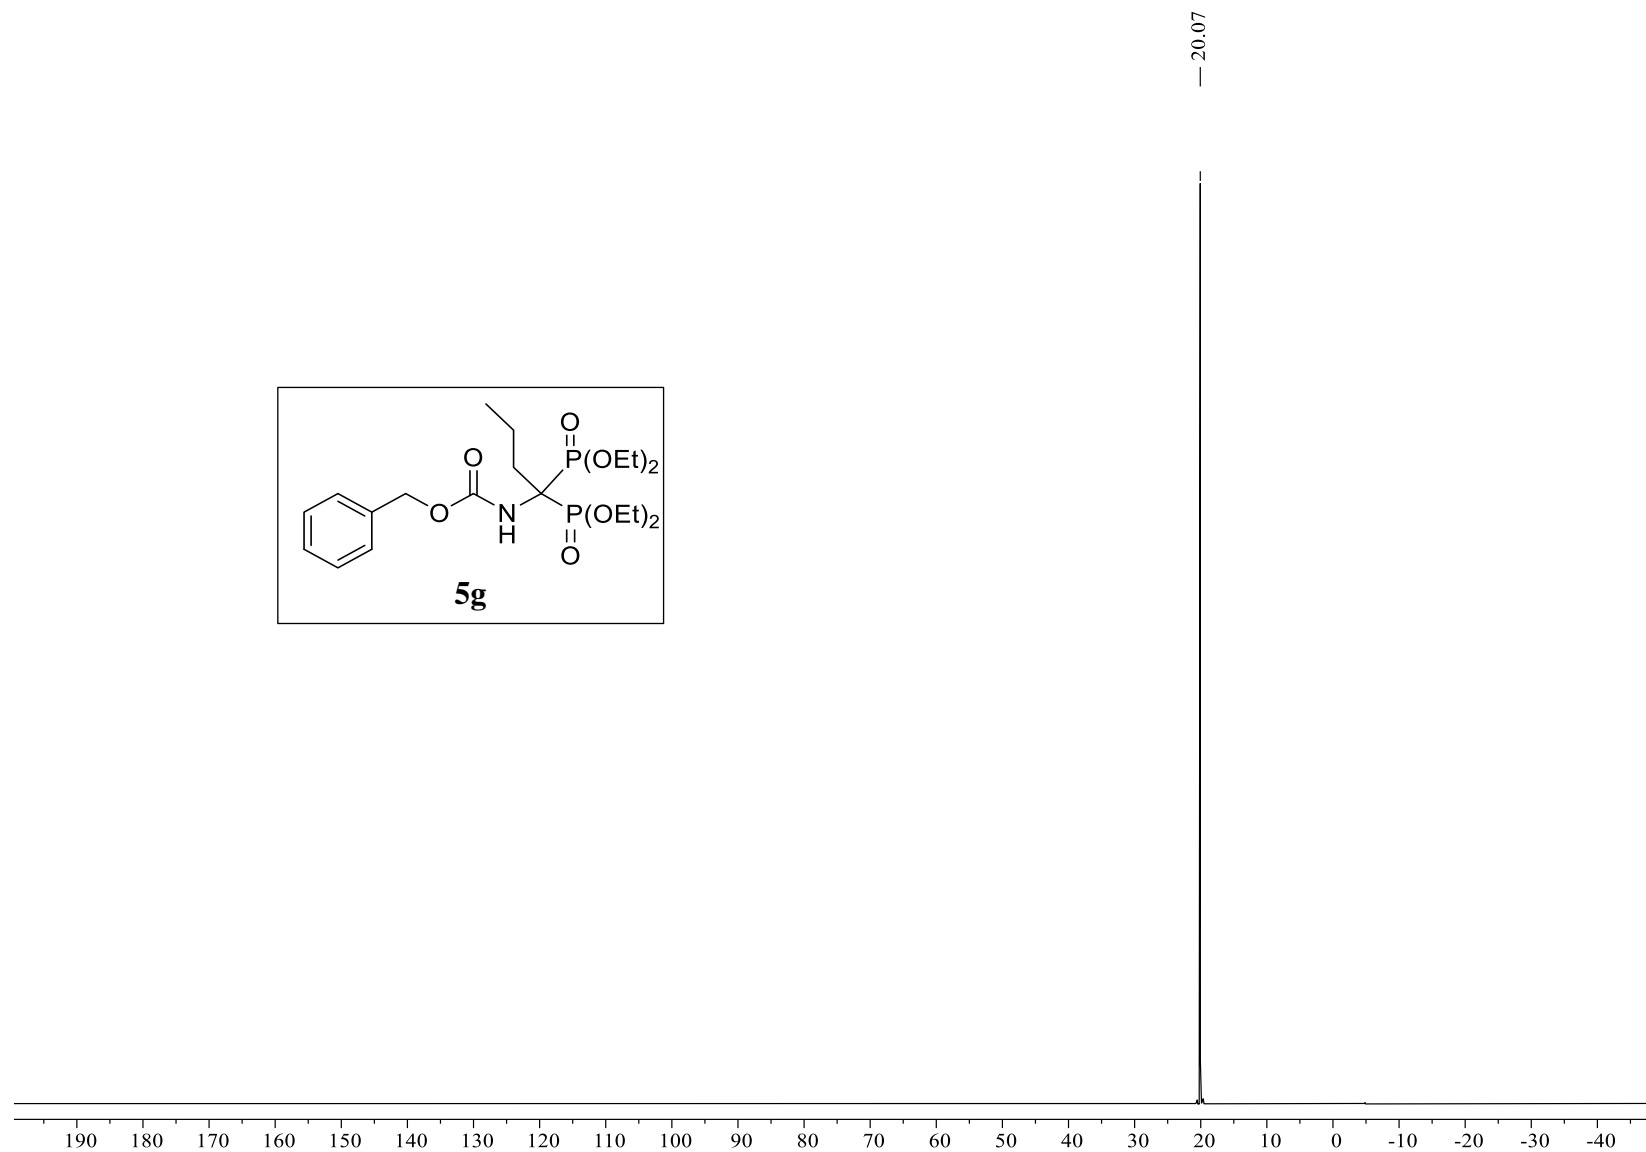

$^{31}\text{P}$  NMR spectrum of *tetraethyl 1-(N-benzyloxycarbonylamino)butylene-1,1-bisphosphonate (5g)*; 162 MHz/ $\text{CDCl}_3$ /TMS;  $\delta$  (ppm).

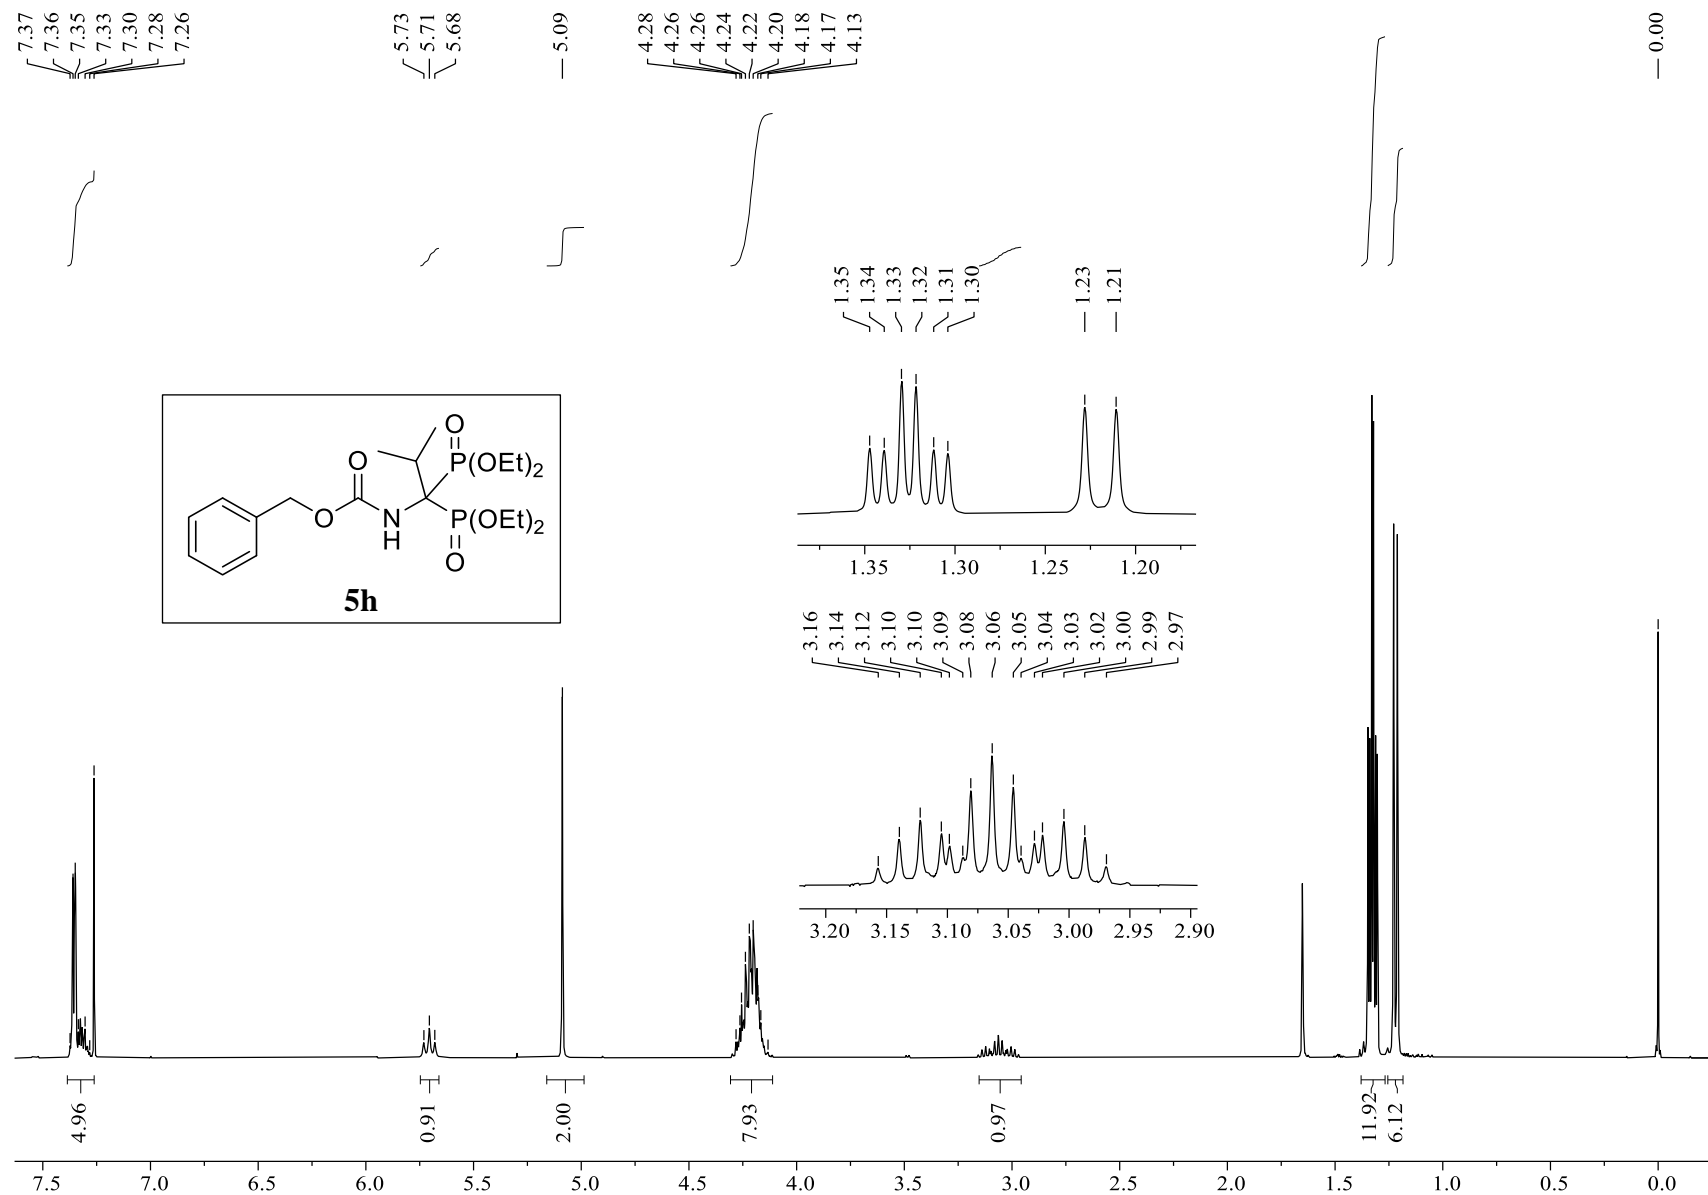

<sup>1</sup>H NMR spectrum of *tetraethyl 1-(N-benzyloxycarbonylamino)-2-methylpropylene-1,1-bisphosphonate (5h)*; 400 MHz/CDCl<sub>3</sub>/TMS; δ (ppm).



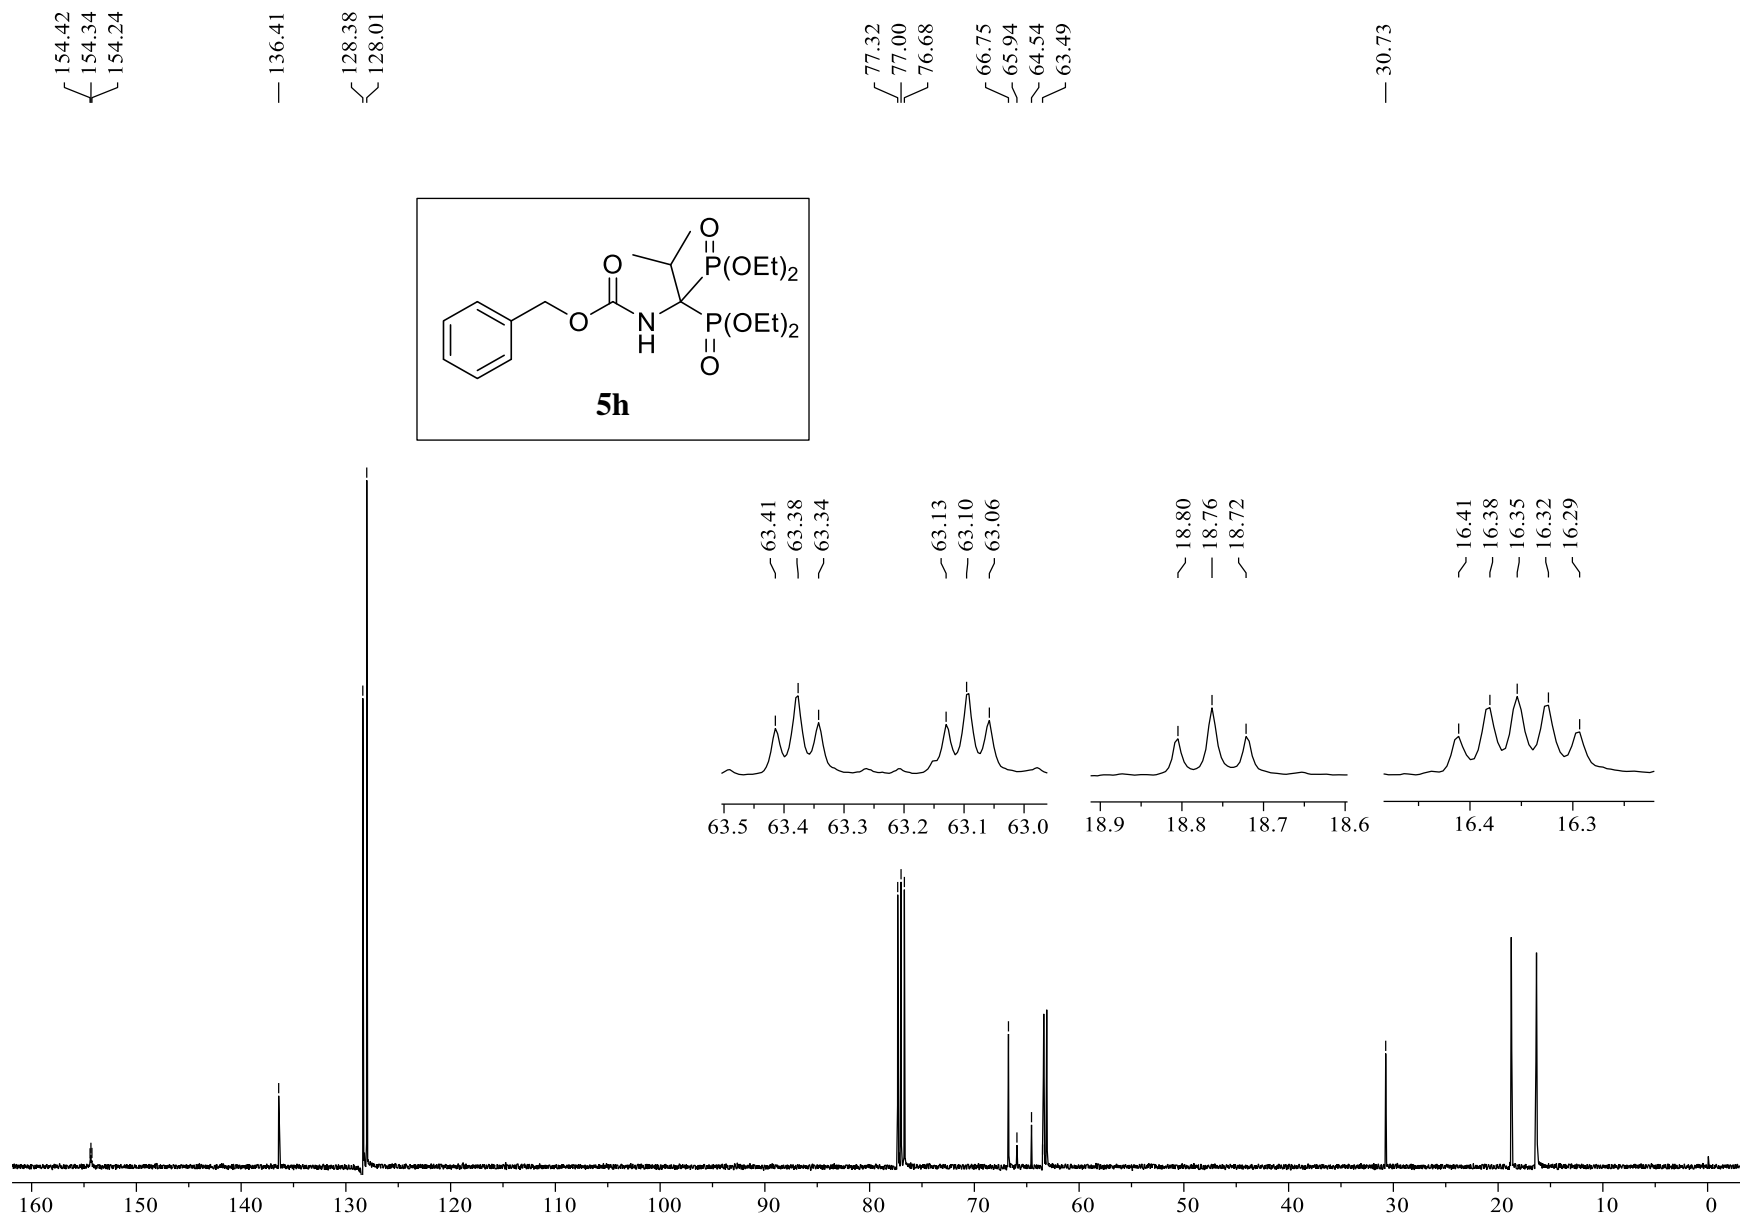

<sup>13</sup>C NMR spectrum of *tetraethyl 1-(N-benzyloxycarbonylamino)-2-methylpropylene-1,1-bisphosphonate (5h)*; 100 MHz/CDCl<sub>3</sub>/TMS; δ (ppm).

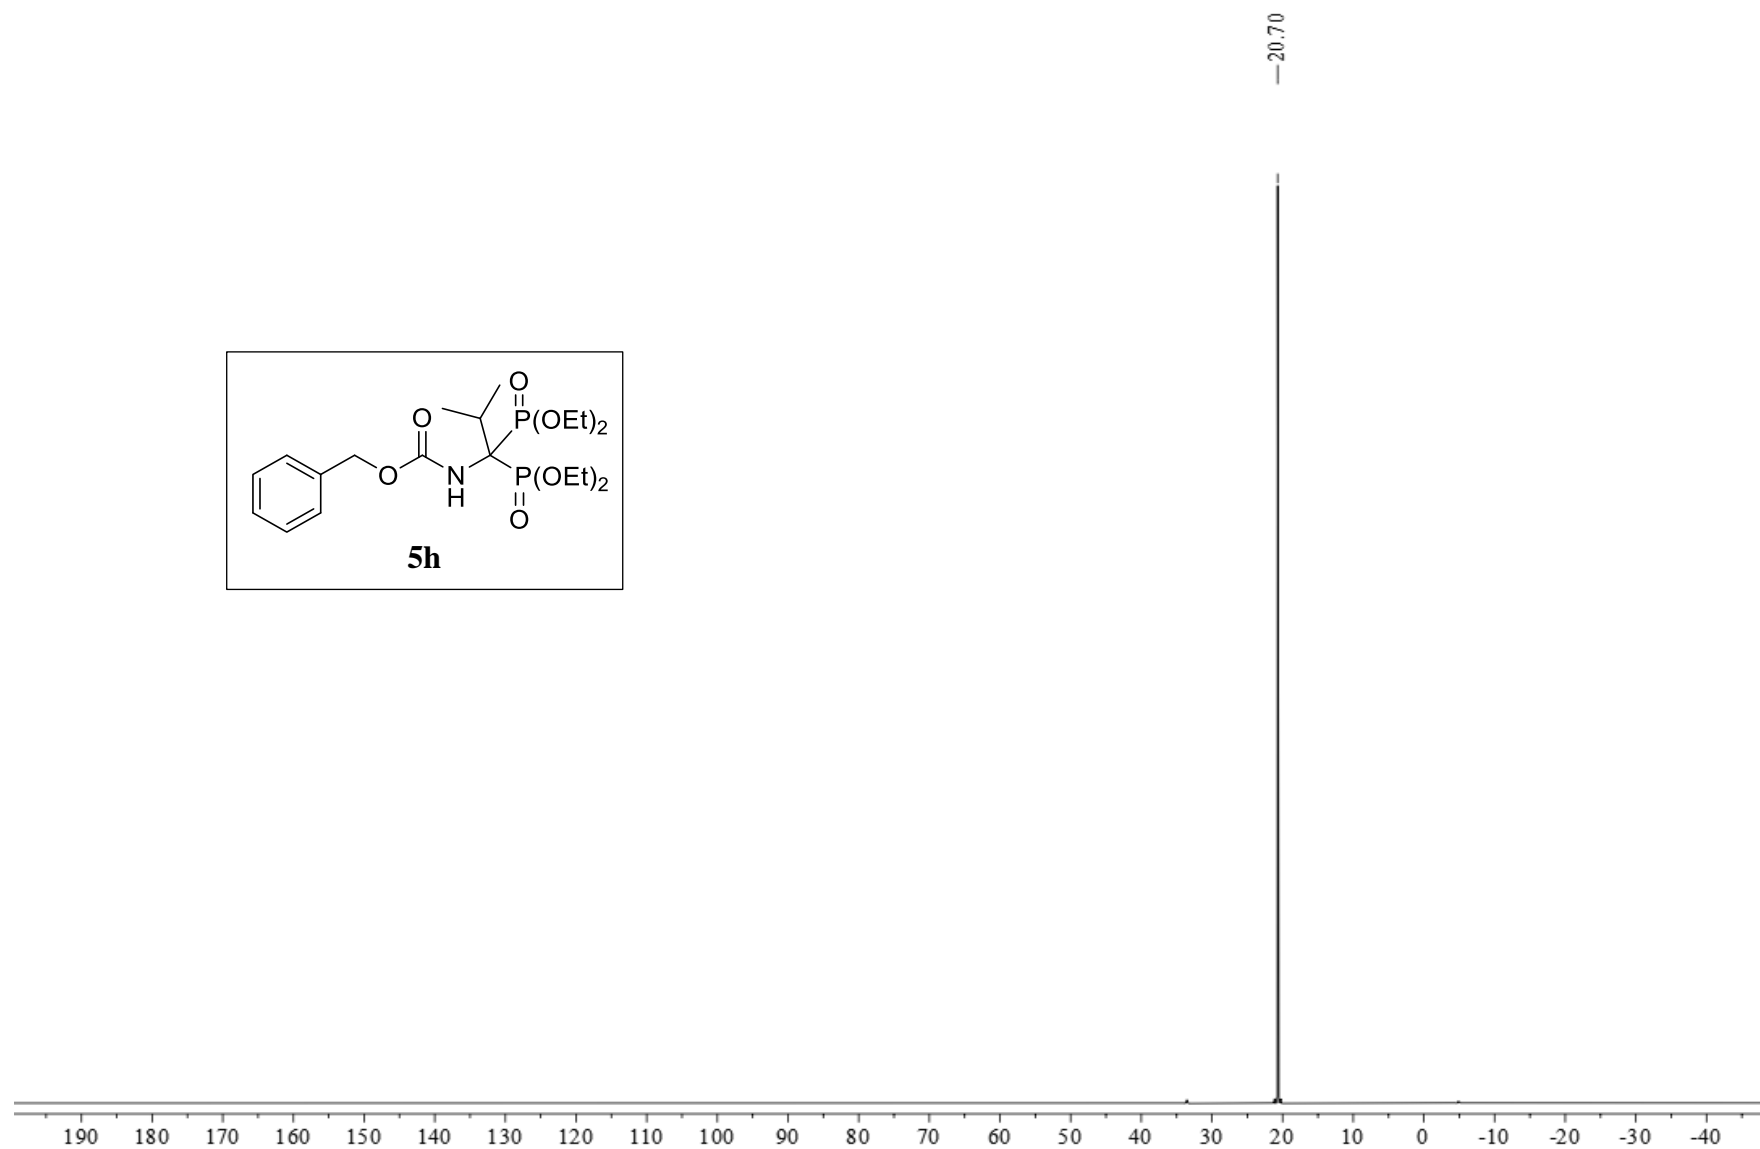

$^{31}\text{P}$  NMR spectrum of *tetraethyl 1-(N-benzyloxycarbonylamino)-2-methylpropylene-1,1-bisphosphonate (5h)*; 162 MHz/ $\text{CDCl}_3/\text{TMS}$ ;  $\delta$  (ppm).

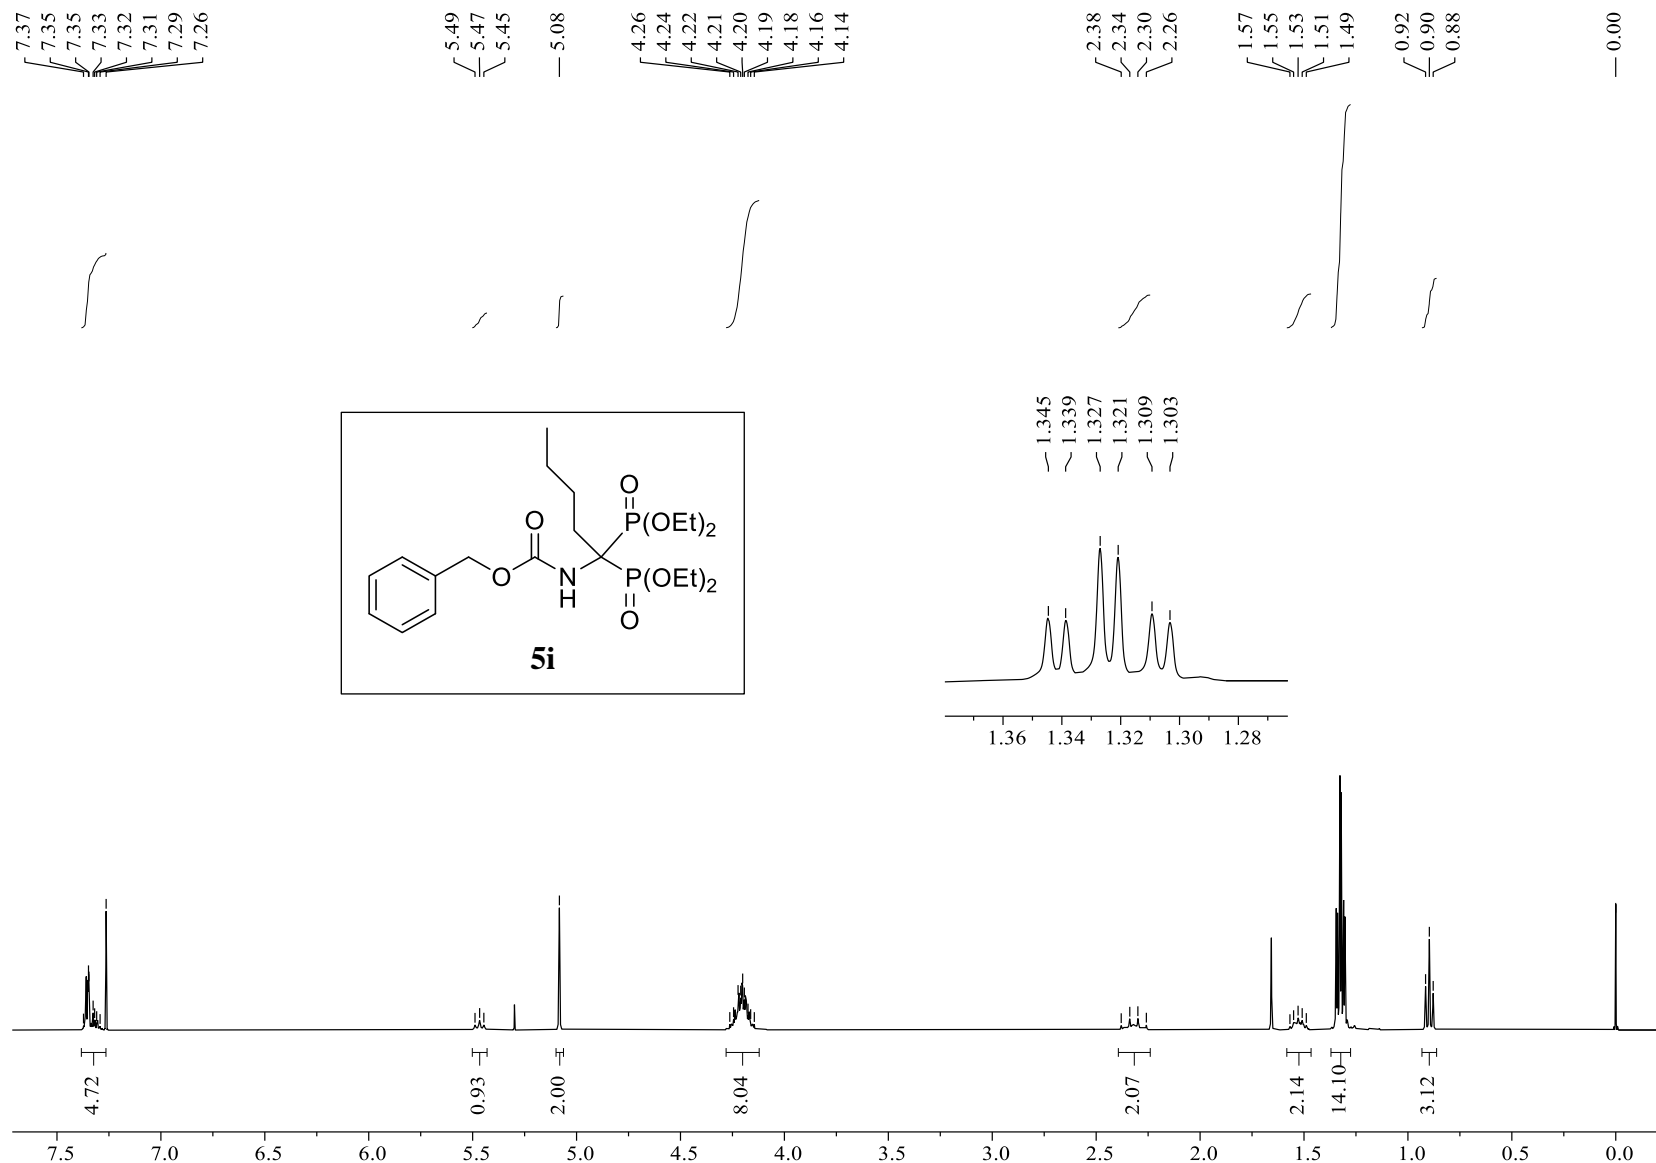

<sup>1</sup>H NMR spectrum of *tetraethyl 1-(N-benzyloxycarbonylamino)pentylene-1,1-bisphosphonate (5i)*; 400 MHz/CDCl<sub>3</sub>/TMS; δ (ppm).

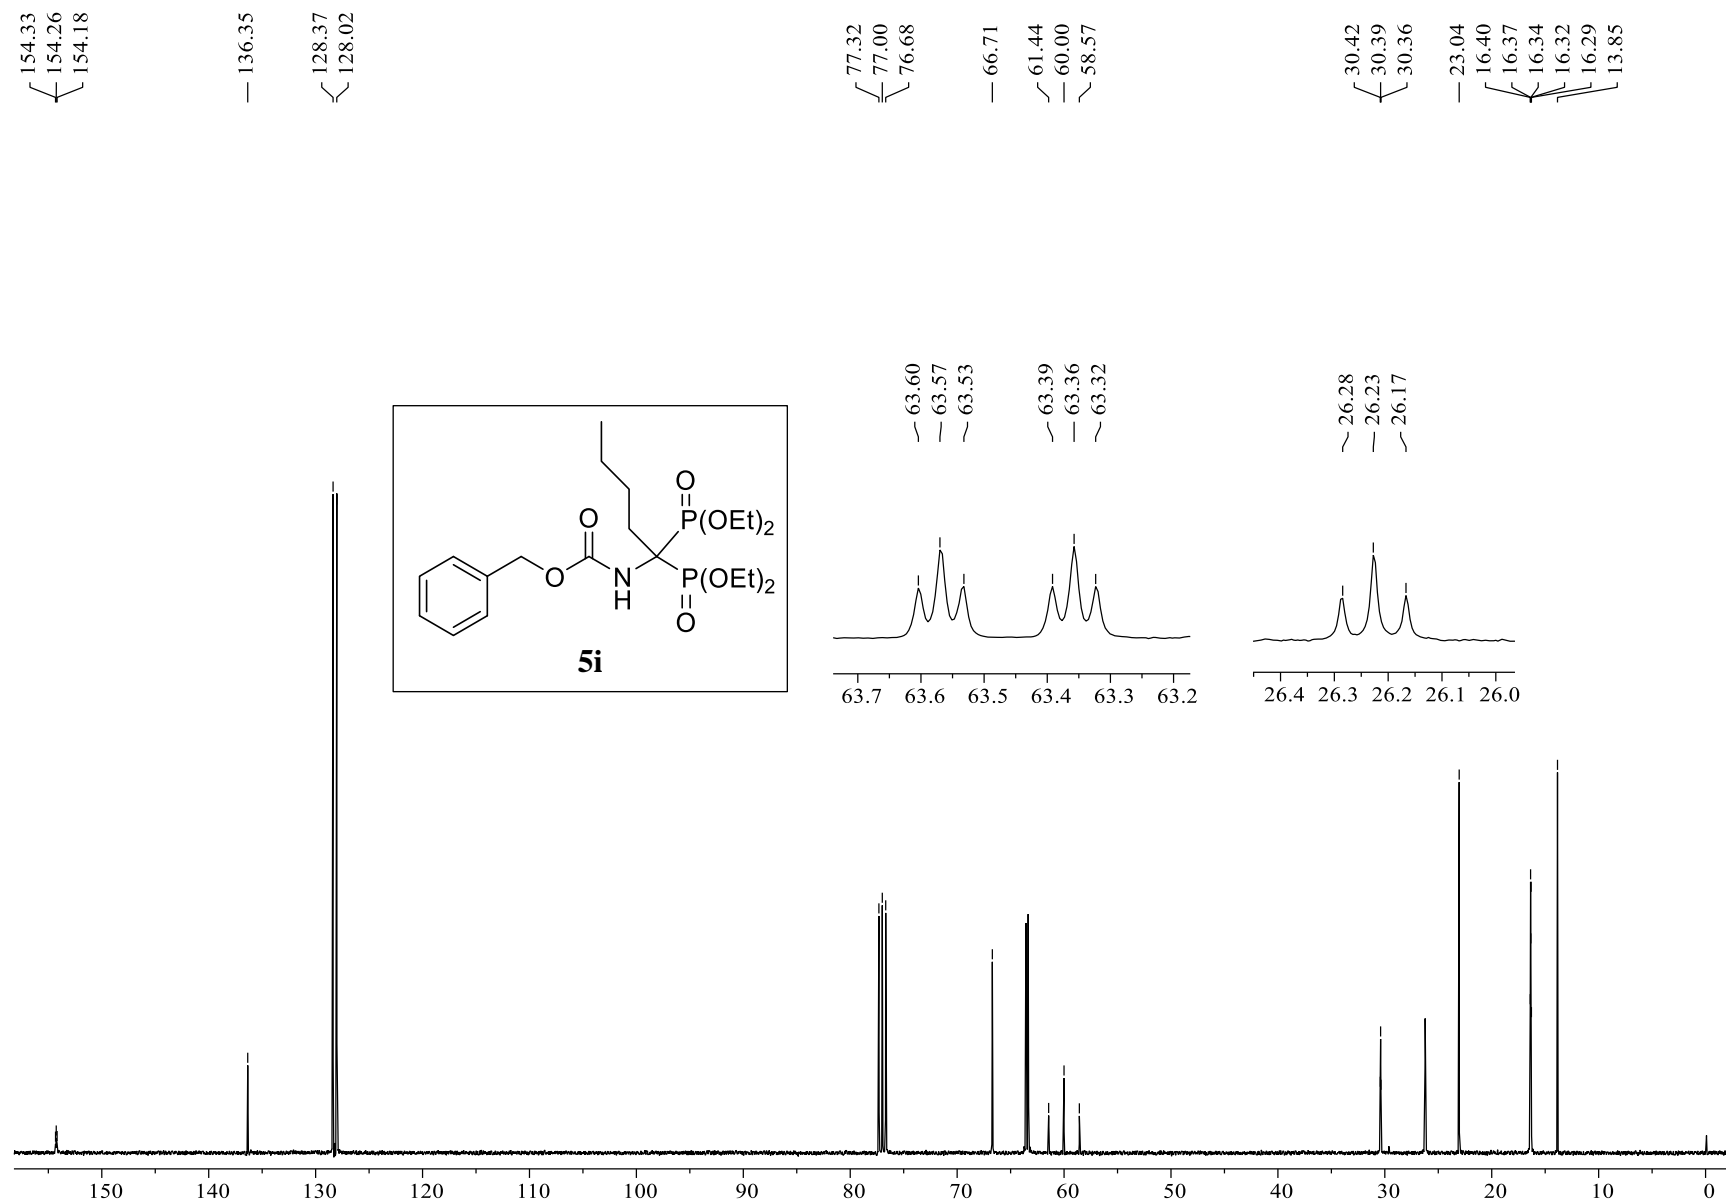

<sup>13</sup>C NMR spectrum of *tetraethyl 1-(N-benzyloxycarbonylamino)pentylene-1,1-bisphosphonate (5i)*; 100 MHz/CDCl<sub>3</sub>/TMS;  $\delta$  (ppm).

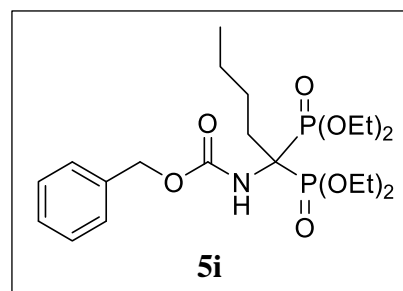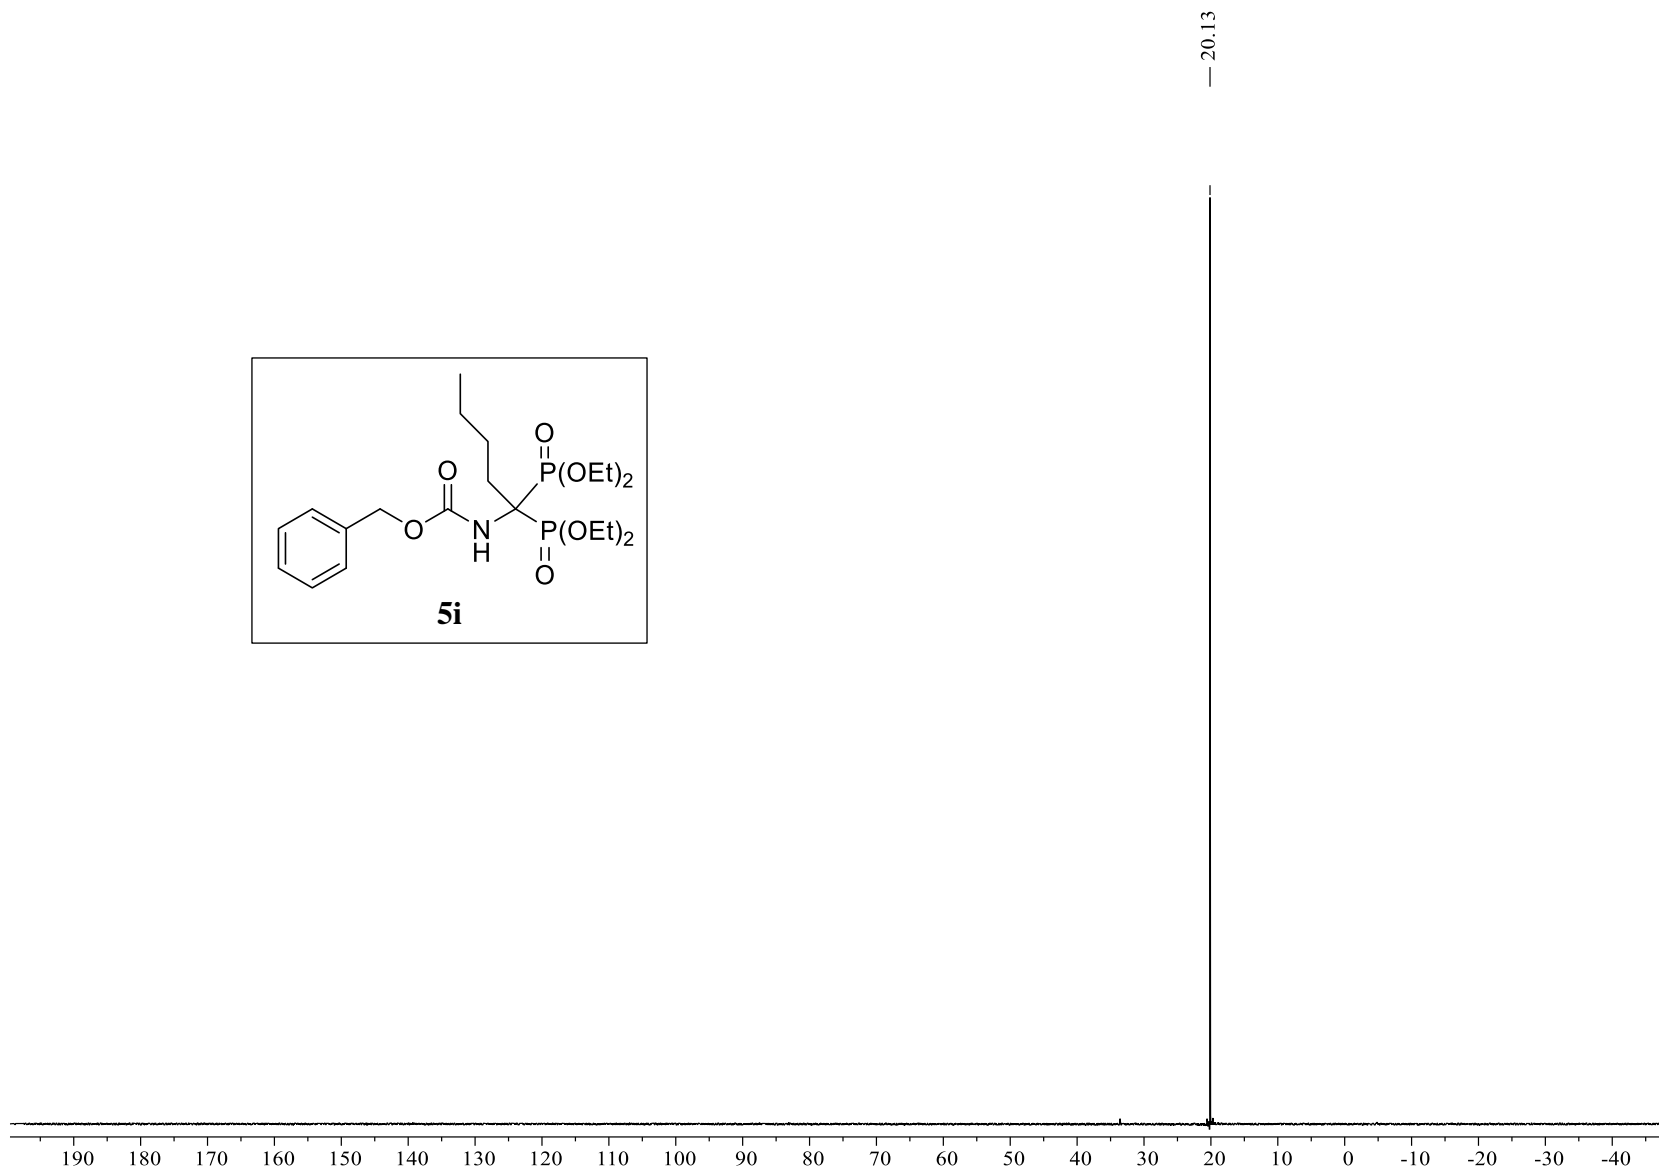

$^{31}\text{P}$  NMR spectrum of *tetraethyl 1-(N-benzyloxycarbonylamino)pentylene-1,1-bisphosphonate (5i)*; 162 MHz/ $\text{CDCl}_3$ /TMS;  $\delta$  (ppm).

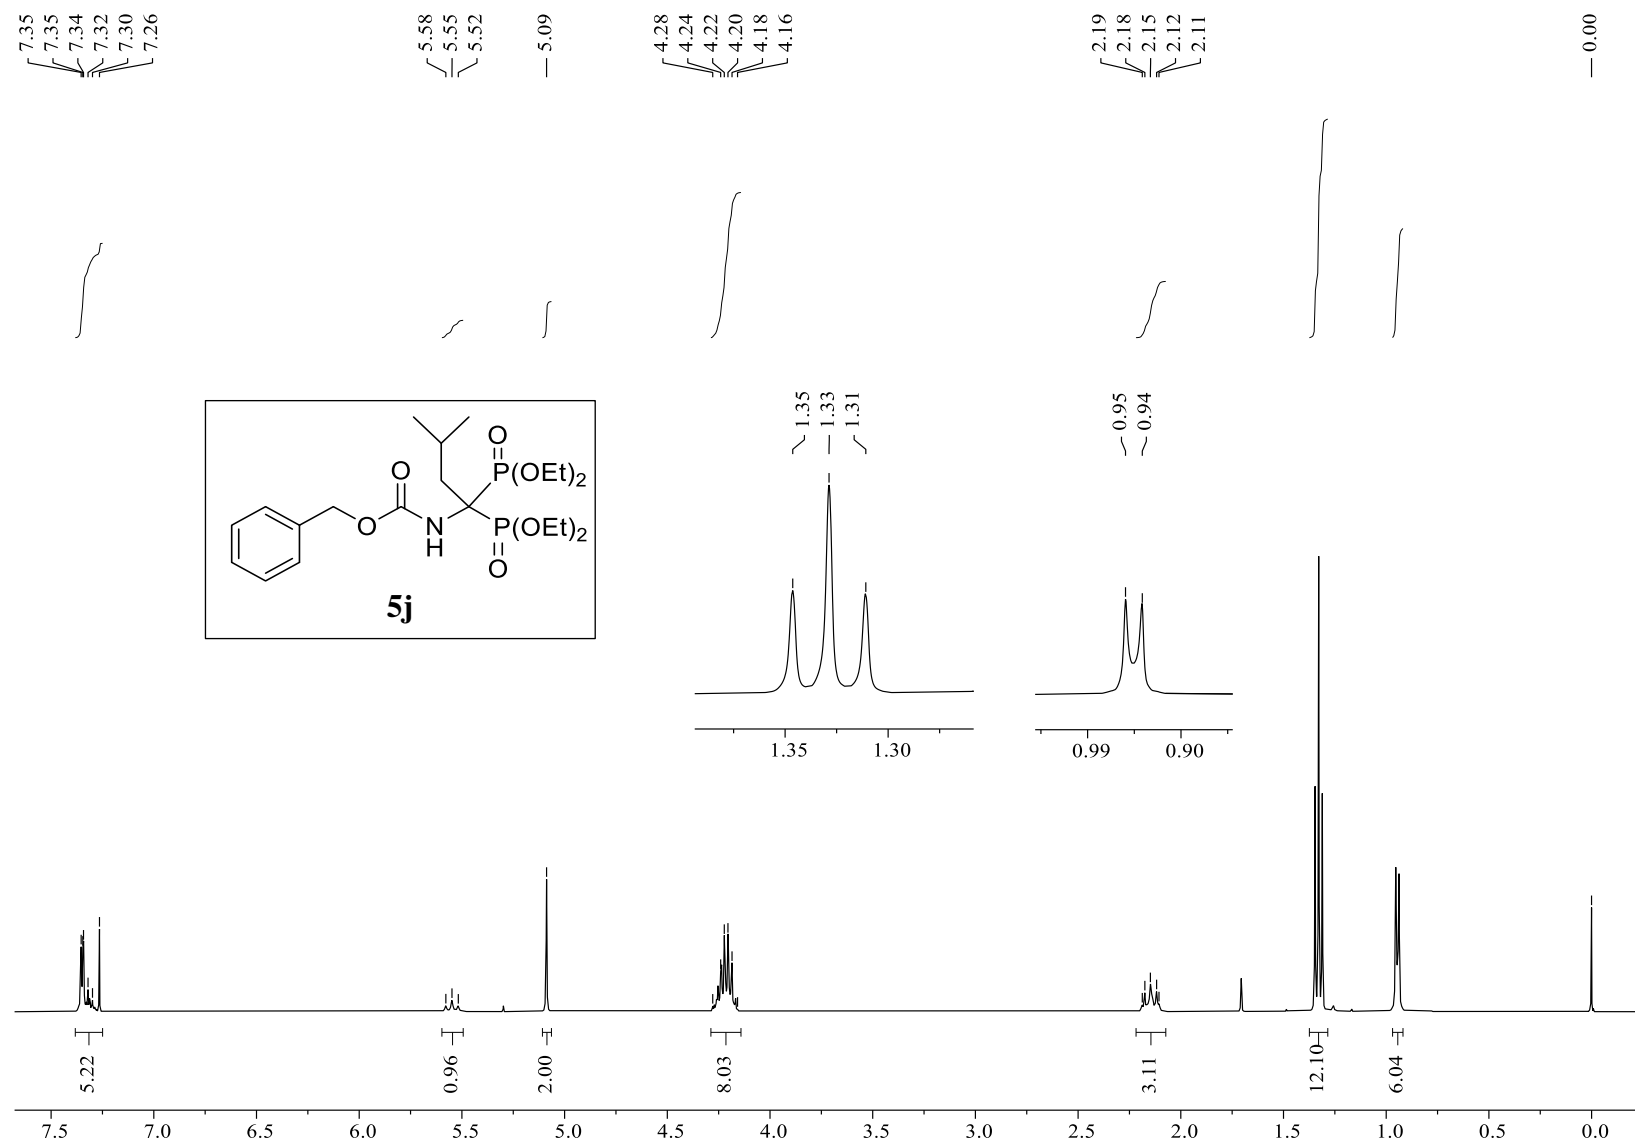

<sup>1</sup>H NMR spectrum of *tetraethyl 1-(N-benzyloxycarbonylamino)-3-methylbutylene-1,1-bisphosphonate (5j)*; 400 MHz/CDCl<sub>3</sub>/TMS; δ (ppm).

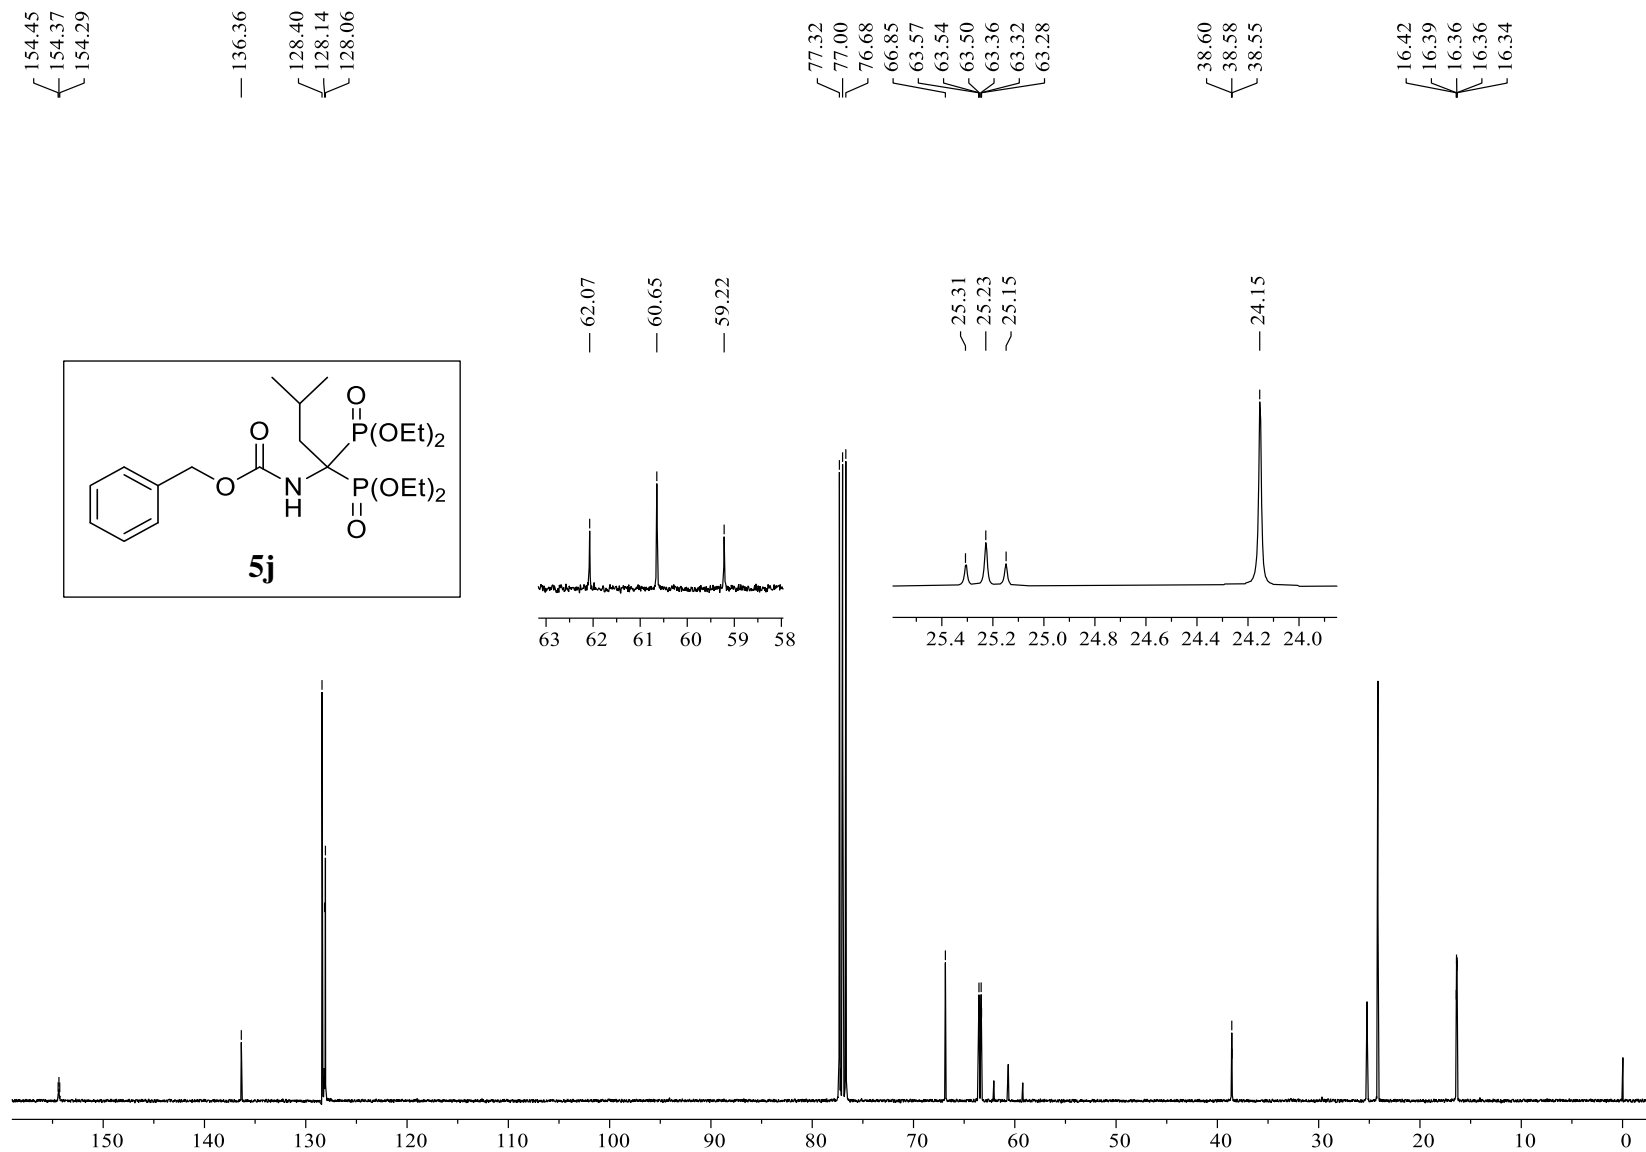

$^{13}\text{C}$  NMR spectrum of tetraethyl 1-(*N*-benzyloxycarbonylamino)-3-methylbutylene-1,1-bisphosphonate (**5j**); 100 MHz/CDCl<sub>3</sub>/TMS;  $\delta$  (ppm).

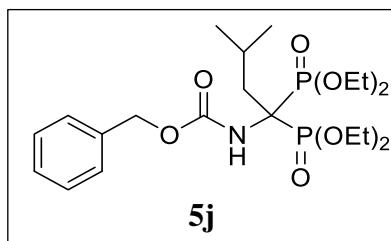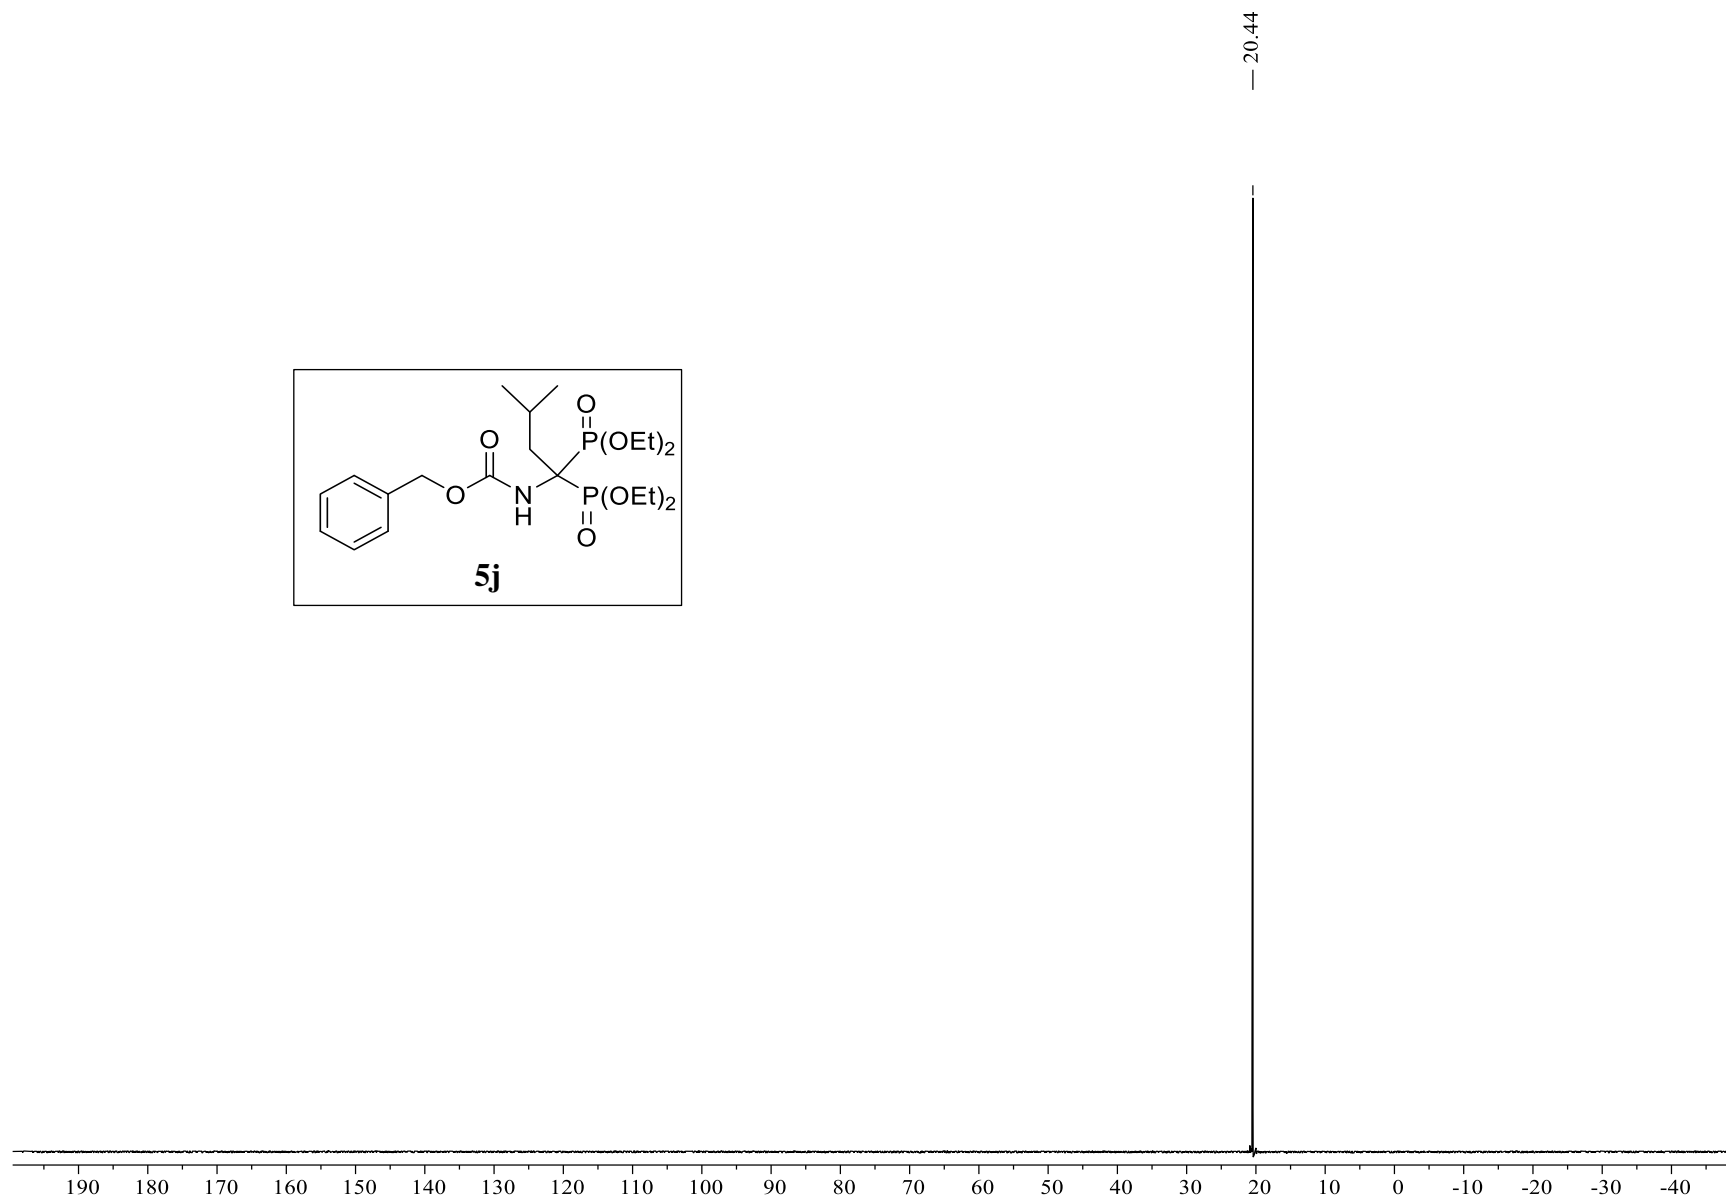

$^{31}\text{P}$  NMR spectrum of *tetraethyl 1-(N-benzyloxycarbonylamino)-3-methylbutylene-1,1-bisphosphonate (5j)*; 162 MHz/ $\text{CDCl}_3/\text{TMS}$ ;  $\delta$  (ppm).



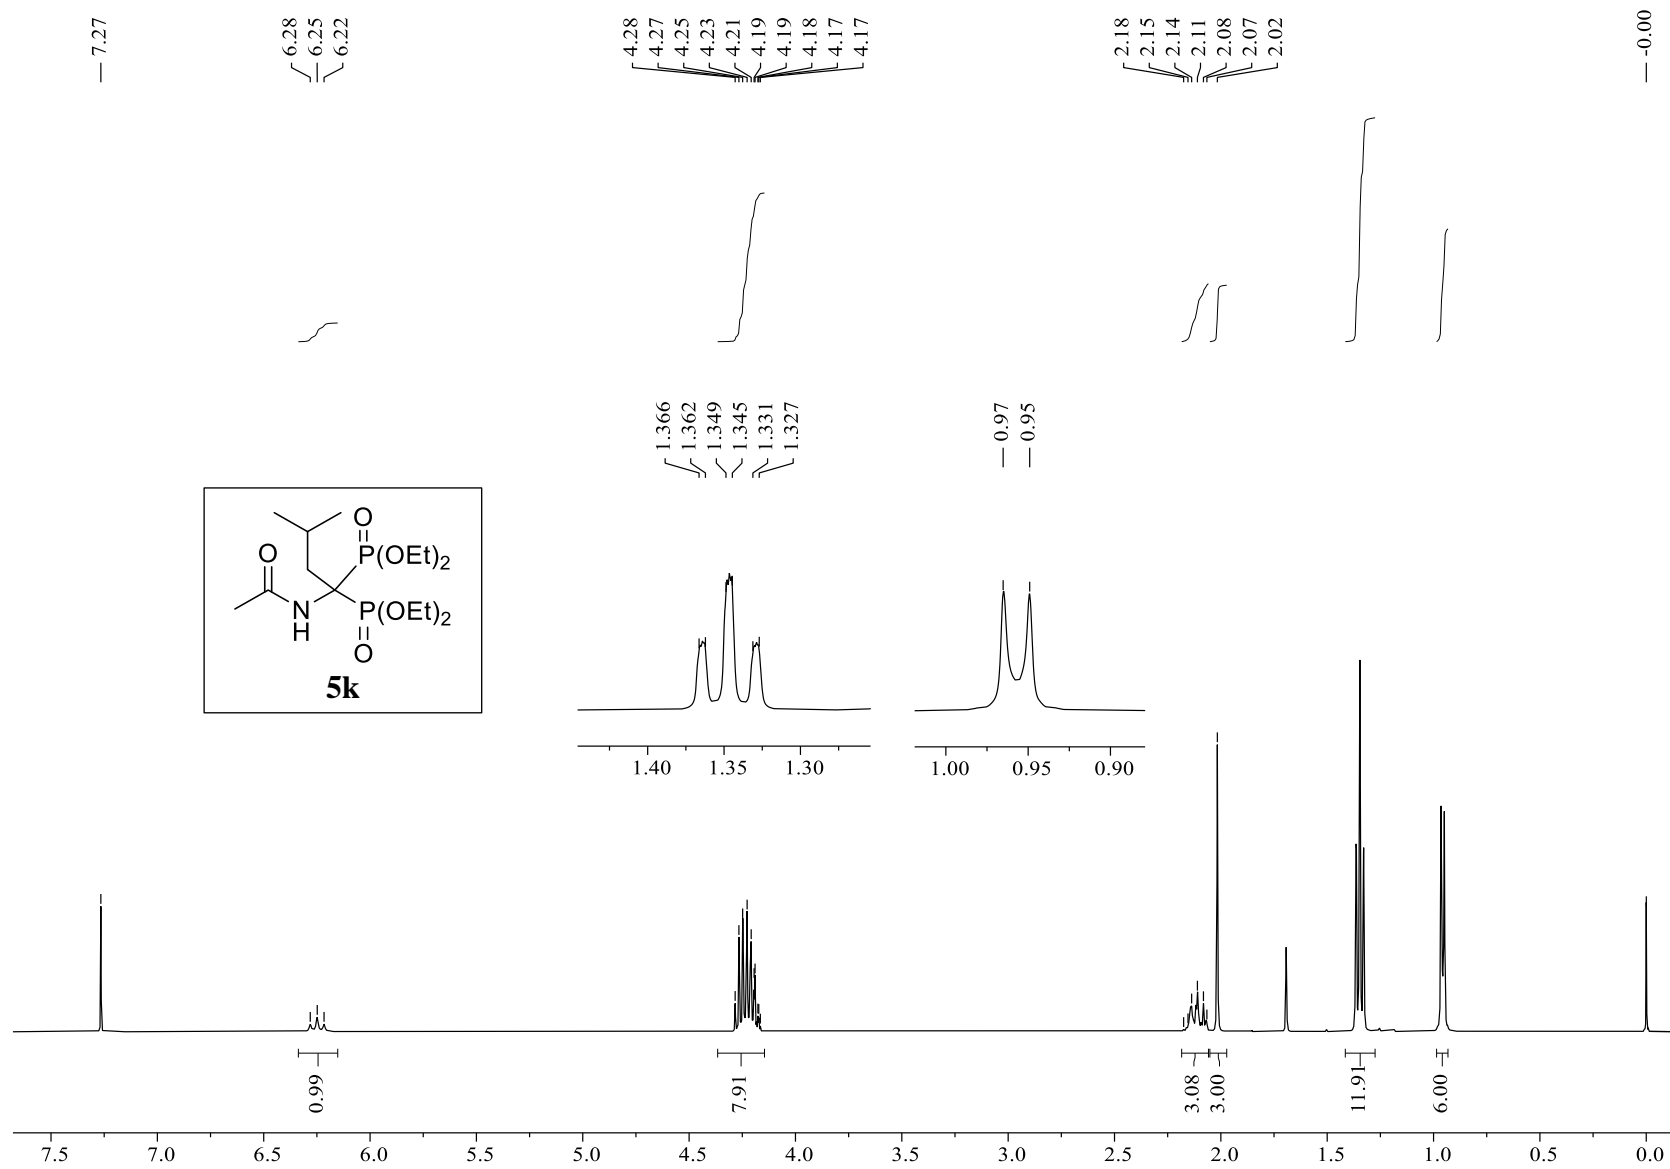

<sup>1</sup>H NMR spectrum of *tetraethyl 1-(N-acetylamino)-3-methylbutylene-1,1-bisphosphonate (5k)*; 400 MHz/CDCl<sub>3</sub>/TMS; δ (ppm).

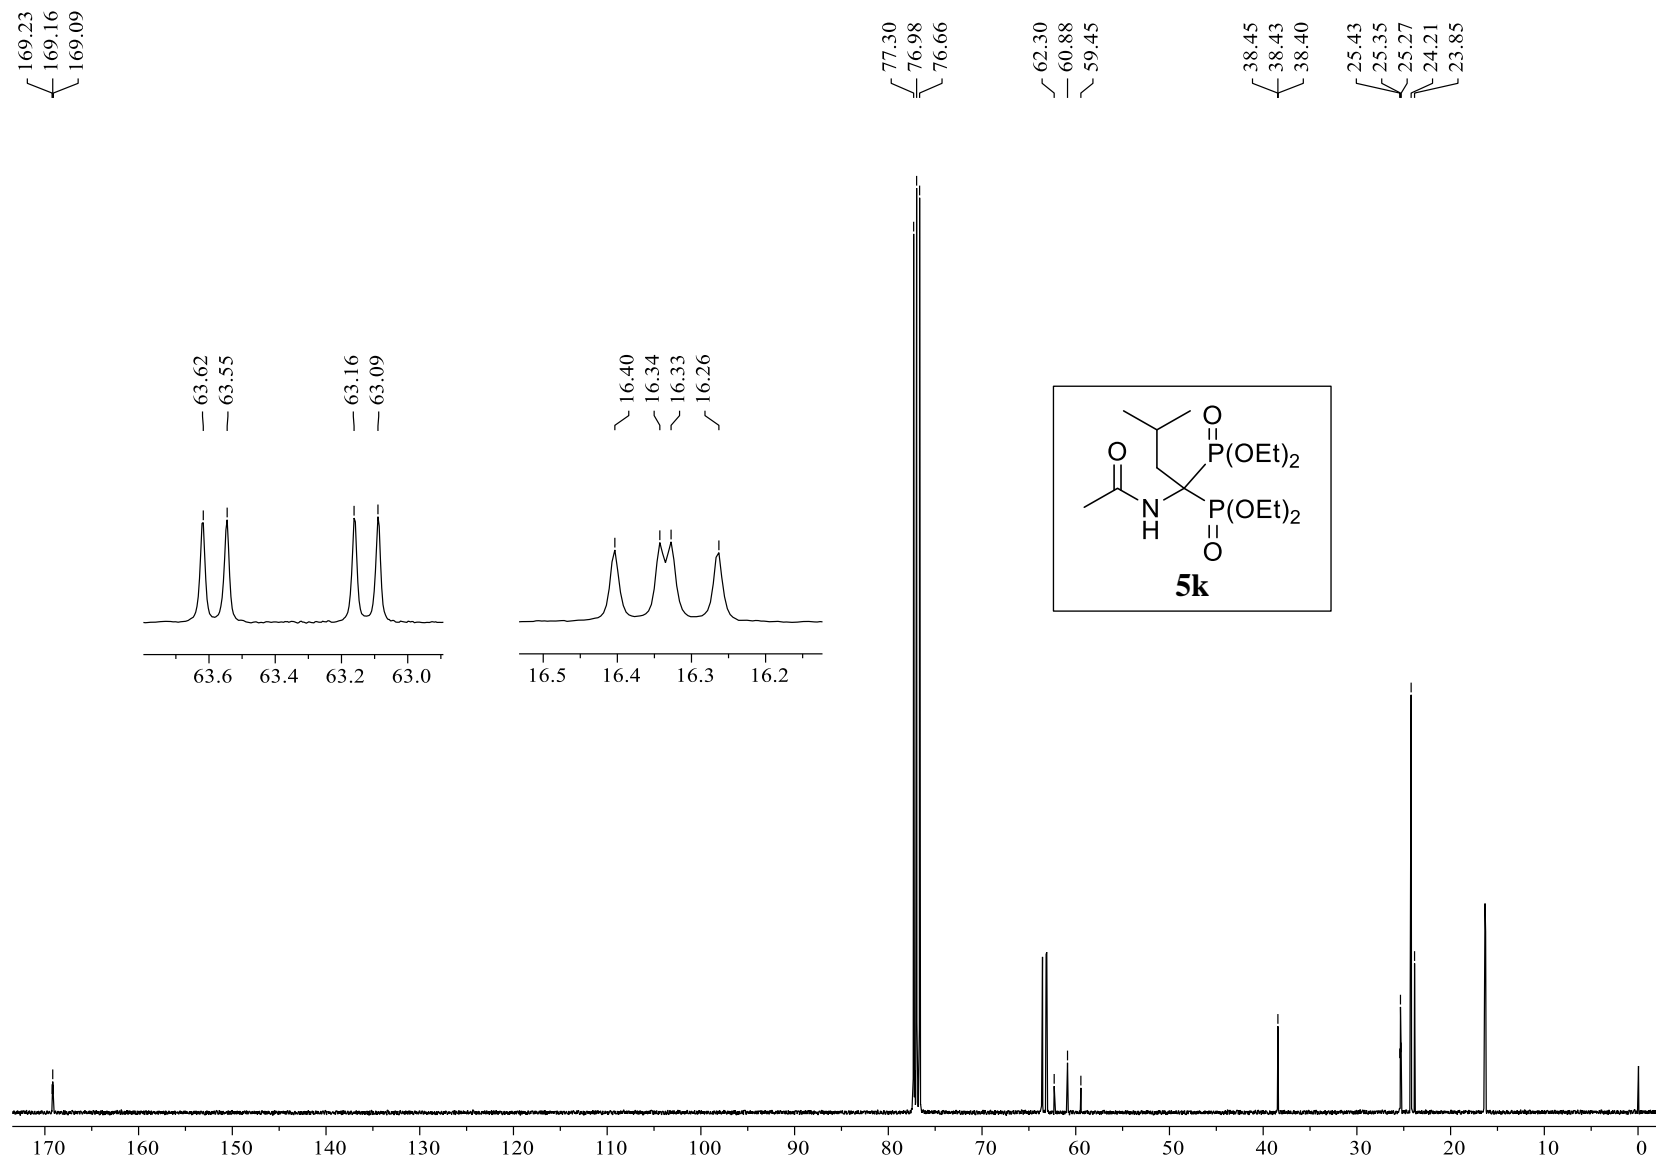

<sup>13</sup>C NMR spectrum of tetraethyl 1-(*N*-acetylamino)-3-methylbutylene-1,1-bisphosphonate (**5k**); 100 MHz/CDCl<sub>3</sub>/TMS; δ (ppm).

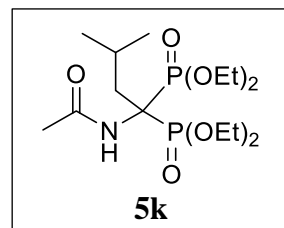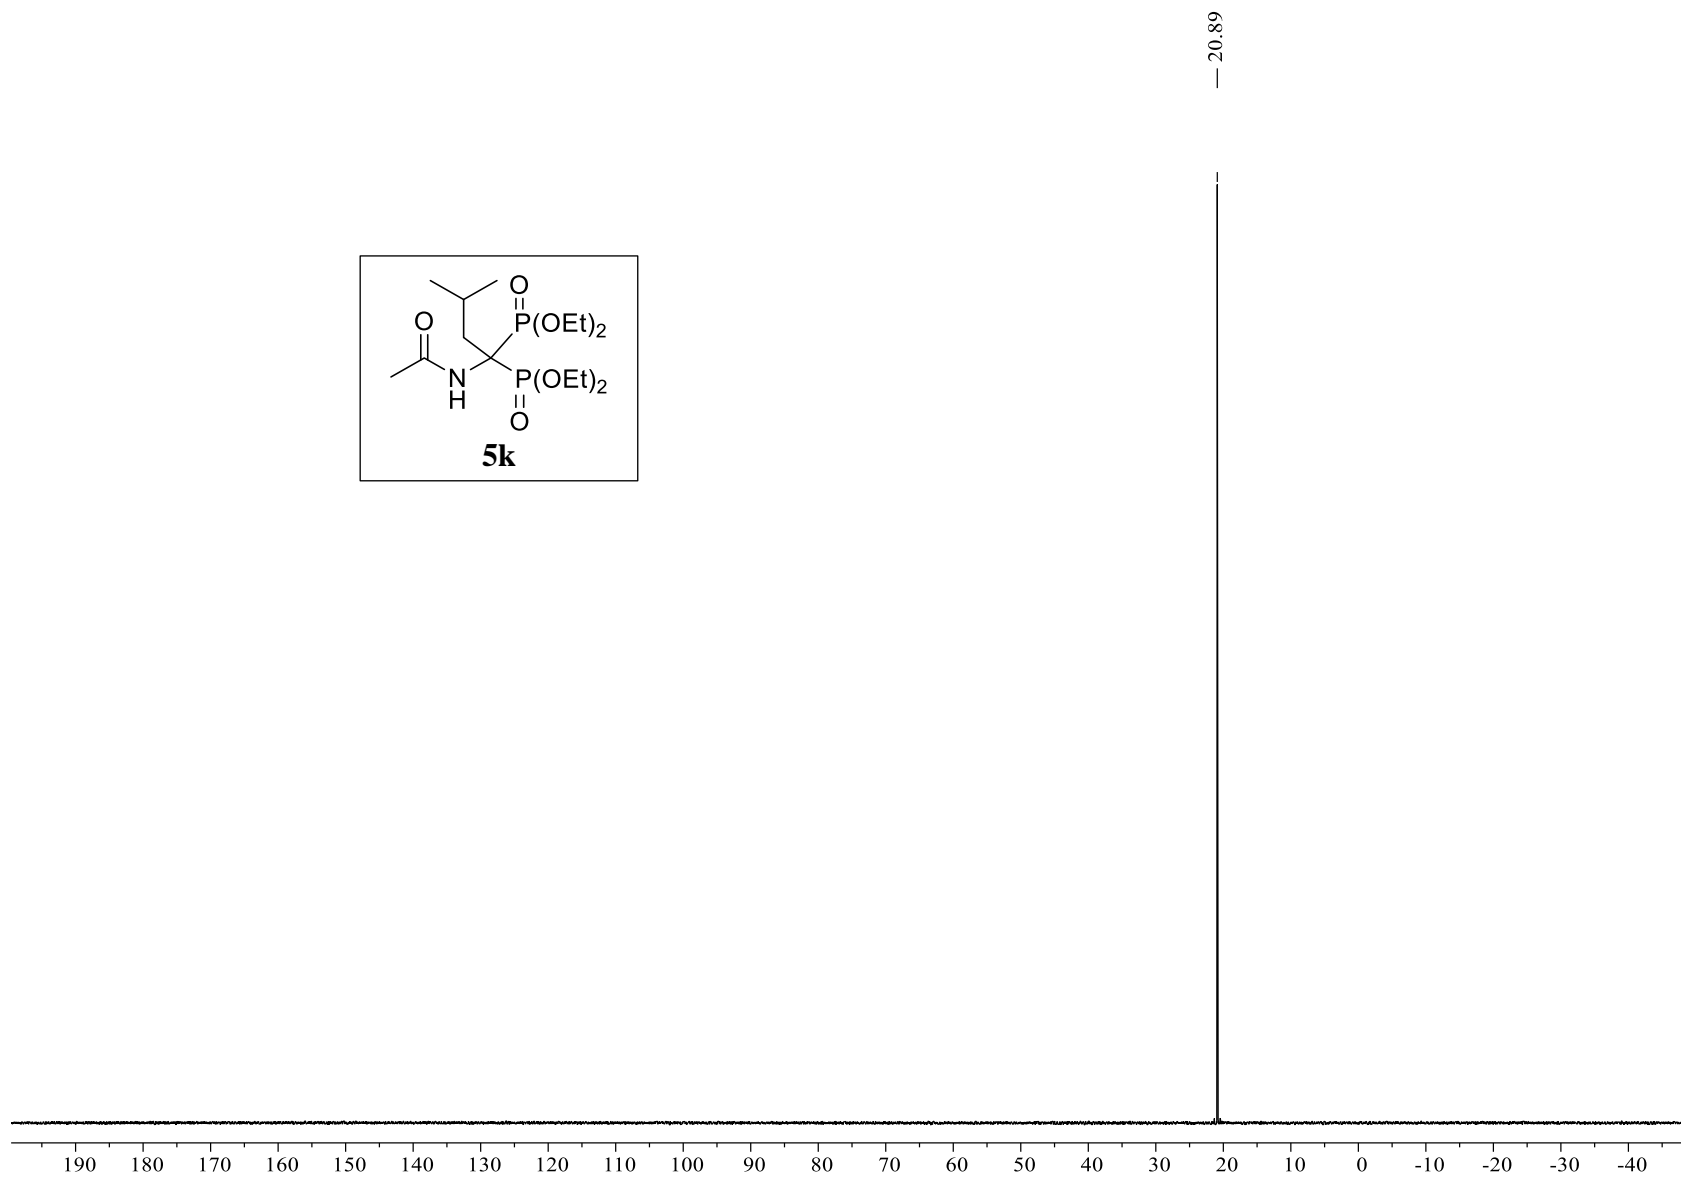

$^{31}\text{P}$  NMR spectrum of *tetraethyl 1-(N-acetylamino)-3-methylbutylene-1,1-bisphosphonate (5k)*; 162 MHz/ $\text{CDCl}_3/\text{TMS}$ ;  $\delta$  (ppm).

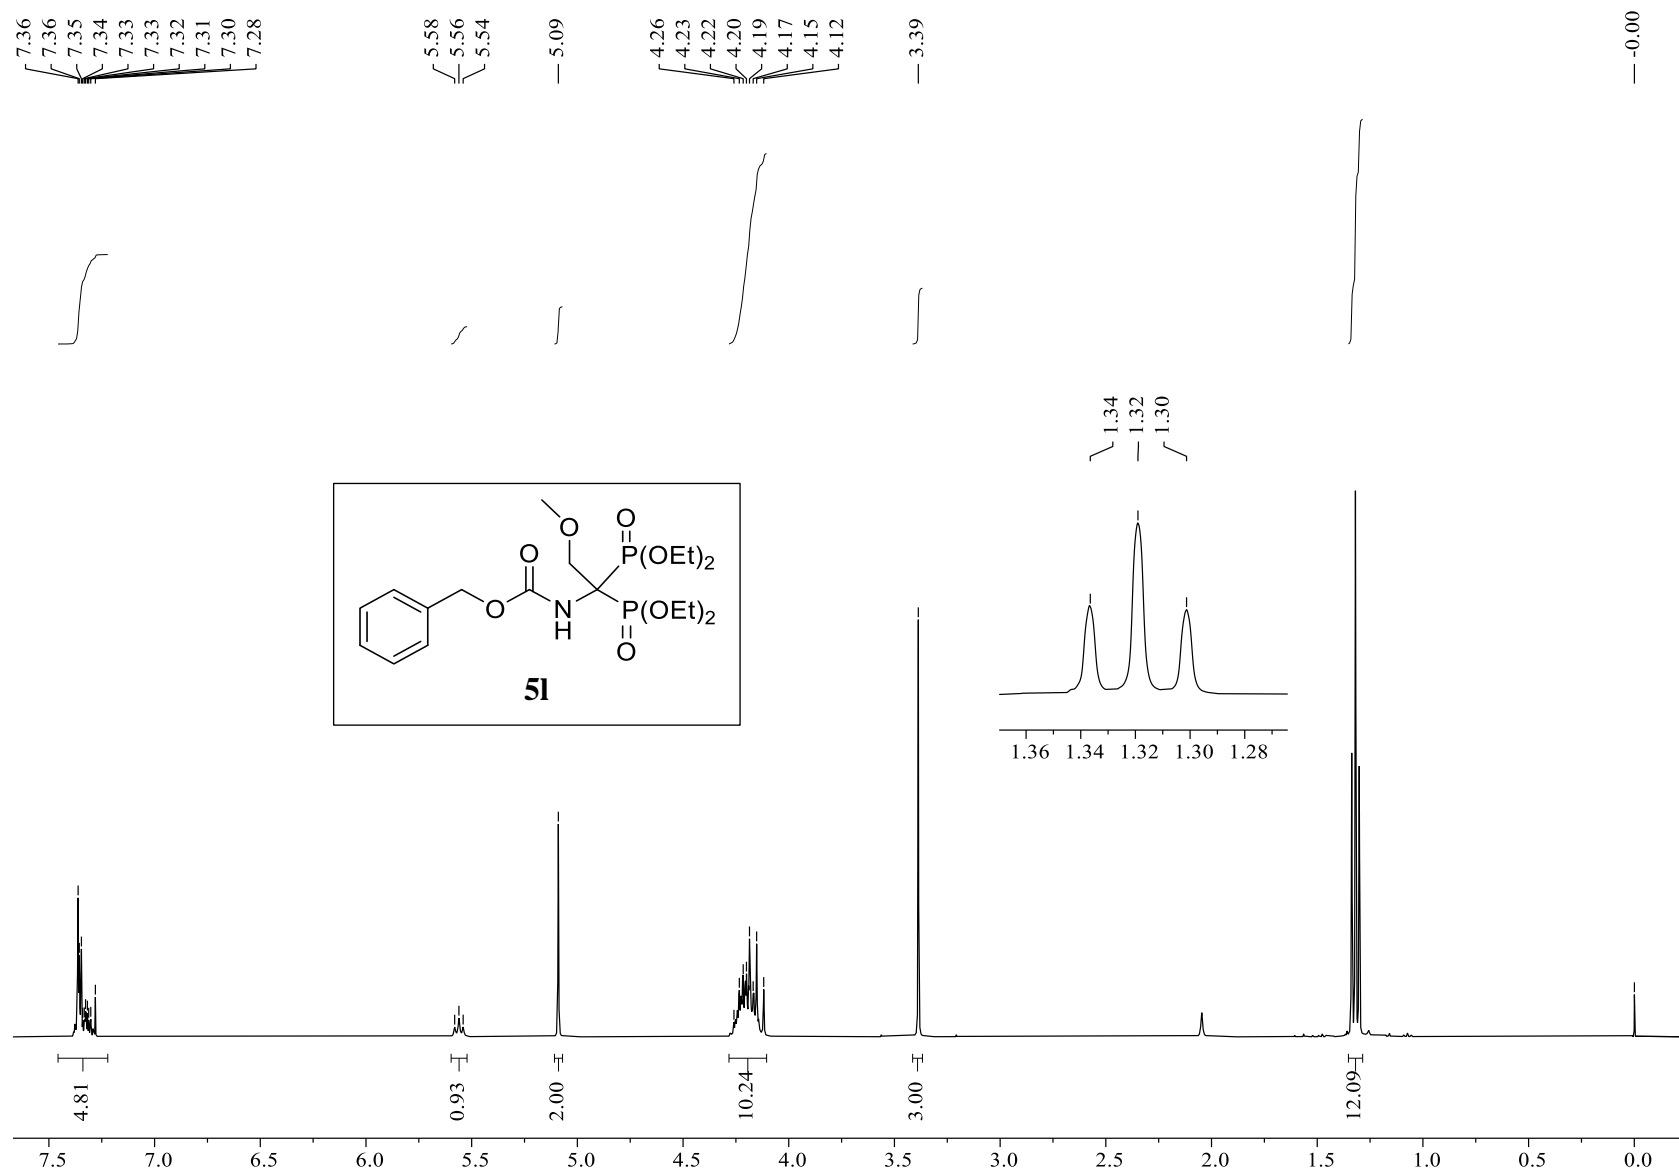

<sup>1</sup>H NMR spectrum of *tetraethyl 1-(N-benzyloxycarbonylamino)-2-methoxyethylene-1,1-bisphosphonate (5l)*; 400 MHz/CDCl<sub>3</sub>/TMS; δ (ppm).

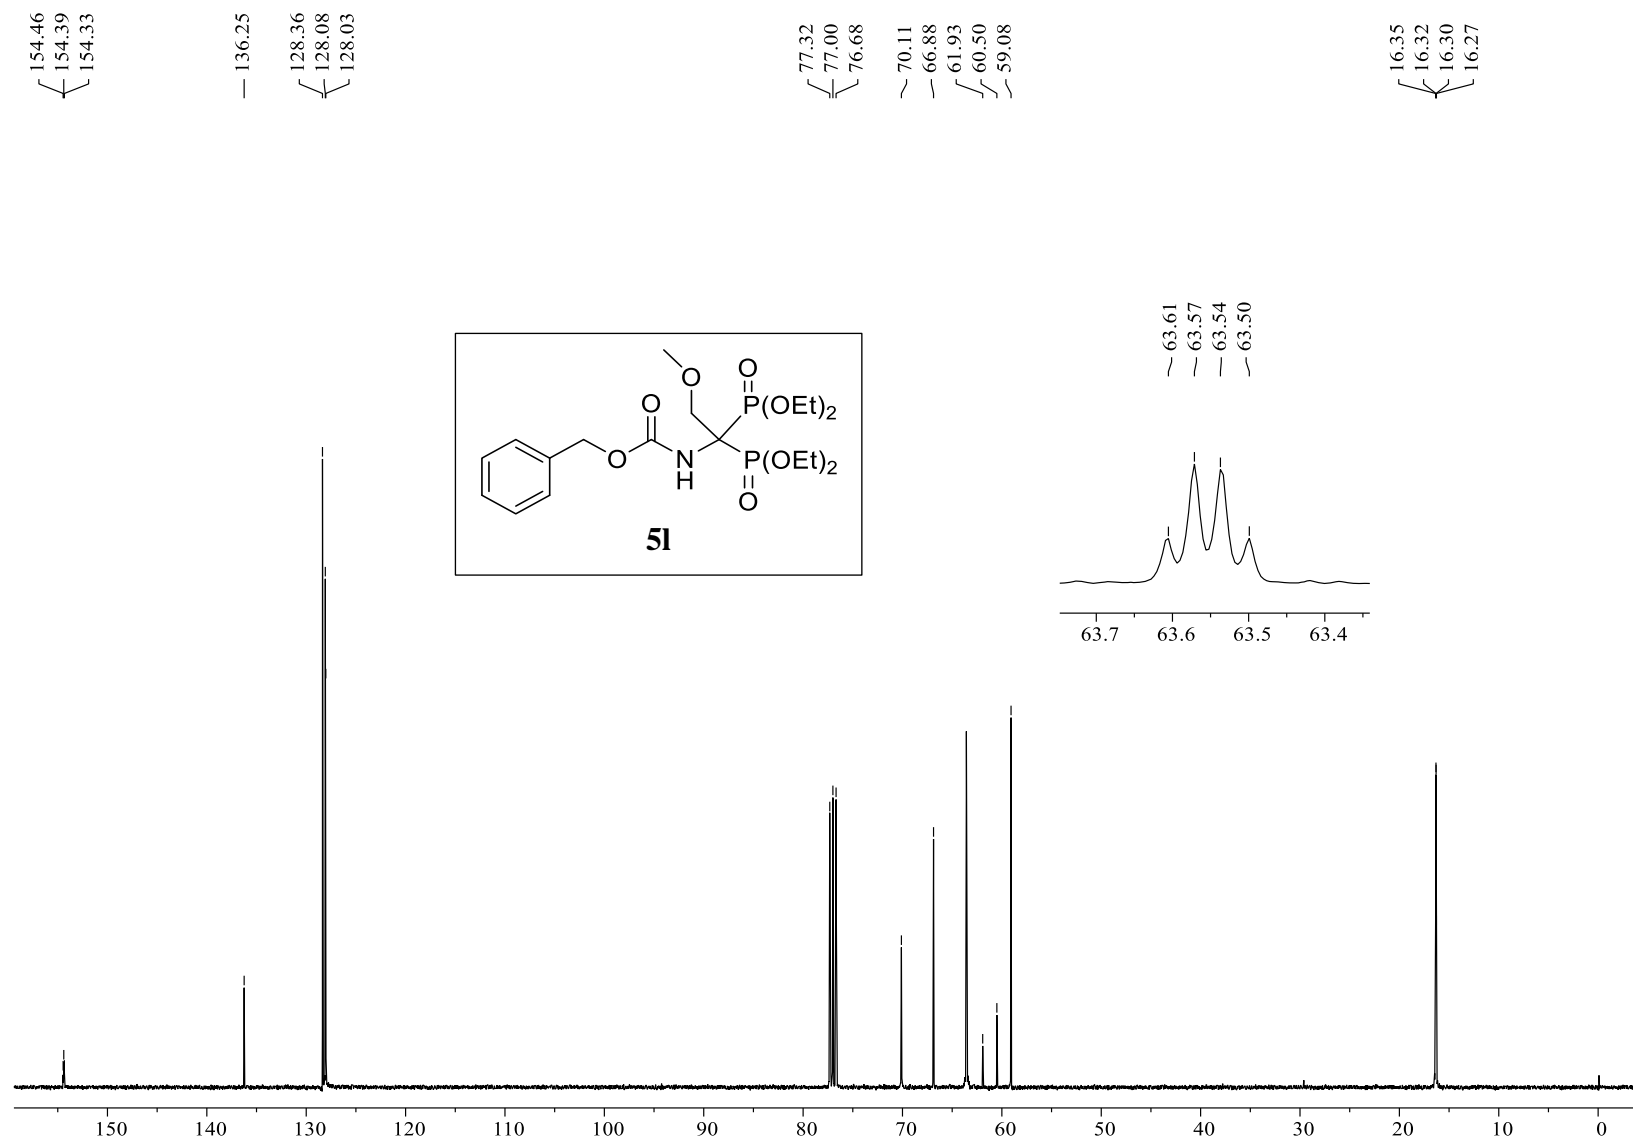

<sup>13</sup>C NMR spectrum of *tetraethyl 1-(N-benzoyloxycarbonylamino)-2-methoxyethylene-1,1-bisphosphonate (5l)*; 100 MHz/CDCl<sub>3</sub>/TMS;  $\delta$  (ppm).

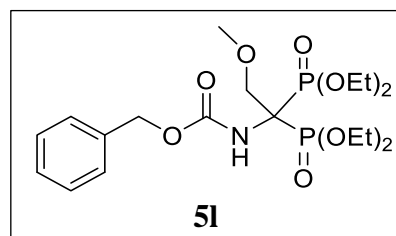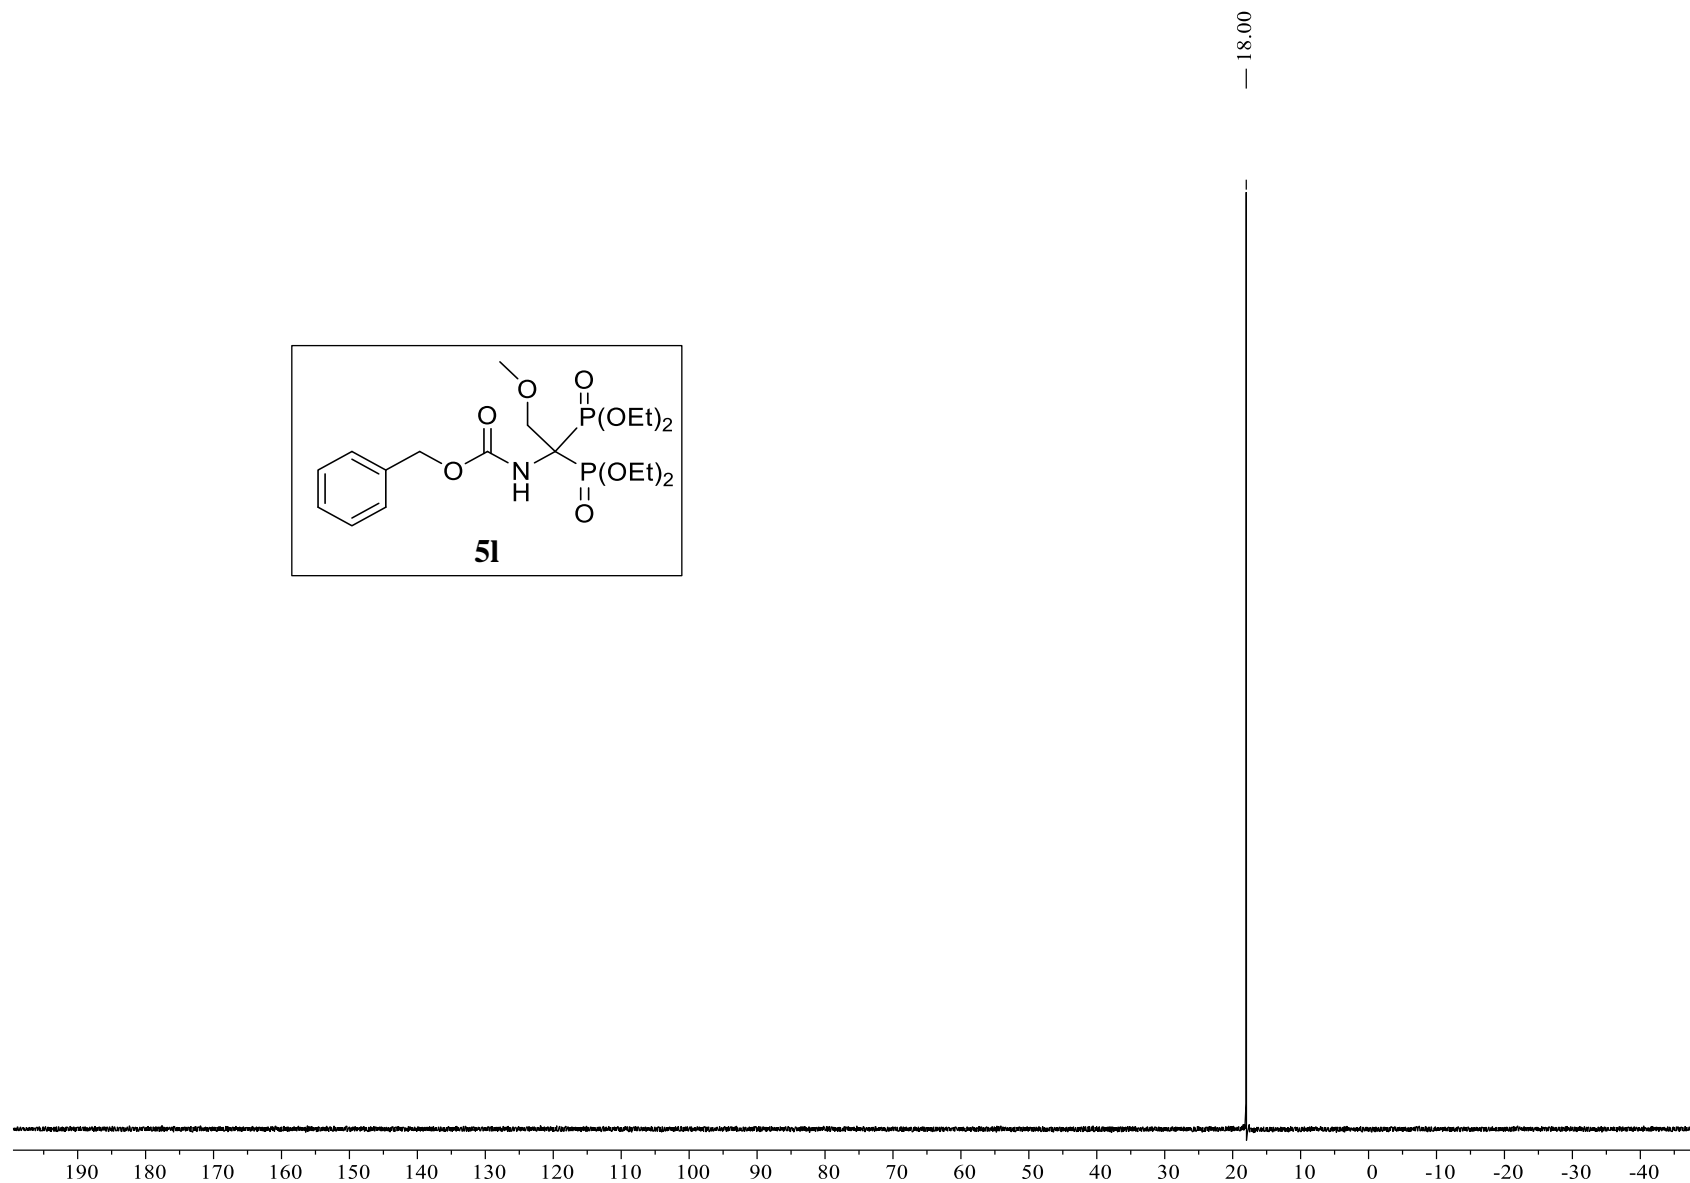

$^{31}\text{P}$  NMR spectrum of *tetraethyl 1-(N-benzoyloxycarbonylamino)-2-methoxyethylene-1,1-bisphosphonate (5l)*; 162 MHz/ $\text{CDCl}_3$ /TMS;  $\delta$  (ppm).

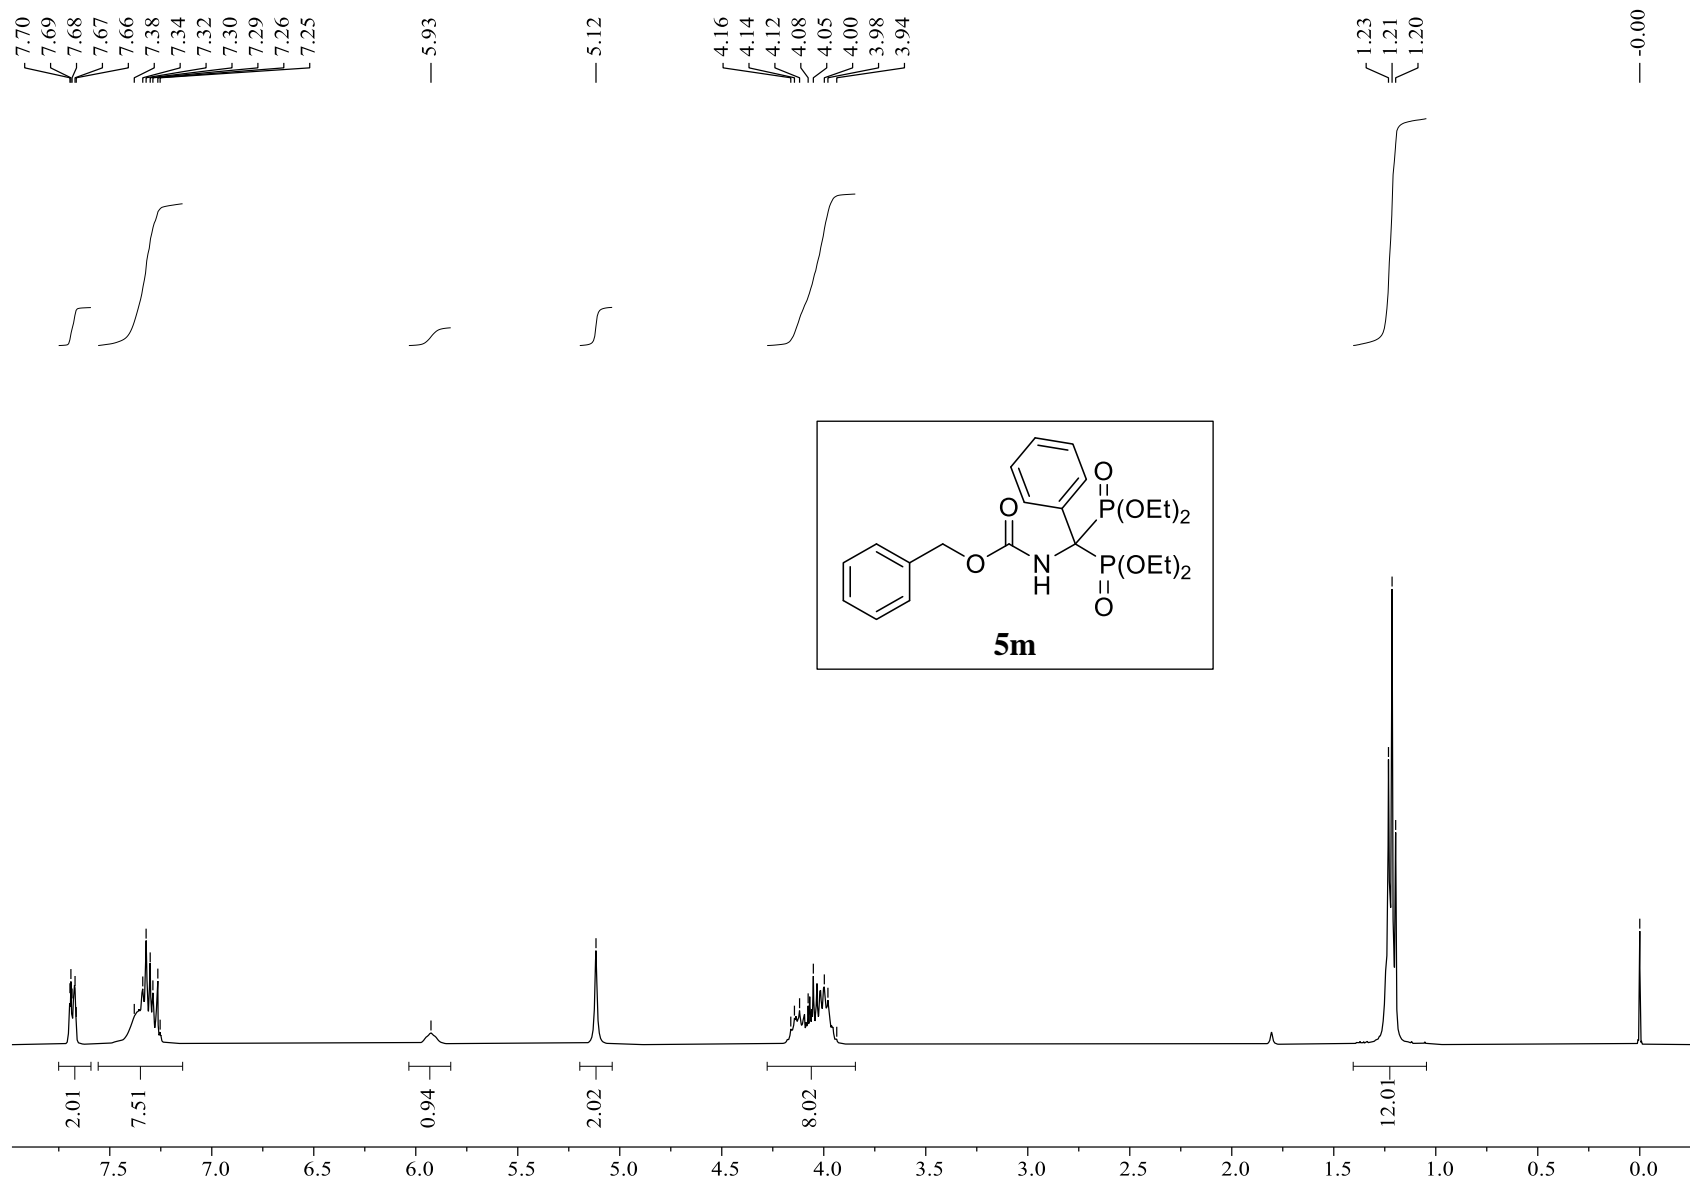

<sup>1</sup>H NMR spectrum of *tetraethyl 1-(N-benzyloxycarbonylamino)phenylmethylene-1,1-bisphosphonate (5m)*; 400 MHz/<sup>13</sup>CDCl<sub>3</sub>/TMS; δ (ppm).

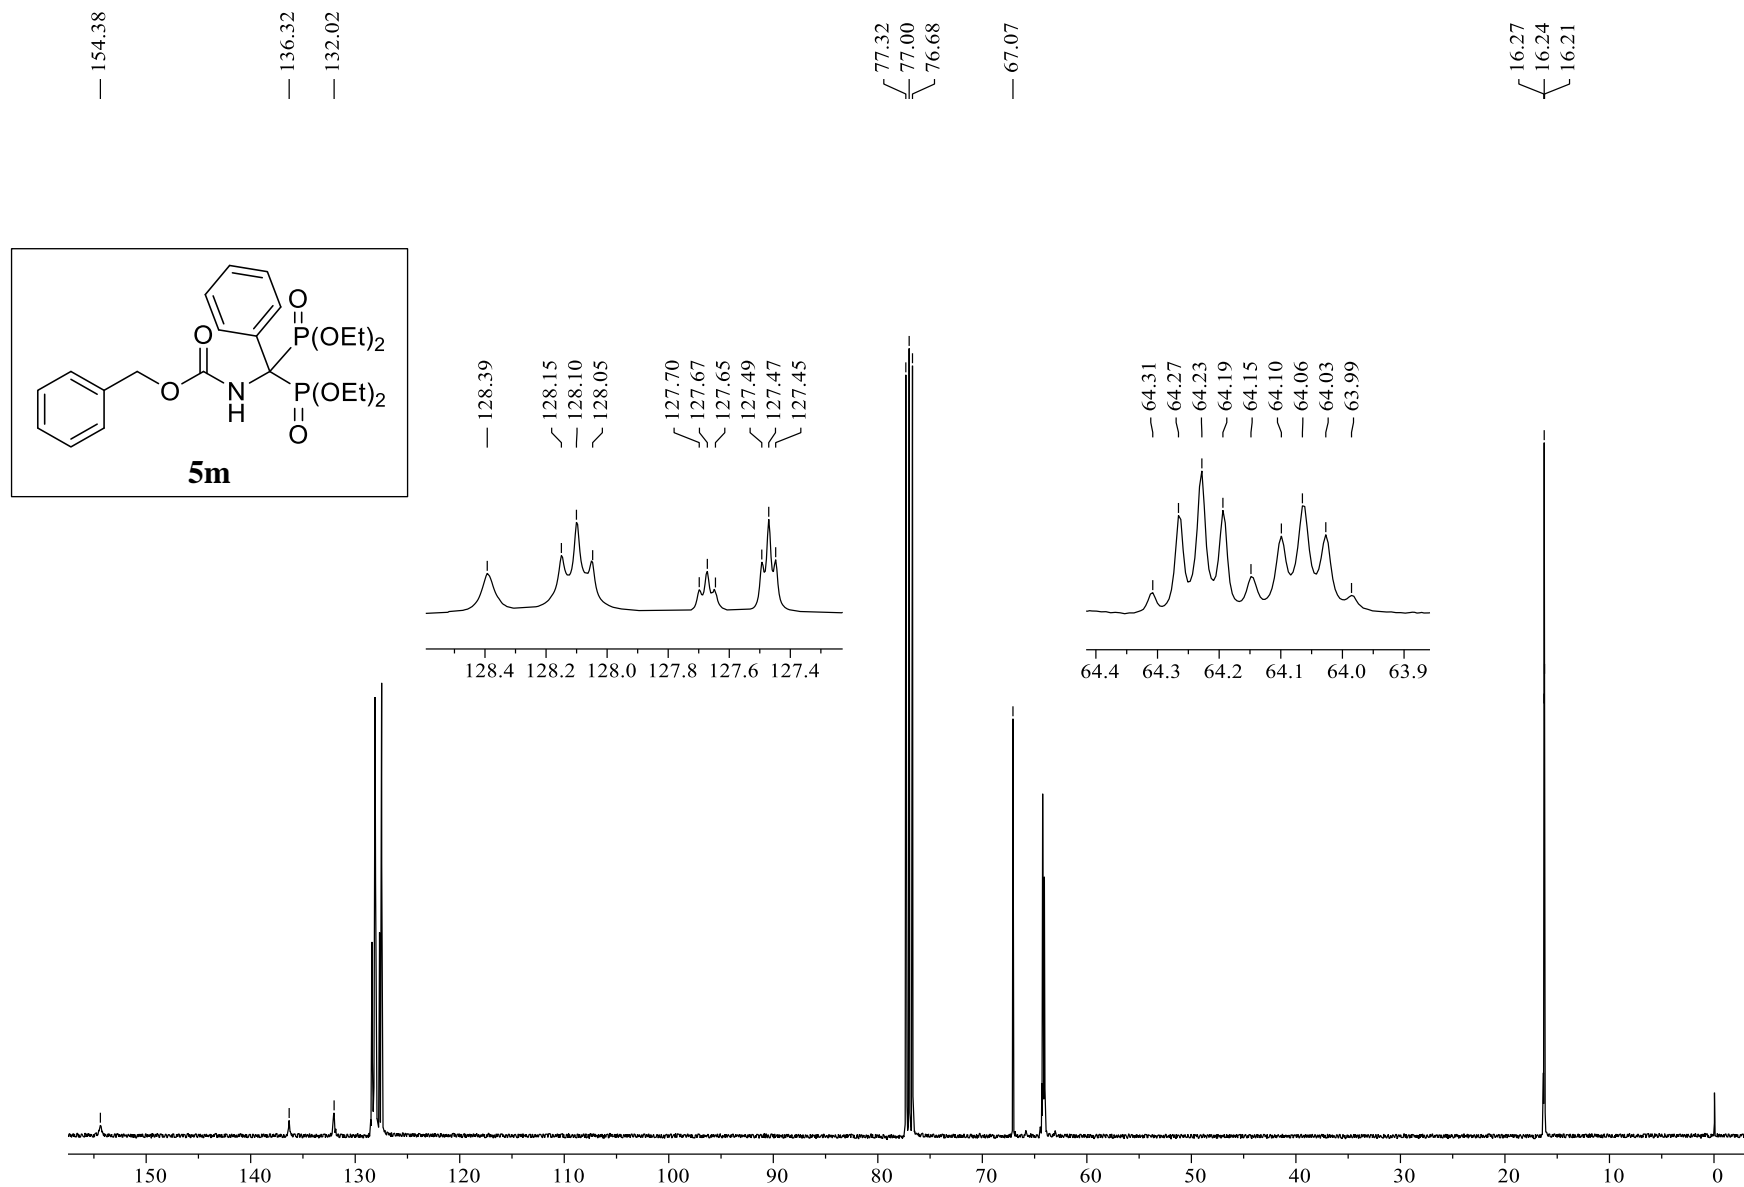

<sup>13</sup>C NMR spectrum of *tetraethyl 1-(N-benzyloxycarbonylamino)phenylmethylene-1,1-bisphosphonate* (**5m**); 100 MHz/CDCl<sub>3</sub>/TMS; δ (ppm).



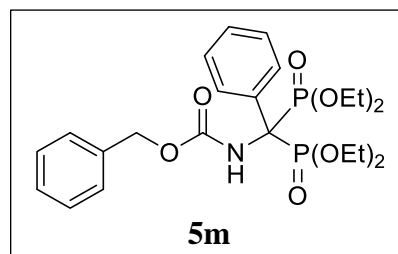

— 17.13

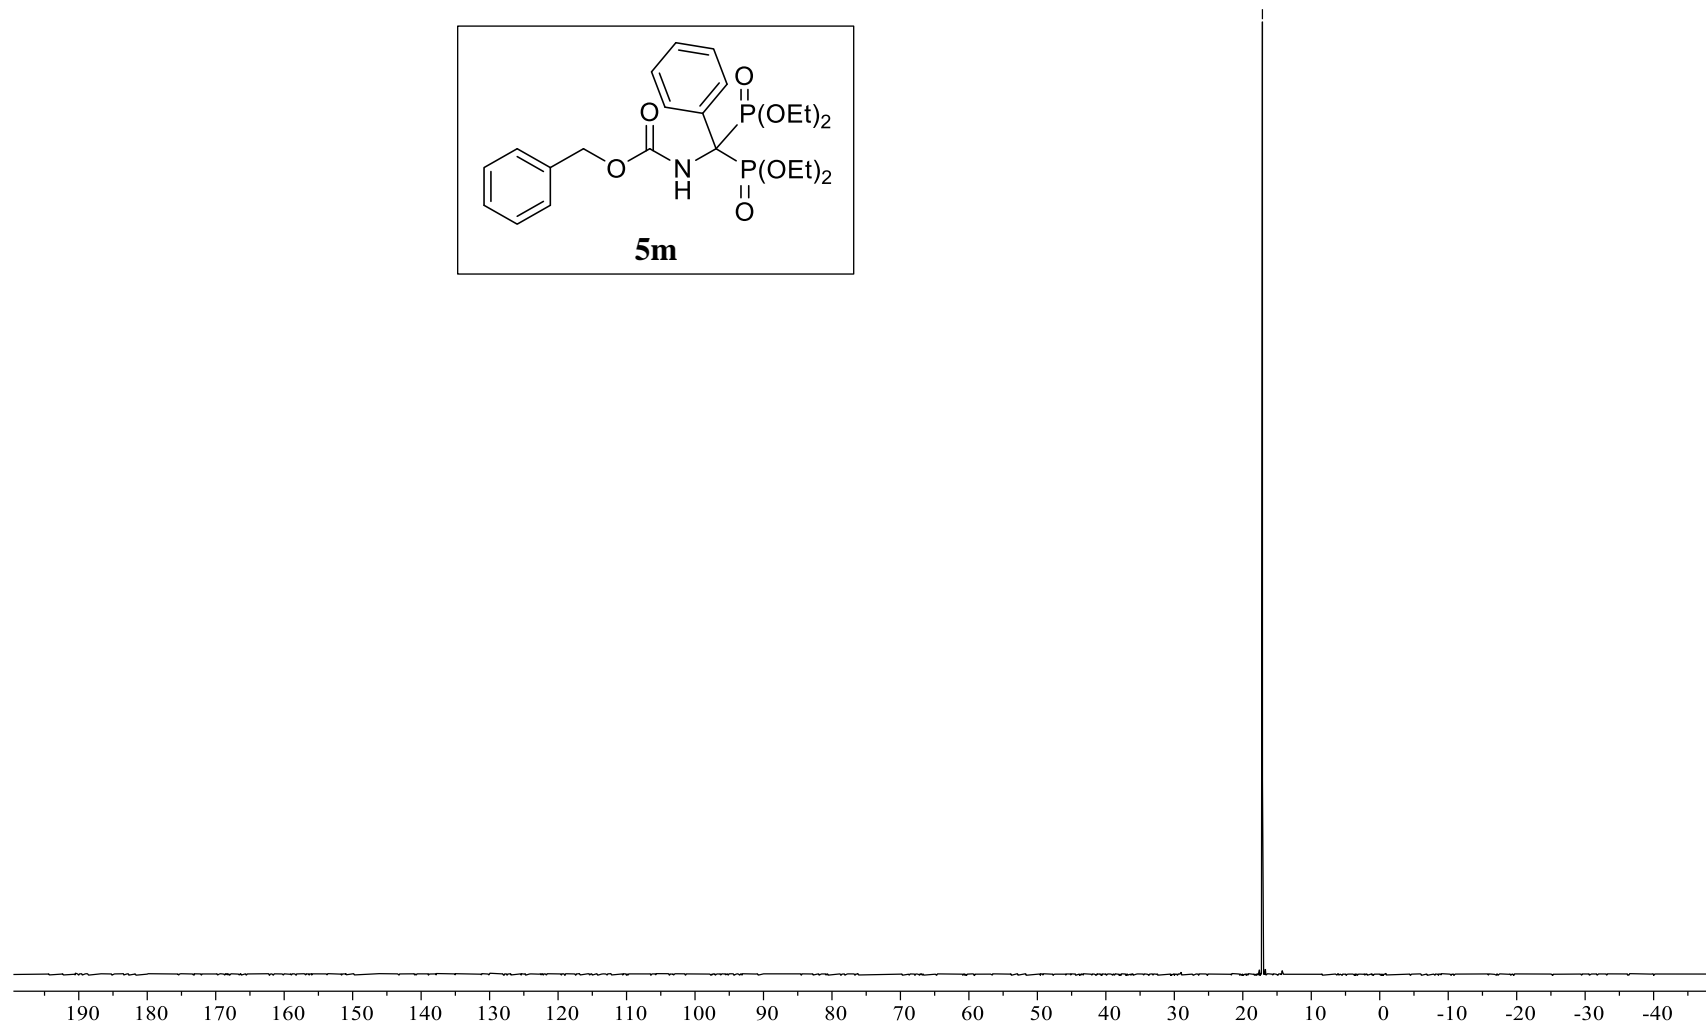

$^{31}\text{P}$  NMR spectrum of *tetraethyl 1-(N-benzyloxycarbonylamino)phenylmethylene-1,1-bisphosphonate (5m)*; 162 MHz/ $\text{CDCl}_3/\text{TMS}$ ;  $\delta$  (ppm).

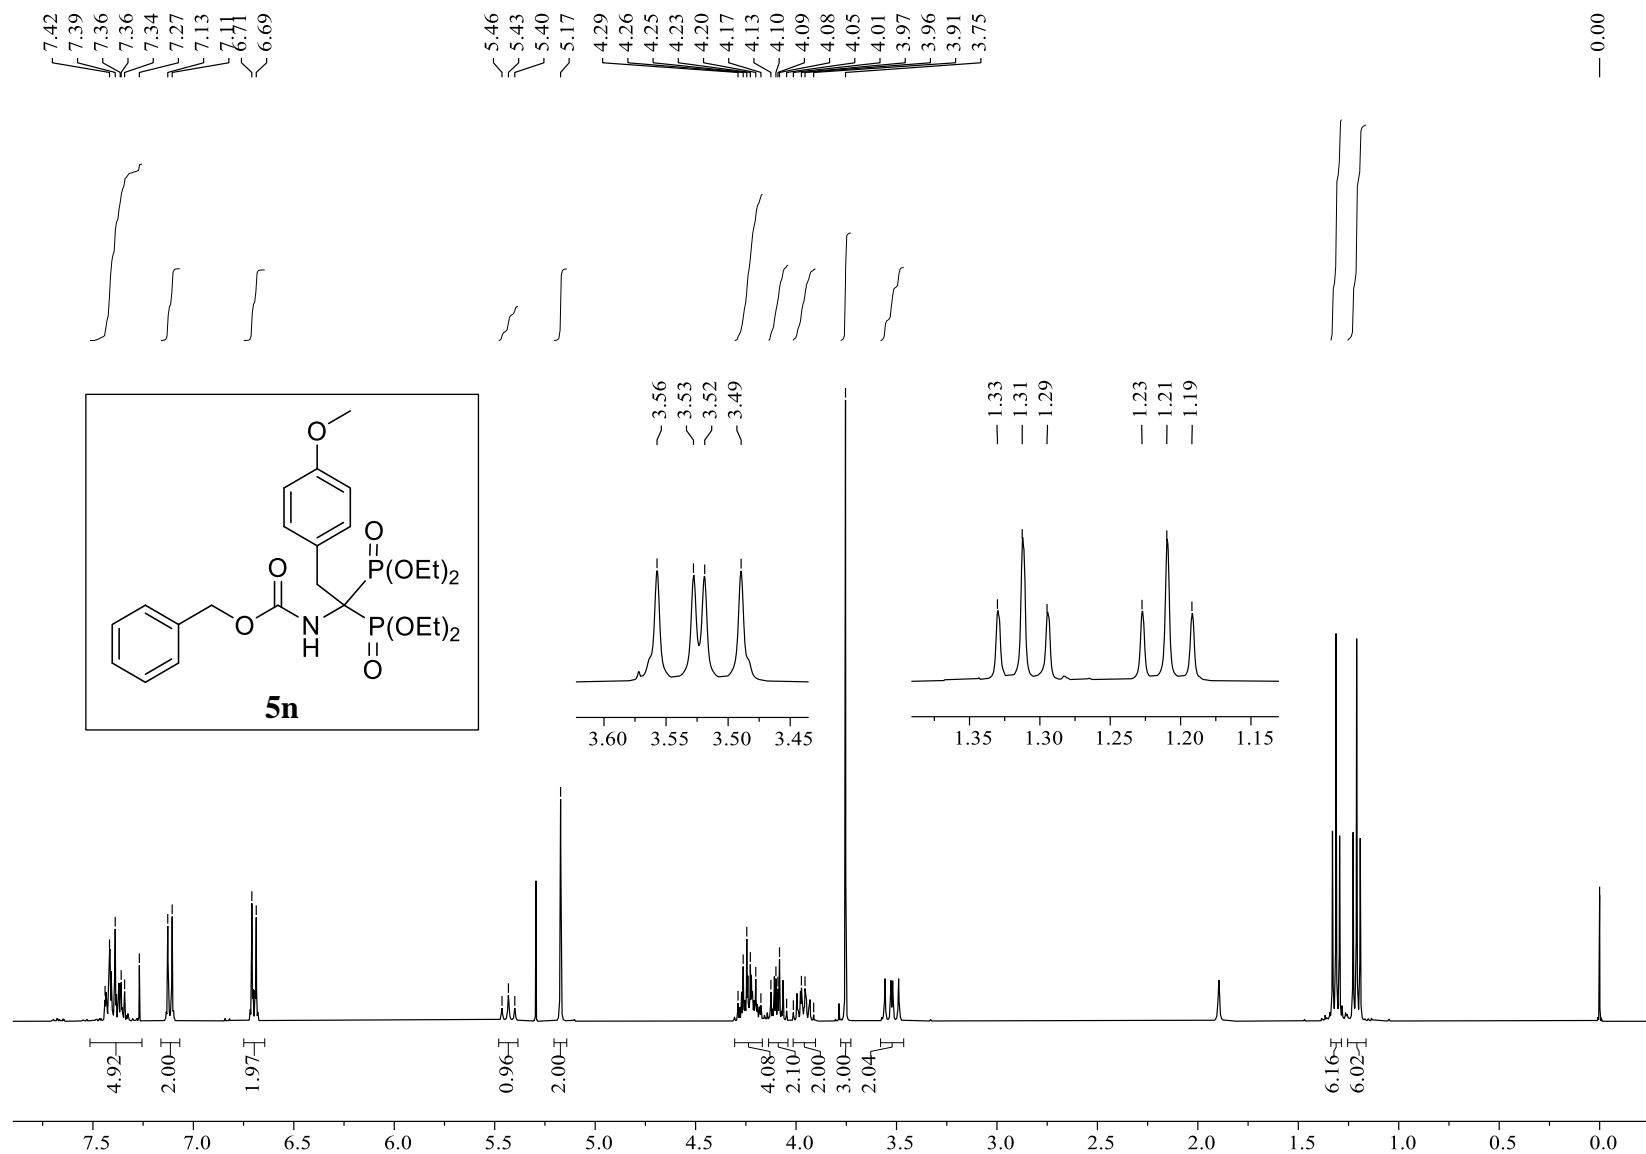

<sup>1</sup>H NMR spectrum of *tetraethyl 1-(N-benzyloxycarbonylamino)-2-(4-methoxyphenyl)ethylene-1,1-bisphosphonate (5n)*; 400 MHz/CDCl<sub>3</sub>/TMS; δ (ppm).

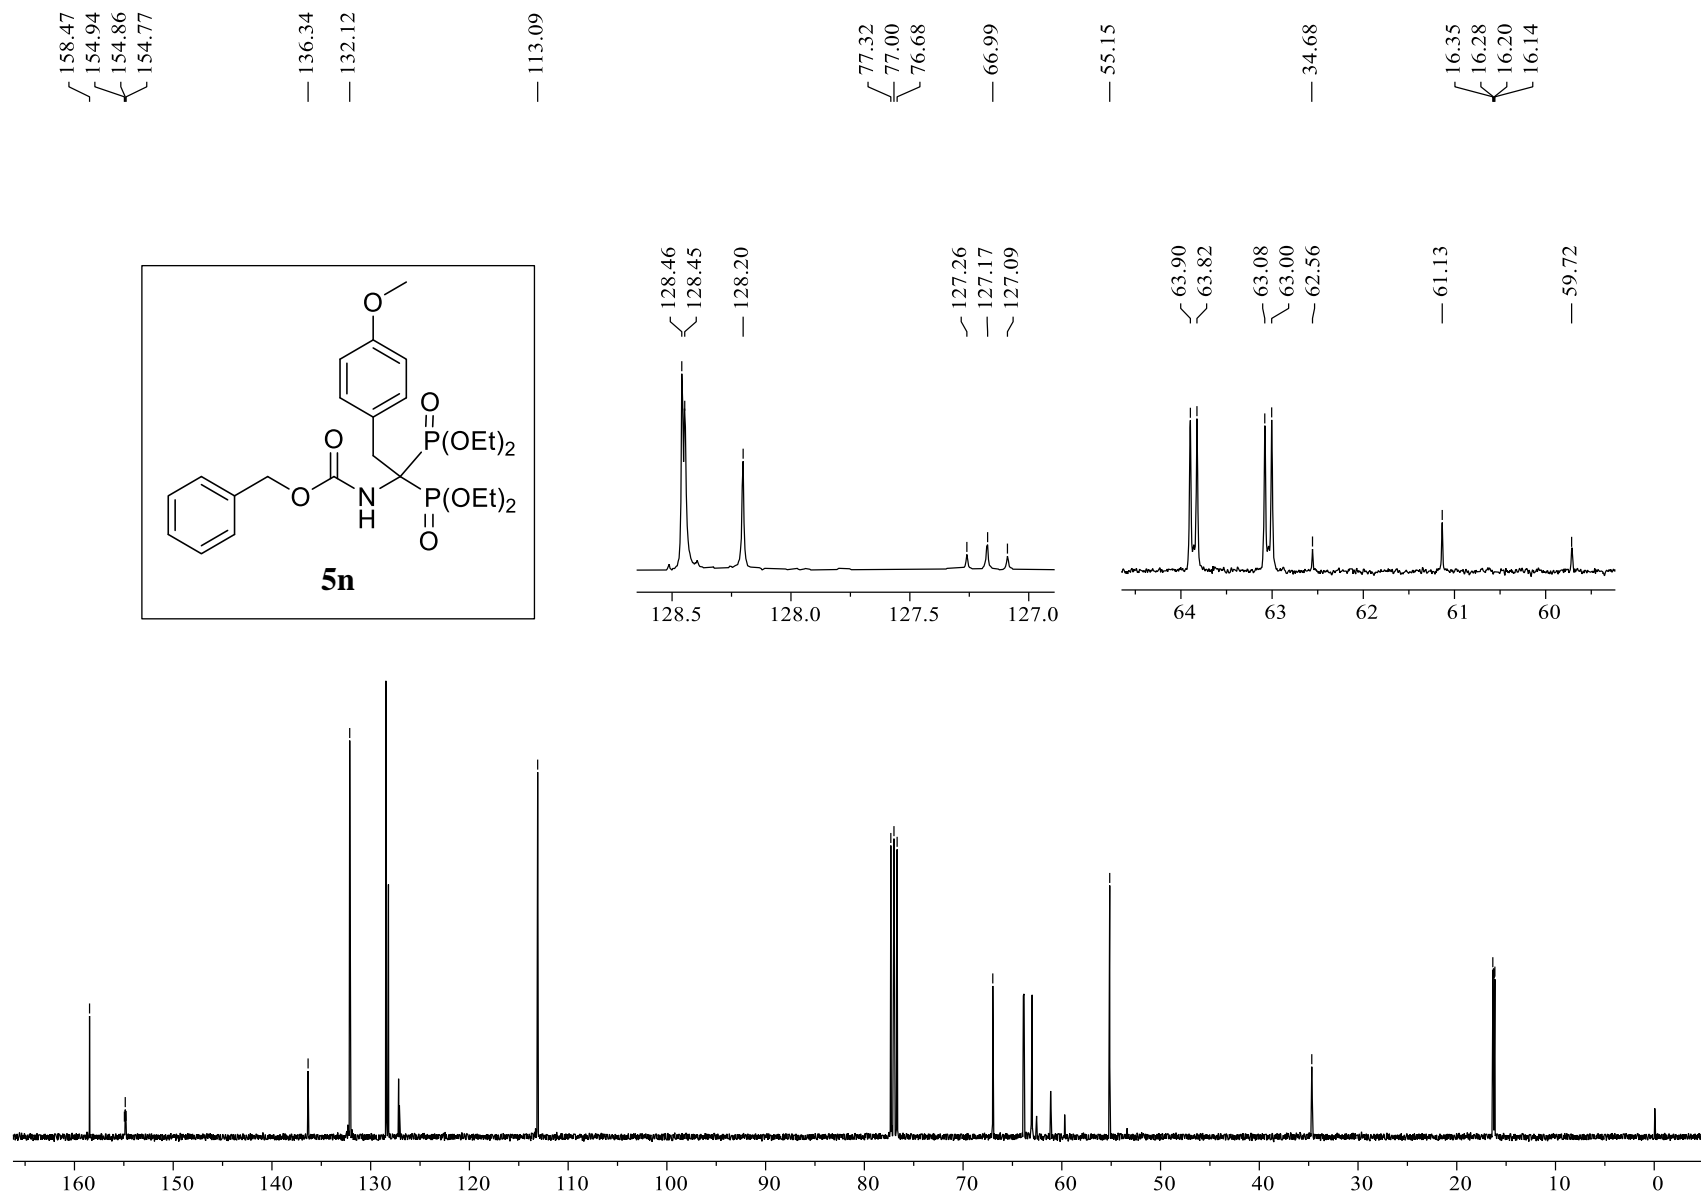

<sup>13</sup>C NMR spectrum of *tetraethyl 1-(N-benzyloxycarbonylamino)-2-(4-methoxyphenyl)ethylene-1,1-bisphosphonate (5n)*; 100 MHz/CDCl<sub>3</sub>/TMS; δ (ppm).

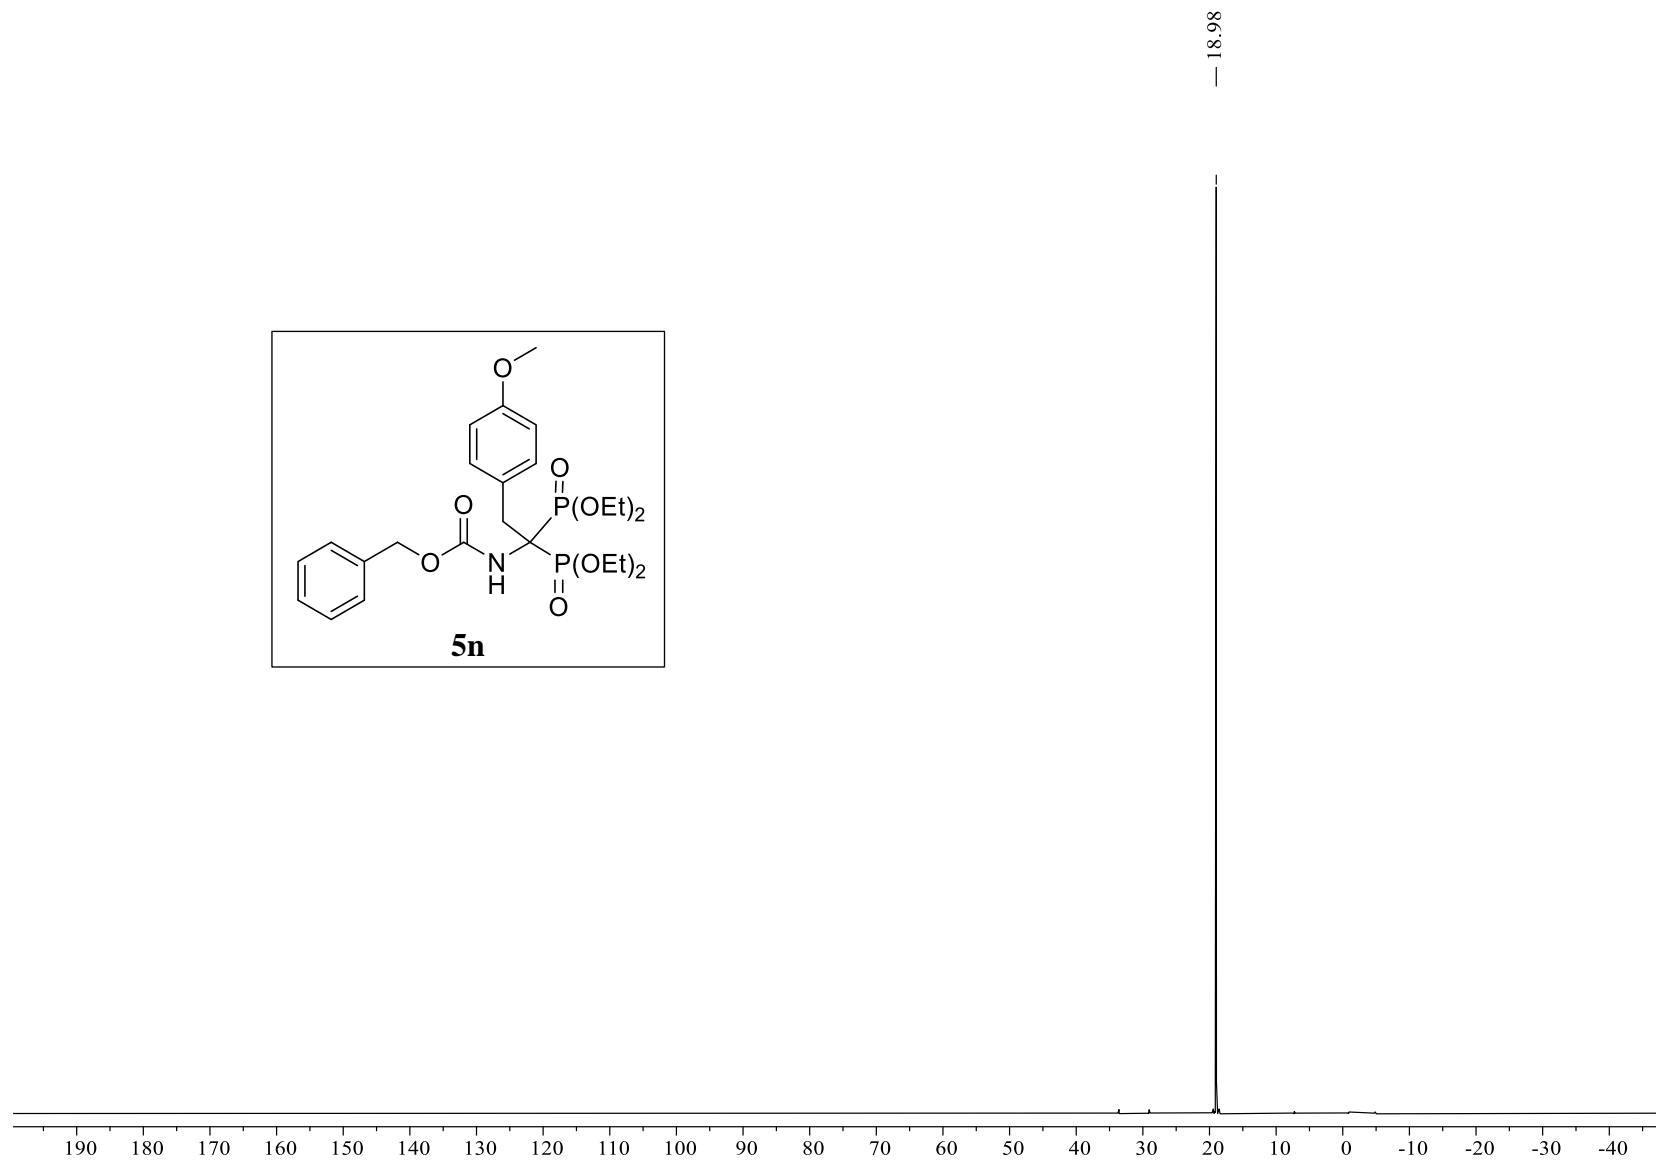

$^{31}\text{P}$  NMR spectrum of *tetraethyl 1-(N-benzyloxycarbonylamino)-2-(4-methoxyphenyl)ethylene-1,1-bisphosphonate (5n)*; 162 MHz/ $\text{CDCl}_3/\text{TMS}$ ;  $\delta$  (ppm).

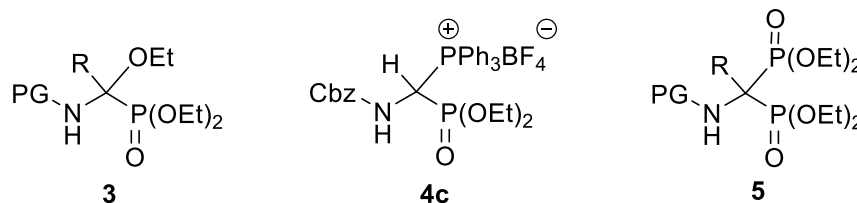

**Table S1.** Summary of characteristic  $^{13}\text{C}$  NMR data for all 1-(*N*-acylamino)-1-ethoxyalkylphosphonates **3**.

| $^{13}\text{C}$ NMR [100 MHz, $\text{CDCl}_3/\text{TMS}$ , $\delta$ (ppm) (multiplicity, $J$ (Hz))] |     |                                                                    |                        |                                                                            |                          |                                  |                                                                                                                  |
|-----------------------------------------------------------------------------------------------------|-----|--------------------------------------------------------------------|------------------------|----------------------------------------------------------------------------|--------------------------|----------------------------------|------------------------------------------------------------------------------------------------------------------|
| Comp.                                                                                               | PG  |                                                                    | R                      |                                                                            | $\text{C}_\alpha$        | OEt                              | P(O)OEt                                                                                                          |
| <b>3a</b>                                                                                           | Cbz | 154.6 (d, $J = 16.4$ Hz),<br>136.2, 128.5, 128.2, 128.1,<br>66.7   | Me                     | 18.9                                                                       | 84.4 (d, $J = 196.8$ Hz) | 58.5 (d, $J = 8.0$ Hz), 15.4     | 63.8 (d, $J = 6.9$ Hz), 63.4 (d, $J = 6.9$ Hz), 16.4 (d, $J = 5.3$ Hz)                                           |
| <b>3b</b>                                                                                           | Piv | 178.8 (d, $J = 9.9$ Hz), 39.9,<br>27.5                             | Me                     | 18.7                                                                       | 84.9 (d, $J = 194.5$ Hz) | 58.6 (d, $J = 9.5$ Hz), 15.5     | 63.9 (d, $J = 6.9$ Hz), 63.1 (d, $J = 6.9$ Hz), 16.5 (d, $J = 5.3$ Hz), 16.4 (d, $J = 5.4$ Hz)                   |
| <b>3c</b>                                                                                           | Cbz | 156.0 (d, $J = 12.2$ Hz),<br>135.9, 128.6, 128.3, 128.1,<br>67.4   | H                      | -                                                                          | 77.4 (d, $J = 201.1$ Hz) | 65.4 (d, $J = 12.9$ Hz),<br>14.9 | 63.7 (d, $J = 6.5$ Hz), 63.2 (d, $J = 6.9$ Hz), 16.38 (d, $J = 5.3$ Hz) and 16.36 (d, $J = 5.3$ Hz) <sup>b</sup> |
| <b>3d</b>                                                                                           | Cbz | 154.6 (d, $J = 16.4$ Hz),<br>136.1, 128.5, 128.24,<br>128.19, 66.8 | $\text{CH}_2\text{Ph}$ | 135.6 (d, $J = 3.6$ Hz),<br>131.2, 127.6, 126.5,<br>39.1 (d, $J = 2.9$ Hz) | 87.1 (d, $J = 186.5$ Hz) | 59.4 (d, $J = 4.6$ Hz), 15.2     | 63.2 (d, $J = 7.2$ Hz), 62.9 (d, $J = 7.2$ Hz), 16.3 (d, $J = 5.8$ Hz), 16.0 (d, $J = 6.1$ Hz)                   |
| <b>3e</b>                                                                                           | Ac  | 170.3 (d, $J = 9.2$ Hz), 24.5                                      | $\text{CH}_2\text{Ph}$ | 135.6 (d, $J = 4.0$ Hz),<br>131.1, 127.7, 126.6,<br>38.9                   | 87.6 (d, $J = 185.9$ Hz) | 59.9 (d, $J = 5.3$ Hz), 15.2     | 63.4 (d, $J = 7.2$ Hz), 62.8 (d, $J = 7.2$ Hz), 16.4 (d, $J = 6.1$ Hz), 16.1 (d, $J = 6.1$ Hz)                   |
| <b>3f</b>                                                                                           | Cbz | 154.4 (d, $J = 16.2$ ), 136.2,<br>128.5, 128.3, 128.1, 66.7        | Et                     | 25.2, 8.5 (d, $J = 2.1$ Hz)                                                | 87.7 (d, $J = 189.5$ Hz) | 58.4 (d, $J = 7.2$ Hz), 15.3     | 63.6 (d, $J = 7.2$ Hz), 63.1 (d, $J = 7.1$ Hz), 16.4 (d, $J = 5.7$ Hz)                                           |
| <b>3g</b>                                                                                           | Cbz | 154.4 (d, $J = 16.1$ Hz),<br>136.2, 128.5, 128.1, 128.0,<br>66.6   | Pr                     | 34.4, 17.2 (d, $J = 2.0$ Hz), 14.4                                         | 87.3 (d, $J = 189.7$ Hz) | 58.4 (d, $J = 7.4$ Hz), 15.3     | 63.6 (d, $J = 7.1$ Hz), 63.1 (d, $J = 7.0$ Hz), 16.4 (d, $J = 5.5$ Hz)                                           |
| <b>3h</b>                                                                                           | Cbz | 154.6 (d, $J = 18.2$ Hz),<br>136.3, 128.5, 128.2, 128.1,<br>66.7   | <i>i</i> -Pr           | 31.4, 17.7 (d, $J = 3.1$ Hz), 17.5                                         | 90.2 (d, $J = 185.8$ Hz) | 58.6 (d, $J = 6.5$ Hz), 15.3     | 63.4 (d, $J = 7.2$ Hz), 62.9 (d, $J = 7.6$ Hz), 16.4 (d, $J = 5.3$ Hz)                                           |

Table S1. Continued.

| <sup>13</sup> C NMR [100 MHz, CDCl <sub>3</sub> /TMS, δ (ppm) (multiplicity, J (Hz))] |     |                                                                  |                                                            |                                                                                 |                         |                            |                                                                                                                                 |
|---------------------------------------------------------------------------------------|-----|------------------------------------------------------------------|------------------------------------------------------------|---------------------------------------------------------------------------------|-------------------------|----------------------------|---------------------------------------------------------------------------------------------------------------------------------|
| Comp.                                                                                 | PG  |                                                                  | R                                                          |                                                                                 | C <sub>α</sub>          | OEt                        | P(O)OEt                                                                                                                         |
| 3i                                                                                    | Cbz | 154.3 (d, J = 16.1 Hz),<br>136.2, 128.4, 128.1, 128.0,<br>66.6   | Bu                                                         | 31.9, 25.8 (d, J = 1.9<br>Hz), 22.9, 13.9                                       | 87.3 (d, J = 189.5 Hz)  | 58.3 (d, J = 7.2 Hz), 15.2 | 63.5 (d, J = 7.2 Hz) and 63.1 (d, J<br>= 7.2 Hz) <sup>a</sup> , 16.3 (d, J = 5.6 Hz)                                            |
| 3j                                                                                    | Cbz | 154.4 (d, J = 16.7 Hz),<br>136.2, 128.5, 128.14,<br>128.06, 66.6 | <i>i</i> -Bu                                               | 40.3, 24.5 (d, J = 4.6<br>Hz), 23.2                                             | 87.9 (d, J = 188.2 Hz)  | 58.5 (d, J = 7.2 Hz), 15.1 | 63.8 (d, J = 7.2 Hz), 62.9 (d, J =<br>7.2 Hz), 16.40 (d, J = 5.7 Hz) and<br>16.38 (d, J = 5.7 Hz) <sup>b</sup>                  |
| 3k                                                                                    | Ac  | 170.1 (d, J = 12.9 Hz), 24.5                                     | <i>i</i> -Bu                                               | 39.7, 24.9, 24.7 (d,<br>J = 3.0 Hz), 23.1                                       | 88.8 (d, J = 187.3 Hz)  | 59.0 (d, J = 8.0 Hz), 15.1 | 64.1 (d, J = 7.2 Hz), 62.7 (d, J =<br>7.2 Hz), 16.43 (d, J = 6.1 Hz) and<br>16.40 (d, J = 5.3 Hz) <sup>b</sup>                  |
| 3l                                                                                    | Cbz | 154.4 (d, J = 14.3 Hz),<br>136.1, 128.5, 128.2, 128.1,<br>67.0   | CH <sub>2</sub> OMe                                        | 72.5, 59.4                                                                      | 86.0 (d, J = 188.8 Hz)  | 59.3 (d, J = 6.0 Hz), 15.4 | 63.6 (d, J = 7.2 Hz), 63.5 (d, J =<br>6.9 Hz), 16.4 (d, J = 5.7 Hz)                                                             |
| 3m                                                                                    | Cbz | 154.4 (d, J = 20.9 Hz),<br>136.0, 128.4, 128.14,<br>128.11, 67.0 | Ph                                                         | 127.75, 127.72,<br>127.41, 127.37                                               | 87.3 (d, J = 185.8 Hz)  | 59.8 (d, J = 6.1 Hz), 15.3 | 64.5 (d, J = 7.2 Hz), 63.8 (d, J =<br>7.7 Hz), 16.3 (d, J = 5.7 Hz), 16.2<br>(d, J = 5.6 Hz)                                    |
| <sup>13</sup> C NMR [100 MHz, CD <sub>3</sub> CN/TMS, δ (ppm) (multiplicity, J (Hz))] |     |                                                                  |                                                            |                                                                                 |                         |                            |                                                                                                                                 |
| 3n                                                                                    | Cbz | 155.4 (d, J = 14.1 Hz),<br>138.0, 129.5, 129.1, 129.0,<br>67.2   | 1,4-CH <sub>2</sub> -<br>C <sub>6</sub> H <sub>4</sub> OMe | 159.5, 133.1, 128.5<br>(d, J = 3.8 Hz), 114.0,<br>55.8, 39.1 (d, J = 5.0<br>Hz) | 88.3 (d, J = 187.3 Hz), | 60.1 (d, J = 4.2 Hz), 14.6 | 63.78 (d, J = 7.2 Hz) and 62.73 (d,<br>J = 7.2 Hz) <sup>a</sup> , 15.7 (d, J = 5.7 Hz)<br>and 15.6 (d, J = 5.7 Hz) <sup>b</sup> |

<sup>a</sup> Overlapping signals of P(O)(OCH<sub>2</sub>CH<sub>3</sub>)<sub>2</sub> groups. <sup>b</sup> Overlapping signals of P(O)(OCH<sub>2</sub>CH<sub>3</sub>)<sub>2</sub> groups.

Table S2. <sup>13</sup>C NMR data of diethyl 1-(*N*-benzyloxycarbonylamino)-1-triphenylphosphoniummethylphosphonate 4c.

| <sup>13</sup> C NMR [100 MHz, CDCl <sub>3</sub> /TMS, δ (ppm) (multiplicity, J (Hz))] |                               |                                                                                                  |                                                                                           |
|---------------------------------------------------------------------------------------|-------------------------------|--------------------------------------------------------------------------------------------------|-------------------------------------------------------------------------------------------|
| PG                                                                                    | C <sub>α</sub>                | <sup>+</sup> PPh <sub>3</sub>                                                                    | P(O)OEt                                                                                   |
| 156.3, 135.7, 128.4, 128.1,<br>128.0, 67.9                                            | 48.1 (dd, J = 152.8, 48.5 Hz) | 135.1 (d, J = 3.1 Hz), 134.8 (d, J = 10.3 Hz),<br>130.1 (d, J = 13.0 Hz), 116.9 (d, J = 84.7 Hz) | 65.1 (d, J = 7.6 Hz), 64.9 (d, J = 6.9 Hz), 16.1 (d, J = 6.1 Hz),<br>16.0 (d, J = 5.0 Hz) |

**Table S3.** Summary of characteristic  $^{13}\text{C}$  NMR data for all 1-(*N*-acylamino)alkylene-1,1-bisphosphonates **5**.

| $^{13}\text{C}$ NMR [100 MHz, $\text{CDCl}_3/\text{TMS}$ , $\delta$ (ppm) (multiplicity, <i>J</i> (Hz))] |     |                                                                  |                        |                                                                      |                               |                                                                                                                                                                                                                                                                                                        |
|----------------------------------------------------------------------------------------------------------|-----|------------------------------------------------------------------|------------------------|----------------------------------------------------------------------|-------------------------------|--------------------------------------------------------------------------------------------------------------------------------------------------------------------------------------------------------------------------------------------------------------------------------------------------------|
| Comp.                                                                                                    | PG  |                                                                  | R                      |                                                                      | $\text{C}_\alpha$             | $\text{P}(\text{O})(\text{OEt})_2$                                                                                                                                                                                                                                                                     |
| <b>5a</b>                                                                                                | Cbz | 154.3, 136.3, 128.4, 128.11, 128.09, 66.7                        | Me                     | 16.2 (br t, <i>J</i> = 4.1 Hz)                                       | 55.8 (t, <i>J</i> = 146.9 Hz) | 63.83 (d, <i>J</i> = 3.4 Hz) and 63.80 (d, <i>J</i> = 3.4 Hz) and 63.75 (d, <i>J</i> = 3.4 Hz) and 63.72 (d, <i>J</i> = 3.4 Hz) <sup>a</sup> , 16.5-16.3 (m) <sup>b</sup>                                                                                                                              |
| <b>5b</b>                                                                                                | Piv | 177.7 (t, <i>J</i> = 5.1 Hz), 39.8, 27.4                         | Me                     | 16.7 (t, <i>J</i> = 4.5 Hz)                                          | 56.7 (t, <i>J</i> = 144.9 Hz) | 63.76 (d, <i>J</i> = 3.4 Hz) and 63.73 (d, <i>J</i> = 3.4 Hz) and 63.67 (d, <i>J</i> = 3.4 Hz) and 63.64 (d, <i>J</i> = 3.4 Hz) <sup>a</sup> , 16.5-16.4 (m) <sup>b</sup>                                                                                                                              |
| <b>5c</b>                                                                                                | Cbz | 155.5 (t, <i>J</i> = 4.9 Hz), 135.9, 128.5, 128.3, 128.1, 67.6   | H                      | -                                                                    | 46.0 (t, <i>J</i> = 146.8 Hz) | 63.5, 16.3-16.2 (m) <sup>b</sup>                                                                                                                                                                                                                                                                       |
| <b>5d</b>                                                                                                | Cbz | 154.9 (t, <i>J</i> = 8.8 Hz), 136.4, 128.49, 128.45, 128.2, 67.1 | $\text{CH}_2\text{Ph}$ | 135.3 (t, <i>J</i> = 8.6 Hz), 131.2, 127.7, 126.7, 35.5              | 61.2 (t, <i>J</i> = 143.1 Hz) | 63.9 (d, <i>J</i> = 7.5 Hz), 63.0 (d, <i>J</i> = 7.4 Hz), 16.3 (d, <i>J</i> = 6.3 Hz), 16.2 (d, <i>J</i> = 6.2 Hz)                                                                                                                                                                                     |
| <b>5e</b>                                                                                                | Ac  | 169.9 (t, <i>J</i> = 7.3 Hz), 23.9                               | $\text{CH}_2\text{Ph}$ | 135.5 (t, <i>J</i> = 8.2 Hz), 131.1, 127.7, 126.9, 35.2              | 61.4 (t, <i>J</i> = 143.1 Hz) | 64.1 (d, <i>J</i> = 7.3 Hz), 62.9 (d, <i>J</i> = 7.6 Hz), 16.4 (d, <i>J</i> = 6.2 Hz), 16.1 (d, <i>J</i> = 6.5 Hz)                                                                                                                                                                                     |
| <b>5f</b>                                                                                                | Cbz | 154.3 (t, <i>J</i> = 8.0 Hz), 136.4, 128.4, 128.1, 66.8          | Et                     | 23.8 (t, <i>J</i> = 3.0 Hz), 9.1 (t, <i>J</i> = 6.5 Hz)              | 60.4 (t, <i>J</i> = 144.4 Hz) | 63.67 (d, <i>J</i> = 3.5 Hz) and 63.64 (d, <i>J</i> = 3.5 Hz) <sup>a</sup> , 63.42 (d, <i>J</i> = 3.5 Hz) and 63.38 (d, <i>J</i> = 3.5 Hz) <sup>a</sup> , 16.5-16.3 (m) <sup>b</sup>                                                                                                                   |
| <b>5g</b>                                                                                                | Cbz | 154.3 (t, <i>J</i> = 7.6 Hz), 136.4, 128.4, 128.1, 66.8          | Pr                     | 32.7 (t, <i>J</i> = 3.0 Hz), 17.7 (t, <i>J</i> = 6.2 Hz), 14.5       | 60.1 (t, <i>J</i> = 143.5 Hz) | 63.66 (d, <i>J</i> = 3.5 Hz) and 63.63 (d, <i>J</i> = 3.5 Hz) <sup>a</sup> , 63.43 (d, <i>J</i> = 3.5 Hz) and 63.40 (d, <i>J</i> = 3.5 Hz) <sup>a</sup> , 16.45 (d, <i>J</i> = 2.9 Hz) and 16.43 (d, <i>J</i> = 2.6 Hz) and 16.40 (d, <i>J</i> = 2.7 Hz) and 16.37 (d, <i>J</i> = 2.9 Hz) <sup>b</sup> |
| <b>5h</b>                                                                                                | Cbz | 154.3 (t, <i>J</i> = 8.2 Hz), 136.4, 128.4, 128.0, 66.8          | <i>i</i> -Pr           | 30.7, 18.8 (t, <i>J</i> = 4.3 Hz)                                    | 64.6 (t, <i>J</i> = 139.2 Hz) | 63.40 (d, <i>J</i> = 3.6 Hz) and 63.36 (d, <i>J</i> = 3.6 Hz) <sup>a</sup> , 63.11 (d, <i>J</i> = 3.5 Hz) and 63.08 (d, <i>J</i> = 3.6 Hz) <sup>a</sup> , 16.40 (d, <i>J</i> = 3.0 Hz) and 16.37 (d, <i>J</i> = 2.9 Hz) and 16.34 (d, <i>J</i> = 2.9 Hz) and 16.31 (d, <i>J</i> = 3.0 Hz) <sup>b</sup> |
| <b>5i</b>                                                                                                | Cbz | 154.3 (t, <i>J</i> = 7.3 Hz), 136.4, 128.4, 128.0, 66.7          | Bu                     | 30.4 (t, <i>J</i> = 3.0 Hz), 26.2 (t, <i>J</i> = 6.0 Hz), 23.0, 13.9 | 60.0 (t, <i>J</i> = 144.4 Hz) | 63.59 (d, <i>J</i> = 3.5 Hz) and 63.55 (d, <i>J</i> = 3.5 Hz) <sup>a</sup> , 63.38 (d, <i>J</i> = 3.4 Hz) and 63.34 (d, <i>J</i> = 3.5 Hz) <sup>a</sup> , 16.39 (d, <i>J</i> = 2.7 Hz) and 16.36 (d, <i>J</i> = 2.6 Hz) and 16.33 (d, <i>J</i> = 2.6 Hz) and 16.31 (d, <i>J</i> = 2.7 Hz) <sup>b</sup> |
| <b>5j</b>                                                                                                | Cbz | 154.4 (t, <i>J</i> = 8.0 Hz), 136.4, 128.4, 128.14, 128.06, 66.9 | <i>i</i> -Bu           | 38.6 (t, <i>J</i> = 2.2 Hz), 25.2 (t, <i>J</i> = 7.8 Hz), 24.2       | 60.7 (t, <i>J</i> = 142.9 Hz) | 63.56 (d, <i>J</i> = 3.5 Hz) and 63.52 (d, <i>J</i> = 3.5 Hz) <sup>a</sup> , 63.34 (d, <i>J</i> = 3.5 Hz) and 63.30 (d, <i>J</i> = 3.5 Hz) <sup>a</sup> , 16.44-16.26 (m) <sup>b</sup> .                                                                                                               |

|           |     |                                                                    |                                                        |                                                                                  |                           |                                                                                                                                                                                               |
|-----------|-----|--------------------------------------------------------------------|--------------------------------------------------------|----------------------------------------------------------------------------------|---------------------------|-----------------------------------------------------------------------------------------------------------------------------------------------------------------------------------------------|
| <b>5k</b> | Ac  | 169.2 (t, $J = 6.9$ Hz), 23.9                                      | <i>i</i> -Bu                                           | 38.4 (t, $J = 2.6$ Hz), 25.4 (t, $J = 8.0$ Hz), 24.2                             | 60.9 (t, $J = 143.2$ Hz)  | 63.6 (d, $J = 7.3$ Hz), 63.1 (d, $J = 7.2$ Hz), 16.4 (d, $J = 6.0$ Hz) and 16.3 (d, $J = 6.3$ Hz) <sup>b</sup>                                                                                |
| <b>5l</b> | Cbz | $\delta$ 154.4 (t, $J = 6.2$ Hz), 136.3, 128.4, 128.1, 128.0, 66.9 | CH <sub>2</sub> OMe                                    | 70.1, 59.1                                                                       | 60.5 (t, $J = 142.7$ Hz)  | 63.59 (d, $J = 3.5$ Hz) and 63.55 (d, $J = 3.6$ Hz) and 63.52 (d, $J = 3.6$ Hz) <sup>a</sup> , 16.4-16.3 (m) <sup>b</sup>                                                                     |
| <b>5m</b> | Cbz | 154.4 (br s), 136.3, 128.4, 67.1 <sup>c</sup>                      | Ph                                                     | 132.0, 128.1 (t, $J = 5.0$ Hz), 127.6 (t, $J = 2.6$ Hz), 127.5 (t, $J = 2.3$ Hz) | 64.15 (t, $J = 140.4$ Hz) | 64.25 (d, $J = 3.7$ Hz) and 64.21 (d, $J = 3.6$ Hz) and 64.08 (d, $J = 3.6$ Hz) and 64.05 (d, $J = 3.8$ Hz) <sup>a</sup> , 16.26 (d, $J = 3.1$ Hz) and 16.23 (d, $J = 3.0$ Hz) <sup>b</sup> . |
| <b>5n</b> | Cbz | 154.9 (t, $J = 8.8$ Hz), 136.3, 128.46, 128.45, 128.2, 67.0        | 1,4-CH <sub>2</sub> -C <sub>6</sub> H <sub>4</sub> OMe | 158.5, 132.1, 127.2 (t, $J = 8.6$ Hz), 113.1, 55.2, 34.7                         | 61.1 (t, $J = 143.0$ Hz)  | 63.9 (d, $J = 7.4$ Hz), 63.0 (d, $J = 7.6$ Hz), 16.3 (d, $J = 6.3$ Hz), 16.2 (d, $J = 6.2$ Hz)                                                                                                |

<sup>a</sup> Overlapping signals of P(O)(OCH<sub>2</sub>CH<sub>3</sub>)<sub>2</sub> groups. <sup>b</sup> Overlapping signals of P(O)(OCH<sub>2</sub>CH<sub>3</sub>)<sub>2</sub> groups. <sup>c</sup> The lower number of expected signals results from the probable overlap with the signals of the Ph group at the  $\alpha$  position.
